# Supplementary material for: Controllability in Cancer Metabolic Networks According to Drug Targets as Driver Nodes
Source: PLoS One. 2013 Nov 25;8(11):e79397. doi: 10.1371/journal.pone.0079397 (PMC3839908; doi:10.1371/journal.pone.0079397)
Supplement: File S3 — Lists of metabolites and reactions of normal models. (XLSX) [file pone.0079397.s003.xlsx]

## Sheet: iBreastGlandular1532
Metabolite ID	Metabolite Name					Reaction ID	Reaction Name
'm1'	'Reduced acceptor'					'11'	'2 Prostaglandin H2+Oxygen=2 Prostaglandin G2'
'm2'	'Reduced acceptor'					'13'	'Oxygen+4 Fe2++4 H+=4 Fe3++2 H2O'
'm3'	'Reduced acceptor'					'14'	'Oxygen+4 Fe2++4 H+=4 Fe3++2 H2O'
'm4'	'Reduced ferredoxin'					'17'	'ATP+H2O=ADP+Orthophosphate'
'm5'	'Oxidized ferredoxin'					'18'	'ATP+H2O=ADP+Orthophosphate'
'm6'	'Ferricytochrome b5'					'19'	'ATP+H2O=ADP+Orthophosphate'
'm7'	'Ferricytochrome b5'					'20'	'ATP+H2O=ADP+Orthophosphate'
'm8'	'Ferrocytochrome b5'					'21'	'ATP+H2O=ADP+Orthophosphate'
'm9'	'Ferrocytochrome b5'					'22'	'ATP+H2O=ADP+Orthophosphate'
'm10'	'Protamine'					'23'	'ATP=3'',5''-Cyclic AMP+Pyrophosphate'
'm11'	'O-Phosphoprotamine'					'25'	'NAD++2 Glutathione=Oxidized glutathione+NADH'
'm12'	'Electron-transferring flavoprotein'					'26'	'NADH+2 Ferricytochrome b5=NAD++2 Ferrocytochrome b5'
'm13'	'Reduced electron-transferring flavoprotein'					'28'	'NADH+2 Ferricytochrome b5=NAD++2 Ferrocytochrome b5'
'm14'	'Glutaredoxin'					'30'	'NAD++H2O=AMP+Nicotinamide D-ribonucleotide'
'm15'	'Glutaredoxin'					'31'	'NAD++H2O=AMP+Nicotinamide D-ribonucleotide'
'm16'	'Glutaredoxin disulfide'					'32'	'NAD++H2O=AMP+Nicotinamide D-ribonucleotide'
'm17'	'Glutaredoxin disulfide'					'34'	'NAD++H2O=AMP+Nicotinamide D-ribonucleotide'
'm18'	'Benzo[a]pyrene-2,3-diol'					'35'	'ATP+NAD+=ADP+NADP+'
'm19'	'Benzo[a]pyrene-2,3-diol'					'41'	'NADPH+NAD+=NADP++NADH'
'm20'	'Benzo[a]pyrene-2,3-diol'					'42'	'NADPH+NAD+=NADP++NADH'
'm21'	'Benzo[a]pyrene-4,5-diol'					'44'	'NADP++2 Glutathione=Oxidized glutathione+NADPH+H+'
'm22'	'Benzo[a]pyrene-4,5-diol'					'46'	'ADP+H2O=AMP+Orthophosphate'
'm23'	'Benzo[a]pyrene-4,5-diol'					'50'	'ATP+AMP=2 ADP'
'm24'	'Benzo[a]pyrene-9,10-diol'					'51'	'ATP+AMP=2 ADP'
'm25'	'Benzo[a]pyrene-9,10-diol'					'52'	'ATP+AMP=2 ADP'
'm26'	'Benzo[a]pyrene-9,10-diol'					'55'	'ATP+Nicotinamide D-ribonucleotide=Pyrophosphate+NAD+'
'm27'	'Benzo[a]pyrene-2,3-oxide'					'58'	'UDP+H2O=UMP+Orthophosphate'
'm28'	'Benzo[a]pyrene-2,3-oxide'					'59'	'UDP+H2O=UMP+Orthophosphate'
'm29'	'Benzo[a]pyrene-2,3-oxide'					'60'	'UDP+H2O=UMP+Orthophosphate'
'm30'	'Dibenzo[a,l]pyrene-11,12-epoxide'					'61'	'UDP+H2O=UMP+Orthophosphate'
'm31'	'Dibenzo[a,l]pyrene-11,12-epoxide'					'62'	'ATP+UDP=ADP+UTP'
'm32'	'Dibenzo[a,l]pyrene-11,12-diol'					'64'	'ATP+UDP=ADP+UTP'
'm33'	'Dibenzo[a,l]pyrene-11,12-diol'					'65'	'UTP+AMP=UDP+ADP'
'm34'	'7,12-Dimethylbenz[a]anthracene-3,4-oxide'					'66'	'ATP+UMP=ADP+UDP'
'm35'	'7,12-Dimethylbenz[a]anthracene-3,4-oxide'					'67'	'ATP+UMP=ADP+UDP'
'm36'	'7,12-Dimethylbenz[a]anthracene-3,4-diol'					'68'	'UTP+H2O=UDP+Orthophosphate'
'm37'	'7,12-Dimethylbenz[a]anthracene-3,4-diol'					'69'	'UTP+H2O=UDP+Orthophosphate'
'm38'	'Reduced-Quinones'					'70'	'UTP+H2O=UDP+Orthophosphate'
'm39'	'ACYL-SN-GLYCEROL-3P'					'71'	'UTP+H2O=UDP+Orthophosphate'
'm40'	'Fatty-Acyl-CoA'					'73'	'FAD+H2O=AMP+FMN'
'm41'	'Diacylglycerides'					'74'	'ATP+FMN=Pyrophosphate+FAD'
'm42'	'Diacylglycerides'					'90'	'Orthophosphate+Pyrophosphate+S-Adenosyl-L-methionine=ATP +L-Methionine+H2O'
'm43'	'Semiquinones'					'91'	'S-Adenosyl-L-methionine=S-Adenosylmethioninamine+CO2'
'm44'	'Protein-Disulfides'					'94'	'AMP+H2O=IMP+NH3'
'm45'	'Starch'					'96'	'AMP+H2O=Adenosine+Orthophosphate'
'm46'	'Starch'					'97'	'AMP+H2O=Adenosine+Orthophosphate'
'm47'	'Dermatan'					'109'	'ATP+Pyruvate=ADP+Phosphoenolpyruvate'
'm48'	'Hyaluronate'					'111'	'Pyruvate+CoA+NAD+=Acetyl-CoA+CO2+NADH'
'm49'	'Hyaluronate'					'113'	'Pyruvate+CoA+NADP+=Acetyl-CoA+CO2+NADPH'
'm50'	'Amylose'					'115'	'(S)-Malate+NAD+=Pyruvate+CO2+NADH'
'm51'	'Amylose'					'117'	'(S)-Malate+NADP+=Pyruvate+CO2+NADPH'
'm52'	'Chlordecone'					'127'	'2 Acetyl-CoA=CoA+Acetoacetyl-CoA'
'm53'	'Protein-Tyrosines'					'131'	'L-Glutamate+NAD++H2O=2-Oxoglutarate+NH3+NADH+H+'
'm54'	'Protein tyrosine'					'132'	'L-Glutamate 5-semialdehyde+NAD++H2O=L-Glutamate+NADH+H+'
'm55'	'Protein tyrosine'					'134'	'L-Glutamate+NADP++H2O=2-Oxoglutarate+NH3+NADPH+H+'
'm56'	'Protein tyrosine'					'137'	'ATP+L-Glutamate+NH3=ADP+Orthophosphate+L-Glutamine'
'm57'	'1,2-Dihydronaphthalene-1,2-diol'					'139'	'L-Glutamine+H2O=L-Glutamate+NH3'
'm58'	'1,2-Dihydronaphthalene-1,2-diol'					'141'	'L-Alanine+2-Oxoglutarate=Pyruvate+L-Glutamate (reversible)'
'm59'	'1,2-Dihydronaphthalene-1,2-diol'					'142'	'Acetyl-CoA+L-Glutamate=CoA+N-Acetyl-L-glutamate'
'm60'	'1,2-Dihydroxy-3,4-epoxy-1,2,3,4-tetrahydronaphthalene'					'148'	'Oxalosuccinate=2-Oxoglutarate+CO2'
'm61'	'5-hydroxytryptophol'					'150'	'H2O2+2 Glutathione=Oxidized glutathione+2 H2O'
'm62'	'Protein tyrosine phosphate'					'151'	'H2O2+2 Glutathione=Oxidized glutathione+2 H2O'
'm63'	'Protein tyrosine phosphate'					'152'	'2 O2.-+2 H+=H2O2+Oxygen'
'm64'	'Protein tyrosine phosphate'					'153'	'2 O2.-+2 H+=H2O2+Oxygen'
'm65'	'Indole-3-ethanol'					'155'	'2 O2.-+2 H+=H2O2+Oxygen (reversible)'
'm66'	'Tryptamine'					'157'	'2 O2.-+2 H+=H2O2+Oxygen (reversible)'
'm67'	'Tryptamine'					'159'	'Pyridoxine phosphate+Oxygen=H2O2+Pyridoxal phosphate'
'm68'	'Serotonin'					'161'	'UDPglucose+H2O=UMP+D-Glucose 1-phosphate'
'm69'	'Serotonin'					'162'	'UDPglucose+H2O=UMP+D-Glucose 1-phosphate'
'm70'	'L-Kynurenine'					'165'	'UDPglucose+Amylose=UDP+Amylose'
'm71'	'Kynurenine'					'166'	'Protoporphyrin+Fe2+=Heme+2 H+ (reversible)'
'm72'	'3-Hydroxykynurenine'					'167'	'Protoporphyrin+Fe2+=Heme+2 H+'
'm73'	'3-Hydroxy-L-kynurenine'					'169'	'ATP+Acetate=Pyrophosphate+Acetyl adenylate'
'm74'	'3-Hydroxy-L-kynurenine'					'171'	'GDP+H2O=GMP+Orthophosphate'
'm75'	'serotonin _ST_i_LT_O_ST_/i_LT_-sulfate'					'172'	'GDP+H2O=GMP+Orthophosphate'
'm76'	'Deoxyinosine'					'173'	'GDP+H2O=GMP+Orthophosphate'
'm77'	'Deoxyinosine'					'176'	'GDP+H2O=GMP+Orthophosphate'
'm78'	'Thioredoxin disulfide'					'181'	'ATP+GDP=ADP+GTP'
'm79'	'Thioredoxin disulfide'					'183'	'ATP+GDP=ADP+GTP'
'm80'	'Thioredoxin disulfide'					'184'	'ATP+GMP=ADP+GDP'
'm81'	'Inosine'					'188'	'GTP+H2O=GDP+Orthophosphate'
'm82'	'Inosine'					'189'	'GTP+H2O=GDP+Orthophosphate'
'm83'	'Inosine'					'192'	'(S)-Malate+NAD+=Oxaloacetate+NADH+H+'
'm84'	'Xanthosine'					'197'	'L-Aspartate+2-Oxoglutarate=Oxaloacetate+L-Glutamate'
'm85'	'Xanthosine'					'198'	'L-Aspartate+2-Oxoglutarate=Oxaloacetate+L-Glutamate'
'm86'	'Xanthosine'					'201'	'Citrate=Acetate+Oxaloacetate'
'm87'	'3'',5''-Cyclic AMP'					'202'	'Citrate=Acetate+Oxaloacetate'
'm88'	'3'',5''-Cyclic GMP'					'203'	'Glycine+H2O+Oxygen=Glyoxylate+NH3+H2O2'
'm89'	'3'',5''-Cyclic GMP'					'206'	'L-Alanine+Glyoxylate=Pyruvate+Glycine (reversible)'
'm90'	'3-_ST_i_LT_O_ST_/i_LT_-methyldopa'					'207'	'Acetyl-CoA+Glycine=CoA+L-2-Amino-3-oxobutanoic acid'
'm91'	'Orotidine 5''-phosphate'					'224'	'Succinyl-CoA+Acetoacetate=Succinate+Acetoacetyl-CoA'
'm92'	'IMP'					'226'	'UDP-N-acetyl-D-glucosamine=UDP-N-acetyl-D-mannosamine'
'm93'	'IMP'					'231'	'GTP+Pyruvate=GDP+Phosphoenolpyruvate'
'm94'	'IMP'					'232'	'GTP+Oxaloacetate=GDP+Phosphoenolpyruvate+CO2'
'm95'	'IMP'					'235'	'GTP=3'',5''-Cyclic GMP+Pyrophosphate'
'm96'	'Xanthosine 5''-phosphate'					'236'	'GTP=3'',5''-Cyclic GMP+Pyrophosphate'
'm97'	'Xanthosine 5''-phosphate'					'258'	'Glycolate+NADP+=Glyoxylate+NADPH (reversible)'
'm98'	'Xanthosine 5''-phosphate'					'264'	'ATP+gamma-L-Glutamyl-L-cysteine+Glycine=ADP+Orthophosphate+ Glutathione'
'm99'	'Deoxyadenosine'					'266'	'UDP-D-galactose+D-Glucose=UDP+Lactose'
'm100'	'Deoxyadenosine'					'267'	'UDP-D-galactose+D-Glucose=UDP+Lactose'
'm101'	'Deoxyadenosine'					'268'	'UDP-D-galactose+D-Glucose=UDP+Lactose'
'm102'	'Deoxyadenosine'					'269'	'3''-Phosphoadenylyl sulfate+H2O=Sulfate+Adenosine3'',5''-bisphosphate'
'm103'	'Adenosine'					'270'	'3''-Phosphoadenylyl sulfate+H2O=Sulfate+Adenosine3'',5''-bisphosphate'
'm104'	'Adenosine'					'273'	'CMP+H2O=Cytidine+Orthophosphate'
'm105'	'Deoxyguanosine'					'275'	'CMP+H2O=Cytidine+Orthophosphate'
'm106'	'Deoxyguanosine'					'276'	'CMP+H2O=Cytidine+Orthophosphate'
'm107'	'Deoxyguanosine'					'277'	'CMP+H2O=Cytidine+Orthophosphate'
'm108'	'Deoxyguanosine'					'278'	'ATP+CMP=ADP+CDP'
'm109'	'Guanosine'					'279'	'ATP+CMP=ADP+CDP'
'm110'	'Guanosine'					'281'	'CDP+H2O=CMP+Orthophosphate'
'm111'	'Guanosine'					'282'	'CDP+H2O=CMP+Orthophosphate'
'm112'	'Guanosine'					'283'	'CDP+H2O=CMP+Orthophosphate'
'm113'	'Porphobilinogen'					'284'	'CDP+H2O=CMP+Orthophosphate'
'm114'	'Thymidine'					'289'	'ATP+Sulfate=Pyrophosphate+Adenylylsulfate'
'm115'	'Thymidine'					'290'	'Sulfite+Oxygen+H2O=Sulfate+H2O2'
'm116'	'Thymidine'					'291'	'Sulfite+Oxygen+H2O=Sulfate+H2O2'
'm117'	'Thymidine'					'293'	'FMN+H2O=Riboflavin+Orthophosphate'
'm118'	'IDP'					'307'	'CTP+H2O=CDP+Orthophosphate'
'm119'	'IDP'					'308'	'CTP+H2O=CDP+Orthophosphate'
'm120'	'IDP'					'309'	'CTP+H2O=CDP+Orthophosphate'
'm121'	'Thioredoxin'					'310'	'CTP+H2O=CDP+Orthophosphate'
'm122'	'Thioredoxin'					'313'	'ATP+CDP=ADP+CTP'
'm123'	'Thioredoxin'					'319'	'L-Serine+Pyruvate=Hydroxypyruvate+L-Alanine'
'm124'	'Adenylyl sulfate'					'325'	'Methanol+H2O2=Formaldehyde+2 H2O'
'm125'	'dAMP'					'330'	'Sarcosine+H2O+Oxygen=Glycine+Formaldehyde+H2O2'
'm126'	'dAMP'					'332'	'Sarcosine+Acceptor+H2O=Glycine+Formaldehyde+Reducedacceptor'
'm127'	'dAMP'					'333'	'ATP+Thiamin diphosphate=ADP+Thiamin triphosphate'
'm128'	'dAMP'					'336'	'2-Oxoglutarate+Thiamin diphosphate ST = LT 3-Carboxy-1-hydroxypropyl-ThPP+CO2'
'm129'	'AMP'					'343'	'2-Phospho-D-glycerate=Phosphoenolpyruvate+H2O'
'm130'	'AMP'					'344'	'2-Phospho-D-glycerate=Phosphoenolpyruvate+H2O'
'm131'	'AMP'					'345'	'UTP+Pyruvate=UDP+Phosphoenolpyruvate'
'm132'	'AMP'					'346'	'UTP+H2O=UMP+Pyrophosphate'
'm133'	'AMP'					'348'	'L-Ornithine+2-Oxoglutarate=L-Glutamate 5-semialdehyde +L-Glutamate'
'm134'	'AMP'					'350'	'L-Ornithine=Putrescine+CO2'
'm135'	'dGMP'					'351'	'L-Ornithine=Putrescine+CO2'
'm136'	'dGMP'					'354'	'L-Tryptophan=Tryptamine+CO2'
'm137'	'dGMP'					'357'	'L-Phenylalanine+2-Oxoglutarate=Phenylpyruvate+L-Glutamate'
'm138'	'GMP'					'358'	'L-Phenylalanine=2-Phenylacetamide'
'm139'	'GMP'					'360'	'L-Phenylalanine=Phenethylamine+CO2'
'm140'	'GMP'					'362'	'2 trans,trans-Farnesyl diphosphate=Pyrophosphate+Presqualenediphosphate+H+'
'm141'	'GMP'					'364'	'(R)-Lactate+NAD+=Pyruvate+NADH+H+ (reversible)'
'm142'	'GMP'					'365'	'3-Oxopropanoate+CoA+NAD+=Acetyl-CoA+CO2+NADH+H+'
'm143'	'GMP'					'366'	'3-Oxopropanoate+CoA+NADP+=Acetyl-CoA+CO2+NADPH+H+'
'm144'	'Parathion'					'367'	'(S)-1-Pyrroline-5-carboxylate+NAD++2 H2O=L-Glutamate+NADH+ H+'
'm145'	'Paraoxon'					'368'	'(S)-1-Pyrroline-5-carboxylate+NADP++2 H2O=L-Glutamate +NADPH+H+'
'm146'	'dTMP'					'370'	'Isocitrate+NAD+=2-Oxoglutarate+CO2+NADH+H+'
'm147'	'dTMP'					'371'	'Acetaldehyde+NAD++H2O=Acetate+NADH+H+'
'm148'	'dTMP'					'372'	'Acetaldehyde+NAD++H2O=Acetate+NADH+H+'
'm149'	'dTMP'					'373'	'Acetaldehyde+NADP++H2O=Acetate+NADPH+H+'
'm150'	'dTMP'					'374'	'Acetaldehyde+NADP++H2O=Acetate+NADPH+H+'
'm151'	'ITP'					'375'	'Succinate semialdehyde+NAD++H2O=Succinate+NADH+H+ (reversible)'
'm152'	'ITP'					'376'	'Succinate semialdehyde+NAD++H2O=Succinate+NADH+H+'
'm153'	'ITP'					'377'	'N6-(L-1,3-Dicarboxypropyl)-L-lysine+NAD++H2O=L-Lysine +2-Oxoglutarate+NADH+H+'
'm154'	'1-(5''-Phosphoribosyl)-5-formamido-4-imidazolecarboxamide'					'378'	'N6-(L-1,3-Dicarboxypropyl)-L-lysine+NADP++H2O=L-Lysine +2-Oxoglutarate+NADPH+H+'
'm155'	'ADP'					'380'	'ITP+H2O=IDP+Orthophosphate'
'm156'	'ADP'					'381'	'ITP+H2O=IDP+Orthophosphate'
'm157'	'ADP'					'386'	'ATP+IDP=ADP+ITP'
'm158'	'ADP'					'388'	'ATP+IDP=ADP+ITP'
'm159'	'ADP'					'389'	'ITP+D-Glucose=IDP+D-Glucose 6-phosphate'
'm160'	'ADP'					'391'	'ITP+Oxaloacetate=IDP+Phosphoenolpyruvate+CO2'
'm161'	'Adenosine 3'',5''-bisphosphate'					'398'	'L-Tyrosine+2-Oxoglutarate=3-(4-Hydroxyphenyl)pyruvate +L-Glutamate'
'm162'	'Adenosine 3'',5''-bisphosphate'					'400'	'L-Tyrosine=Tyramine+CO2'
'm163'	'Adenosine 3'',5''-bisphosphate'					'401'	'L-Tyrosine=Tyramine+CO2'
'm164'	'dGDP'					'403'	'L-Tyrosine=Tyramine+CO2'
'm165'	'dGDP'					'404'	'3-Oxopropanoate+CoA+NADP+=Malonyl-CoA+NADPH'
'm166'	'dGDP'					'406'	'Ethanol+NADP+=Acetaldehyde+NADPH'
'm167'	'GDP'					'412'	'L-Glutamine+D-Fructose 6-phosphate=L-Glutamate+D-Glucosamine6-phosphate'
'm168'	'GDP'					'413'	'D-Mannose 6-phosphate=D-Fructose 6-phosphate'
'm169'	'GDP'					'423'	'Succinyl-CoA+Acetyl-CoA=CoA+3-Oxoadipyl-CoA'
'm170'	'GDP'					'425'	'Succinyl-CoA+Glycine=5-Aminolevulinate+CoA+CO2'
'm171'	'GDP'					'426'	'Succinyl-CoA+Glycine=2-Amino-3-oxoadipate+CoA'
'm172'	'GDP'					'427'	'(R)-2-Methyl-3-oxopropanoyl-CoA=Succinyl-CoA (reversible)'
'm173'	'3''-Phosphoadenylyl sulfate'					'428'	'1L-myo-Inositol 1-phosphate=D-Glucose 6-phosphate (reversible)'
'm174'	'3''-Phosphoadenylyl sulfate'					'429'	'sn-Glycerol 3-phosphate+NAD+=Glycerone phosphate+NADH+H+'
'm175'	'3''-Phosphoadenylyl sulfate'					'430'	'sn-Glycerol 3-phosphate+NAD+=Glycerone phosphate+NADH+H+'
'm176'	'dADP'					'432'	'ATP+Glycerol=ADP+sn-Glycerol 3-phosphate'
'm177'	'dADP'					'433'	'sn-Glycerol 3-phosphate+FAD=Glycerone phosphate+FADH2'
'm178'	'dADP'					'434'	'sn-Glycerol 3-phosphate+FAD=Glycerone phosphate+FADH2'
'm179'	'L-Metanephrine'					'435'	'sn-Glycerol 3-phosphate+Acceptor=Glycerone phosphate+Reducedacceptor'
'm180'	'L-Metanephrine'					'436'	'sn-Glycerol 3-phosphate+Acceptor=Glycerone phosphate+Reducedacceptor'
'm181'	'dTDP'					'438'	'sn-Glycerol 3-phosphate+Acyl-CoA=1-Acyl-sn-glycerol3-phosphate+CoA'
'm182'	'dTDP'					'440'	'ATP+D-Fructose=ADP+beta-D-Fructose 6-phosphate'
'm183'	'dTDP'					'442'	'ITP+D-Fructose=IDP+D-Fructose 6-phosphate'
'm184'	'dTDP'					'449'	'L-Cysteine+Oxygen=3-Sulfino-L-alanine'
'm185'	'dTDP'					'450'	'ATP+L-Glutamate+L-Cysteine=ADP+Orthophosphate +gamma-L-Glutamyl-L-cysteine'
'm186'	'dTDP'					'451'	'L-Cysteine+2-Oxoglutarate=Mercaptopyruvate+Glutamate'
'm187'	'dATP'					'452'	'L-Cysteine+2-Oxoglutarate=Mercaptopyruvate+Glutamate'
'm188'	'dATP'					'453'	'Cys-Gly+H2O=L-Cysteine+Glycine'
'm189'	'dATP'					'454'	'beta-Aminopropion aldehyde+NAD++H2O=beta-Alanine+NADH'
'm190'	'ATP'					'456'	'beta-Aminopropion aldehyde+NAD++H2O=beta-Alanine+NADH'
'm191'	'ATP'					'459'	'beta-Alanine+2-Oxoglutarate=3-Oxopropanoate+L-Glutamate'
'm192'	'ATP'					'462'	'Propinol adenylate+CoA=AMP+Propanoyl-CoA'
'm193'	'ATP'					'463'	'Propanoyl-CoA+Acetyl-CoA=CoA+2-Methylacetoacetyl-CoA'
'm194'	'ATP'					'464'	'(S)-Methylmalonate semialdehyde+CoA+NAD+=Propanoyl-CoA+CO2+ NADH+H+'
'm195'	'ATP'					'472'	'ATP+Tetrahydrofolate+L-Glutamate=ADP+Orthophosphate +Tetrahydrofolyl-[Glu](2)'
'm196'	'ATP'					'473'	'ATP+Tetrahydrofolate+L-Glutamate=ADP+Orthophosphate +Tetrahydrofolyl-[Glu](2)'
'm197'	'dGTP'					'475'	'Tetrahydrofolate+Formate+ATP=ADP+Orthophosphate +10-Formyltetrahydrofolate'
'm198'	'dGTP'					'476'	'5,10-Methylenetetrahydrofolate+Glycine+H2O=Tetrahydrofolate+ L-Serine'
'm199'	'dGTP'					'477'	'5,10-Methylenetetrahydrofolate+Glycine+H2O=Tetrahydrofolate+ L-Serine'
'm200'	'GTP'					'480'	'UDPglucose+alpha-D-Galactose 1-phosphate=D-Glucose 1-phosphate+ UDP-D-galactose'
'm201'	'GTP'					'481'	'D-Glucose 1-phosphate=alpha-D-Glucose 6-phosphate'
'm202'	'GTP'					'483'	'IDP+H2O=IMP+Orthophosphate'
'm203'	'Aminoparathion'					'489'	'UMP+H2O=Uridine+Orthophosphate'
'm204'	'dTTP'					'492'	'UMP+H2O=Uridine+Orthophosphate'
'm205'	'dTTP'					'493'	'UMP+H2O=Uridine+Orthophosphate'
'm206'	'dTTP'					'507'	'UDPglucose+Dolichyl phosphate=UDP+Dolichyl beta-D-glucosylphosphate'
'm207'	'dTTP'					'509'	'UDP-N-acetyl-D-glucosamine+Dolichyl phosphate=UMP +N-Acetyl-D-glucosaminyldiphosphodolichol'
'm208'	'dTTP'					'510'	'UDP-N-acetyl-D-glucosamine+Dolichyl phosphate=UMP +N-Acetyl-D-glucosaminyldiphosphodolichol'
'm209'	'dTTP'					'511'	'GDPmannose+Dolichyl phosphate=GDP+Dolichyl phosphateD-mannose'
'm210'	'Glutathione'					'518'	'ATP+Choline=ADP+Choline phosphate'
'm211'	'Glutathione'					'519'	'Acetyl-CoA+Choline=CoA+Acetylcholine'
'm212'	'Glutathione'					'521'	'Choline+Acceptor=Betaine aldehyde+Reduced acceptor'
'm213'	'Glutathione'					'522'	'Acetylcholine+H2O=Choline+Acetate'
'm214'	'N-Acylneuraminate 9-phosphate'					'523'	'Acetylcholine+H2O=Choline+Acetate'
'm215'	'Ecgonine methyl ester'					'524'	'Acetylcholine+H2O=Choline+Acetate'
'm216'	'N-(L-Arginino)succinate'					'525'	'Acylcholine+H2O=Choline+Carboxylate'
'm217'	'Phosphatidylcholine'					'528'	'Glycerol+NAD+=D-Glyceraldehyde+NADH+H+'
'm218'	'Phosphatidylcholine'					'529'	'Glycerol+NAD+=D-Glyceraldehyde+NADH+H+'
'm219'	'Phosphatidylcholine'					'531'	'Glycerol+NADP+=D-Glyceraldehyde+NADPH+H+'
'm220'	'Phosphatidylcholine'					'532'	'Glycerol+NADP+=D-Glyceraldehyde+NADPH+H+'
'm221'	'S-Acetyldihydrolipoamide'					'537'	'Uracil+D-Ribose 5-phosphate=Pseudouridine 5''-phosphate+H2O'
'm222'	'spermic acid 2'					'551'	'(S)-Malate=Fumarate+H2O'
'm223'	'spermic acid 2'					'554'	'L-Leucine+2-Oxoglutarate=4-Methyl-2-oxopentanoate +L-Glutamate'
'm224'	'spermic acid 2'					'555'	'L-Leucine+2-Oxoglutarate=4-Methyl-2-oxopentanoate +L-Glutamate'
'm225'	'Geranyl diphosphate'					'558'	'D-Galactose+NAD+=Galactitol+NADH'
'm226'	'spermine dialdehyde'					'560'	'D-Galactose+NADP+=Galactitol+NADPH'
'm227'	'spermine dialdehyde'					'561'	'Lactose+H2O=D-Glucose+D-Galactose'
'm228'	'spermine dialdehyde'					'565'	'Melibiose+H2O=D-Galactose+D-Glucose'
'm229'	'spermine dialdehyde'					'569'	'Raffinose+H2O=D-Galactose+Sucrose'
'm230'	'2-Acetyl-1-alkyl-sn-glycero-3-phosphocholine'					'573'	'3-beta-D-Galactosyl-sn-glycerol+H2O=D-Galactose+Glycerol'
'm231'	'2-Acetyl-1-alkyl-sn-glycero-3-phosphocholine'					'574'	'3-beta-D-Galactosyl-sn-glycerol+H2O=D-Galactose+Glycerol'
'm232'	'2-Acetyl-1-alkyl-sn-glycero-3-phosphocholine'					'575'	'3-beta-D-Galactosyl-sn-glycerol+H2O=D-Galactose+Glycerol'
'm233'	'Spermine'					'584'	'Isopentenyl diphosphate=Dimethylallyl diphosphate (reversible)'
'm234'	'Chlordecone alcohol'					'585'	'IMP+H2O=Inosine+Orthophosphate'
'm235'	'4-Hydroxy-2-quinolinecarboxylic acid'					'586'	'IMP+H2O=Inosine+Orthophosphate'
'm236'	'Xanthurenic acid'					'587'	'IMP+H2O=Inosine+Orthophosphate'
'm237'	'Xanthurenic acid'					'591'	'IMP+NAD++H2O=Xanthosine 5''-phosphate+NADH+H+'
'm238'	'Naphthalene'					'592'	'IMP+NAD++H2O=Xanthosine 5''-phosphate+NADH+H+'
'm239'	'Naphthalene'					'598'	'IMP+NH3+NADP+=GMP+NADPH+H+'
'm240'	'Naphthalene'					'599'	'IMP+NH3+NADP+=GMP+NADPH+H+'
'm241'	'2-Naphthol'					'602'	'ATP+dADP=ADP+dATP'
'm242'	'(1R,2S)-Naphthalene 1,2-oxide'					'604'	'ATP+dADP=ADP+dATP'
'm243'	'(1R,2S)-Naphthalene 1,2-oxide'					'605'	'dATP+Pyruvate=dADP+Phosphoenolpyruvate'
'm244'	'(1R,2S)-Naphthalene 1,2-oxide'					'606'	'dATP+D-Glucose=dADP+D-Glucose 6-phosphate'
'm245'	'(1R,2S)-Naphthalene 1,2-oxide'					'608'	'dATP+D-Fructose=dADP+D-Fructose 6-phosphate'
'm246'	'(1S,2R)-Naphthalene 1,2-oxide'					'612'	'Acetyl-CoA+Putrescine=CoA+N-Acetylputrescine'
'm247'	'(1S,2R)-Naphthalene 1,2-oxide'					'614'	'Carnosine+H2O=beta-Alanine+L-Histidine'
'm248'	'(1S,2R)-Naphthalene 1,2-oxide'					'617'	'L-Histidine=Urocanate+NH3'
'm249'	'(1S,2R)-Naphthalene 1,2-oxide'					'618'	'Butanoyl-CoA+NAD+=Crotonoyl-CoA+NADH+H+'
'm250'	'Naphthalene-1,2-diol'					'619'	'Butanoyl-CoA+FAD=FADH2+Crotonoyl-CoA'
'm251'	'Indole-3-acetaldehyde'					'621'	'Acetyl-CoA+Butanoyl-CoA=CoA+3-Oxohexanoyl-CoA'
'm252'	'Indole-3-acetaldehyde'					'623'	'1L-myo-Inositol 1-phosphate+H2O=myo-Inositol+Orthophosphate'
'm253'	'Indole-3-acetate'					'624'	'myo-Inositol 4-phosphate+H2O=myo-Inositol+Orthophosphate'
'm254'	'Indole-3-acetate'					'625'	'1D-myo-Inositol 3-phosphate+H2O=myo-Inositol+Orthophosphate'
'm255'	'5-Hydroxyindoleacetaldehyde'					'629'	'Reduced ferredoxin+NADP+=Oxidized ferredoxin+NADPH+H+'
'm256'	'5-Hydroxyindoleacetaldehyde'					'633'	'UDP-D-galactose+N-Acetyl-D-glucosamine=UDP +N-Acetyllactosamine'
'm257'	'5-Hydroxyindoleacetate'					'634'	'UDP-D-galactose+N-Acetyl-D-glucosamine=UDP +N-Acetyllactosamine'
'm258'	'5-Hydroxyindoleacetate'					'635'	'UDP-D-galactose+N-Acetyl-D-glucosamine=UDP +N-Acetyllactosamine'
'm259'	'4-(2-Aminophenyl)-2,4-dioxobutanoate'					'640'	'3-Methyl-2-oxobutanoic acid+CoA+NAD+=2-Methylpropanoyl-CoA +CO2+NADH'
'm260'	'4-(2-Amino-3-hydroxyphenyl)-2,4-dioxobutanoate'					'641'	'L-Valine+2-Oxoglutarate=3-Methyl-2-oxobutanoic acid +L-Glutamate'
'm261'	'4-(2-Amino-3-hydroxyphenyl)-2,4-dioxobutanoate'					'642'	'L-Valine+2-Oxoglutarate=3-Methyl-2-oxobutanoic acid +L-Glutamate'
'm262'	'L-Tryptophan'					'644'	'5,10-Methylenetetrahydrofolate+NAD+ ST = LT 5,10-Methenyltetrahydrofolate+NADH'
'm263'	'L-Tryptophan'					'646'	'5,10-Methylenetetrahydrofolate+NADP+ ST = LT 5,10-Methenyltetrahydrofolate+NADPH'
'm264'	'L-Tryptophan'					'648'	'Glycine+Tetrahydrofolate+NAD+=5,10-Methylenetetrahydrofolate+ NH3+CO2+NADH+H+'
'm265'	'5-Hydroxy-L-tryptophan'					'651'	'GMP+H2O=Guanosine+Orthophosphate'
'm266'	'5-Hydroxytryptophan'					'652'	'GMP+H2O=Guanosine+Orthophosphate'
'm267'	'L-Formylkynurenine'					'653'	'GMP+H2O=Guanosine+Orthophosphate'
'm268'	'NAD(P)+'					'654'	'GMP+H2O=Guanosine+Orthophosphate'
'm269'	'Nicotinate D-ribonucleoside'					'662'	'3'',5''-Cyclic GMP+H2O=GMP'
'm270'	'Nicotinate D-ribonucleoside'					'667'	'L-Proline+NAD+=(S)-1-Pyrroline-5-carboxylate+NADH+H+ (reversible)'
'm271'	'NAD(P)H'					'671'	'L-Proline+2-Oxoglutarate+Oxygen=trans-4-Hydroxy-L-proline +Succinate+CO2'
'm272'	'N-Ribosylnicotinamide'					'673'	'Glutathione+L-Amino acid=Cys-Gly+(5-L-Glutamyl)-L-amino acid'
'm273'	'nicotinamide riboside'					'675'	'S-Adenosyl-L-methionine+Nicotinamide=S-Adenosyl-L-homocysteine+ 1-Methylnicotinamide'
'm274'	'Nicotinamide D-ribonucleotide'					'677'	'Palmitoyl-CoA+H2O=CoA+Hexadecanoic acid'
'm275'	'Nicotinamide D-ribonucleotide'					'678'	'Palmitoyl-CoA+NADP+=trans-Hexadec-2-enoyl-CoA+NADPH+H+'
'm276'	'Nicotinamide D-ribonucleotide'					'679'	'Palmitoyl-CoA+FAD=trans-Hexadec-2-enoyl-CoA+FADH2'
'm277'	'Nicotinamide D-ribonucleotide'					'681'	'Palmitoyl-CoA+L-Serine=3-Dehydrosphinganine+CoA+CO2'
'm278'	'NMNH'					'684'	'L-Serine+L-Homocysteine=L-Cystathionine+H2O'
'm279'	'5''-Methylthioadenosine'					'686'	'Phosphatidylcholine+H2O=Phosphatidate+Choline'
'm280'	'Nicotinate D-ribonucleotide'					'689'	'Phosphatidylcholine+H2O=Phosphatidate+Choline'
'm281'	'Nicotinate D-ribonucleotide'					'690'	'Phosphatidylcholine+H2O=1-Acyl-sn-glycero-3-phosphocholine +Fatty acid'
'm282'	'Nicotinate D-ribonucleotide'					'691'	'Phosphatidylcholine+H2O=1-Acyl-sn-glycero-3-phosphocholine +Fatty acid'
'm283'	'Nicotinate D-ribonucleotide'					'692'	'Phosphatidylcholine+H2O=1-Acyl-sn-glycero-3-phosphocholine +Fatty acid'
'm284'	'1,2-Diacyl-3-beta-D-galactosyl-sn-glycerol'					'702'	'CDPcholine+1,2-Diacyl-sn-glycerol=CMP+Phosphatidylcholine'
'm285'	'1-Phosphatidyl-D-myo-inositol'					'703'	'Citrate=Isocitrate'
'm286'	'1-Phosphatidyl-D-myo-inositol'					'704'	'Citrate=Isocitrate'
'm287'	'1-Phosphatidyl-D-myo-inositol'					'705'	'Citrate=Isocitrate'
'm288'	'1-Phosphatidyl-D-myo-inositol'					'706'	'Citrate=Isocitrate'
'm289'	'1-Phosphatidyl-D-myo-inositol'					'707'	'Citrate=cis-Aconitate+H2O'
'm290'	'1-Phosphatidyl-1D-myo-inositol 4-phosphate'					'708'	'Citrate=cis-Aconitate+H2O'
'm291'	'1-Phosphatidyl-1D-myo-inositol 4-phosphate'					'709'	'Citrate=cis-Aconitate+H2O'
'm292'	'1-Phosphatidyl-1D-myo-inositol 4-phosphate'					'710'	'Citrate=cis-Aconitate+H2O'
'm293'	'1-Phosphatidyl-1D-myo-inositol 4-phosphate'					'711'	'ATP+D-Mannose=ADP+D-Mannose 6-phosphate'
'm294'	'1-Phosphatidyl-1D-myo-inositol 4-phosphate'					'712'	'ITP+D-Mannose=IDP+D-Mannose 6-phosphate'
'm295'	'1-Phosphatidyl-1D-myo-inositol 3-phosphate'					'715'	'Epimelibiose+H2O=D-Mannose+D-Galactose'
'm296'	'1-Phosphatidyl-1D-myo-inositol 3-phosphate'					'718'	'dATP+D-Mannose=dADP+D-Mannose 6-phosphate'
'm297'	'1-Phosphatidyl-1D-myo-inositol 3-phosphate'					'723'	'Glycerol+Fatty acid=Triacylglycerol'
'm298'	'1-Phosphatidyl-1D-myo-inositol 3-phosphate'					'729'	'(S)-3-Hydroxy-3-methylglutaryl-CoA=Acetyl-CoA+Acetoacetate'
'm299'	'1-phosphatidyl-1D-myo-inositol 5-phosphate'					'731'	'(R)-3-Hydroxybutanoate+NAD+=Acetoacetate+NADH+H+ (reversible)'
'm300'	'N-Acetyl-D-muramoate'					'734'	'Triacylglycerol+H2O=Diacylglycerol+Carboxylate'
'm301'	'N-Acetylneuraminate'					'735'	'Triacylglycerol+H2O=Diacylglycerol+Carboxylate'
'm302'	'1-Phosphatidyl-D-myo-inositol 4,5-bisphosphate'					'738'	'L-Glutamine+Phenylpyruvate=2-Oxoglutaramate+L-Phenylalanine'
'm303'	'1-Phosphatidyl-D-myo-inositol 4,5-bisphosphate'					'739'	'Phenylpyruvate=enol-Phenylpyruvate'
'm304'	'1-Phosphatidyl-D-myo-inositol 4,5-bisphosphate'					'745'	'D-Glycerate+NADP+=Hydroxypyruvate+NADPH+H+'
'm305'	'1-Phosphatidyl-D-myo-inositol 4,5-bisphosphate'					'746'	'Hydroxypyruvate=2-Hydroxy-3-oxopropanoate'
'm306'	'1-Phosphatidyl-D-myo-inositol 4,5-bisphosphate'					'750'	'5''-Methylthioadenosine+Orthophosphate=Adenine +S-Methyl-5-thio-D-ribose 1-phosphate'
'm307'	'1-Phosphatidyl-1D-myo-inositol 3,4-bisphosphate'					'754'	'Xylitol+NADP+=D-Xylose+NADPH+H+ (reversible)'
'm308'	'1-Phosphatidyl-1D-myo-inositol 3,4-bisphosphate'					'755'	'Xylitol+NADP+=D-Xylose+NADPH+H+'
'm309'	'1-Phosphatidyl-1D-myo-inositol 3,4-bisphosphate'					'757'	'Cholesterol+NAD+=Cholesta-5,7-dien-3beta-ol+NADH+H+ (reversible)'
'm310'	'1-Phosphatidyl-1D-myo-inositol 3,4-bisphosphate'					'759'	'Cholesterol+NADPH+H++Oxygen=20alpha-Hydroxycholesterol +NADP++H2O'
'm311'	'1-Phosphatidyl-1D-myo-inositol 3,5-bisphosphate'					'760'	'Cholesterol+NADPH+H++Oxygen=20alpha-Hydroxycholesterol +NADP++H2O'
'm312'	'1-phosphatidyl-1D-myo-inositol 3,4-bisphosphate'					'763'	'Cholesterol+NADP+=Cholesta-5,7-dien-3beta-ol+NADPH+H+'
'm313'	'1-phosphatidyl-1D-myo-inositol 4,5-bisphosphate'					'764'	'Acyl-CoA+Cholesterol=CoA+Cholesterol ester'
'm314'	'N6-(L-1,3-Dicarboxypropyl)-L-lysine'					'765'	'Acyl-CoA+Cholesterol=CoA+Cholesterol ester'
'm315'	'N6-(L-1,3-Dicarboxypropyl)-L-lysine'					'767'	'Cholesterol+Oxygen+NADPH+H+=7alpha-Hydroxycholesterol +NADP++H2O'
'm316'	'CDP-ethanolamine'					'768'	'Cholesterol+Oxygen+NADPH+H+=7alpha-Hydroxycholesterol +NADP++H2O'
'm317'	'CDP-ethanolamine'					'771'	'H2O+beta-D-Glucuronoside=D-Glucuronate+Alcohol'
'm318'	'CDP-ethanolamine'					'775'	'N-Acylsphingosine+H2O=Carboxylate+Sphingosine'
'm319'	'CDP-ethanolamine'					'777'	'N-Acylsphingosine+H2O=Carboxylate+Sphingosine'
'm320'	'N-Acetylneuraminate 9-phosphate'					'778'	'N-Acylsphingosine+H2O=Carboxylate+Sphingosine'
'm321'	'Phosphatidylinositol-3,4,5-trisphosphate'					'780'	'N-Acylsphingosine+H2O=Fatty acid+Sphingosine'
'm322'	'Phosphatidylinositol-3,4,5-trisphosphate'					'781'	'N-Acylsphingosine+H2O=Fatty acid+Sphingosine'
'm323'	'1-phosphatidyl-1D-myo-inositol 3,4,5-trisphosphate'					'783'	'N-Acylsphingosine+H2O=Fatty acid+Sphingosine'
'm324'	'Pantetheine'					'787'	'UDPglucose+N-Acylsphingosine=UDP+Glucosylceramide'
'm325'	'lysyl-proline'					'789'	'Glucosylceramide+H2O=D-Glucose+N-Acylsphingosine'
'm326'	'Pantetheine 4''-phosphate'					'791'	'Glucosylceramide+H2O=D-Glucose+N-Acylsphingosine'
'm327'	'1,4-benzothiazine-o-quinonimine'					'793'	'ATP+3-Phospho-D-glycerate=ADP+3-Phospho-D-glyceroylphosphate (reversible)'
'm328'	'3,4-dihydro-1,4-benzothiazine-3-carboxylate'					'797'	'2,3-Bisphospho-D-glycerate+H2O=3-Phospho-D-glycerate +Orthophosphate'
'm329'	'N-Acetylserotonin'					'799'	'beta-D-Glucose+NAD+=D-Glucono-1,5-lactone+NADH'
'm330'	'5-(S-L-cysteinyl)-dopaquinone'					'800'	'beta-D-Glucose+NADP+=D-Glucono-1,5-lactone+NADPH'
'm331'	'5-S-cysteinyldopa'					'803'	'ATP+dAMP=ADP+dADP'
'm332'	'Acetyl adenylate'					'804'	'ATP+dAMP=ADP+dADP'
'm333'	'Peptidyl-allysyl-peptide'					'805'	'ATP+dAMP=ADP+dADP'
'm334'	'Thiamine'					'814'	'N,N-Dimethylglycine+Acceptor+H2O=Sarcosine+Formaldehyde +Reduced acceptor'
'm335'	'Thiamine'					'815'	'ATP+Thymidine=ADP+dTMP'
'm336'	'2-(S-Glutathionyl)acetyl chloride'					'816'	'dTMP+H2O=Thymidine+Orthophosphate'
'm337'	'S-(Formylmethyl)glutathione'					'818'	'dTMP+H2O=Thymidine+Orthophosphate'
'm338'	'Thiamin diphosphate'					'820'	'dTMP+H2O=Thymidine+Orthophosphate'
'm339'	'Thiamin diphosphate'					'821'	'Thymidine+Orthophosphate=Thymine+2-Deoxy-D-ribose1-phosphate'
'm340'	'Glutathione episulfonium ion'					'822'	'Thymidine+Orthophosphate=Thymine+2-Deoxy-D-ribose1-phosphate'
'm341'	'Thiamin triphosphate'					'825'	'(5Z,8Z,11Z,14Z)-Icosatetraenoic acid+2 Oxygen=Prostaglandin G2'
'm342'	'Peptidyl-L-lysyl-peptide'					'826'	'(5Z,8Z,11Z,14Z)-Icosatetraenoic acid+Oxygen=15(S)-HPETE'
'm343'	'3-Ketolactose'					'830'	'(5Z,8Z,11Z,14Z)-Icosatetraenoic acid+Oxygen=15(S)-HPETE'
'm344'	'S-Succinyldihydrolipoamide'					'831'	'(5Z,8Z,11Z,14Z)-Icosatetraenoic acid+Oxygen=5(S)-HPETE'
'm345'	'4(R)-hydroxy-dodec-6Z-enoate'					'833'	'(5Z,8Z,11Z,14Z)-Icosatetraenoic acid+Oxygen=12(S)-HPETE'
'm346'	'Sucrose'					'837'	'ATP+beta-D-Glucose=ADP+beta-D-Glucose 6-phosphate'
'm347'	'Lactose'					'839'	'alpha-D-Glucose=beta-D-Glucose'
'm348'	'Lactose'					'842'	'D-Sedoheptulose 7-phosphate +(2R)-2-Hydroxy-3-(phosphonooxy)-propanal=D-Ribose 5-phosphate +D-Xylulose 5-phosphate (reversible)'
'm349'	'Lactose'					'845'	'4-Aminobutanoate+2-Oxoglutarate=Succinate semialdehyde +L-Glutamate (reversible)'
'm350'	'alpha-Maltose'					'846'	'4-Aminobutanoate+2-Oxoglutarate=Succinate semialdehyde +L-Glutamate'
'm351'	'Epimelibiose'					'847'	'4-Methyl-2-oxopentanoate+CoA+NAD+=3-Methylbutanoyl-CoA+CO2+ NADH'
'm352'	'(R)-4''-Phosphopantothenoyl-L-cysteine'					'848'	'ATP+10-Formyltetrahydrofolate+L-Glutamate=ADP +Orthophosphate+10-Formyltetrahydrofolyl L-glutamate'
'm353'	'6-(alpha-D-Glucosaminyl)-1D-myo-inositol'					'849'	'ATP+10-Formyltetrahydrofolate+L-Glutamate=ADP +Orthophosphate+10-Formyltetrahydrofolyl L-glutamate'
'm354'	'S-(2-Methylpropanoyl)-dihydrolipoamide'					'850'	'5,10-Methenyltetrahydrofolate+H2O=10-Formyltetrahydrofolate +H+'
'm355'	'Lactose 6-phosphate'					'851'	'5,10-Methenyltetrahydrofolate+H2O=10-Formyltetrahydrofolate +H+'
'm356'	'Melibiitol'					'852'	'Dimethylallyl diphosphate+Isopentenyl diphosphate ST = LT Pyrophosphate+Geranyl diphosphate'
'm357'	'N1-Acetylspermine'					'855'	'dCMP+H2O=Deoxycytidine+Orthophosphate'
'm358'	'Propionyladenylate'					'856'	'dCMP+H2O=Deoxycytidine+Orthophosphate'
'm359'	'1-(5''-Phosphoribosyl)-5-amino-4-(N-succinocarboxamide)-imidazole'					'857'	'dCMP+H2O=Deoxycytidine+Orthophosphate'
'm360'	'(R)-S-Lactoylglutathione'					'862'	'ATP+Deoxycytidine=ADP+dCMP'
'm361'	'[Dihydrolipoyllysine-residue succinyltransferase] S-glutaryldihydrolipoyllysine'					'866'	'Lactose+H2O=alpha-D-Glucose+D-Galactose'
'm362'	'S-(2-Methylbutanoyl)-dihydrolipoamide'					'867'	'Lactose+H2O=alpha-D-Glucose+D-Galactose'
'm363'	'S-(3-Methylbutanoyl)-dihydrolipoamide'					'870'	'Lactose 6-phosphate+H2O=Lactose+Orthophosphate'
'm364'	'N6-(1,2-Dicarboxyethyl)-AMP'					'878'	'Dihydrolipoamide+NAD+=Lipoamide+NADH'
'm365'	'Ubiquinone'					'879'	'Pyruvate+Lipoamide=S-Acetyldihydrolipoamide+CO2'
'm366'	'Ubiquinone'					'881'	'3-Methyl-2-oxobutanoic acid+Lipoamide ST = LT S-(2-Methylpropanoyl)-dihydrolipoamide+CO2'
'm367'	'CDP-diacylglycerol'					'883'	'4-Methyl-2-oxopentanoate+Lipoamide ST = LT S-(3-Methylbutanoyl)-dihydrolipoamide+CO2'
'm368'	'CDP-diacylglycerol'					'897'	'D-Glyceraldehyde+NAD++H2O=D-Glycerate+NADH+H+'
'm369'	'S-Adenosyl-L-homocysteine'					'898'	'D-Glyceraldehyde+NAD++H2O=D-Glycerate+NADH+H+'
'm370'	'S-Adenosyl-L-homocysteine'					'899'	'D-Glyceraldehyde+NAD++H2O=D-Glycerate+NADH+H+'
'm371'	'Ubiquinol'					'900'	'D-Glyceraldehyde+NAD++H2O=D-Glycerate+NADH+H+'
'm372'	'Ubiquinol'					'902'	'L-Arabitol+NAD+=L-Arabinose+NADH'
'm373'	'6(R)-hydroxy-tetradeca-2E,4E,8Z-trienoate'					'904'	'L-Arabitol+NADP+=L-Arabinose+NADPH'
'm374'	'6(S)-hydroxy-tetradeca-2E,4E,8Z-trienoate'					'906'	'Hypoxanthine+NAD++H2O=Xanthine+NADH'
'm375'	'UDP-D-xylose'					'907'	'Hypoxanthine+Oxygen+H2O=Xanthine+H2O2'
'm376'	'UDP-D-xylose'					'908'	'Inosine+H2O=Hypoxanthine+D-Ribose'
'm377'	'beta-D-Glucuronosyl-(1-_LT_4)-N-acetyl-alpha-D-glucosaminylproteoglycan'					'910'	'(3S)-3-Hydroxyacyl-CoA+NAD+=3-Oxoacyl-CoA+NADH'
'm378'	'2-(alpha-Hydroxyethyl)thiamine diphosphate'					'912'	'ATP+alpha-D-Glucose=ADP+alpha-D-Glucose 6-phosphate'
'm379'	'2-(alpha-Hydroxyethyl)thiamine diphosphate'					'916'	'Starch+H2O=alpha-D-Glucose+Starch'
'm380'	'S-Adenosylmethioninamine'					'918'	'Dextrin+H2O=alpha-D-Glucose+Dextrin'
'm381'	'6(R)-hydroxy-tetradeca-2E,8Z-dienoate'					'924'	'CTP+Phosphatidate=Pyrophosphate+CDPdiacylglycerol'
'm382'	'6(R)-hydroxy-tetradeca-4E,8Z-dienoate'					'925'	'CTP+Phosphatidate=Pyrophosphate+CDPdiacylglycerol'
'm383'	'6(S)-hydroxy-tetradeca-2E,8Z-dienoate'					'935'	'Tetrahydrobiopterin+L-Tryptophan+Oxygen ST = LT 5-Hydroxy-L-tryptophan+Dihydrobiopterin+H2O'
'm384'	'6(S)-hydroxy-tetradeca-4E,8Z-dienoate'					'939'	'D-Sedoheptulose 7-phosphate +(2R)-2-Hydroxy-3-(phosphonooxy)-propanal=D-Erythrose 4-phosphate+ D-Fructose 6-phosphate'
'm385'	'3-oxo-6(R)-hydroxy-tetradec-8-cis-enoate'					'942'	'beta-D-Fructose 6-phosphate +(2R)-2-Hydroxy-3-(phosphonooxy)-propanal=D-Erythrose 4-phosphate+ D-Xylulose 5-phosphate (reversible)'
'm386'	'3-oxo-6(S)-hydroxy-tetradec-8Z-enoate'					'944'	'5alpha-Androstane-3,17-dione+Acceptor=Androst-4-ene-3,17-dione+ Reduced acceptor (reversible)'
'm387'	'N-Acetylmuramoyl-Ala'					'946'	'5beta-Androstane-3,17-dione+Acceptor=Androst-4-ene-3,17-dione+ Reduced acceptor (reversible)'
'm388'	'beta-D-Galactosyl-1,3-N-acetyl-alpha-D-galactosaminyl-R'					'949'	'3beta-Hydroxyandrost-5-en-17-one+NAD+=Androst-4-ene-3,17-dione+ NADH+H+ (reversible)'
'm389'	'beta-D-Galactosyl-1,3-N-acetyl-alpha-D-galactosaminyl-R'					'950'	'3beta-Hydroxyandrost-5-en-17-one+NADP+ ST = LT Androst-4-ene-3,17-dione+NADPH+H+'
'm390'	'beta-D-Galactosyl-1,3-N-acetyl-alpha-D-galactosaminyl-R'					'951'	'3beta-Hydroxyandrost-5-en-17-one+NADP+ ST = LT Androst-4-ene-3,17-dione+NADPH+H+'
'm391'	'N-Acetyllactosamine'					'957'	'ATP+dGDP=ADP+dGTP'
'm392'	'N-Acetyllactosamine'					'958'	'dGTP+Pyruvate=dGDP+Phosphoenolpyruvate'
'm393'	'N-Acetyllactosamine'					'959'	'ATP+Propanoyl-CoA+HCO3-=ADP+Orthophosphate +(S)-2-Methyl-3-oxopropanoyl-CoA'
'm394'	'Glycoprotein N-acetyl-D-glucosaminyl-phospho-D-mannose'					'962'	'(S)-Dihydroorotate+Oxygen=Orotate+H2O2'
'm395'	'3(S),6(R)-dihydroxy-tetradec-8Z-enoate'					'963'	'(S)-Dihydroorotate+Oxygen=Orotate+H2O2'
'm396'	'3(S),6(S)-dihydroxy-tetradec-8Z-enoate'					'965'	'Uridine+Orthophosphate=Uracil+alpha-D-Ribose 1-phosphate'
'm397'	'CDP-choline'					'967'	'Uridine+Orthophosphate=Uracil+alpha-D-Ribose 1-phosphate'
'm398'	'CDP-choline'					'978'	'CTP+Choline phosphate=Pyrophosphate+CDPcholine'
'm399'	'N1,N12-Diacetylspermine'					'982'	'CDPcholine+N-Acylsphingosine=CMP+Sphingomyelin'
'm400'	'N1,N12-Diacetylspermine'					'985'	'Isocitrate+NADP+=Oxalosuccinate+NADPH+H+'
'm401'	'O-(4-Hydroxy-3,5-diidophenyl)-3,5-diiodo-L-tyrosine'					'986'	'Isocitrate=cis-Aconitate+H2O'
'm402'	'O-(4-Hydroxy-3,5-diidophenyl)-3,5-diiodo-L-tyrosine'					'987'	'Isocitrate=cis-Aconitate+H2O'
'm403'	'Triiodothyronine'					'988'	'Isocitrate=cis-Aconitate+H2O'
'm404'	'3,3'',5'' - triiodothyronine'					'989'	'Isocitrate=cis-Aconitate+H2O'
'm405'	'3,3'',5'' - triiodothyronine'					'991'	'Xylitol+NADP+=L-Xylulose+NADPH'
'm406'	'3,3''-diiodo-L-thyronine 4''-O-sulfate'					'995'	'Sphingosine+ATP=Sphingosine 1-phosphate+ADP'
'm407'	'3,3''-diiodo-L-thyronine 4''-O-sulfate'					'996'	'Thiosulfate+Hydrogen cyanide=Sulfite+Thiocyanate'
'm408'	'3,3''-diiodo-L-thyronine 4''-O-sulfate'					'997'	'2-Oxoadipate+CoA+NAD+=Glutaryl-CoA+CO2+NADH+H+'
'm409'	'3'',5''-diiodo-L-thyronine 4''-O-sulfate'					'998'	'L-2-Aminoadipate+2-Oxoglutarate=2-Oxoadipate+L-Glutamate (reversible)'
'm410'	'3,3''-diiodo-L-thyronine'					'999'	'2-Oxoadipate+Lipoamide=S-Glutaryldihydrolipoamide+CO2'
'm411'	'3,3''-diiodo-L-thyronine'					'1002'	'L-Kynurenine+2-Oxoglutarate ST = LT 4-(2-Aminophenyl)-2,4-dioxobutanoate+L-Glutamate'
'm412'	'3,3''-diiodo-L-thyronine'					'1010'	'ITP+D-Glucosamine=IDP+D-Glucosamine 6-phosphate'
'm413'	'3'',5''-diiodo-L-thyronine'					'1012'	'dATP+D-Glucosamine=dADP+D-Glucosamine 6-phosphate'
'm414'	'3''-monoiodo-L-thyronine 4''-O-sulfate'					'1014'	'ATP+Deoxyguanosine=ADP+dGMP'
'm415'	'3''-monoiodo-L-thyronine'					'1015'	'dGMP+H2O=Deoxyguanosine+Orthophosphate'
'm416'	'gama-carboxyethyl-hydroxychroman'					'1016'	'dGMP+H2O=Deoxyguanosine+Orthophosphate'
'm417'	'gama-carboxyethyl-hydroxychroman'					'1018'	'dGMP+H2O=Deoxyguanosine+Orthophosphate'
'm418'	'UDP-glucuronate'					'1019'	'Deoxyguanosine+Orthophosphate=Guanine+2-Deoxy-D-ribose1-phosphate'
'm419'	'UDP-glucuronate'					'1020'	'Deoxyguanosine+Orthophosphate=Guanine+2-Deoxy-D-ribose1-phosphate'
'm420'	'S-Adenosyl-L-methionine'					'1021'	'(S)-3-Hydroxybutanoyl-CoA+NAD+=Acetoacetyl-CoA+NADH'
'm421'	'S-Adenosyl-L-methionine'					'1023'	'(S)-3-Hydroxy-3-methylglutaryl-CoA+CoA=Acetyl-CoA+H2O +Acetoacetyl-CoA'
'm422'	'S-Adenosyl-L-methionine'					'1024'	'4-Aminobutanal+NADP++H2O=4-Aminobutanoate+NADPH'
'm423'	'ADP-ribose'					'1025'	'4-Aminobutanal+NADP++H2O=4-Aminobutanoate+NADPH'
'm424'	'ADP-ribose'					'1031'	'Geranyl diphosphate+Isopentenyl diphosphate=Pyrophosphate +trans,trans-Farnesyl diphosphate'
'm425'	'UDP-glucose'					'1032'	'Thioredoxin+NADP+=Oxidized thioredoxin+NADPH+H+'
'm426'	'UDP-glucose'					'1033'	'Thioredoxin+NADP+=Oxidized thioredoxin+NADPH+H+'
'm427'	'UDP-glucose'					'1034'	'Thioredoxin+NADP+=Oxidized thioredoxin+NADPH+H+'
'm428'	'UDP-D-galactose'					'1036'	'dADP+Oxidized thioredoxin+H2O=Thioredoxin+ADP (reversible)'
'm429'	'UDP-D-galactose'					'1037'	'dADP+Oxidized thioredoxin+H2O=Thioredoxin+ADP'
'm430'	'UDP-D-galactose'					'1039'	'dUDP+Oxidized thioredoxin+H2O=Thioredoxin+UDP'
'm431'	'acylglucosaminylphosphatidylinositol'					'1040'	'dGDP+Oxidized thioredoxin+H2O=GDP+Thioredoxin (reversible)'
'm432'	'trans,trans-Farnesyl diphosphate'					'1041'	'dGDP+Oxidized thioredoxin+H2O=GDP+Thioredoxin'
'm433'	'trans,trans-Farnesyl diphosphate'					'1044'	'dCDP+Oxidized thioredoxin+H2O=Thioredoxin+CDP'
'm434'	'3''-carboxy-alpha-chromanol'					'1048'	'D-Glucono-1,5-lactone 6-phosphate+H2O=6-Phospho-D-gluconate'
'm435'	'3''-carboxy-alpha-chromanol'					'1050'	'3-Hydroxy-2-methylpropanoate+NAD+=2-Methyl-3-oxopropanoate +NADH'
'm436'	'3''-carboxy-alpha-chromanol'					'1053'	'Phosphatidylethanolamine+H2O=Ethanolamine+Phosphatidate'
'm437'	'GDP-4-dehydro-6-deoxy-D-mannose'					'1056'	'Phosphatidylethanolamine+H2O=Ethanolamine+Phosphatidate'
'm438'	'8(R)-hydroxy-hexadeca-2E,4E,6E,10Z-tetraenoate'					'1057'	'Phosphatidylethanolamine+H2O ST = LT 1-Acyl-sn-glycero-3-phosphoethanolamine+Fatty acid'
'm439'	'8(S)-hydroxy-hexadeca-2E,4E,6E,10Z-tetraenoate'					'1058'	'Phosphatidylethanolamine+H2O ST = LT 1-Acyl-sn-glycero-3-phosphoethanolamine+Fatty acid'
'm440'	'3-Carboxy-1-hydroxypropyl-ThPP'					'1059'	'Phosphatidylethanolamine+H2O ST = LT 1-Acyl-sn-glycero-3-phosphoethanolamine+Fatty acid'
'm441'	'GDP-L-fucose'					'1061'	'Phosphatidylserine=Phosphatidylethanolamine+CO2'
'm442'	'GDP-L-fucose'					'1062'	'S-Adenosyl-L-methionine+Phosphatidylethanolamine ST = LT S-Adenosyl-L-homocysteine+Phosphatidyl-N-methylethanolamine'
'm443'	'GDP-L-fucose'					'1063'	'S-Adenosyl-L-methionine+Phosphatidylethanolamine ST = LT S-Adenosyl-L-homocysteine+Phosphatidyl-N-methylethanolamine'
'm444'	'GDP-mannose'					'1066'	'Acetyl-CoA+D-Glucosamine 6-phosphate=CoA +N-Acetyl-D-glucosamine 6-phosphate'
'm445'	'10,11-epoxy-(4Z,7Z)-hexadecadienoic acid'					'1067'	'N-Acetyl-D-glucosamine 6-phosphate+H2O=D-Glucosamine6-phosphate+Acetate'
'm446'	'8(R)-hydroxy-hexadeca-2E,6E,10Z-trienoate'					'1068'	'trans,trans-Farnesyl diphosphate+Isopentenyl diphosphate ST = LT Pyrophosphate+Geranylgeranyl diphosphate'
'm447'	'8(R)-hydroxy-hexadeca-4E,6E,10Z-trienoate'					'1080'	'(S)-3-Hydroxy-3-methylglutaryl-CoA=3-Methylglutaconyl-CoA+H2O'
'm448'	'8(S)-hydroxy-hexadeca-2E,6E,10Z-trienoate'					'1081'	'N-Acetyl-D-glucosamine 6-phosphate=N-Acetyl-D-glucosamine1-phosphate'
'm449'	'8(S)-hydroxy-hexadeca-4E,6E-10Z-trienoate'					'1082'	'dAMP+H2O=Deoxyadenosine+Orthophosphate'
'm450'	'3-oxo-8(R)-hydroxy-hexadeca-6E,10Z-dienoate'					'1083'	'dAMP+H2O=Deoxyadenosine+Orthophosphate'
'm451'	'3-oxo-8(S)-hydroxy-hexadeca-6E,10Z-dienoate'					'1084'	'dAMP+H2O=Deoxyadenosine+Orthophosphate'
'm452'	'3(S),8(R)-dihydroxy-6E,10Z-hexadecadienoate'					'1086'	'ATP+dGMP=ADP+dGDP (reversible)'
'm453'	'3(S),8(S)-dihydroxy-6E,10Z-hexadecadienoate'					'1089'	'dTDP+H2O=dTMP+Orthophosphate'
'm454'	'palmitoleate'					'1090'	'dTDP+H2O=dTMP+Orthophosphate'
'm455'	'palmitoleate'					'1091'	'dTDP+H2O=dTMP+Orthophosphate'
'm456'	'Hexadecanal'					'1093'	'dTDP+H2O=dTMP+Orthophosphate'
'm457'	'Hexadecanal'					'1096'	'ATP+dTDP=ADP+dTTP'
'm458'	'Hexadecanoic acid'					'1099'	'dTTP+H2O=dTDP+Orthophosphate'
'm459'	'Hexadecanoic acid'					'1100'	'dTTP+H2O=dTDP+Orthophosphate'
'm460'	'Riboflavin'					'1101'	'dTTP+H2O=dTDP+Orthophosphate'
'm461'	'Riboflavin'					'1102'	'dTTP+H2O=dTDP+Orthophosphate'
'm462'	'FMN'					'1105'	'ATP+dUMP=ADP+dUDP'
'm463'	'FMN'					'1107'	'ATP+Deoxyuridine=ADP+dUMP'
'm464'	'Cocaine'					'1109'	'dUTP+H2O=dUMP+Pyrophosphate'
'm465'	'12-oxo-(5Z,8Z,10E)-heptadecatrienoic acid'					'1110'	'dUTP+H2O=dUMP+Pyrophosphate'
'm466'	'Digalactosyl-diacylglycerol'					'1113'	'Xanthine+NAD++H2O=Urate+NADH'
'm467'	'UDP-N-acetyl-D-glucosamine'					'1115'	'Xanthine+H2O+Oxygen=Urate+H2O2'
'm468'	'UDP-N-acetyl-D-glucosamine'					'1116'	'Starch+H2O=Dextrin+Starch'
'm469'	'UDP-N-acetyl-D-glucosamine'					'1117'	'Starch+H2O=Dextrin+Starch'
'm470'	'UDP-N-acetyl-D-glucosamine'					'1118'	'Starch+H2O=Amylose+alpha-D-Glucose (reversible)'
'm471'	'UDP-N-acetyl-D-galactosamine'					'1119'	'Amylose=Starch (reversible)'
'm472'	'UDP-N-acetyl-D-mannosamine'					'1132'	'Ubiquinone+Succinate=Ubiquinol+Fumarate'
'm473'	'12S-HHT'					'1133'	'Ubiquinone+Succinate=Ubiquinol+Fumarate'
'm474'	'6-(alpha-D-Glucosaminyl)-1-phosphatidyl-1D-myo-inositol'					'1135'	'Ubiquinol=Ubiquinone+2 H+'
'm475'	'6-(alpha-D-Glucosaminyl)-1-phosphatidyl-1D-myo-inositol'					'1139'	'Tryptamine+H2O+Oxygen=Indole-3-acetaldehyde+NH3+H2O2'
'm476'	'6-(alpha-D-Glucosaminyl)-1-phosphatidyl-1D-myo-inositol'					'1147'	'L-Isoleucine+2-Oxoglutarate=3-Methyl-2-oxopentanoate +L-Glutamate'
'm477'	'estrone-3,4-quinone'					'1149'	'L-Isoleucine+2-Oxoglutarate=(S)-3-Methyl-2-oxopentanoic acid +L-Glutamate'
'm478'	'estrone-3,4-quinone'					'1150'	'L-Isoleucine+2-Oxoglutarate=(S)-3-Methyl-2-oxopentanoic acid +L-Glutamate'
'm479'	'estrone-3,4-quinone'					'1153'	'L-Pipecolate+Oxygen=2,3,4,5-Tetrahydropyridine-2-carboxylate +H2O2'
'm480'	'estrone-3,4-semiquinone'					'1154'	'L-Pipecolate+FAD=FADH2 +2,3,4,5-Tetrahydropyridine-2-carboxylate (reversible)'
'm481'	'estrone-3,4-semiquinone'					'1157'	'20alpha-Hydroxy-4-pregnen-3-one+NAD+=Progesterone+NADH (reversible)'
'm482'	'estrone-2,3-semiquinone'					'1159'	'20alpha-Hydroxy-4-pregnen-3-one+NADP+=Progesterone+NADPH (reversible)'
'm483'	'estrone-2,3-semiquinone'					'1165'	'5beta-Pregnane-3,20-dione+Acceptor=Progesterone+Reducedacceptor'
'm484'	'Estrone'					'1166'	'5beta-Pregnane-3,20-dione+Acceptor=Progesterone+Reducedacceptor'
'm485'	'Estrone'					'1167'	'5beta-Pregnane-3,20-dione+Acceptor=Progesterone+Reducedacceptor'
'm486'	'Estrone'					'1168'	'Pregnenolone+NAD+=Progesterone+NADH+H+'
'm487'	'Estrone'					'1169'	'Pregnenolone+NAD+=Progesterone+NADH+H+'
'm488'	'2-Hydroxyestrone'					'1176'	'Progesterone+NADPH+H+=5beta-Pregnane-3,20-dione+NADP+'
'm489'	'2-Hydroxyestrone'					'1178'	'Stearoyl-CoA+Reduced acceptor+Oxygen=Oleoyl-CoA+Acceptor +2 H2O'
'm490'	'2-Hydroxyestrone'					'1183'	'Phosphatidate+H2O=1,2-Diacyl-sn-glycerol+Orthophosphate'
'm491'	'16alpha-Hydroxyestrone'					'1184'	'Phosphatidate+H2O=1,2-Diacyl-sn-glycerol+Orthophosphate'
'm492'	'16alpha-Hydroxyestrone'					'1185'	'Phosphatidate+H2O=1,2-Diacyl-sn-glycerol+Orthophosphate'
'm493'	'4-hydroxyestrone'					'1187'	'ATP+1,2-Diacyl-sn-glycerol=ADP+Phosphatidate'
'm494'	'4-hydroxyestrone'					'1189'	'Phosphatidate+CoA=1-Acyl-sn-glycerol 3-phosphate+Acyl-CoA'
'm495'	'4-hydroxyestrone'					'1190'	'Phosphatidate+CoA=1-Acyl-sn-glycerol 3-phosphate+Acyl-CoA'
'm496'	'17beta-estradiol-3,4-quinone'					'1191'	'Phosphatidate+CoA=1-Acyl-sn-glycerol 3-phosphate+Acyl-CoA'
'm497'	'17beta-estradiol-3,4-quinone'					'1197'	'Triacylglycerol+H2O=1,2-Diacyl-sn-glycerol+Fatty acid'
'm498'	'17beta-estradiol-3,4-quinone'					'1198'	'Triacylglycerol+H2O=1,2-Diacyl-sn-glycerol+Fatty acid'
'm499'	'17beta-estradiol-3,4-semiquinone'					'1200'	'Triacylglycerol+CoA=1,2-Diacyl-sn-glycerol+Acyl-CoA'
'm500'	'17beta-estradiol-3,4-semiquinone'					'1202'	'Prostaglandin H2=Prostaglandin E2'
'm501'	'17beta-estradiol-2,3-semiquinone'					'1203'	'Prostaglandin H2=Prostaglandin E2'
'm502'	'17beta-estradiol-2,3-semiquinone'					'1204'	'Prostaglandin H2 ST = LT (5Z,13E)-(15S)-9alpha,15-Dihydroxy-11-oxoprosta-5,13-dienoate'
'm503'	'Estrone 3-sulfate'					'1205'	'Prostaglandin H2 ST = LT (5Z,13E)-(15S)-9alpha,15-Dihydroxy-11-oxoprosta-5,13-dienoate'
'm504'	'Estrone 3-sulfate'					'1206'	'Prostaglandin H2 ST = LT (5Z,13E)-(15S)-9alpha,15-Dihydroxy-11-oxoprosta-5,13-dienoate'
'm505'	'Estrone 3-sulfate'					'1207'	'Prostaglandin H2=Prostaglandin I2'
'm506'	'Estrone 3-sulfate'					'1208'	'Prostaglandin H2=Prostaglandin I2'
'm507'	'Estrone 3-sulfate'					'1211'	'2-Amino-3-oxoadipate=5-Aminolevulinate+CO2'
'm508'	'5-S-glutathionyl-aminochrome reduced'					'1219'	'5-Formyltetrahydrofolate=5,10-Methenyltetrahydrofolate+H2O'
'm509'	'Estradiol'					'1220'	'ATP+5-Formyltetrahydrofolate=ADP+Orthophosphate +5,10-Methenyltetrahydrofolate'
'm510'	'Estradiol'					'1223'	'5-Formiminotetrahydrofolate=5,10-Methenyltetrahydrofolate+NH3'
'm511'	'Estriol'					'1225'	'N6-(L-1,3-Dicarboxypropyl)-L-lysine+NAD++H2O=L-Glutamate +L-2-Aminoadipate 6-semialdehyde+NADH+H+'
'm512'	'Estriol'					'1226'	'Nicotinamide D-ribonucleotide+H2O=N-Ribosylnicotinamide +Orthophosphate'
'm513'	'2-Hydroxyestradiol'					'1231'	'ATP+dCDP=ADP+dCTP'
'm514'	'2-Hydroxyestradiol'					'1235'	'ATP+dUDP=ADP+dUTP'
'm515'	'2-Hydroxyestradiol'					'1240'	'3''-Phosphoadenylyl sulfate+Estrone=Adenosine3'',5''-bisphosphate+Estrone 3-sulfate'
'm516'	'4-hydroxy-17beta-estradiol'					'1241'	'Estradiol-17beta+NAD+=Estrone+NADH+H+ (reversible)'
'm517'	'4-hydroxy-17beta-estradiol'					'1242'	'Estradiol-17beta+NAD+=Estrone+NADH+H+'
'm518'	'4-hydroxy-17beta-estradiol'					'1244'	'Estradiol-17beta+NADP+=Estrone+NADPH+H+'
'm519'	'omega-carboxy-trinor-leukotriene B4'					'1251'	'dCTP+Cytidine=dCDP+CMP'
'm520'	'5-S-glutathionyl-dopamine'					'1255'	'Tyramine+H2O+Oxygen=4-Hydroxyphenylacetaldehyde+NH3+H2O2'
'm521'	'3-oxo-10(R)-hydroxy-octadeca-6E,8E,12Z-trienoate'					'1256'	'Tyramine+H2O+Oxygen=4-Hydroxyphenylacetaldehyde+NH3+H2O2'
'm522'	'3-oxo-10(R)-hydroxy-octadeca-6E,8E,12Z-trienoate'					'1261'	'Tyramine+Oxygen+NADH+H+=4-(2-Aminoethyl)-1,2-benzenediol +NAD++H2O'
'm523'	'3-oxo-10(S)-hydroxy-octadeca-6E,8E,12Z-trienoate'					'1283'	'Sphinganine 1-phosphate=Ethanolamine phosphate+Hexadecanal'
'm524'	'3-oxo-10(S)-hydroxy-octadeca-6E,8E,12Z-trienoate'					'1284'	'Sphinganine 1-phosphate=Ethanolamine phosphate+Hexadecanal'
'm525'	'12,13-epoxy-(6Z,9Z)-octadecadienoic acid'					'1293'	'Androsterone+NADP+=5alpha-Androstane-3,17-dione+NADPH (reversible)'
'm526'	'3(S),10(R)-OH-octadeca-6-trans-4,12-cis-trienoate'					'1300'	'Deoxyuridine+Orthophosphate=Uracil+2-Deoxy-D-ribose1-phosphate'
'm527'	'(6Z,9Z,12Z)-Octadecatrienoic acid'					'1306'	'ATP+Pyridoxamine=ADP+Pyridoxamine phosphate'
'm528'	'(9Z,12Z,15Z)-Octadecatrienoic acid'					'1307'	'17beta-Hydroxyandrostan-3-one+Acceptor=Testosterone+Reducedacceptor (reversible)'
'm529'	'13-hydroxy-(9Z,11E)-octadecadienoate'					'1309'	'5beta-Dihydrotestosterone+Acceptor=Testosterone+Reducedacceptor (reversible)'
'm530'	'13-hydroxy-(9Z,11E)-octadecadienoate'					'1310'	'5beta-Dihydrotestosterone+Acceptor=Testosterone+Reducedacceptor (reversible)'
'm531'	'9-hydroxyoctadecadienoate'					'1312'	'Testosterone+H++NADH=Androst-5-ene-3beta,17beta-diol+NAD+'
'm532'	'9-hydroxyoctadecadienoate'					'1316'	'Testosterone+H++NADPH=Androst-5-ene-3beta,17beta-diol +NADP+'
'm533'	'9-hydroxyoctadecadienoate'					'1320'	'Homogentisate+Oxygen=4-Maleylacetoacetate'
'm534'	'Raffinose'					'1326'	'(R)-S-Lactoylglutathione=Glutathione+Methylglyoxal'
'm535'	'Maltotriose'					'1328'	'Lactaldehyde+NAD+=Methylglyoxal+NADH+H+'
'm536'	'D-Gal alpha 1-_LT_6D-Gal alpha 1-_LT_6D-Glucose'					'1329'	'L-Noradrenaline+H2O+Oxygen=3,4-Dihydroxymandelaldehyde+NH3+ H2O2'
'm537'	'Linoleate'					'1339'	'Sphingomyelin+H2O=N-Acylsphingosine+Choline phosphate'
'm538'	'Linoleate'					'1341'	'Sphingomyelin+H2O=N-Acylsphingosine+Choline phosphate'
'm539'	'Linoleate'					'1343'	'4-Aminobutanal+NAD++H2O=4-Aminobutanoate+NADH+H+'
'm540'	'9(10)-EpOME'					'1344'	'4-Aminobutanal+NAD++H2O=4-Aminobutanoate+NADH+H+'
'm541'	'12(13)-EpOME'					'1347'	'Deoxyadenosine+Orthophosphate=Adenine+2-Deoxy-D-ribose1-phosphate'
'm542'	'(9Z,11E)-(13S)-13-Hydroperoxyoctadeca-9,11-dienoic acid'					'1348'	'Betaine aldehyde+FAD+H2O=FADH2+Betaine'
'm543'	'(9Z,11E)-(13S)-13-Hydroperoxyoctadeca-9,11-dienoic acid'					'1351'	'Acetyl-CoA+Dihydrolipoamide=CoA+S-Acetyldihydrolipoamide'
'm544'	'9(S)-HPODE'					'1353'	'Succinyl-CoA+Dihydrolipoamide=CoA+S-Succinyldihydrolipoamide'
'm545'	'9(S)-HPODE'					'1355'	'Glutaryl-CoA+Dihydrolipoamide=CoA+S-Glutaryldihydrolipoamide'
'm546'	'9(S)-HPODE'					'1357'	'Propane-1,2-diol+NADP+=Lactaldehyde+NADPH+H+'
'm547'	'9,10-hydroxyoctadec-12(Z)-enoate'					'1358'	'Prostaglandin E2+NAD+ ST = LT (5Z,13E)-11alpha-Hydroxy-9,15-dioxoprost-13-enoate+NADH'
'm548'	'12,13-hydroxyoctadec-9(Z)-enoate'					'1359'	'Prostaglandin F2alpha+NADP+=Prostaglandin E2+NADPH+H+'
'm549'	'(9Z)-Octadecenoic acid'					'1361'	'ATP+Protein tyrosine=ADP+Protein tyrosine phosphate'
'm550'	'ceramide d18:1(4c)'					'1362'	'ATP+Protein tyrosine=ADP+Protein tyrosine phosphate'
'm551'	'Octadecanoic acid'					'1363'	'ATP+Protein tyrosine=ADP+Protein tyrosine phosphate'
'm552'	'Octadecanoic acid'					'1364'	'Protein tyrosine phosphate+H2O=Protein tyrosine +Orthophosphate'
'm553'	'Sphingosine'					'1365'	'Protein tyrosine phosphate+H2O=Protein tyrosine +Orthophosphate'
'm554'	'Sphingosine'					'1367'	'Protein tyrosine phosphate+H2O=Protein tyrosine +Orthophosphate'
'm555'	'Sphingosine'					'1379'	'Phenethylamine+Oxygen+H2O=Phenylacetaldehyde+NH3+H2O2'
'm556'	'Sphingosine'					'1382'	'2,3-Dehydroacyl-CoA+sn-Glycerol 3-phosphate=CoA +1-Acyl-sn-glycerol 3-phosphate'
'm557'	'Sphingosine'					'1383'	'3-Sulfino-L-alanine+2-Oxoglutarate=3-Sulfinylpyruvate +Glutamate'
'm558'	'3-Dehydrosphinganine'					'1384'	'3-Sulfino-L-alanine+2-Oxoglutarate=3-Sulfinylpyruvate +Glutamate'
'm559'	'3-Dehydrosphinganine'					'1388'	'UDP-N-acetyl-D-glucosamine+1-Phosphatidyl-D-myo-inositol=UDP +N-Acetyl-D-glucosaminylphosphatidylinositol'
'm560'	'3-Dehydrosphinganine'					'1391'	'2-Methylpropanoyl-CoA+Oxygen=2-Methylprop-2-enoyl-CoA+2 H2O'
'm561'	'Sphingosine 1-phosphate'					'1392'	'2-Methylpropanoyl-CoA+FAD=2-Methylprop-2-enoyl-CoA+FADH2'
'm562'	'Sphingosine 1-phosphate'					'1394'	'3-Hydroxy-L-kynurenine+H2O=3-Hydroxyanthranilate+L-Alanine'
'm563'	'Sphingosine 1-phosphate'					'1396'	'Indole-3-acetaldehyde+NAD++H2O=Indole-3-acetate+NADH+H+'
'm564'	'Sphinganine'					'1399'	'1,2-Diacyl-sn-glycerol+H2O=Acylglycerol+Fatty acid'
'm565'	'Sphinganine'					'1400'	'1,2-Diacyl-sn-glycerol+H2O=Acylglycerol+Fatty acid'
'm566'	'Sphinganine'					'1402'	'1,2-Diacyl-sn-glycerol+H2O=2-Acylglycerol+Fatty acid'
'm567'	'Sphinganine'					'1403'	'1,2-Diacyl-sn-glycerol+H2O=2-Acylglycerol+Fatty acid'
'm568'	'Sphinganine'					'1412'	'Xanthosine 5''-phosphate+H2O=Xanthosine+Orthophosphate'
'm569'	'Sphinganine 1-phosphate'					'1413'	'Xanthosine 5''-phosphate+H2O=Xanthosine+Orthophosphate'
'm570'	'Sphinganine 1-phosphate'					'1414'	'Xanthosine 5''-phosphate+H2O=Xanthosine+Orthophosphate'
'm571'	'Sphinganine 1-phosphate'					'1418'	'Cholesterol+NADPH+Oxygen=22beta-Hydroxycholesterol+NADP+ +H2O'
'm572'	'Dihydrofolate'					'1422'	'D-Fructose 2,6-bisphosphate+H2O=beta-D-Fructose 6-phosphate +Orthophosphate'
'm573'	'Tetrahydrofolate'					'1423'	'ATP+beta-D-Fructose 6-phosphate=ADP+D-Fructose2,6-bisphosphate'
'm574'	'Tetrahydrofolate'					'1426'	'alpha-D-Glucose 6-phosphate=beta-D-Glucose 6-phosphate'
'm575'	'Adrenosterone'					'1429'	'alpha-D-Glucose 6-phosphate=beta-D-Fructose 6-phosphate'
'm576'	'5-S-glutathionyl-L-DOPA'					'1431'	'1-Acyl-sn-glycero-3-phosphocholine+H2O ST = LT sn-glycero-3-Phosphocholine+Fatty acid'
'm577'	'5-S-glutathionyl-adrenochrome hydroquinone'					'1433'	'1-Acyl-sn-glycero-3-phosphocholine+H2O ST = LT sn-glycero-3-Phosphocholine+Fatty acid'
'm578'	'13E-tetranor-16-carboxy-LTE4'					'1438'	'Deoxyinosine+Orthophosphate=Hypoxanthine+2-Deoxy-D-ribose1-phosphate'
'm579'	'Androstenedione'					'1441'	'2,3-Dehydroacyl-CoA+1-Acyl-sn-glycerol 3-phosphate=CoA +Phosphatidate'
'm580'	'Androstenedione'					'1443'	'(R)-2-Methyl-3-oxopropanoyl-CoA=(S)-2-Methyl-3-oxopropanoyl-CoA'
'm581'	'Androstenedione'					'1447'	'N-Acylneuraminate 9-phosphate+Orthophosphate ST = LT N-Acyl-D-mannosamine 6-phosphate+Phosphoenolpyruvate+H2O'
'm582'	'5-androstene-3,17-dione'					'1455'	'Betaine+L-Homocysteine=N,N-Dimethylglycine+L-Methionine'
'm583'	'11beta-Hydroxyandrost-4-ene-3,17-dione'					'1456'	'Cortisol+NAD+=Cortisone+NADH+H+'
'm584'	'omega-COOH-tetranor-LTE3'					'1457'	'Cortisol+NAD+=Cortisone+NADH+H+'
'm585'	'5''-carboxy-alpha-chromanol'					'1459'	'Cortisol+NADP+=Cortisone+NADPH+H+'
'm586'	'5''-carboxy-alpha-chromanol'					'1465'	'11beta,17alpha,21-Trihydroxy-5beta-pregnane-3,20-dione+NADP+ ST = LT Cortisol+NADPH+H+ (reversible)'
'm587'	'Testosterone'					'1477'	'ATP+D-Sorbitol=ADP+Sorbitol 6-phosphate'
'm588'	'Testosterone'					'1479'	'ITP+D-Sorbitol=IDP+Sorbitol 6-phosphate'
'm589'	'Testosterone'					'1481'	'dATP+D-Sorbitol=dADP+Sorbitol 6-phosphate'
'm590'	'5alpha-Androstane-3,17-dione'					'1483'	'S-Adenosylmethioninamine+Spermidine=5''-Methylthioadenosine +Spermine'
'm591'	'Dehydroepiandrosterone'					'1485'	'Presqualene diphosphate+NADPH+H+=Pyrophosphate+Squalene +NADP+'
'm592'	'Dehydroepiandrosterone'					'1486'	'Squalene+Oxygen+NADPH+H+=(S)-2,3-Epoxysqualene+NADP+ +H2O'
'm593'	'Dehydroepiandrosterone'					'1488'	'17alpha,21-Dihydroxy-5beta-pregnane-3,11,20-trione+NADP+ ST = LT Cortisone+NADPH+H+ (reversible)'
'm594'	'Dehydroepiandrosterone'					'1495'	'3-(2-Aminoethyl)-1H-indol-5-ol+H2O+Oxygen ST = LT 5-Hydroxyindoleacetaldehyde+NH3+H2O2'
'm595'	'Dehydroepiandrosterone'					'1502'	'L-Adrenaline+H2O+Oxygen=3,4-Dihydroxymandelaldehyde +Methylamine+H2O2'
'm596'	'5beta-Androstane-3,17-dione'					'1503'	'L-Adrenaline+H2O+Oxygen=3,4-Dihydroxymandelaldehyde +Methylamine+H2O2'
'm597'	'Dehydroepiandrosterone sulfate'					'1508'	'Melibiitol+H2O=D-Sorbitol+D-Galactose'
'm598'	'Dehydroepiandrosterone sulfate'					'1522'	'ATP+Sphinganine=ADP+Sphinganine 1-phosphate'
'm599'	'Dehydroepiandrosterone sulfate'					'1523'	'Sphinganine+NADP+=3-Dehydrosphinganine+NADPH+H+ (reversible)'
'm600'	'Dehydroepiandrosterone sulfate'					'1524'	'Sphinganine+NADP+=3-Dehydrosphinganine+NADPH+H+'
'm601'	'androsterone sulfate'					'1525'	'Sphinganine+NADP+=3-Dehydrosphinganine+NADPH+H+'
'm602'	'androsterone sulfate'					'1527'	'Deamino-NAD++H2O=AMP+Nicotinate D-ribonucleotide'
'm603'	'androsterone sulfate'					'1528'	'Deamino-NAD++H2O=AMP+Nicotinate D-ribonucleotide'
'm604'	'5alpha-dihydrotestosterone sulfate'					'1529'	'Deamino-NAD++H2O=AMP+Nicotinate D-ribonucleotide'
'm605'	'5alpha-dihydrotestosterone sulfate'					'1530'	'ATP+Nicotinate D-ribonucleotide=Pyrophosphate+Deamino-NAD+'
'm606'	'5alpha-dihydrotestosterone sulfate'					'1531'	'ATP+Nicotinate D-ribonucleotide=Pyrophosphate+Deamino-NAD+'
'm607'	'6-(_ST_i_LT_N_ST_/i_LT_-acetyl-D-glucosaminyl)-1-phosphatidyl-1D-myo-inositol'					'1533'	'ATP+Pantothenate=ADP+D-4''-Phosphopantothenate'
'm608'	'N-Acetyl-D-glucosaminylphosphatidylinositol'					'1536'	'4-Nitrophenyl phosphate+H2O=4-Nitrophenol+Orthophosphate'
'm609'	'Androsterone'					'1539'	'(S)-3-Hydroxybutanoyl-CoA=Crotonoyl-CoA+H2O'
'm610'	'Androsterone'					'1540'	'(R)-3-Hydroxybutanoyl-CoA=Crotonoyl-CoA+H2O'
'm611'	'Androsterone'					'1541'	'ATP+Pantetheine 4''-phosphate=Pyrophosphate+Dephospho-CoA'
'm612'	'Dihydrotestosterone'					'1542'	'Dephospho-CoA+H2O=Pantetheine 4''-phosphate+AMP'
'm613'	'Dihydrotestosterone'					'1546'	'3-Hydroxypropionyl-CoA=Propenoyl-CoA+H2O'
'm614'	'Dihydrotestosterone'					'1549'	'Leukotriene A4+H2O=Leukotriene B4'
'm615'	'Androst-5-ene-3beta,17beta-diol'					'1550'	'5(S)-HPETE=Leukotriene A4+H2O'
'm616'	'Androst-5-ene-3beta,17beta-diol'					'1551'	'5(S)-HPETE=Leukotriene A4+H2O'
'm617'	'5beta-Dihydrotestosterone'					'1563'	'Mercaptopyruvate+Sulfite=H2S2O3+Pyruvate'
'm618'	'5beta-Dihydrotestosterone'					'1569'	'3-Hydroxypropionyl-CoA+Orthophosphate+ADP ST = LT 3-Hydroxypropanoate+CoA+ATP'
'm619'	'N-Acylsphingosine'					'1573'	'alpha-D-Fucoside+H2O=Alcohol+6-Deoxy-L-galactose'
'm620'	'N-Acylsphingosine'					'1578'	'2-Methylbutanoyl-CoA+Oxygen=2-Methylbut-2-enoyl-CoA+2 H2O'
'm621'	'N-Acylsphingosine'					'1579'	'3-Methyl-2-oxopentanoate+CoA+NAD+=2-Methylbutanoyl-CoA+CO2+ NADH'
'm622'	'N-Acylsphingosine'					'1580'	'2-Methylbutanoyl-CoA+FAD=2-Methylbut-2-enoyl-CoA+FADH2'
'm623'	'N-Acylsphingosine'					'1589'	'(S)-2,3-Epoxysqualene=Lanosterol'
'm624'	'Ceramide 1-phosphate'					'1591'	'Coproporphyrinogen III+Oxygen=Protoporphyrinogen IX+2 CO2 +2 H2O'
'm625'	'Ceramide 1-phosphate'					'1593'	'2 Protoporphyrinogen IX+3 Oxygen=2 Protoporphyrin+6 H2O'
'm626'	'Ceramide 1-phosphate'					'1607'	'4-Trimethylammoniobutanal+NAD++H2O ST = LT 4-Trimethylammoniobutanoate+NADH+H+'
'm627'	'pristanate'					'1608'	'4-Trimethylammoniobutanal+NAD++H2O ST = LT 4-Trimethylammoniobutanoate+NADH+H+'
'm628'	'pristanate'					'1609'	'4-Trimethylammoniobutanal+Glycine ST = LT 3-Hydroxy-N6,N6,N6-trimethyl-L-lysine'
'm629'	'(2S,6R,10R)-pristanate'					'1610'	'4-Trimethylammoniobutanal+Glycine ST = LT 3-Hydroxy-N6,N6,N6-trimethyl-L-lysine'
'm630'	'Dihydroceramide'					'1615'	'trans-4-Hydroxy-L-proline+FAD ST = LT L-1-Pyrroline-3-hydroxy-5-carboxylate+FADH2'
'm631'	'Dihydroceramide'					'1624'	'Cholesta-5,7-dien-3beta-ol=Vitamin D3 (reversible)'
'm632'	'Dihydroceramide'					'1628'	'3-Carboxy-1-hydroxypropyl-ThPP+Lipoamide ST = LT S-Succinyldihydrolipoamide+Thiamin diphosphate'
'm633'	'Dihydroceramide'					'1631'	'beta-D-Glucose 6-phosphate=beta-D-Fructose 6-phosphate'
'm634'	'2(S)-pristanal'					'1633'	'17alpha,20alpha-Dihydroxypregn-4-en-3-one+NADP+ ST = LT 17alpha-Hydroxyprogesterone+NADPH (reversible)'
'm635'	'2(R)-pristanal'					'1639'	'17alpha-Hydroxypregnenolone+NADP+=17alpha-Hydroxyprogesterone+ NADPH+H+ (reversible)'
'm636'	'Benzo[a]pyrene-9,10-oxide'					'1640'	'17alpha-Hydroxypregnenolone+NADP+=17alpha-Hydroxyprogesterone+ NADPH+H+'
'm637'	'Benzo[a]pyrene-9,10-oxide'					'1641'	'17alpha-Hydroxypregnenolone+NADP+=17alpha-Hydroxyprogesterone+ NADPH+H+'
'm638'	'Benzo[a]pyrene-9,10-oxide'					'1642'	'17alpha-Hydroxyprogesterone+NADPH+H++Oxygen ST = LT 21-Deoxycortisol+NADP++H2O'
'm639'	'Benzo[a]pyrene-7,8-oxide'					'1643'	'17alpha-Hydroxyprogesterone+NADPH+H++Oxygen ST = LT 21-Deoxycortisol+NADP++H2O'
'm640'	'Benzo[a]pyrene-7,8-oxide'					'1644'	'sn-glycero-3-Phospho-1-inositol+H2O=Glycerol+1L-myo-Inositol1-phosphate (reversible)'
'm641'	'Benzo[a]pyrene-7,8-oxide'					'1645'	'3-(4-Hydroxyphenyl)pyruvate ST = LT 2-Hydroxy-3-(4-hydroxyphenyl)propenoate'
'm642'	'Benzo[a]pyrene-4,5-oxide'					'1648'	'Nicotinate D-ribonucleotide+H2O=Nicotinate D-ribonucleoside +Orthophosphate'
'm643'	'Benzo[a]pyrene-4,5-oxide'					'1650'	'Nicotinate D-ribonucleotide+H2O=Nicotinate D-ribonucleoside +Orthophosphate'
'm644'	'Benzo[a]pyrene-4,5-oxide'					'1653'	'beta-D-Galactosyl-1,4-beta-D-glucosylceramide+H2O ST = LT Glucosylceramide+beta-D-Galactose'
'm645'	'Benzo[a]pyrene-7,8-diol'					'1654'	'beta-D-Galactosyl-1,4-beta-D-glucosylceramide+H2O ST = LT Glucosylceramide+beta-D-Galactose'
'm646'	'Benzo[a]pyrene-7,8-diol'					'1655'	'beta-D-Galactosyl-1,4-beta-D-glucosylceramide+H2O ST = LT Glucosylceramide+beta-D-Galactose'
'm647'	'Benzo[a]pyrene-7,8-diol'					'1656'	'ATP+1-Phosphatidyl-D-myo-inositol=ADP +1-Phosphatidyl-1D-myo-inositol 4-phosphate'
'm648'	'5,10-Methenyltetrahydrofolate'					'1657'	'ATP+1-Phosphatidyl-D-myo-inositol=ADP +1-Phosphatidyl-1D-myo-inositol 4-phosphate'
'm649'	'5,10-Methenyltetrahydrofolate'					'1659'	'ATP+1-Phosphatidyl-D-myo-inositol=ADP +1-Phosphatidyl-1D-myo-inositol 4-phosphate'
'm650'	'5,10-Methenyltetrahydrofolate'					'1660'	'ATP+1-Phosphatidyl-D-myo-inositol=ADP +1-Phosphatidyl-1D-myo-inositol 3-phosphate'
'm651'	'5,10-Methylenetetrahydrofolate'					'1661'	'ATP+1-Phosphatidyl-D-myo-inositol=ADP +1-Phosphatidyl-1D-myo-inositol 3-phosphate'
'm652'	'5,10-Methylenetetrahydrofolate'					'1662'	'ATP+1-Phosphatidyl-D-myo-inositol=ADP +1-Phosphatidyl-1D-myo-inositol 3-phosphate'
'm653'	'10-Formyltetrahydrofolate'					'1663'	'ATP+1-Phosphatidyl-D-myo-inositol=ADP +1-Phosphatidyl-1D-myo-inositol 3-phosphate'
'm654'	'10-Formyltetrahydrofolate'					'1665'	'(S)-Methylmalonate semialdehyde+CoA+NAD+ ST = LT (R)-2-Methyl-3-oxopropanoyl-CoA+NADH'
'm655'	'5-Formyltetrahydrofolate'					'1666'	'1D-myo-Inositol 1,4-bisphosphate+H2O=myo-Inositol 4-phosphate+ Orthophosphate'
'm656'	'5-Formyltetrahydrofolate'					'1669'	'3beta-Hydroxyandrost-5-en-17-one 3-sulfate+H2O ST = LT 3beta-Hydroxyandrost-5-en-17-one+Sulfate'
'm657'	'5-Formiminotetrahydrofolate'					'1670'	'3beta-Hydroxyandrost-5-en-17-one 3-sulfate+H2O ST = LT 3beta-Hydroxyandrost-5-en-17-one+Sulfate'
'm658'	'5-Formiminotetrahydrofolate'					'1671'	'3beta-Hydroxyandrost-5-en-17-one 3-sulfate+H2O ST = LT 3beta-Hydroxyandrost-5-en-17-one+Sulfate'
'm659'	'(1R)-Hydroxy-(2R)-glutathionyl-1,2-dihydronaphthalene'					'1672'	'3beta-Hydroxyandrost-5-en-17-one 3-sulfate+H2O ST = LT 3beta-Hydroxyandrost-5-en-17-one+Sulfate'
'm660'	'(1S)-Hydroxy-(2S)-glutathionyl-1,2-dihydronaphthalene'					'1675'	'1-Acyl-sn-glycero-3-phosphoethanolamine+H2O=Fatty acid +sn-glycero-3-Phosphoethanolamine'
'm661'	'(1R)-Glutathionyl-(2R)-hydroxy-1,2-dihydronaphthalene'					'1684'	'Glycine+Lipoylprotein=S-Aminomethyldihydrolipoylprotein+CO2'
'm662'	'(1R)-Glutathionyl-(2R)-hydroxy-1,2-dihydronaphthalene'					'1685'	'1D-myo-Inositol 1,3,4-trisphosphate+H2O=D-myo-Inositol3,4-bisphosphate+Orthophosphate'
'm663'	'5-Methyltetrahydrofolate'					'1690'	'ATP+D-myo-Inositol 1,4,5-trisphosphate=ADP+1D-myo-Inositol1,3,4,5-tetrakisphosphate'
'm664'	'5-Methyltetrahydrofolate'					'1692'	'1D-myo-Inositol 1,3,4,5-tetrakisphosphate+H2O=D-myo-Inositol1,4,5-trisphosphate+Orthophosphate'
'm665'	'12-oxo-20-carboxy-leukotriene B4'					'1693'	'1-Phosphatidyl-D-myo-inositol 4,5-bisphosphate+H2O ST = LT D-myo-Inositol 1,4,5-trisphosphate+1,2-Diacyl-sn-glycerol'
'm666'	'leukotriene A5'					'1694'	'1-Phosphatidyl-D-myo-inositol 4,5-bisphosphate+H2O ST = LT D-myo-Inositol 1,4,5-trisphosphate+1,2-Diacyl-sn-glycerol'
'm667'	'5-oxo-EPE'					'1695'	'1-Phosphatidyl-D-myo-inositol 4,5-bisphosphate+H2O ST = LT D-myo-Inositol 1,4,5-trisphosphate+1,2-Diacyl-sn-glycerol'
'm668'	'5(S),6(S)-epoxy-15(R)-HEPE'					'1696'	'1-Phosphatidyl-D-myo-inositol 4,5-bisphosphate+H2O ST = LT D-myo-Inositol 1,4,5-trisphosphate+1,2-Diacyl-sn-glycerol'
'm669'	'Retinal'					'1697'	'ATP+[Pyruvate dehydrogenase (lipoamide)]=ADP+[Pyruvatedehydrogenase (lipoamide)] phosphate'
'm670'	'20-carboxy-leukotriene-B4'					'1699'	'[Pyruvate dehydrogenase (lipoamide)] phosphate+H2O=[Pyruvatedehydrogenase (lipoamide)]+Orthophosphate'
'm671'	'20-carboxy-leukotriene-B4'					'1701'	'ATP+1-Phosphatidyl-1D-myo-inositol 4-phosphate=ADP +1-Phosphatidyl-D-myo-inositol 4,5-bisphosphate'
'm672'	'20-carboxy-leukotriene-B4'					'1702'	'ATP+1-Phosphatidyl-1D-myo-inositol 4-phosphate=ADP +1-Phosphatidyl-D-myo-inositol 4,5-bisphosphate'
'm673'	'20-carboxy-leukotriene-B4'					'1704'	'ATP+1-Phosphatidyl-1D-myo-inositol 4-phosphate=ADP +1-Phosphatidyl-D-myo-inositol 4,5-bisphosphate'
'm674'	'12-oxo-10,11-dihydro-20-COOH-LTB4'					'1707'	'G00143+H2O=G00144+Acetate'
'm675'	'timnodonate'					'1708'	'UDP-D-galactose+Lactosylceramide=UDP+Globotriaosylceramide'
'm676'	'timnodonate'					'1709'	'UDP-D-galactose+Lactosylceramide=UDP+Globotriaosylceramide'
'm677'	'timnodonate'					'1711'	'CMP-N-acetylneuraminate +beta-D-Galactosyl-1,4-beta-D-glucosylceramide=CMP+GM3'
'm678'	'5-oxo-(6E,8Z,11Z,14Z)-eicosatetraenoic acid'					'1727'	'2-Hydroxyglutarate+FAD=2-Oxoglutarate+FADH2 (reversible)'
'm679'	'15(R)-HEPE'					'1739'	'Calcidiol+Oxygen+NADPH=Calcitriol+NADP++H2O'
'm680'	'5-HEPE'					'1740'	'3-beta-D-Galactosyl-sn-glycerol+H2O=Galactose+Glycerol'
'm681'	'11R-HEPE'					'1741'	'3-beta-D-Galactosyl-sn-glycerol+H2O=Galactose+Glycerol'
'm682'	'18R-HEPE'					'1742'	'3-beta-D-Galactosyl-sn-glycerol+H2O=Galactose+Glycerol'
'm683'	'5(S),6(S)-epoxy-15(R)-hydroxyeicosatetraenoate'					'1745'	'Linoleate+Oxygen ST = LT (9Z,11E)-(13S)-13-Hydroperoxyoctadeca-9,11-dienoic acid'
'm684'	'5(S),6(S)-epoxy-15(S)-hydroxy-7E,9E,11Z,13E-eicosatetraenoic acid anion'					'1747'	'Linoleate+Oxygen ST = LT (9Z,11E)-(13S)-13-Hydroperoxyoctadeca-9,11-dienoic acid'
'm685'	'5(S),6(S)-epoxy-15(S)-hydroxy-7E,9E,11Z,13E-eicosatetraenoic acid anion'					'1750'	'ATP+Phytanate+CoA=AMP+Pyrophosphate+Phytanoyl-CoA'
'm686'	'5(S),6(S)-epoxy-15(S)-hydroxy-7E,9E,11Z,13E-eicosatetraenoic acid anion'					'1753'	'ATP+Protamine=ADP+O-Phosphoprotamine'
'm687'	'delta12-Prostaglandin J2'					'1759'	'Stachyose+H2O=Raffinose+D-Galactose'
'm688'	'delta12-Prostaglandin J2'					'1806'	'Lanosterol+Oxygen+NADPH+H+=14-Demethyllanosterol+Formate+ NADP+'
'm689'	'12-oxo-leukotriene B4'					'1809'	'11beta,21-Dihydroxy-3,20-oxo-5beta-pregnan-18-al+Acceptor ST = LT Aldosterone+Reduced acceptor (reversible)'
'm690'	'12-oxo-leukotriene B4'					'1810'	'Chlordecone alcohol+NADP+=Chlordecone+NADPH (reversible)'
'm691'	'12-oxo-leukotriene B4'					'1813'	'Propanoyl-CoA+Choloyl-CoA=CoA +3alpha,7alpha,12alpha-Trihydroxy-5beta-24-oxocholestanoyl-CoA'
'm692'	'12-oxo-leukotriene B4'					'1816'	'O-(4-Hydroxy-3,5-diidophenyl)-3,5-diiodo-L-tyrosine+Reducedacceptor=Triiodothyronine+Iodide+Acceptor+H+'
'm693'	'5-oxo-6-trans-leukotriene B4'					'1819'	'Octanoyl-CoA+NADP+=trans-Oct-2-enoyl-CoA+NADPH+H+'
'm694'	'5-oxo-6-trans-leukotriene B4'					'1820'	'Octanoyl-CoA+FAD=trans-Oct-2-enoyl-CoA+FADH2'
'm695'	'5-oxo-6-trans-leukotriene B4'					'1821'	'Octanoyl-CoA+Acetyl-CoA=CoA+3-Oxodecanoyl-CoA'
'm696'	'5-oxo-6-trans-leukotriene B4'					'1826'	'Pregnenolone+Reduced acceptor+Oxygen=21-Hydroxypregnenolone+ Acceptor+H2O'
'm697'	'5-oxo-6E-12-epi-LTB4'					'1830'	'Linoleoyl-CoA+Reduced acceptor+Oxygen=gamma-Linolenoyl-CoA +Acceptor+2 H2O'
'm698'	'5-hydroperoxy-EPA'					'1831'	'Linoleoyl-CoA+Reduced acceptor+Oxygen=gamma-Linolenoyl-CoA +Acceptor+2 H2O'
'm699'	'15(S)-hydroperoxy-EPE'					'1833'	'Dihydrolipoylprotein+NADP+=Lipoylprotein+NADPH'
'm700'	'leukotriene B5'					'1837'	'Corticosterone+NAD+=11-Dehydrocorticosterone+NADH+H+'
'm701'	'leukotriene B5'					'1839'	'Corticosterone+NADP+=11-Dehydrocorticosterone+NADPH+H+'
'm702'	'15(R)-hydroperoxy-EPE'					'1841'	'11beta-Hydroxyprogesterone+Reduced acceptor+Oxygen ST = LT Corticosterone+Acceptor+H2O'
'm703'	'15(R)-hydroperoxy-EPE'					'1842'	'11beta,21-Dihydroxy-5beta-pregnane-3,20-dione+Acceptor ST = LT Corticosterone+Reduced acceptor (reversible)'
'm704'	'5-oxo-12(S)-hydroxy-eicosa-6E,8Z,10E,14Z-tetraenoate'					'1843'	'11-Deoxycorticosterone+Reduced ferredoxin+Oxygen ST = LT Corticosterone+Oxidized ferredoxin+H2O'
'm705'	'20-oxo-leukotriene B4'					'1844'	'Lauroyl-CoA+NADP+=2-trans-Dodecenoyl-CoA+NADPH+H+'
'm706'	'20-oxo-leukotriene B4'					'1845'	'Lauroyl-CoA+FAD=2-trans-Dodecenoyl-CoA+FADH2'
'm707'	'20-oxo-leukotriene B4'					'1846'	'Lauroyl-CoA+Acetyl-CoA=CoA+3-Oxotetradecanoyl-CoA'
'm708'	'12-oxo-20-hydroxy-leukotriene B4'					'1850'	'Leukotriene B4+NADPH+H++Oxygen=20-OH-Leukotriene B4 +NADP++H2O'
'm709'	'12-oxo-20-hydroxy-leukotriene B4'					'1851'	'Leukotriene C4+H2O=Leukotriene D4+Glutamate'
'm710'	'15-oxo-lipoxin A4'					'1852'	'(S)-Methylmalonate semialdehyde+NAD++H2O=Methylmalonate +NADH'
'm711'	'PGH3'					'1853'	'(S)-Methylmalonate semialdehyde+NAD++H2O=Methylmalonate +NADH'
'm712'	'15-epi-lipoxin A5'					'1873'	'20alpha,22beta-Dihydroxycholesterol+Ferredoxin+Oxygen ST = LT 4-Methylpentanal+Pregnenolone+Ferredoxin'
'm713'	'15-epi-lipoxin B5'					'1884'	'Estrone 3-sulfate+H2O=Sulfate+Estrone'
'm714'	'20-hydroxy-leukotriene B5'					'1885'	'Estrone 3-sulfate+H2O=Sulfate+Estrone'
'm715'	'12-oxo-20-dihydroxy-leukotriene B4'					'1886'	'Estrone 3-sulfate+H2O=Sulfate+Estrone'
'm716'	'12-oxo-20-dihydroxy-leukotriene B4'					'1887'	'Estrone 3-sulfate+H2O=Sulfate+Estrone'
'm717'	'11-dehydro-15-keto-TXB2'					'1893'	'Tetradecanoyl-CoA+NADP+=trans-Tetradec-2-enoyl-CoA+NADPH +H+'
'm718'	'12-oxo-20-trihydroxy-leukotriene B4'					'1894'	'Tetradecanoyl-CoA+FAD=trans-Tetradec-2-enoyl-CoA+FADH2'
'm719'	'12-oxo-20-trihydroxy-leukotriene B4'					'1895'	'Tetradecanoyl-CoA+Acetyl-CoA=CoA+3-Oxopalmitoyl-CoA'
'm720'	'Retinol'					'1901'	'3''-Phosphoadenylyl sulfate+Galactosylceramide=Adenosine3'',5''-bisphosphate+Sulfatide'
'm721'	'13-cis-retinol'					'1902'	'3''-Phosphoadenylyl sulfate+Galactosylceramide=Adenosine3'',5''-bisphosphate+Sulfatide'
'm722'	'13-cis-retinol'					'1907'	'Digalactosylceramide+H2O=Galactosylceramide+Galactose'
'm723'	'Leukotriene A4'					'1908'	'Digalactosylceramide+H2O=Galactosylceramide+Galactose'
'm724'	'Leukotriene A4'					'1909'	'Digalactosylceramide+H2O=Galactosylceramide+Galactose'
'm725'	'Prostaglandin A2'					'1910'	'N-Acetylputrescine+H2O+Oxygen=N4-Acetylaminobutanal+NH3 +H2O2'
'm726'	'Prostaglandin J2'					'1911'	'N-Acetylputrescine+H2O+Oxygen=N4-Acetylaminobutanal+NH3 +H2O2'
'm727'	'9-peroxy-5Z,7E,11Z,14Z-eicosatetraenoate'					'1920'	'Imidazole-4-acetaldehyde+NAD++H2O=Imidazole-4-acetate+NADH+ H+'
'm728'	'(5Z,13E)-11alpha-Hydroxy-9,15-dioxoprost-13-enoate'					'1921'	'Imidazole-4-acetaldehyde+NAD++H2O=Imidazole-4-acetate+NADH+ H+'
'm729'	'20-COOH-10,11-dihydro-LTB4'					'1927'	'1-Methylnicotinamide+2 Oxygen+2 H2O ST = LT N1-Methyl-4-pyridone-5-carboxamide +N1-Methyl-2-pyridone-5-carboxamide+2 H2O2'
'm730'	'CMP-N-acetylneuraminate'					'1928'	'3-Methylbutanoyl-CoA+FAD=3-Methylcrotonyl-CoA+FADH2'
'm731'	'CMP-N-acetylneuraminate'					'1929'	'3-Methylbutanoyl-CoA+Acceptor=3-Methylcrotonyl-CoA+Reducedacceptor'
'm732'	'CMP-N-acetylneuraminate'					'1931'	'N-Acetylmuramoyl-Ala+H2O=N-Acetyl-D-muramoate+L-Alanine'
'm733'	'12-hydroxyeicosatetraenoate'					'1934'	'Tetrahydrofolate+S-Aminomethyldihydrolipoylprotein ST = LT 5,10-Methylenetetrahydrofolate+NH3+Dihydrolipoylprotein'
'm734'	'12-hydroxyeicosatetraenoate'					'1935'	'3-Hydroxyisovaleryl-CoA=3-Methylcrotonyl-CoA+H2O (reversible)'
'm735'	'11-hydroxyeicosatetraenoate'					'1938'	'21-Hydroxypregnenolone+NAD+=11-Deoxycorticosterone+NADH+H+'
'm736'	'15(R)-Hydroxy-(5Z,8Z,11Z,13E)-eicosatetraenoate'					'1940'	'(S)-3-Hydroxydodecanoyl-CoA=2-trans-Dodecenoyl-CoA+H2O'
'm737'	'8-hydroxyeicosatetraenoate'					'1941'	'3-Hydroxy-L-kynurenine+2-Oxoglutarate ST = LT 4-(2-Amino-3-hydroxyphenyl)-2,4-dioxobutanoate+L-Glutamate'
'm738'	'13-HETE'					'1942'	'3-Hydroxy-L-kynurenine+2-Oxoglutarate ST = LT 4-(2-Amino-3-hydroxyphenyl)-2,4-dioxobutanoate+L-Glutamate'
'm739'	'7-HETE'					'1943'	'O-Phospho-L-serine+2-Oxoglutarate=3-Phosphonooxypyruvate +L-Glutamate (reversible)'
'm740'	'10-HETE'					'1949'	'H2O+IV3GalNAca-Gb4Cer=N-Acetyl-D-galactosamine+Globoside'
'm741'	'18-HETE'					'1952'	'H2O+Globoside=N-Acetyl-D-galactosamine+Globotriaosylceramide'
'm742'	'17-HETE'					'1954'	'L-3-Amino-isobutanoate+2-Oxoglutarate=(S)-Methylmalonatesemialdehyde+L-Glutamate'
'm743'	'6-trans-leukotriene B4'					'1958'	'(2S,3S)-3-Hydroxy-2-methylbutanoyl-CoA+NAD+ ST = LT 2-Methylacetoacetyl-CoA+NADH'
'm744'	'11,12-dihydroxy-5(E),7(E),9(E),14(Z)-eicosatetraenoate'					'1959'	'(2S,3S)-3-Hydroxy-2-methylbutanoyl-CoA=2-Methylbut-2-enoyl-CoA +H2O'
'm745'	'6,7-dihydro-5-oxo-leukotriene B4'					'1967'	'2-Methylprop-2-enoyl-CoA+H2O=(S)-3-Hydroxyisobutyryl-CoA'
'm746'	'6,7-dihydro-5-oxo-leukotriene B4'					'1969'	'3-Methyl-2-oxopentanoate+Lipoamide ST = LT S-(2-Methylbutanoyl)-dihydrolipoamide+CO2'
'm747'	'6,7-dihydro-5-oxo-leukotriene B4'					'1976'	'Peptidyl-L-lysyl-peptide+H2O+Oxygen=Peptidyl-allysyl-peptide+ NH3+H2O2'
'm748'	'6,7-dihydro-5-oxo-leukotriene B4'					'1977'	'ATP+Tetrahydrofolyl-[Glu](n)+L-Glutamate=ADP +Orthophosphate+Tetrahydrofolyl-[Glu](n)'
'm749'	'6,7-dihydro-5-oxo-12-epi-LTB4'					'1978'	'ATP+Tetrahydrofolyl-[Glu](n)+L-Glutamate=ADP +Orthophosphate+Tetrahydrofolyl-[Glu](n)'
'm750'	'6,7-dihydro-5-oxo-12-epi-LTB4'					'1981'	'Peptidylproline (omega=180)=Peptidylproline (omega=0) (reversible)'
'm751'	'6,7-dihydro-5-oxo-12-epi-LTB4'					'1987'	'2-Amino-4-hydroxy-6-(erythro-1,2,3-trihydroxypropyl)dihydropteridinetriphosphate+H2O=6-Pyruvoyltetrahydropterin+Triphosphate'
'm752'	'6,7-dihydro-5-oxo-12-epi-LTB4'					'1994'	'4-(2-Aminoethyl)-1,2-benzenediol+H2O+Oxygen ST = LT 3,4-Dihydroxyphenylacetaldehyde+NH3+H2O2'
'm753'	'20-hydroxy-5S-HETE'					'1996'	'4-(2-Aminoethyl)-1,2-benzenediol+H2O+Oxygen ST = LT 3,4-Dihydroxyphenylacetaldehyde+NH3+H2O2'
'm754'	'10,11-dihydro-12-oxo-LTB4'					'2011'	'5alpha-Cholest-8-en-3beta-ol+CO2+4 H2O+3 NADP+=Methostenol+ 3 Oxygen+3 NADPH+3 H+'
'm755'	'10,11-dihydro-12-oxo-LTB4'					'2020'	'D-myo-Inositol 3,4-bisphosphate+H2O=1D-myo-Inositol3-phosphate+Orthophosphate'
'm756'	'10,11-dihydro-12-oxo-LTB4'					'2021'	'Glycoprotein N-acetyl-D-glucosaminyl-phospho-D-mannose+H2O ST = LT N-Acetyl-D-glucosamine+Glycoprotein phospho-D-mannose (reversible)'
'm757'	'9-deoxy-delta12-PGD2'					'2031'	'1-Phosphatidyl-D-myo-inositol 4,5-bisphosphate+H2O ST = LT 1-Phosphatidyl-1D-myo-inositol 4-phosphate+Orthophosphate'
'm758'	'9-deoxy-delta12-PGD2'					'2033'	'1-Phosphatidyl-D-myo-inositol 4,5-bisphosphate+H2O ST = LT 1-Phosphatidyl-1D-myo-inositol 4-phosphate+Orthophosphate'
'm759'	'5,12-DiHETE'					'2036'	'Electron-transferring flavoprotein+Propanoyl-CoA=Reducedelectron-transferring flavoprotein+Propenoyl-CoA'
'm760'	'5,12-DiHETE'					'2038'	'Reduced electron-transferring flavoprotein+Ubiquinone ST = LT Electron-transferring flavoprotein+Ubiquinol'
'm761'	'12,20-DiHETE'					'2040'	'L-1-Pyrroline-3-hydroxy-5-carboxylate+NAD++2 H2O ST = LT L-erythro-4-Hydroxyglutamate+NADH+H+'
'm762'	'14,15-DiHETE'					'2041'	'L-1-Pyrroline-3-hydroxy-5-carboxylate+NADP++2 H2O ST = LT L-erythro-4-Hydroxyglutamate+NADPH+H+'
'm763'	'15-epi-lipoxin A4'					'2043'	'1-Alkyl-2-acetyl-sn-glycero-3-phosphocholine+H2O ST = LT 1-Organyl-2-lyso-sn-glycero-3-phosphocholine+Acetate'
'm764'	'15-epi-lipoxin B4'					'2044'	'1-Alkyl-2-acetyl-sn-glycero-3-phosphocholine+H2O ST = LT 1-Organyl-2-lyso-sn-glycero-3-phosphocholine+Acetate'
'm765'	'13,14-dihydro-15-oxo-lipoxin A4'					'2048'	'Digalactosyl-diacylglycerol+H2O ST = LT 1,2-Diacyl-3-beta-D-galactosyl-sn-glycerol+Galactose'
'm766'	'5,12,20-TriHETE'					'2052'	'3beta-Hydroxy-4beta-methyl-5alpha-cholest-7-ene-4alpha-carboxylate +NAD+=4alpha-Methyl-5alpha-cholest-7-en-3-one+CO2+NADH'
'm767'	'15-oxo-PGE1'					'2054'	'UDP-N-acetyl-D-glucosamine+Lactosylceramide=UDP+Lc3Cer'
'm768'	'(5Z,13E)-(15S)-11-_AND_alpha;,15-dihydroxy-9-oxoprosta-5,13-dienoate'					'2055'	'UDP-N-acetyl-D-glucosamine+Lactosylceramide=UDP+Lc3Cer'
'm769'	'11-dehydrothromboxane B2'					'2056'	'UDP-N-acetyl-D-glucosamine +N-Acetyl-D-glucosaminyldiphosphodolichol=UDP +N,N''-Chitobiosyldiphosphodolichol'
'm770'	'20-dihydroxyleukotriene B4'					'2057'	'UDP-N-acetyl-D-glucosamine +N-Acetyl-D-glucosaminyldiphosphodolichol=UDP +N,N''-Chitobiosyldiphosphodolichol'
'm771'	'9,11-cycloperoxy-5-hydroperoxy-6E,14Z-eicosadienoate'					'2062'	'GDP-D-mannose+N,N''-Chitobiosyldiphosphodolichol=GDP+G00003'
'm772'	'11-dehydro-13,14-dihydro-15-oxo-TXB2'					'2064'	'3alpha,7alpha-Dihydroxy-5beta-cholestan-26-al+NAD++H2O ST = LT 3alpha,7alpha-Dihydroxy-5beta-cholestanate+NADH+H+'
'm773'	'20-trihydroxy-leukotriene-B4'					'2065'	'3alpha,7alpha-Dihydroxy-5beta-cholestan-26-al+NAD++H2O ST = LT 3alpha,7alpha-Dihydroxy-5beta-cholestanate+NADH+H+'
'm774'	'N-acetyl-seryl-aspartyl-lysyl-proline'					'2066'	'3alpha,7alpha-Dihydroxy-5beta-cholestan-26-al+NAD++H2O ST = LT 3alpha,7alpha-Dihydroxy-5beta-cholestanate+NADH+H+'
'm775'	'Glutathione disulfide'					'2069'	'Phosphatidylinositol-3,4,5-trisphosphate+H2O ST = LT 1-Phosphatidyl-D-myo-inositol 4,5-bisphosphate+Orthophosphate'
'm776'	'Glutathione disulfide'					'2080'	'ATP+1-Phosphatidyl-D-myo-inositol 4,5-bisphosphate=ADP +Phosphatidylinositol-3,4,5-trisphosphate'
'm777'	'Glutathione disulfide'					'2081'	'Propanoyl-CoA+Chenodeoxycholoyl-CoA=CoA +3alpha,7alpha-Dihydroxy-5beta-cholestanoyl-CoA'
'm778'	'(5Z,8Z,11Z,14Z)-Icosatetraenoic acid'					'2082'	'Alprostadil+NADP+ ST = LT (13E)-11alpha-Hydroxy-9,15-dioxoprost-13-enoate+NADPH'
'm779'	'(5Z,8Z,11Z,14Z)-Icosatetraenoic acid'					'2083'	'(5Z)-(15S)-11alpha-Hydroxy-9,15-dioxoprostanoate+NAD+ ST = LT (5Z)-(15S)-11alpha-Hydroxy-9,15-dioxoprosta-13-enoate+NADH (reversible)'
'm780'	'(5Z,8Z,11Z,14Z)-Icosatetraenoic acid'					'2095'	'ATP+3alpha,7alpha,12alpha-Trihydroxy-5beta-cholestanoate+CoA ST = LT AMP+Pyrophosphate +3alpha,7alpha,12alpha-Trihydroxy-5beta-cholestanoyl-CoA'
'm781'	'(15S)-15-Hydroxy-5,8,11-cis-13-trans-eicosatetraenoate'					'2099'	'CMP-N-acetylneuraminate+GM3=CMP+GD3'
'm782'	'5(S)-HETE'					'2102'	'GM2+H2O=GM3+N-Acetyl-D-galactosamine'
'm783'	'5(S)-HETE'					'2103'	'GM2+H2O=GM3+N-Acetyl-D-galactosamine'
'm784'	'5(S)-HETE'					'2104'	'CMP-N-acetylneuraminate+T antigen=CMP+G00026'
'm785'	'20-HETE'					'2105'	'CMP-N-acetylneuraminate+T antigen=CMP+G00026'
'm786'	'19(S)-HETE'					'2106'	'CMP-N-acetylneuraminate+T antigen=CMP+G00026'
'm787'	'5,6-EET'					'2116'	'GM1+H2O=GM2+Galactose'
'm788'	'5,6-EET'					'2117'	'GM1+H2O=GM2+Galactose'
'm789'	'5,6-EET'					'2118'	'GM1+H2O=GM2+Galactose'
'm790'	'8,9-EET'					'2123'	'CMP-N-acetylneuraminate +D-Galactosyl-N-acetyl-D-galactosaminyl-(N-acetylneuraminyl)-D-galactosyl-D-glucosylceramide=CMP +N-Acetylneuraminyl-D-galactosyl-N-acetyl-D-galactosaminyl-(N-acetylneuraminyl)-D-galactosyl-D-glucosylceramide'
'm791'	'8,9-EET'					'2125'	'CMP-N-acetylneuraminate+Paragloboside=CMP +Sialyl-3-paragloboside'
'm792'	'8,9-EET'					'2132'	'14-Demethyllanosterol+6 Oxygen+6 NADPH+6 H+=Zymosterol+2CO2+8 H2O+6 NADP+'
'm793'	'11,12-EET'					'2133'	'4alpha-Methylcholesta-8-en-3beta-ol=Methostenol (reversible)'
'm794'	'11,12-EET'					'2138'	'N-Methylhistamine+H2O+Oxygen=Methylimidazole acetaldehyde +NH3+H2O2'
'm795'	'11,12-EET'					'2140'	'17alpha-Hydroxypregnenolone+NADPH+H++Oxygen ST = LT 17alpha,21-Dihydroxypregnenolone+NADP++H2O'
'm796'	'14,15-EET'					'2141'	'17alpha,20alpha-Dihydroxycholesterol+NADPH+H++Oxygen ST = LT 17alpha-Hydroxypregnenolone+4-Methylpentanal+NADP++H2O'
'm797'	'14,15-EET'					'2149'	'Estriol+NAD+=16alpha-Hydroxyestrone+NADH+H+ (reversible)'
'm798'	'14,15-EET'					'2150'	'Estriol+NAD+=16alpha-Hydroxyestrone+NADH+H+'
'm799'	'16(R)-HETE'					'2152'	'Estriol+NADP+=16alpha-Hydroxyestrone+NADPH+H+'
'm800'	'9(S)-HETE'					'2169'	'(S)-3-Hydroxyhexadecanoyl-CoA+NAD+=3-Oxopalmitoyl-CoA+NADH'
'm801'	'Leukotriene B4'					'2170'	'(S)-3-Hydroxyhexadecanoyl-CoA=trans-Hexadec-2-enoyl-CoA+H2O'
'm802'	'Leukotriene B4'					'2171'	'(S)-3-Hydroxytetradecanoyl-CoA+NAD+=3-Oxotetradecanoyl-CoA +NADH'
'm803'	'(13E)-(15S)-15-Hydroxy-9-oxoprosta-10,13-dienoate'					'2172'	'(S)-3-Hydroxytetradecanoyl-CoA=trans-Tetradec-2-enoyl-CoA+H2O'
'm804'	'(13E)-(15S)-15-Hydroxy-9-oxoprosta-10,13-dienoate'					'2173'	'(S)-3-Hydroxydodecanoyl-CoA+NAD+=3-Oxododecanoyl-CoA+NADH'
'm805'	'(5Z,9E,14Z)-(8xi,11R,12S)-11,12-Epoxy-8-hydroxyicosa-5,9,14-trienoic acid'					'2174'	'Decanoyl-CoA+Acetyl-CoA=CoA+3-Oxododecanoyl-CoA'
'm806'	'(5Z,9E,14Z)-(8xi,11R,12S)-11,12-Epoxy-8-hydroxyicosa-5,9,14-trienoic acid'					'2175'	'(S)-Hydroxydecanoyl-CoA+NAD+=3-Oxodecanoyl-CoA+NADH'
'm807'	'5(S)-HPETE'					'2176'	'(S)-Hydroxydecanoyl-CoA=trans-Dec-2-enoyl-CoA+H2O (reversible)'
'm808'	'5(S)-HPETE'					'2177'	'(S)-Hydroxyoctanoyl-CoA+NAD+=3-Oxooctanoyl-CoA+NADH'
'm809'	'5(S)-HPETE'					'2178'	'(S)-Hydroxyoctanoyl-CoA=trans-Oct-2-enoyl-CoA+H2O'
'm810'	'12(S)-HPETE'					'2179'	'Hexanoyl-CoA+Acetyl-CoA=CoA+3-Oxooctanoyl-CoA'
'm811'	'12(S)-HPETE'					'2180'	'(S)-Hydroxyhexanoyl-CoA+NAD+=3-Oxohexanoyl-CoA+NADH'
'm812'	'15(S)-HPETE'					'2181'	'(S)-Hydroxyhexanoyl-CoA=trans-Hex-2-enoyl-CoA+H2O'
'm813'	'15(S)-HPETE'					'2182'	'Hexanoyl-CoA+FAD=trans-Hex-2-enoyl-CoA+FADH2'
'm814'	'15H-11,12-EETA'					'2183'	'Decanoyl-CoA+NADP+=trans-Dec-2-enoyl-CoA+NADPH+H+'
'm815'	'11H-14,15-EETA'					'2184'	'Decanoyl-CoA+FAD=trans-Dec-2-enoyl-CoA+FADH2'
'm816'	'Prostaglandin H2'					'2186'	'11beta-Hydroxyandrost-4-ene-3,17-dione+NAD+=Adrenosterone +NADH+H+'
'm817'	'Prostaglandin H2'					'2188'	'11beta-Hydroxyandrost-4-ene-3,17-dione+NADP+=Adrenosterone +NADPH+H+'
'm818'	'Prostaglandin H2'					'2192'	'ATP+beta-D-Fructose 6-phosphate=ADP+beta-D-Fructose1,6-bisphosphate'
'm819'	'Prostaglandin H2'					'2195'	'3-Ketolactose+H2O=3-Keto-beta-D-galactose+beta-D-Glucose'
'm820'	'Prostaglandin E2'					'2199'	'3alpha,7alpha,26-Trihydroxy-5beta-cholestane+NAD+ ST = LT 3alpha,7alpha-Dihydroxy-5beta-cholestan-26-al+NADH'
'm821'	'Prostaglandin E2'					'2201'	'3alpha,7alpha-Dihydroxy-5beta-cholestane+NADPH+Oxygen+H+ ST = LT 3alpha,7alpha,26-Trihydroxy-5beta-cholestane+NADP++H2O'
'm822'	'Prostaglandin E2'					'2203'	'3alpha,7alpha,12alpha-Trihydroxy-5beta-cholestane+Oxygen+NADPH +H+=3alpha,7alpha,12alpha,26-Tetrahydroxy-5beta-cholestane +NADP++H2O'
'm823'	'Prostaglandin D2'					'2205'	'Propanoyl-CoA+Chenodeoxyglycocholoyl-CoA=CoA +3alpha,7alpha-Dihydroxy-5beta-24-oxocholestanoyl-CoA'
'm824'	'Prostaglandin D2'					'2207'	'3alpha,7alpha-Dihydroxy-5beta-cholestane+NAD+ ST = LT 7alpha-Hydroxy-5beta-cholestan-3-one+NADH+H+ (reversible)'
'm825'	'Prostaglandin D2'					'2209'	'7alpha,12alpha-Dihydroxy-5beta-cholestan-3-one+NADP+ ST = LT 7alpha,12alpha-Dihydroxycholest-4-en-3-one+NADPH+H+'
'm826'	'Prostaglandin D2'					'2210'	'3alpha,7alpha,12alpha-Trihydroxy-5beta-cholestane+NAD+ ST = LT 7alpha,12alpha-Dihydroxy-5beta-cholestan-3-one+NADH+H+ (reversible)'
'm827'	'Prostaglandin I2'					'2223'	'Tetrahydrocorticosterone+NADP+ ST = LT 11beta,21-Dihydroxy-5beta-pregnane-3,20-dione+NADPH+H+ (reversible)'
'm828'	'Prostaglandin I2'					'2225'	'Tetrahydrocorticosterone+NAD+ ST = LT 3alpha,21-Dihydroxy-5beta-pregnane-11,20-dione+NADH+H+'
'm829'	'Thromboxane A2'					'2226'	'Tetrahydrocorticosterone+NADP+ ST = LT 3alpha,21-Dihydroxy-5beta-pregnane-11,20-dione+NADPH+H+'
'm830'	'Thromboxane A2'					'2227'	'Tetrahydrocorticosterone+NADP+ ST = LT 3alpha,21-Dihydroxy-5beta-pregnane-11,20-dione+NADPH+H+'
'm831'	'(13E)-11alpha-Hydroxy-9,15-dioxoprost-13-enoate'					'2228'	'21-Hydroxy-5beta-pregnane-3,11,20-trione+Acceptor ST = LT 11-Dehydrocorticosterone+Reduced acceptor'
'm832'	'(5Z)-(15S)-11alpha-Hydroxy-9,15-dioxoprostanoate'					'2229'	'3alpha,21-Dihydroxy-5beta-pregnane-11,20-dione+NAD+ ST = LT 21-Hydroxy-5beta-pregnane-3,11,20-trione+NADH+H+'
'm833'	'20-OH-Leukotriene B4'					'2234'	'11-Deoxycortisol+H++NADH=17alpha,21-Dihydroxypregnenolone +NAD+'
'm834'	'20-OH-Leukotriene B4'					'2235'	'11-Deoxycortisol+H++NADH=17alpha,21-Dihydroxypregnenolone +NAD+ (reversible)'
'm835'	'Lipoxin A4'					'2242'	'21-Deoxycortisol+Acceptor+H2O=11beta-Hydroxyprogesterone +Reduced acceptor+Oxygen'
'm836'	'Lipoxin A4'					'2243'	'21-Deoxycortisol+Acceptor+H2O=11beta-Hydroxyprogesterone +Reduced acceptor+Oxygen'
'm837'	'Lipoxin A4'					'2244'	'20alpha-Hydroxycholesterol+NADPH+H++Oxygen ST = LT 17alpha,20alpha-Dihydroxycholesterol+NADP++H2O'
'm838'	'Lipoxin B4'					'2246'	'20alpha-Hydroxycholesterol+NADPH+H++Oxygen ST = LT 17alpha,20alpha-Dihydroxycholesterol+NADP++H2O'
'm839'	'Lipoxin B4'					'2248'	'20alpha-Hydroxycholesterol+NADPH+H++Oxygen ST = LT 20alpha,22beta-Dihydroxycholesterol+NADP++H2O'
'm840'	'Lipoxin B4'					'2250'	'22beta-Hydroxycholesterol+NADPH+H++Oxygen ST = LT 20alpha,22beta-Dihydroxycholesterol+NADP++H2O'
'm841'	'Prostaglandin G2'					'2251'	'Sulfatide+H2O=Galactosylceramide+Sulfate'
'm842'	'ganglioside GM4'					'2252'	'Sulfatide+H2O=Galactosylceramide+Sulfate'
'm843'	'12-HETrE'					'2278'	'3-Methoxytyramine+H2O+Oxygen ST = LT 3-Methoxy-4-hydroxyphenylacetaldehyde+H2O2+NH3'
'm844'	'10,11-dihydro-leukotriene B4'					'2279'	'3-Methoxy-4-hydroxyphenylglycolaldehyde+NAD++H2O ST = LT 3-Methoxy-4-hydroxymandelate+NADH+H+'
'm845'	'10,11-dihydro-leukotriene B4'					'2280'	'3-Methoxy-4-hydroxyphenylglycolaldehyde+NAD++H2O ST = LT 3-Methoxy-4-hydroxymandelate+NADH+H+'
'm846'	'10,11-dihydro-leukotriene B4'					'2282'	'3-Methoxy-4-hydroxyphenylglycolaldehyde+NADP++H2O ST = LT 3-Methoxy-4-hydroxymandelate+NADPH+H+'
'm847'	'10,11-dihydro-leukotriene B4'					'2283'	'L-Normetanephrine+H2O+Oxygen ST = LT 3-Methoxy-4-hydroxyphenylglycolaldehyde+NH3+H2O2'
'm848'	'10,11-dihydro-12-epi-leukotriene B4'					'2284'	'L-Normetanephrine+H2O+Oxygen ST = LT 3-Methoxy-4-hydroxyphenylglycolaldehyde+NH3+H2O2'
'm849'	'10,11-dihydro-12-epi-leukotriene B4'					'2286'	'L-Metanephrine+H2O+Oxygen ST = LT 3-Methoxy-4-hydroxyphenylglycolaldehyde+H2O2+Methylamine'
'm850'	'10,11-dihydro-12-epi-leukotriene B4'					'2287'	'5-Hydroxyindoleacetaldehyde+NAD++H2O=5-Hydroxyindoleacetate+ H++NADH'
'm851'	'6,7-dihydro-12-epi-LTB4'					'2325'	'Bilirubin beta-diglucuronide+2 H2O+6 H+=D-Urobilinogen+2D-Glucuronate'
'm852'	'6,7-dihydro-12-epi-LTB4'					'2329'	'GDP-D-mannose+G00003=GDP+G00004'
'm853'	'6,7-dihydro-leukotriene B4'					'2340'	'N4-Acetylaminobutanal+NAD++H2O=4-Acetamidobutanoate+NADH +H+'
'm854'	'6,7-dihydro-leukotriene B4'					'2341'	'N4-Acetylaminobutanal+NAD++H2O=4-Acetamidobutanoate+NADH +H+'
'm855'	'20-OH-10,11-dihydro-leukotriene B4'					'2343'	'L-erythro-4-Hydroxyglutamate+NAD+=L-4-Hydroxyglutamatesemialdehyde+NADH+H2O'
'm856'	'13,14-dihydro- lipoxin A4'					'2345'	'L-erythro-4-Hydroxyglutamate+2-Oxoglutarate ST = LT D-4-Hydroxy-2-oxoglutarate+L-Glutamate'
'm857'	'5,9,11-trihydroxyprosta-6E,14Z-dien-1-oate'					'2346'	'(S)-3-Hydroxyisobutyryl-CoA+H2O=CoA+(S)-3-Hydroxyisobutyrate (reversible)'
'm858'	'prostaglandin H1'					'2347'	'(S)-3-Hydroxyisobutyrate+NAD+=(S)-Methylmalonate semialdehyde+ NADH+H+'
'm859'	'13,14-dihydro-15-oxo-PGE1'					'2349'	'3''-Phosphoadenylyl sulfate+Digalactosylceramide=Adenosine3'',5''-bisphosphate+Digalactosylceramidesulfate'
'm860'	'10,11-dihydro-20-dihydroxy-LTB4'					'2350'	'3''-Phosphoadenylyl sulfate+Digalactosylceramide=Adenosine3'',5''-bisphosphate+Digalactosylceramidesulfate'
'm861'	'prostaglandin G1'					'2359'	'CMP-N-acetylneuraminate+GD1b=CMP+GT1b'
'm862'	'10,11-dihydro-20-trihydroxy-leukotriene B4'					'2368'	'n-1 ATP+10-Formyltetrahydrofolyl L-glutamate+n-1 L-Glutamate ST = LT n-1 ADP+n-1 Orthophosphate+10-Formyltetrahydrofolylpolyglutamate'
'm863'	'5,6-DHET'					'2369'	'n-1 ATP+10-Formyltetrahydrofolyl L-glutamate+n-1 L-Glutamate ST = LT n-1 ADP+n-1 Orthophosphate+10-Formyltetrahydrofolylpolyglutamate'
'm864'	'5,6-DHET'					'2371'	'Diacylglycerol+H2O=Acylglycerol+Carboxylate'
'm865'	'5,6-DHET'					'2380'	'n UDP-N-acetyl-D-glucosamine+n UDPglucuronate=Hyaluronate+2nUDP'
'm866'	'8,9-DHET'					'2381'	'n UDP-N-acetyl-D-glucosamine+n UDPglucuronate=Hyaluronate+2nUDP'
'm867'	'8,9-DHET'					'2383'	'4,8,12-Trimethyltridecanoyl-CoA+Propanoyl-CoA ST = LT 3-Oxopristanoyl-CoA+CoA'
'm868'	'8,9-DHET'					'2390'	'Parathion+H2O=Diethylthiophosphoric acid+4-Nitrophenol'
'm869'	'11,12-DHET'					'2392'	'Paraoxon+H2O=Diethylphosphoric acid+4-Nitrophenol'
'm870'	'11,12-DHET'					'2394'	'D-Gal alpha 1- LT 6D-Gal alpha 1- LT 6D-Glucose+H2O=D-Galactose +Melibiose'
'm871'	'11,12-DHET'					'2398'	'trans,trans-Farnesyl diphosphate+Isopentenyl diphosphate ST = LT trans,trans,cis-Geranylgeranyl diphosphate+Pyrophosphate'
'm872'	'14,15-DHET'					'2399'	'trans,trans,cis-Geranylgeranyl diphosphate+Isopentenyl diphosphate ST = LT Dehydrodolichol diphosphate+Pyrophosphate'
'm873'	'14,15-DHET'					'2408'	'Crotonoyl-CoA+H2O=3-Hydroxybutanoyl-CoA'
'm874'	'14,15-DHET'					'2412'	'14-Demethyllanosterol+NADP+ ST = LT 4,4-Dimethyl-5alpha-cholesta-8,14,24-trien-3beta-ol+NADPH+H+ (reversible)'
'm875'	'Prostaglandin F2alpha'					'2418'	'Phytanoyl-CoA+2-Oxoglutarate+Oxygen=2-Hydroxyphytanoyl-CoA +Succinate+CO2'
'm876'	'Alprostadil'					'2435'	'ATP+1-Phosphatidyl-1D-myo-inositol 4-phosphate=ADP +1-Phosphatidyl-1D-myo-inositol 3,4-bisphosphate'
'm877'	'(5Z,9E,14Z)-(8xi,11xi,12S)-8,11,12-Trihydroxyicosa-5,9,14-trienoate'					'2436'	'ATP+1-Phosphatidyl-1D-myo-inositol 4-phosphate=ADP +1-Phosphatidyl-1D-myo-inositol 3,4-bisphosphate'
'm878'	'11,12,15-THETA'					'2437'	'ATP+1-Phosphatidyl-1D-myo-inositol 4-phosphate=ADP +1-Phosphatidyl-1D-myo-inositol 3,4-bisphosphate'
'm879'	'11,14,15-THETA'					'2438'	'ATP+1-Phosphatidyl-1D-myo-inositol 4-phosphate=ADP +1-Phosphatidyl-1D-myo-inositol 3,4-bisphosphate'
'm880'	'Thromboxane B2'					'2441'	'ATP+myo-Inositol hexakisphosphate=ADP+1-Diphosinositolpentakisphosphate'
'm881'	'13,14-dihydro-PGE1'					'2444'	'ATP+D-myo-Inositol 1,4,5-trisphosphate=ADP+1D-myo-Inositol1,4,5,6-tetrakisphosphate'
'm882'	'Dolichol'					'2445'	'ATP+1D-myo-Inositol 1,4,5,6-tetrakisphosphate=ADP +1D-myo-Inositol 1,3,4,5,6-pentakisphosphate'
'm883'	'Geranylgeranyl diphosphate'					'2454'	'UDP-N-acetyl-D-galactosamine+Protein serine=UDP+Tn antigen'
'm884'	'trans,trans,cis-Geranylgeranyl diphosphate'					'2473'	'UDP-D-xylose+Protein serine=UDP+G00154'
'm885'	'Dehydrodolichol diphosphate'					'2474'	'UDP-D-galactose+G00154=UDP+G00155'
'm886'	'Dolichyl phosphate'					'2475'	'UDP-D-galactose+G00154=UDP+G00155'
'm887'	'Dolichyl phosphate'					'2476'	'UDP-D-galactose+G00155=UDP+G00156'
'm888'	'arachidate'					'2477'	'UDP-D-galactose+G00155=UDP+G00156'
'm889'	'Phytanate'					'2489'	'CMP-N-acetylneuraminate+GD3=CMP+GT3'
'm890'	'Phytanate'					'2498'	'CMP-N-acetylneuraminate+GA1=CMP+GM1b'
'm891'	'Deamino-NAD+'					'2499'	'CMP-N-acetylneuraminate+GA1=CMP+GM1b'
'm892'	'Deamino-NAD+'					'2503'	'H2O+Globotriaosylceramide=alpha-D-Galactose+Lactosylceramide'
'm893'	'Deamino-NAD+'					'2504'	'H2O+Globotriaosylceramide=alpha-D-Galactose+Lactosylceramide'
'm894'	'gama-CEHC-glucuronide'					'2505'	'H2O+Globotriaosylceramide=alpha-D-Galactose+Lactosylceramide'
'm895'	'gama-CEHC-glucuronide'					'2509'	'CMP-N-acetylneuraminate+Galactosylgloboside=CMP +Monosialylgalactosylgloboside'
'm896'	'NAD+'					'2514'	'UDP-N-acetyl-D-glucosamine+nLc6Cer=UDP+nLc7Cer'
'm897'	'NAD+'					'2517'	'UDP-D-galactose+Lc3Cer=UDP+Paragloboside'
'm898'	'NAD+'					'2522'	'H2O+G00171=D-Glucose+G00010'
'm899'	'NAD+'					'2523'	'H2O+G00171=D-Glucose+G00010'
'm900'	'NAD+'					'2525'	'H2O+G00010=D-Glucose+G00011'
'm901'	'NAD+'					'2526'	'H2O+G00010=D-Glucose+G00011'
'm902'	'11-Dehydrocorticosterone'					'2528'	'G00011+4 H2O=G00012+4 D-Mannose'
'm903'	'11-Dehydrocorticosterone'					'2533'	'G00013+2 H2O=G00014+2 D-Mannose'
'm904'	'Cortisone'					'2539'	'UDP-N-acetyl-D-glucosamine+G00015=UDP+G00020'
'm905'	'Cortisone'					'2542'	'GDP-L-fucose+G00015=GDP+G00016'
'm906'	'Aldosterone'					'2544'	'2 UDP-D-galactose+G00016=2 UDP+G00017'
'm907'	'Aldosterone'					'2556'	'GDP-L-fucose+Paragloboside=GDP+IV2Fuc-nLc4Cer'
'm908'	'NADH'					'2564'	'GDP-L-fucose+G00057=GDP+Type IIIH glycolipid'
'm909'	'NADH'					'2568'	'GDP-L-fucose+nLc6Cer=GDP+VI2Fuc-nLc6 (reversible)'
'm910'	'NADH'					'2569'	'GDP-L-fucose+nLc6Cer=GDP+VI2Fuc-nLc6'
'm911'	'NADH'					'2571'	'CMP-N-acetylneuraminate+nLc6Cer=CMP+VI3NeuAc-nLc6Cer'
'm912'	'NADH'					'2572'	'GDP-L-fucose+nLc6Cer=GDP+V3Fuc-nLc6Cer'
'm913'	'NADH'					'2573'	'GDP-L-fucose+nLc6Cer=GDP+V3Fuc-nLc6Cer (reversible)'
'm914'	'NADP+'					'2575'	'GDP-L-fucose+nLc8Cer=GDP+G00084'
'm915'	'NADP+'					'2577'	'GDP-L-fucose+G00073=GDP+G00074'
'm916'	'NADP+'					'2580'	'GDP-L-fucose+VI2Fuc-nLc6=GDP+G00081 (reversible)'
'm917'	'NADP+'					'2581'	'GDP-L-fucose+VI2Fuc-nLc6=GDP+G00081'
'm918'	'NADP+'					'2589'	'G00005+GDP-D-mannose=G10526+GDP'
'm919'	'NADP+'					'2590'	'G10526+GDP-D-mannose=G00006+GDP'
'm920'	'18-carboxy-dinor-LTE4'					'2594'	'GDP-L-fucose+Lc4Cer=GDP+Fuc-Lc4Cer (reversible)'
'm921'	'NADPH'					'2595'	'GDP-L-fucose+Lc4Cer=GDP+Fuc-Lc4Cer'
'm922'	'NADPH'					'2597'	'GDP-L-fucose+Lc4Cer=GDP+IV2Fuc-Lc4Cer'
'm923'	'NADPH'					'2599'	'GDP-L-fucose+Lc4Cer=GDP+IV2Fuc-Lc4Cer'
'm924'	'NADPH'					'2601'	'GDP-L-fucose+Type IA glycolipid=GDP+G00043'
'm925'	'NADPH'					'2604'	'GDP-L-fucose+IV2Fuc-Lc4Cer=GDP+IV2Fuc,III4Fuc-Lc4Cer'
'm926'	'NADPH'					'2607'	'GDP-L-fucose+Type IB glycolipid=GDP+G00040'
'm927'	'Progesterone'					'2608'	'GDP-L-fucose+Type IB glycolipid=GDP+G00040'
'm928'	'Progesterone'					'2610'	'GDP-L-fucose+3''-isoLM1=GDP+Fuc-3''-isoLM1'
'm929'	'Progesterone'					'2618'	'UDP-D-galactose+Lc4Cer=UDP+G00038'
'm930'	'pregn-5-ene-3,20-dione'					'2619'	'GDP-L-fucose+G00038=GDP+Type IB glycolipid'
'm931'	'17alpha-Hydroxyprogesterone'					'2620'	'GDP-L-fucose+G00038=GDP+Type IB glycolipid'
'm932'	'17alpha-Hydroxyprogesterone'					'2626'	'UDP-N-acetyl-D-glucosamine+nLc6Cer=UDP+G00077'
'm933'	'17alpha-Hydroxyprogesterone'					'2646'	'GDP-L-fucose+G00081=GDP+G00082 (reversible)'
'm934'	'11-Deoxycorticosterone'					'2649'	'GDP-D-mannose+G00004=GDP+G00005'
'm935'	'11-Deoxycorticosterone'					'2651'	'Dolichyl phosphate D-mannose+G00006=Dolichyl phosphate +G10595'
'm936'	'11-Deoxycorticosterone'					'2653'	'Dolichyl phosphate D-mannose+G10595=Dolichyl phosphate +G10596'
'm937'	'11beta-Hydroxyprogesterone'					'2655'	'Dolichyl phosphate D-mannose+G10596=Dolichyl phosphate +G10597'
'm938'	'11beta-Hydroxyprogesterone'					'2657'	'Dolichyl phosphate D-mannose+G10597=Dolichyl phosphate +G00007'
'm939'	'Corticosterone'					'2669'	'Sphingosine 1-phosphate=Ethanolamine phosphate+Hexadecanal (reversible)'
'm940'	'Corticosterone'					'2670'	'Sphingosine 1-phosphate=Ethanolamine phosphate+Hexadecanal'
'm941'	'Corticosterone'					'2672'	'Dihydroceramide+H2O=Fatty acid+Sphinganine'
'm942'	'21-Hydroxy-5beta-pregnane-3,11,20-trione'					'2673'	'Dihydroceramide+H2O=Fatty acid+Sphinganine'
'm943'	'11-Deoxycortisol'					'2675'	'Dihydroceramide+H2O=Fatty acid+Sphinganine'
'm944'	'11-Deoxycortisol'					'2676'	'Sphinganine 1-phosphate+H2O=Sphinganine+Orthophosphate'
'm945'	'11-Deoxycortisol'					'2677'	'Sphinganine 1-phosphate+H2O=Sphinganine+Orthophosphate'
'm946'	'21-Deoxycortisol'					'2678'	'Sphinganine 1-phosphate+H2O=Sphinganine+Orthophosphate'
'm947'	'21-Deoxycortisol'					'2679'	'Sphingosine 1-phosphate+H2O=Sphingosine+Orthophosphate'
'm948'	'Cortisol'					'2680'	'Sphingosine 1-phosphate+H2O=Sphingosine+Orthophosphate'
'm949'	'Cortisol'					'2681'	'Sphingosine 1-phosphate+H2O=Sphingosine+Orthophosphate'
'm950'	'18-Hydroxycorticosterone'					'2682'	'Ceramide 1-phosphate+H2O=N-Acylsphingosine+Orthophosphate'
'm951'	'17alpha,21-Dihydroxy-5beta-pregnane-3,11,20-trione'					'2683'	'Ceramide 1-phosphate+H2O=N-Acylsphingosine+Orthophosphate'
'm952'	'11beta,21-Dihydroxy-3,20-oxo-5beta-pregnan-18-al'					'2684'	'Ceramide 1-phosphate+H2O=N-Acylsphingosine+Orthophosphate'
'm953'	'7''-carboxy-alpha-chromanol'					'2693'	'Cocaine+H2O=Ecgonine methyl ester+Benzoate'
'm954'	'7''-carboxy-alpha-chromanol'					'2702'	'4-Hydroxyphenyl acetate+H2O=Hydroquinone+Acetate'
'm955'	'pregnenolone sulfate'					'2704'	'(3S)-3-Hydroxyadipyl-CoA+NAD+=3-Oxoadipyl-CoA+NADH+H+'
'm956'	'pregnenolone sulfate'					'2706'	'5-Carboxy-2-pentenoyl-CoA+H2O=(3S)-3-Hydroxyadipyl-CoA (reversible)'
'm957'	'pregnenolone sulfate'					'2709'	'trans-Hex-2-enoyl-CoA+NADPH+H+=Hexanoyl-CoA+NADP+'
'm958'	'pregnenolone sulfate'					'2711'	'Naphthalene+NADPH+Oxygen+H+=(1R,2S)-Naphthalene 1,2-oxide+ NADP++H2O'
'm959'	'17alpha-hydroxypregnenolone sulfate'					'2712'	'Naphthalene+NADPH+Oxygen+H+=(1S,2R)-Naphthalene 1,2-oxide+ NADP++H2O'
'm960'	'17alpha-hydroxypregnenolone sulfate'					'2713'	'Naphthalene+NADPH+Oxygen+H+=(1S,2R)-Naphthalene 1,2-oxide+ NADP++H2O'
'm961'	'17alpha-hydroxypregnenolone sulfate'					'2715'	'(1R,2S)-Naphthalene 1,2-oxide+Glutathione ST = LT (1R)-Hydroxy-(2R)-glutathionyl-1,2-dihydronaphthalene'
'm962'	'17alpha-hydroxypregnenolone sulfate'					'2717'	'(1S,2R)-Naphthalene 1,2-oxide+Glutathione ST = LT (1R)-Glutathionyl-(2R)-hydroxy-1,2-dihydronaphthalene'
'm963'	'Pregnenolone'					'2718'	'(1S,2R)-Naphthalene 1,2-oxide+Glutathione ST = LT (1R)-Glutathionyl-(2R)-hydroxy-1,2-dihydronaphthalene'
'm964'	'Pregnenolone'					'2721'	'(1S,2R)-Naphthalene 1,2-oxide+Glutathione ST = LT (1S)-Hydroxy-(2S)-glutathionyl-1,2-dihydronaphthalene'
'm965'	'Pregnenolone'					'2729'	'(1R,2S)-Naphthalene 1,2-oxide=beta-Naphthol'
'm966'	'Pregnenolone'					'2731'	'(1R,2S)-Naphthalene 1,2-oxide+H2O ST = LT 1,2-Dihydronaphthalene-1,2-diol'
'm967'	'Pregnenolone'					'2732'	'(1R,2S)-Naphthalene 1,2-oxide+H2O ST = LT 1,2-Dihydronaphthalene-1,2-diol'
'm968'	'20alpha-Hydroxy-4-pregnen-3-one'					'2733'	'(1R,2S)-Naphthalene 1,2-oxide+H2O ST = LT 1,2-Dihydronaphthalene-1,2-diol'
'm969'	'20alpha-Hydroxy-4-pregnen-3-one'					'2734'	'(1S,2R)-Naphthalene 1,2-oxide+H2O ST = LT 1,2-Dihydronaphthalene-1,2-diol'
'm970'	'5beta-Pregnane-3,20-dione'					'2735'	'(1S,2R)-Naphthalene 1,2-oxide+H2O ST = LT 1,2-Dihydronaphthalene-1,2-diol'
'm971'	'5beta-Pregnane-3,20-dione'					'2736'	'(1S,2R)-Naphthalene 1,2-oxide+H2O ST = LT 1,2-Dihydronaphthalene-1,2-diol'
'm972'	'5beta-Pregnane-3,20-dione'					'2740'	'1,2-Dihydronaphthalene-1,2-diol+NADPH+Oxygen+H+ ST = LT 1,2-Dihydroxy-3,4-epoxy-1,2,3,4-tetrahydronaphthalene+NADP++H2O'
'm973'	'17alpha,20alpha-Dihydroxypregn-4-en-3-one'					'2745'	'beta-Naphthol+NADPH+Oxygen+H+=Naphthalene-1,2-diol+NADP++ H2O'
'm974'	'17alpha-Hydroxypregnenolone'					'2768'	'2 Glutathione+5(S)-HPETE=Oxidized glutathione+5(S)-HETE +H2O'
'm975'	'17alpha-Hydroxypregnenolone'					'2770'	'2 Glutathione+5(S)-HPETE=Oxidized glutathione+5(S)-HETE +H2O'
'm976'	'17alpha-Hydroxypregnenolone'					'2772'	'2 Glutathione+15(S)-HPETE=Oxidized glutathione +(15S)-15-Hydroxy-5,8,11-cis-13-trans-eicosatetraenoate+H2O'
'm977'	'17alpha-Hydroxypregnenolone'					'2777'	'(5Z,8Z,11Z,14Z)-Icosatetraenoic acid+Oxygen+NADPH+H+ ST = LT 20-HETE+NADP++H2O'
'm978'	'17alpha-Hydroxypregnenolone'					'2779'	'15(S)-HPETE=15H-11,12-EETA'
'm979'	'21-Hydroxypregnenolone'					'2781'	'15(S)-HPETE=11H-14,15-EETA'
'm980'	'17-_AND_alpha;-hydroxypregnenolone'					'2783'	'15H-11,12-EETA+H2O=11,12,15-THETA'
'm981'	'11beta,21-Dihydroxy-5beta-pregnane-3,20-dione'					'2785'	'11H-14,15-EETA+H2O=11,14,15-THETA'
'm982'	'3alpha,21-Dihydroxy-5beta-pregnane-11,20-dione'					'2787'	'(5Z,8Z,11Z,14Z)-Icosatetraenoic acid+Oxygen+NADPH+H+ ST = LT 19(S)-HETE+NADP++H2O'
'm983'	'3alpha,21-Dihydroxy-5beta-pregnane-11,20-dione'					'2788'	'(5Z,8Z,11Z,14Z)-Icosatetraenoic acid+Oxygen+NADPH+H+ ST = LT 14,15-EET+NADP++H2O'
'm984'	'17alpha,21-Dihydroxypregnenolone'					'2789'	'(5Z,8Z,11Z,14Z)-Icosatetraenoic acid+Oxygen+NADPH+H+ ST = LT 14,15-EET+NADP++H2O'
'm985'	'17alpha,21-Dihydroxypregnenolone'					'2791'	'(5Z,8Z,11Z,14Z)-Icosatetraenoic acid+Oxygen+NADPH+H+ ST = LT 11,12-EET+NADP++H2O'
'm986'	'11beta,17alpha,21-Trihydroxy-5beta-pregnane-3,20-dione'					'2793'	'(5Z,8Z,11Z,14Z)-Icosatetraenoic acid+Oxygen+NADPH+H+ ST = LT 8,9-EET+NADP++H2O'
'm987'	'3-beta-D-Galactosyl-4-beta-D-galactosyl-O-beta-D-xylosylprotein'					'2795'	'(5Z,8Z,11Z,14Z)-Icosatetraenoic acid+Oxygen+NADPH+H+ ST = LT 5,6-EET+NADP++H2O'
'm988'	'3-beta-D-Galactosyl-4-beta-D-galactosyl-O-beta-D-xylosylprotein'					'2797'	'(5Z,8Z,11Z,14Z)-Icosatetraenoic acid+Oxygen+NADPH+H+ ST = LT 16(R)-HETE+NADP++H2O'
'm989'	'Tetrahydrocorticosterone'					'2798'	'Linoleate+Oxygen+NADPH+H+=9(10)-EpOME+NADP++H2O'
'm990'	'Tetrahydrocorticosterone'					'2800'	'Linoleate+Oxygen+NADPH+H+=12(13)-EpOME+NADP++H2O'
'm991'	'Dephospho-CoA'					'2804'	'Linoleate+Oxygen=9(S)-HPODE'
'm992'	'CoA'					'2808'	'Linoleate+Reduced acceptor+Oxygen ST = LT (6Z,9Z,12Z)-Octadecatrienoic acid+Acceptor+2 H2O'
'm993'	'CoA'					'2824'	'Bromobenzene-3,4-oxide+H2O=Bromobenzene-3,4-dihydrodiol'
'm994'	'CoA'					'2825'	'Bromobenzene-3,4-oxide+H2O=Bromobenzene-3,4-dihydrodiol'
'm995'	'CoA'					'2826'	'Bromobenzene-3,4-oxide+H2O=Bromobenzene-3,4-dihydrodiol'
'm996'	'CoA'					'2830'	'Bromobenzene-3,4-oxide=4-Bromophenol'
'm997'	'CoA'					'2833'	'4-Bromophenol+NADPH+Oxygen+H+=4-Bromophenol-2,3-epoxide +NADP++H2O'
'm998'	'CoA'					'2834'	'4-Bromophenol-2,3-epoxide=4-Bromocatechol'
'm999'	'CoA'					'2836'	'Bromobenzene-3,4-dihydrodiol=4-Bromocatechol (reversible)'
'm1000'	'alpha-mannose-glucosaminyl-acyl-phosphatidylinositol'					'2843'	'Benzo[a]pyrene-7,8-oxide+H2O=Benzo[a]pyrene-7,8-diol'
'm1001'	'IsoGlobotriasyl ceramide'					'2844'	'Benzo[a]pyrene-7,8-oxide+H2O=Benzo[a]pyrene-7,8-diol'
'm1002'	'alpha-CEHC-glucuronide'					'2845'	'Benzo[a]pyrene-7,8-oxide+H2O=Benzo[a]pyrene-7,8-diol'
'm1003'	'alpha-CEHC-glucuronide'					'2865'	'1,1-Dichloroethylene epoxide+Glutathione ST = LT 2-(S-Glutathionyl)acetyl chloride+HCl'
'm1004'	'2-(S-Glutathionyl)acetyl glutathione'					'2871'	'2-(S-Glutathionyl)acetyl chloride+Glutathione ST = LT 2-(S-Glutathionyl)acetyl glutathione+HCl'
'm1005'	'N-arachidonoylglycine'					'2893'	'14,15-EET+H2O=14,15-DHET'
'm1006'	'N-Acetyl-alpha-D-glucosaminyl-(1-_LT_4)-beta-D-glucuronosyl-(1-_LT_4)-N- acetyl-alpha-D-glucosaminylproteoglycan'					'2894'	'14,15-EET+H2O=14,15-DHET'
'm1007'	'Acyl-CoA'					'2895'	'14,15-EET+H2O=14,15-DHET'
'm1008'	'Acyl-CoA'					'2896'	'11,12-EET+H2O=11,12-DHET'
'm1009'	'Acyl-CoA'					'2897'	'11,12-EET+H2O=11,12-DHET'
'm1010'	'15-oxo-Prostaglandin E2 ethanolamide'					'2898'	'11,12-EET+H2O=11,12-DHET'
'm1011'	'Formyl-CoA'					'2899'	'8,9-EET+H2O=8,9-DHET'
'm1012'	'beta-D-Galactosyl-1,3-(N-acetyl-beta-D-glucosaminyl-1,6)-N-acetyl-D- galactosaminyl-R'					'2900'	'8,9-EET+H2O=8,9-DHET'
'm1013'	'Anandamide'					'2901'	'8,9-EET+H2O=8,9-DHET'
'm1014'	'Anandamide'					'2902'	'5,6-EET+H2O=5,6-DHET'
'm1015'	'12(S)-hydroxyarachidonylethanolamide'					'2903'	'5,6-EET+H2O=5,6-DHET'
'm1016'	'15(S)-hydroxyarachidonylethanolamide'					'2904'	'5,6-EET+H2O=5,6-DHET'
'm1017'	'Prostaglandin E2 ethanolamide'					'2908'	'1,2-Dibromoethane+Glutathione=Glutathione episulfonium ion+2Hydrobromic acid'
'm1018'	'Prostaglandin E2 ethanolamide'					'2913'	'2-Bromoacetaldehyde+Glutathione=S-(Formylmethyl)glutathione +Hydrobromic acid'
'm1019'	'20-COOH-leukotriene E4'					'2922'	'UDP-N-acetyl-D-glucosamine+G00157=UDP+G00162'
'm1020'	'20-oxo-leukotriene E4'					'2924'	'G00144+H2O=6-(alpha-D-glucosaminyl)-1D-myo-inositol +Phosphatidate'
'm1021'	'Leukotriene E4'					'2925'	'O(,2)+L-tyrosine+L-dopa=H(,2)O+L-dopa+Dopaquinone'
'm1022'	'Leukotriene E4'					'2926'	'O(,2)+L-tyrosine+L-dopa=H(,2)O+L-dopa+Dopaquinone'
'm1023'	'20-Hydroxyleukotriene E4'					'2928'	'`S`-adenosyl-L-methionine+phosphatidyl-`N`-methylethanolamine=`S`-adenosyl-L-homocysteine+phosphatidyl-`N`,`N`-dimethylethanolamine+H(''+)'
'm1024'	'1-lyso-2-arachidonoyl-phosphatidate'					'2930'	'acetyl-CoA+D-glucosamine 1-phosphate=CoA+`N`-acetyl-D-glucosamine 1-phosphate (reversible)'
'm1025'	'1-lyso-2-arachidonoyl-phosphatidate'					'2931'	'acetyl-CoA+D-glucosamine 1-phosphate=CoA+`N`-acetyl-D-glucosamine 1-phosphate'
'm1026'	'1-lyso-2-arachidonoyl-phosphatidate'					'2932'	'ATP+D-gluconate=ADP+6-phospho-D-gluconate+H(''+) (reversible)'
'm1027'	'Acetyl-CoA'					'2934'	'cyanide+H(''+)+3-mercaptopyruvate=pyruvate+thiocyanate'
'm1028'	'Acetyl-CoA'					'2935'	'D-glucosamine 1-phosphate=D-glucosamine 6-phosphate'
'm1029'	'Acetyl-CoA'					'2937'	'arachidonate+ATP+CoA=AMP+arachidonoyl-CoA+PP(,i)'
'm1030'	'Acetyl-CoA'					'2940'	'H(,2)O+stearoyl-CoA=CoA+H(''+)+stearate'
'm1031'	'2-Arachidonoylglycerol'					'2942'	'H(,2)O+b-D-glucopyranose-6-phosphate=b-D-glucose+Pi (reversible)'
'm1032'	'2-Arachidonoylglycerol'					'2943'	'CoA+a-ketoglutarate+NAD(''+)=CO(,2)+NADH+succinyl-CoA'
'm1033'	'2-Arachidonoylglycerol'					'2944'	'CoA+a-ketoglutarate+NAD(''+)=CO(,2)+NADH+succinyl-CoA'
'm1034'	'12-hydroperoxyeicosatetraenoate glyceryl ester'					'2945'	'L-gulonate+NADP(''+)=D-glucuronate+NADPH+H(''+)'
'm1035'	'ethanolaminephosphate-2-mannosealpha1-4glucosaminyl-acyl-phosphatidylinositol'					'2949'	'a-maltose+H2O=2 alpha-D-Glucose'
'm1036'	'L-Palmitoylcarnitine'					'2954'	'dATP+TDP=dADP+TTP'
'm1037'	'tetrahydrofolate-L-glutamate'					'2956'	'UTP+reduced thioredoxin=dUTP+H(,2)O+oxidized thioredoxin'
'm1038'	'Tetrahydrofolyl-[Glu](2)'					'2957'	'`cis`-3-decenoyl-CoA=`trans`-deca-2-enoyl-CoA'
'm1039'	'Tetrahydrofolyl-[Glu](2)'					'2958'	'`cis`-3-decenoyl-CoA=`trans`-deca-2-enoyl-CoA'
'm1040'	'nisinate'					'2960'	'NAD(''+)+(3`S`)-3-hydroxylinoleoyl-CoA=3-oxolinoleoyl-CoA+NADH+H(''+)'
'm1041'	'nisinate'					'2961'	'NAD(''+)+(3`S`)-3-hydroxylinoleoyl-CoA=3-oxolinoleoyl-CoA+NADH+H(''+)'
'm1042'	'2,3-Dehydroacyl-CoA'					'2965'	'malonyl-CoA+H(''+)+stearoyl-CoA=CO(,2)+CoA+3-oxoeicosanoyl-CoA'
'm1043'	'trans-2,3-Dehydroacyl-CoA'					'2966'	'NADPH+H(''+)+3-oxoeicosanoyl-CoA=NADP(''+)+3-hydroxyeicosanoyl-CoA'
'm1044'	'3-Oxoacyl-CoA'					'2967'	'3-hydroxyeicosanoyl-CoA=H(,2)O+`trans`-eicos-2-enoyl-CoA'
'm1045'	'6,9,12,15,18-all-cis-tetracosapentaenoate'					'2968'	'NADPH+H(''+)+`trans`-eicos-2-enoyl-CoA=NADP(''+)+eicosanoyl-CoA'
'm1046'	'9''-carboxy-alpha-chromanol'					'2970'	'malonyl-CoA+H(''+)+eicosanoyl-CoA=CO(,2)+CoA+3-oxodocosanoyl-CoA'
'm1047'	'9''-carboxy-alpha-chromanol'					'2971'	'NADPH+H(''+)+3-oxodocosanoyl-CoA=NADP(''+)+3-hydroxydocosanoyl-CoA'
'm1048'	'Propenoyl-CoA'					'2972'	'3-hydroxydocosanoyl-CoA=H(,2)O+`trans`-docos-2-enoyl-CoA'
'm1049'	'Malonyl-CoA'					'2973'	'NADPH+H(''+)+`trans`-docos-2-enoyl-CoA=NADP(''+)+docosanoyl-CoA'
'm1050'	'Malonyl-CoA'					'2974'	'malonyl-CoA+H(''+)+docosanoyl-CoA=CO(,2)+CoA+3-oxotetracosanoyl-CoA'
'm1051'	'Malonyl-CoA'					'2975'	'NADPH+H(''+)+3-oxotetracosanoyl-CoA=NADP(''+)+3-hydroxytetracosanoyl-CoA'
'm1052'	'Malonyl-CoA'					'2976'	'3-hydroxytetracosanoyl-CoA=H(,2)O+`trans`-tetracos-2-enoyl-CoA'
'm1053'	'Malonyl-CoA'					'2977'	'NADPH+H(''+)+`trans`-tetracos-2-enoyl-CoA=NADP(''+)+tetracosanoyl-CoA'
'm1054'	'Malonyl-CoA'					'2980'	'H(,2)O+eicosanoyl-CoA=arachidate+CoA+H(''+)'
'm1055'	'(3S)-3-Hydroxyacyl-CoA'					'2986'	'H(,2)O+tetracosanoyl-CoA=CoA+H(''+)+lignocerate'
'm1056'	'Propanoyl-CoA'					'2987'	'palmitoyl-CoA+malonyl-CoA+H(''+)=CO(,2)+CoA+3-oxooctadecanoyl-CoA'
'm1057'	'Propanoyl-CoA'					'2988'	'palmitoyl-CoA+malonyl-CoA+H(''+)=CO(,2)+CoA+3-oxooctadecanoyl-CoA'
'm1058'	'Propanoyl-CoA'					'2990'	'NADPH+H(''+)+3-oxooctadecanoyl-CoA=NADP(''+)+3-hydroxyoctadecanoyl-CoA'
'm1059'	'3-Hydroxypropionyl-CoA'					'2993'	'NADPH+H(''+)+`trans`-octadec-2-enoyl-CoA=NADP(''+)+stearoyl-CoA'
'm1060'	'Chenodeoxycholate'					'2994'	'H(,2)O+leukotriene D(,4)=glycine+leukotriene E(,4)'
'm1061'	'Chenodeoxycholate'					'3017'	'tetrahydrobiopterin-4a-carbinolamine=H(,2)O+quinonoid dihydrobiopterin'
'm1062'	'Chenodeoxycholate'					'3023'	'H(,2)O+maltotriose=a-D-glucose+a-maltose'
'm1063'	'3alpha,12alpha-Dihydroxy-5beta-cholanate'					'3024'	'2 glutathione+3,5,3'' - triiodothyronine=H(''+)+iodide+Oxidized glutathione+3,3''-diiodo-L-thyronine'
'm1064'	'3alpha,12alpha-Dihydroxy-5beta-cholanate'					'3026'	'H(,2)O+3,3''-diiodo-L-thyronine 4''-`O`-sulfate=H(''+)+SO4+3,3''-diiodo-L-thyronine (reversible)'
'm1065'	'3alpha,7alpha,12alpha-Trihydroxy-5beta-cholanate'					'3027'	'H(,2)O+3,3''-diiodo-L-thyronine 4''-`O`-sulfate=H(''+)+SO4+3,3''-diiodo-L-thyronine'
'm1066'	'3alpha,7alpha,12alpha-Trihydroxy-5beta-cholanate'					'3028'	'H(,2)O+3,3''-diiodo-L-thyronine 4''-`O`-sulfate=H(''+)+SO4+3,3''-diiodo-L-thyronine'
'm1067'	'3alpha,7alpha,12alpha-Trihydroxy-5beta-cholanate'					'3029'	'2 glutathione+L-Thyroxine=H(''+)+iodide+Oxidized glutathione+3,5,3'' - triiodothyronine'
'm1068'	'3alpha,7alpha,12alpha-Trihydroxy-5beta-cholanate'					'3036'	'2 glutathione+3,3'',5'' - triiodothyronine=H(''+)+iodide+Oxidized glutathione+3'',5''-diiodo-L-thyronine'
'm1069'	'Stachyose'					'3038'	'H(,2)O+maltotetraose=a-D-glucose+maltotriose'
'm1070'	'Psychosine sulfate'					'3041'	'H(,2)O+3'',5''-diiodo-L-thyronine 4''-`O`-sulfate=H(''+)+SO4+3'',5''-diiodo-L-thyronine (reversible)'
'm1071'	'Psychosine sulfate'					'3044'	'2 glutathione+3'',5''-diiodo-L-thyronine=H(''+)+iodide+Oxidized glutathione+3''-monoiodo-L-thyronine'
'm1072'	'Psychosine'					'3047'	'H(,2)O+3''-monoiodo-L-thyronine 4''-`O`-sulfate=H(''+)+SO4+3''-monoiodo-L-thyronine (reversible)'
'm1073'	'Psychosine'					'3063'	'H(,2)O+maltopentaose=a-D-glucose+maltotetraose'
'm1074'	'Psychosine'					'3069'	'H(,2)O+maltohexaose=a-D-glucose+maltopentaose'
'm1075'	'lignocerate'					'3079'	'H(,2)O+maltoheptaose=a-D-glucose+maltohexaose'
'm1076'	'Sphingomyelin'					'3081'	'2 H(,2)O+maltononaose=2 a-D-glucose+maltoheptaose'
'm1077'	'Sphingomyelin'					'3083'	'H(,2)O+maltodecaose=a-D-glucose+maltononaose'
'm1078'	'Sphingomyelin'					'3092'	'prostaglandin H(,2)=malonic dialdehyde+12`S`-HHT'
'm1079'	'10-Formyltetrahydrofolyl L-glutamate'					'3093'	'H(,2)O+thromboxane A(,2)=thromboxane B(,2)'
'm1080'	'10-Formyltetrahydrofolyl L-glutamate'					'3099'	'NADPH+O(,2)+17a-hydroxyprogesterone=acetate+D(''4)-androstenedione+H(,2)O+NADP(''+)'
'm1081'	'10-Formyltetrahydrofolylpolyglutamate'					'3100'	'H(,2)O+17a-hydroxypregnenolone sulfate=17a-hydroxypregnenolone+H(''+)+SO4'
'm1082'	'10-Formyltetrahydrofolylpolyglutamate'					'3101'	'H(,2)O+17a-hydroxypregnenolone sulfate=17a-hydroxypregnenolone+H(''+)+SO4'
'm1083'	'(_ST_i_LT_S_ST_/i_LT_)-3-hydroxy-isobutyryl-CoA'					'3102'	'H(,2)O+17a-hydroxypregnenolone sulfate=17a-hydroxypregnenolone+H(''+)+SO4'
'm1084'	'simvastatin'					'3103'	'H(,2)O+17a-hydroxypregnenolone sulfate=17a-hydroxypregnenolone+H(''+)+SO4'
'm1085'	'Leukotriene D4'					'3104'	'H(,2)O+cholesterol sulfate=cholesterol+H(''+)+SO4'
'm1086'	'Crotonoyl-CoA'					'3105'	'H(,2)O+cholesterol sulfate=cholesterol+H(''+)+SO4'
'm1087'	'2-Methylprop-2-enoyl-CoA'					'3106'	'H(,2)O+cholesterol sulfate=cholesterol+H(''+)+SO4'
'm1088'	'Acetoacetyl-CoA'					'3107'	'H(,2)O+cholesterol sulfate=cholesterol+H(''+)+SO4'
'm1089'	'Acetoacetyl-CoA'					'3109'	'NADPH+O(,2)+17a-hydroxypregnenolone=acetate+dehydroepiandrosterone+H(,2)O+NADP(''+)'
'm1090'	'Succinyl-CoA'					'3110'	'NADPH+O(,2)+17a-hydroxypregnenolone=acetate+dehydroepiandrosterone+H(,2)O+NADP(''+)'
'm1091'	'Succinyl-CoA'					'3112'	'H(,2)O+pregnenolone sulfate=pregnenolone+H(''+)+SO4'
'm1092'	'(S)-Methylmalonyl-CoA'					'3113'	'H(,2)O+pregnenolone sulfate=pregnenolone+H(''+)+SO4'
'm1093'	'(S)-Methylmalonyl-CoA'					'3114'	'H(,2)O+pregnenolone sulfate=pregnenolone+H(''+)+SO4'
'm1094'	'(R)-Methylmalonyl-CoA'					'3115'	'H(,2)O+pregnenolone sulfate=pregnenolone+H(''+)+SO4'
'm1095'	'(R)-Methylmalonyl-CoA'					'3121'	'a-ketoglutarate+L-kynurenine=L-glutamate+H(,2)O+kynurenate+H(''+)'
'm1096'	'simvastatin acid'					'3123'	'acetyl-CoA+spermidine=CoA+H(''+)+`N`(''1)-acetylspermidine'
'm1097'	'alpha-N-Acetylneuraminyl-2,3-beta-D-galactosyl-1,3-N-acetyl-alpha-D- galactosaminyl-R'					'3127'	'acetyl-CoA+`N`(''1)-acetylspermine=CoA+H(''+)+`N`(''1),`N`(''12)-diacetylspermine'
'm1098'	'alpha-N-Acetylneuraminyl-2,3-beta-D-galactosyl-1,3-N-acetyl-alpha-D- galactosaminyl-R'					'3128'	'H(,2)O+H(''+)+D1-piperideine 6-carboxylate=2-aminoadipate semialdehyde (reversible)'
'm1099'	'alpha-N-Acetylneuraminyl-2,3-beta-D-galactosyl-1,3-N-acetyl-alpha-D- galactosaminyl-R'					'3135'	'NADPH+O(,2)+H(''+)+vitamin D(,3)=H(,2)O+NADP(''+)+25-hydroxyvitamin D(,3)'
'm1100'	'alpha-N-Acetylneuraminyl-2,6-beta-D-galactosyl-1,4-N-acetyl-beta-D- glucosamine'					'3137'	'NADH+O(,2)+H(''+)+1a,25-dihydroxyvitamin D(,3)=H(,2)O+NAD(''+)+1a,24`R`,25-trihydroxyvitamin D(,3)'
'm1101'	'Butanoyl-CoA'					'3141'	'NADPH+O(,2)+H(''+)+25-hydroxyvitamin D(,3)=H(,2)O+NADP(''+)+23`S`,25-dihydroxyvitamin D(,3)'
'm1102'	'2-Methylpropanoyl-CoA'					'3143'	'NADH+O(,2)+H(''+)+23`S`,25-dihydroxyvitamin D(,3)=H(,2)O+NAD(''+)+23`S`,25,26-trihydroxyvitamin D(,3)'
'm1103'	'2-Methylpropanoyl-CoA'					'3145'	'O(,2)+23`S`,25,26-trihydroxyvitamin D(,3)=H(,2)O(,2)+25-hydroxyvitamin D(,3)-26,23-lactol'
'm1104'	'(S)-3-Hydroxybutanoyl-CoA'					'3147'	'O(,2)+25-hydroxyvitamin D(,3)-26,23-lactol=H(,2)O(,2)+25-hydroxyvitamin D(,3)-26,23-lactone'
'm1105'	'(R)-3-Hydroxybutanoyl-CoA'					'3154'	'ATP+L-a-Phosphatidylinositol=ADP+H(''+)+1-phosphatidyl-`myo`-inositol 5-phosphate'
'm1106'	'3-Hydroxybutanoyl-CoA'					'3155'	'ATP+L-a-Phosphatidylinositol=ADP+H(''+)+1-phosphatidyl-`myo`-inositol 5-phosphate'
'm1107'	'(S)-3-Hydroxyisobutyryl-CoA'					'3156'	'ATP+L-a-Phosphatidylinositol=ADP+H(''+)+1-phosphatidyl-`myo`-inositol 5-phosphate (reversible)'
'm1108'	'all-trans-Pentaprenyl diphosphate'					'3157'	'ATP+L-a-Phosphatidylinositol=ADP+H(''+)+1-phosphatidyl-`myo`-inositol 5-phosphate'
'm1109'	'Sulfatide'					'3158'	'H(,2)O+1-phosphatidyl-D-`myo`-inositol 4,5-bisphosphate=Pi+1-phosphatidyl-`myo`-inositol 5-phosphate'
'm1110'	'Sulfatide'					'3167'	'ATP+CoA+linoleate=AMP+PP(,i)+linoleoyl-CoA'
'm1111'	'Sulfatide'					'3168'	'ATP+CoA+linoleate=AMP+PP(,i)+linoleoyl-CoA'
'm1112'	'Glucosylceramide'					'3169'	'UDP+reduced glutaredoxin=dUDP+H(,2)O+glutaredoxin (reversible)'
'm1113'	'Glucosylceramide'					'3170'	'UDP+reduced glutaredoxin=dUDP+H(,2)O+glutaredoxin'
'm1114'	'Glucosylceramide'					'3171'	'FAD+linoleoyl-CoA=FADH(,2)+`trans`,`cis`,`cis`-2,9,12-octadecatrienoyl-CoA'
'm1115'	'Glucosylceramide'					'3172'	'FAD+linoleoyl-CoA=FADH(,2)+`trans`,`cis`,`cis`-2,9,12-octadecatrienoyl-CoA'
'm1116'	'Galactosylceramide'					'3173'	'FAD+`cis`,`cis`-palmito-7,10-dienoyl-CoA=FADH(,2)+`trans`,`cis`,`cis`-2,7,10-hexadecatrienoyl-CoA'
'm1117'	'Galactosylceramide'					'3174'	'FAD+`cis`,`cis`-palmito-7,10-dienoyl-CoA=FADH(,2)+`trans`,`cis`,`cis`-2,7,10-hexadecatrienoyl-CoA'
'm1118'	'Galactosylceramide'					'3175'	'FAD+`cis`,`cis`-myristo-5,8-dienoyl-CoA=FADH(,2)+`trans`-2-`cis`,`cis`-5,8-tetradecatrienoyl-CoA'
'm1119'	'Galactosylceramide'					'3176'	'FAD+`cis`,`cis`-myristo-5,8-dienoyl-CoA=FADH(,2)+`trans`-2-`cis`,`cis`-5,8-tetradecatrienoyl-CoA'
'm1120'	'neuromedin N (1-4)'					'3177'	'FAD+`cis`-deca-4-enoyl-CoA=FADH(,2)+`trans`,`cis`-deca-2,4-dienoyl-CoA'
'm1121'	'Glutaconyl-1-CoA'					'3178'	'FAD+`cis`-deca-4-enoyl-CoA=FADH(,2)+`trans`,`cis`-deca-2,4-dienoyl-CoA'
'm1122'	'11''-carboxy-alpha-chromanol'					'3179'	'H(,2)O+`trans`,`cis`-dodeca-2,6-dienoyl-CoA=(3`S`)-3-hydroxydodec-`cis`-6-enoyl-CoA'
'm1123'	'11''-carboxy-alpha-chromanol'					'3181'	'H(,2)O+`trans`-2-`cis`,`cis`-5,8-tetradecatrienoyl-CoA=3(`S`)-hydroxy-5`Z`,8`Z`-tetradecadienoyl-CoA'
'm1124'	'3-Methylcrotonyl-CoA'					'3183'	'H(,2)O+`trans`,`cis`,`cis`-2,7,10-hexadecatrienoyl-CoA=(3`S`)-3-hydroxy-`cis`,`cis`-palmito-7,10-dienoyl-CoA'
'm1125'	'2-Methylbut-2-enoyl-CoA'					'3185'	'H(,2)O+`trans`,`cis`,`cis`-2,9,12-octadecatrienoyl-CoA=(3`S`)-3-hydroxylinoleoyl-CoA'
'm1126'	'2-Methylacetoacetyl-CoA'					'3188'	'NAD(''+)+(3`S`)-3-hydroxy-`cis`,`cis`-palmito-7,10-dienoyl-CoA=NADH+H(''+)+3-oxo-`cis`,`cis`-7,10-hexadecadienoyl-CoA'
'm1127'	'2-Methylacetoacetyl-CoA'					'3189'	'NAD(''+)+(3`S`)-3-hydroxy-`cis`,`cis`-palmito-7,10-dienoyl-CoA=NADH+H(''+)+3-oxo-`cis`,`cis`-7,10-hexadecadienoyl-CoA'
'm1128'	'2-Methylacetoacetyl-CoA'					'3191'	'NAD(''+)+3(`S`)-hydroxy-5`Z`,8`Z`-tetradecadienoyl-CoA=NADH+H(''+)+3-oxo-`cis`,`cis`-5,8-tetradecadienoyl-CoA'
'm1129'	'Glutaryl-CoA'					'3192'	'NAD(''+)+3(`S`)-hydroxy-5`Z`,8`Z`-tetradecadienoyl-CoA=NADH+H(''+)+3-oxo-`cis`,`cis`-5,8-tetradecadienoyl-CoA'
'm1130'	'2-Methylbutanoyl-CoA'					'3194'	'NAD(''+)+(3`S`)-3-hydroxydodec-`cis`-6-enoyl-CoA=3-oxolaur-6-`cis`-enoyl-CoA+NADH+H(''+)'
'm1131'	'2-Methylbutanoyl-CoA'					'3195'	'NAD(''+)+(3`S`)-3-hydroxydodec-`cis`-6-enoyl-CoA=3-oxolaur-6-`cis`-enoyl-CoA+NADH+H(''+)'
'm1132'	'3-Methylbutanoyl-CoA'					'3196'	'dGTP+2''-deoxyuridine=dGDP+dUMP+H(''+) (reversible)'
'm1133'	'(2S,3S)-3-Hydroxy-2-methylbutanoyl-CoA'					'3197'	'dGTP+2''-deoxyuridine=dGDP+dUMP+H(''+)'
'm1134'	'(2S,3S)-3-Hydroxy-2-methylbutanoyl-CoA'					'3198'	'CoA+3-oxolinoleoyl-CoA=acetyl-CoA+`cis`,`cis`-palmito-7,10-dienoyl-CoA'
'm1135'	'3-Hydroxyisovaleryl-CoA'					'3199'	'CoA+3-oxolinoleoyl-CoA=acetyl-CoA+`cis`,`cis`-palmito-7,10-dienoyl-CoA'
'm1136'	'Taurochenodeoxycholate'					'3200'	'CoA+3-oxo-`cis`,`cis`-7,10-hexadecadienoyl-CoA=acetyl-CoA+`cis`,`cis`-myristo-5,8-dienoyl-CoA'
'm1137'	'Taurochenodeoxycholate'					'3201'	'CoA+3-oxo-`cis`,`cis`-7,10-hexadecadienoyl-CoA=acetyl-CoA+`cis`,`cis`-myristo-5,8-dienoyl-CoA'
'm1138'	'Taurohyocholate'					'3202'	'CoA+3-oxo-`cis`,`cis`-5,8-tetradecadienoyl-CoA=acetyl-CoA+`cis`,`cis`-3,6-dodecadienoyl-CoA'
'm1139'	'Dolichyl beta-D-glucosyl phosphate'					'3203'	'CoA+3-oxo-`cis`,`cis`-5,8-tetradecadienoyl-CoA=acetyl-CoA+`cis`,`cis`-3,6-dodecadienoyl-CoA'
'm1140'	'Dolichyl phosphate D-mannose'					'3204'	'CoA+3-oxolaur-6-`cis`-enoyl-CoA=acetyl-CoA+`cis`-deca-4-enoyl-CoA'
'm1141'	'Dolichyl phosphate D-mannose'					'3205'	'CoA+3-oxolaur-6-`cis`-enoyl-CoA=acetyl-CoA+`cis`-deca-4-enoyl-CoA'
'm1142'	'Glucosyl-Ceramides'					'3209'	'H(,2)O+O(,2)+`N`(''1)-acetylspermidine=H(,2)O(,2)+putrescine+acetamidopropanal'
'm1143'	'FAD'					'3211'	'H(,2)O+O(,2)+`N`(''1),`N`(''12)-diacetylspermine=H(,2)O(,2)+`N`(''1)-acetylspermidine+acetamidopropanal'
'm1144'	'FAD'					'3216'	'`cis`,`cis`-3,6-dodecadienoyl-CoA=`trans`,`cis`-dodeca-2,6-dienoyl-CoA'
'm1145'	'FAD'					'3217'	'`cis`,`cis`-3,6-dodecadienoyl-CoA=`trans`,`cis`-dodeca-2,6-dienoyl-CoA'
'm1146'	'FAD'					'3220'	'CDP+reduced glutaredoxin=dCDP+H(,2)O+glutaredoxin'
'm1147'	'FADH2'					'3223'	'CDP+reduced glutaredoxin=dCDP+H(,2)O+glutaredoxin'
'm1148'	'FADH2'					'3225'	'NADPH+O(,2)+H(''+)+estrone=H(,2)O+NADP(''+)+4-hydroxyestrone'
'm1149'	'FADH2'					'3227'	'NADPH+O(,2)+H(''+)+estrone=H(,2)O+NADP(''+)+4-hydroxyestrone'
'm1150'	'2-methylglutaconyl-CoA'					'3228'	'NADPH+O(,2)+H(''+)+estrone=2-hydroxyestrone+H(,2)O+NADP(''+)'
'm1151'	'4-methyl-trans-2-pentenoyl-CoA'					'3230'	'NADPH+O(,2)+H(''+)+estrone=2-hydroxyestrone+H(,2)O+NADP(''+)'
'm1152'	'3-oxo-4-methyl-pentanoyl-CoA'					'3238'	'17b-estradiol+NADPH+O(,2)+H(''+)=H(,2)O+NADP(''+)+4-hydroxy-17b-estradiol'
'm1153'	'25-hydroxyvitamin D3-26,23-lactone'					'3245'	'cyanide+H(''+)+thiosulfate=thiocyanate+sulfite'
'm1154'	'3-beta-D-Glucuronosyl-3-beta-D-galactosyl-4-beta-D-galactosyl-O- beta-D-xylosylprotein'					'3246'	'H(,2)O(,2)+4-hydroxyestrone=2 H(,2)O+estrone-3,4-semiquinone'
'm1155'	'4-methyl-pentanoyl-CoA'					'3247'	'H(,2)O(,2)+4-hydroxyestrone=2 H(,2)O+estrone-3,4-semiquinone (reversible)'
'm1156'	'3(S)-hydroxy-4-methyl-pentanoyl-CoA'					'3248'	'2-hydroxyestrone+H(,2)O(,2)=2 H(,2)O+estrone-2,3-semiquinone'
'm1157'	'3-Methylglutaconyl-CoA'					'3249'	'2-hydroxyestrone+H(,2)O(,2)=2 H(,2)O+estrone-2,3-semiquinone (reversible)'
'm1158'	'5-Carboxy-2-pentenoyl-CoA'					'3250'	'2-hydroxy-17b-estradiol+H(,2)O(,2)=2 H(,2)O+17b-estradiol-2,3-semiquinone'
'm1159'	'cholesta-5,7,24-trien-3beta-ol'					'3251'	'2-hydroxy-17b-estradiol+H(,2)O(,2)=2 H(,2)O+17b-estradiol-2,3-semiquinone'
'm1160'	'cholesta-5,7,24-trien-3beta-ol'					'3252'	'H(,2)O(,2)+4-hydroxy-17b-estradiol=2 H(,2)O+17b-estradiol-3,4-semiquinone'
'm1161'	'5_AND_alpha;-cholesta-8,24-dien-3-one'					'3253'	'H(,2)O(,2)+4-hydroxy-17b-estradiol=2 H(,2)O+17b-estradiol-3,4-semiquinone'
'm1162'	'25-hydroxyvitamin D3-26,23-lactol'					'3255'	'O(,2)+estrone-3,4-semiquinone=superoxide radical+estrone-3,4-quinone'
'm1163'	'24-oxo-1alpha,25-dihydroxyvitamin D3'					'3257'	'O(,2)+17b-estradiol-3,4-semiquinone=superoxide radical+17b-estradiol-3,4-quinone'
'm1164'	'24-oxo-1alpha,23,25-trihydroxyvitamin D3'					'3260'	'tetrahydrobiopterin-4a-carbinolamine=H(,2)O+`O`2''-4a-cyclic-tetrahydrobiopterin'
'm1165'	'trans-Hex-2-enoyl-CoA'					'3263'	'5-cholestene-3b,7a-diol+NAD(''+)=NADH+H(''+)+7a-hydroxy-4-cholesten-3-one'
'm1166'	'3-Oxohexanoyl-CoA'					'3264'	'5-cholestene-3b,7a-diol+NAD(''+)=NADH+H(''+)+7a-hydroxy-4-cholesten-3-one'
'm1167'	'(S)-3-Hydroxy-3-methylglutaryl-CoA'					'3265'	'5-cholestene-3b,7a-diol+NAD(''+)=NADH+H(''+)+7a-hydroxy-4-cholesten-3-one'
'm1168'	'(S)-3-Hydroxy-3-methylglutaryl-CoA'					'3267'	'NADPH+O(,2)+H(''+)+7a-hydroxy-4-cholesten-3-one=H(,2)O+NADP(''+)+7a,12a-dihydroxy-4-cholesten-3-one'
'm1169'	'(3S)-3-Hydroxyadipyl-CoA'					'3269'	'NADPH+O(,2)+H(''+)+27-hydroxycholesterol=H(,2)O+NADP(''+)+7a,27-dihydroxycholesterol'
'm1170'	'Cholesta-5,7-dien-3beta-ol'					'3272'	'5b-cholestane-3a,7a,12a-triol+NADPH+O(,2)+H(''+)=5b-cholestane-3a,7a,12a,27-tetraol+H(,2)O+NADP(''+)'
'm1171'	'Cholesta-5,7-dien-3beta-ol'					'3275'	'5b-cholestane-3a,7a,12a-triol+NADPH+O(,2)+H(''+)=H(,2)O+NADP(''+)+5b-cholestane-3a,7a,12a,25-tetrol'
'm1172'	'Cholesta-5,7-dien-3beta-ol'					'3278'	'NADPH+O(,2)+H(''+)+5b-cholestane-3a,7a,12a,25-tetrol=H(,2)O+NADP(''+)+5b-cholestane-3a,7a,12a,24`S`,25-pentol'
'm1173'	'Desmosterol'					'3280'	'NADPH+O(,2)+H(''+)+5b-cholestane-3a,7a,12a,25-tetrol=H(,2)O+NADP(''+)+5b-cholestane-3a,7a,12a,23,25-pentol'
'm1174'	'Desmosterol'					'3283'	'NADPH+O(,2)+H(''+)+5b-cholestane-3a,7a,12a,25-tetrol=H(,2)O+NADP(''+)+5b-cholestane-3a,7a,12a,24`R`,25-pentol'
'm1175'	'Zymosterol'					'3285'	'NADPH+O(,2)+H(''+)+5b-cholestane-3a,7a,12a,25-tetrol=H(,2)O+NADP(''+)+5b-cholestane-3a,7a,12a,25,27-pentol'
'm1176'	'Vitamin D3'					'3286'	'O(,2)+3a,7a,12a-trihydroxy-5b-cholestanoyl-CoA=H(,2)O(,2)+24-`trans`-trihydroxycoprostenoyl-CoA'
'm1177'	'Vitamin D3'					'3292'	'glutathione+17b-estradiol-3,4-quinone=4-hydroxy-17b-estradiol-2-`S`-glutathione'
'm1178'	'Vitamin D3'					'3294'	'glutathione+17b-estradiol-3,4-quinone=4-hydroxy-17b-estradiol-2-`S`-glutathione'
'm1179'	'5_AND_alpha;-cholesta-8-en-3-one'					'3296'	'glutathione+estrone-3,4-quinone=4-hydroxyestrone-2-S-glutathione'
'm1180'	'Calcidiol'					'3298'	'glutathione+estrone-3,4-quinone=4-hydroxyestrone-2-S-glutathione'
'm1181'	'Calcidiol'					'3299'	'glutathione+12-oxo-leukotriene B(,4)=12-oxo-c-LTB(,3)'
'm1182'	'Calcidiol'					'3300'	'glutathione+12-oxo-leukotriene B(,4)=12-oxo-c-LTB(,3)'
'm1183'	'7alpha-Hydroxycholest-4-en-3-one'					'3301'	'glutathione+12-oxo-leukotriene B(,4)=12-oxo-c-LTB(,3) (reversible)'
'm1184'	'7alpha-Hydroxycholest-4-en-3-one'					'3302'	'glutathione+12-oxo-leukotriene B(,4)=12-oxo-c-LTB(,3)'
'm1185'	'7alpha-Hydroxycholest-4-en-3-one'					'3303'	'NADPH+H(''+)+12-oxo-c-LTB(,3)=NADP(''+)+10,11-dihydro-12`R`-hydroxy-leukotriene C(,4)'
'm1186'	'Calcitriol'					'3305'	'NADPH+H(''+)+12-oxo-c-LTB(,3)=NADP(''+)+10,11-dihydro-12`R`-hydroxy-leukotriene C(,4) (reversible)'
'm1187'	'Calcitriol'					'3319'	'FAD+3a,7a,12a,24-tetrahydroxy-5b-cholestanoyl-CoA=FADH(,2)+3a,7a,12a-trihydroxy-24-oxo-5b-cholestanoyl-CoA (reversible)'
'm1188'	'7alpha,12alpha-Dihydroxycholest-4-en-3-one'					'3322'	'H(,2)O+choloyl-CoA=3a,7a,12a-trihydroxy-5b-cholanoic acid+CoA+H(''+)'
'm1189'	'7alpha,12alpha-Dihydroxycholest-4-en-3-one'					'3323'	'H(,2)O+chenodeoxycholoyl-CoA=CoA+H(''+)+3a,7a-dihydroxy-5b-cholanoic acid'
'm1190'	'24,25-Dihydroxyvitamin D3'					'3324'	'H(,2)O+chenodeoxycholoyl-CoA=CoA+H(''+)+3a,7a-dihydroxy-5b-cholanoic acid (reversible)'
'm1191'	'23S,25-dihydroxyvitamin D3'					'3325'	'H(,2)O+chenodeoxycholoyl-CoA=CoA+H(''+)+3a,7a-dihydroxy-5b-cholanoic acid'
'm1192'	'7_AND_alpha;,12_AND_alpha;-dihydroxycholest-4-en-3-one'					'3326'	'CoA+O(,2)+3a,7a-dihydroxy-5b-cholestanoyl-CoA=H(,2)O+propionyl-CoA+chenodeoxycholoyl-CoA'
'm1193'	'23S,25,26-trihydroxyvitamin D3'					'3327'	'CoA+O(,2)+3a,7a-dihydroxy-5b-cholestanoyl-CoA=H(,2)O+propionyl-CoA+chenodeoxycholoyl-CoA'
'm1194'	'1alpha,24R,25-trihydroxyvitamin D3'					'3328'	'CoA+O(,2)+3a,7a-dihydroxy-5b-cholestanoyl-CoA=H(,2)O+propionyl-CoA+chenodeoxycholoyl-CoA'
'm1195'	'calcitetrol'					'3336'	'2'',3''-cyclic UMP+H(,2)O=H(''+)+3''-UMP'
'm1196'	'Hexanoyl-CoA'					'3353'	'L-cysteine+Dopaquinone=5-S-cysteinyldopa'
'm1197'	'(S)-Hydroxyhexanoyl-CoA'					'3355'	'glutathione+Dopaquinone=5-S-glutathionyl-L-DOPA'
'm1198'	'Cholesterol'					'3356'	'Dopaquinone+5-S-cysteinyldopa=L-dopa+5-(S-L-cysteinyl)-dopaquinone'
'm1199'	'Cholesterol'					'3385'	'H(,2)O+5(`S`),6(`S`)-epoxy-15(`R`)-hydroxyeicosatetraenoate=15-epi-lipoxin A(,4)'
'm1200'	'Cholesterol'					'3387'	'NAD(''+)+lipoxin A(,4)=NADH+H(''+)+15-oxo-lipoxin A(,4)'
'm1201'	'Cholesterol'					'3388'	'NADPH+H(''+)+15-oxo-lipoxin A(,4)=NADP(''+)+13,14-dihydro-15-oxo-lipoxin A(,4)'
'm1202'	'Cholesterol'					'3389'	'NADPH+H(''+)+13,14-dihydro-15-oxo-lipoxin A(,4)=NADP(''+)+13,14-dihydro- lipoxin A(,4)'
'm1203'	'Cholesterol'					'3391'	'H(,2)O+5(`S`),6(`S`)-epoxy-15(`R`)-hydroxyeicosatetraenoate=15-`epi`-lipoxin B(,4)'
'm1204'	'5alpha-Cholest-8-en-3beta-ol'					'3396'	'H(,2)O+anandamide=arachidonate+ethanolamine'
'm1205'	'7alpha-Hydroxycholesterol'					'3397'	'2 O(,2)+reduced acceptor+anandamide=acceptor+H(,2)O+Prostaglandin E(,2) ethanolamide'
'm1206'	'7alpha-Hydroxycholesterol'					'3398'	'2 O(,2)+reduced acceptor+anandamide=acceptor+H(,2)O+Prostaglandin E(,2) ethanolamide'
'm1207'	'7alpha-Hydroxycholesterol'					'3399'	'5-(S-L-cysteinyl)-dopaquinone=H(,2)O+H(''+)+1,4-benzothiazine-`o`-quinonimine'
'm1208'	'7alpha-Hydroxy-5beta-cholestan-3-one'					'3400'	'5-S-cysteinyldopa+1,4-benzothiazine-`o`-quinonimine=5-(S-L-cysteinyl)-dopaquinone+3,4-dihydro-1,4-benzothiazine-3-carboxylate'
'm1209'	'20alpha-Hydroxycholesterol'					'3403'	'acetyl-CoA+L-methionine=CoA+H(''+)+`N`-acetyl-L-methionine'
'm1210'	'20alpha-Hydroxycholesterol'					'3404'	'acetyl-CoA+L-alanine=CoA+H(''+)+`N`-acetyl-L-alanine'
'm1211'	'20alpha-Hydroxycholesterol'					'3405'	'acetyl-CoA+L-asparagine=CoA+H(''+)+`N`-acetyl-L-asparagine'
'm1212'	'22beta-Hydroxycholesterol'					'3410'	'O(,2)+15(`R`)-Hydroxy-(5`Z`,8`Z`,11`Z`,13`E`)-eicosatetraenoate=H(,2)O+5(`S`),6(`S`)-epoxy-15(`R`)-hydroxyeicosatetraenoate'
'm1213'	'22beta-Hydroxycholesterol'					'3413'	'O(,2)+2-arachidonoylglycerol=12-hydroperoxyeicosatetraenoate glyceryl ester'
'm1214'	'27-Hydroxycholesterol'					'3414'	'H(,2)O+1-lyso-2-arachidonoyl-phosphatidate=Pi+2-arachidonoylglycerol (reversible)'
'm1215'	'3alpha,7alpha-Dihydroxy-5beta-cholestan-26-al'					'3415'	'H(,2)O+1-lyso-2-arachidonoyl-phosphatidate=Pi+2-arachidonoylglycerol (reversible)'
'm1216'	'3alpha,7alpha-Dihydroxy-5beta-cholestan-26-al'					'3416'	'H(,2)O+1-lyso-2-arachidonoyl-phosphatidate=Pi+2-arachidonoylglycerol (reversible)'
'm1217'	'3alpha,7alpha-Dihydroxy-5beta-cholestan-26-al'					'3418'	'O(,2)+reduced acceptor+anandamide=acceptor+H(,2)O+12(`S`)-hydroxyarachidonylethanolamide'
'm1218'	'7alpha,12alpha-Dihydroxy-5beta-cholestan-3-one'					'3419'	'O(,2)+reduced acceptor+anandamide=acceptor+H(,2)O+15(`S`)-hydroxyarachidonylethanolamide'
'm1219'	'17alpha,20alpha-Dihydroxycholesterol'					'3423'	'tryptamine+formaldehyde=propionaldehyde+1,2,3,4-tetrahydroisoquinoline'
'm1220'	'17alpha,20alpha-Dihydroxycholesterol'					'3424'	'NAD(''+)+Prostaglandin E(,2) ethanolamide=NADH+H(''+)+15-oxo-Prostaglandin E(,2) ethanolamide'
'm1221'	'17alpha,20alpha-Dihydroxycholesterol'					'3429'	'prostaglandin E(,2)=H(,2)O+prostaglandin A(,2)'
'm1222'	'20alpha,22beta-Dihydroxycholesterol'					'3433'	'3-methylcrotonyl-Coa+glycine=CoA+H(''+)+3-methylcrotonoylglycine'
'm1223'	'7alpha,27-Dihydroxycholesterol'					'3434'	'3a,7a,12a-trihydroxy-5b-cholanoic acid+H(,2)O+NADP(''+)=NADPH+O(,2)+H(''+)+3a,12a-dihydroxy-5b-cholanoic acid'
'm1224'	'20_AND_alpha;-22_AND_beta;-dihydroxy-cholesterol'					'3435'	'3a,7a,12a-trihydroxy-5b-cholanoic acid+H(,2)O+NADP(''+)=NADPH+O(,2)+H(''+)+3a,12a-dihydroxy-5b-cholanoic acid'
'm1225'	'3alpha,7alpha-Dihydroxy-5beta-cholestanate'					'3436'	'arachidonoyl-CoA+glycine=CoA+H(''+)+N-arachidonoylglycine'
'm1226'	'3alpha,7alpha-Dihydroxy-5beta-cholestanate'					'3466'	'acetyl-CoA+L-cystathionine=CoA+H(''+)+`N`-acetyl-L-cystathionine'
'm1227'	'3alpha,7alpha-Dihydroxy-5beta-cholestanate'					'3473'	'acetyl-CoA+L-cysteine=CoA+H(''+)+`N`-acetyl-L-cysteine'
'm1228'	'3alpha,7alpha,12alpha-trihydroxy-5beta-cholestan-27-al'					'3474'	'NADPH+O(,2)+H(''+)+estrone=H(,2)O+NADP(''+)+16a-hydroxyestrone'
'm1229'	'3alpha,7alpha,12alpha-trihydroxy-5beta-cholestan-27-al'					'3475'	'NADPH+O(,2)+H(''+)+estrone=H(,2)O+NADP(''+)+16a-hydroxyestrone'
'm1230'	'3alpha,7alpha,12alpha-trihydroxy-5beta-cholestan-27-al'					'3477'	'NADPH+O(,2)+H(''+)+25-hydroxyvitamin D(,3)=H(,2)O+NADP(''+)+24,25-Dihydroxyvitamin D(,3)'
'm1231'	'Cholesterol sulfate'					'3483'	'12-hydroperoxyeicosatetraenoate+2 glutathione=12-hydroxyeicosatetraenoate+H(,2)O+Oxidized glutathione'
'm1232'	'Cholesterol sulfate'					'3491'	'H(,2)O+kinetensin=L-leucine+kinetensin 1-8'
'm1233'	'cholesterol sulfate'					'3495'	'H(,2)O+neuromedin N=L-leucine+neuromedin N (1-4)'
'm1234'	'cholesterol sulfate'					'3499'	'glutathione+dopamine `o`-quinone=5-S-glutathionyl-dopamine'
'm1235'	'3alpha,7alpha,12alpha-Trihydroxy-5beta-cholestanoate'					'3523'	'a-ketoglutarate+L-3-hydroxykynurenine=L-glutamate+H(,2)O+H(''+)+xanthurenate'
'm1236'	'3alpha,7alpha,12alpha-Trihydroxy-5beta-cholestanoate'					'3524'	'a-ketoglutarate+L-3-hydroxykynurenine=L-glutamate+H(,2)O+H(''+)+xanthurenate'
'm1237'	'3alpha,7alpha,12alpha-Trihydroxy-5beta-cholestanoate'					'3533'	'2 NADPH+2 O(,2)+H(''+)+13''-hydroxy-a-tocopherol=3 H(,2)O+2 NADP(''+)+13''-carboxy-a-tocopherol'
'm1238'	'3alpha,7alpha,12alpha,25-tetrahydroxy-5beta-cholestane-24-one'					'3534'	'2 NADPH+2 O(,2)+H(''+)+13''-hydroxy-a-tocopherol=3 H(,2)O+2 NADP(''+)+13''-carboxy-a-tocopherol'
'm1239'	'3alpha,7alpha-Dihydroxy-5beta-cholestane'					'3537'	'NADPH+O(,2)+H(''+)+`RRR`-a-tocopherol=H(,2)O+NADP(''+)+13''-hydroxy-a-tocopherol'
'm1240'	'3alpha,7alpha,26-Trihydroxy-5beta-cholestane'					'3538'	'NADPH+O(,2)+H(''+)+`RRR`-a-tocopherol=H(,2)O+NADP(''+)+13''-hydroxy-a-tocopherol'
'm1241'	'3alpha,7alpha,12alpha-Trihydroxy-5beta-cholestane'					'3543'	'ATP+CoA+2 H(,2)O+NAD(''+)+O(,2)+9''-carboxy-a-chromanol=AMP+H(,2)O(,2)+NADH+PP(,i)+propionyl-CoA+2 H(''+)+7''-carboxy-a-chromanol'
'm1242'	'3alpha,7alpha,12alpha-Trihydroxy-5beta-cholestane'					'3544'	'ATP+CoA+2 H(,2)O+NAD(''+)+O(,2)+9''-carboxy-a-chromanol=AMP+H(,2)O(,2)+NADH+PP(,i)+propionyl-CoA+2 H(''+)+7''-carboxy-a-chromanol'
'm1243'	'3alpha,7alpha,12alpha,26-Tetrahydroxy-5beta-cholestane'					'3545'	'ATP+CoA+2 H(,2)O+NAD(''+)+O(,2)+5''-carboxy-a-chromanol=AMP+H(,2)O(,2)+NADH+PP(,i)+propionyl-CoA+2 H(''+)+3''-carboxy-a-chromanol'
'm1244'	'5beta-cholestane-3alpha,7alpha,12alpha,27-tetraol'					'3546'	'ATP+CoA+2 H(,2)O+NAD(''+)+O(,2)+5''-carboxy-a-chromanol=AMP+H(,2)O(,2)+NADH+PP(,i)+propionyl-CoA+2 H(''+)+3''-carboxy-a-chromanol'
'm1245'	'5beta-cholestane-3alpha,7alpha,12alpha,25-tetrol'					'3555'	'NADPH+H(''+)+cholesta-5,7,24-trien-3b-ol=desmosterol+NADP(''+) (reversible)'
'm1246'	'5beta-cholestane-3alpha,7alpha,12alpha,24S,25-pentol'					'3556'	'NADPH+H(''+)+cholesta-5,7,24-trien-3b-ol=desmosterol+NADP(''+) (reversible)'
'm1247'	'5beta-cholestane-3alpha,7alpha,12alpha,23,25-pentol'					'3559'	'3-methylbutanoyl-CoA+glycine=CoA+H(''+)+isovalerylglycine'
'm1248'	'5beta-cholestane-3alpha,7alpha,12alpha,25,27-pentol'					'3560'	'2`S`-methylbutyryl-CoA+glycine=CoA+H(''+)+2-methylbutyrylglycine'
'm1249'	'5beta-cholestane-3alpha,7alpha,12alpha,24R,25-pentol'					'3561'	'glycine+isobutyryl-CoA=CoA+H(''+)+isobutyrylglycine'
'm1250'	'4-hydroxyestrone-2-S-glutathione'					'3570'	'H(,2)O+`N`-acetyl-seryl-aspartyl-lysyl-proline=`N`-acetyl-seryl-aspartate+lysyl-proline'
'm1251'	'4-hydroxyestrone-2-S-glutathione'					'3573'	'ATP+2-methylcrotonyl-CoA+HCO(,3)=ADP+Pi+H(''+)+2-methylglutaconyl-CoA'
'm1252'	'4-hydroxy-17beta-estradiol-2-S-glutathione'					'3585'	'Cl(''-)+H(,2)O(,2)=H(,2)O+hypochlorite'
'm1253'	'4-hydroxy-17beta-estradiol-2-S-glutathione'					'3596'	'glutathione+adrenochrome=5-`S`-glutathionyl-adrenochrome hydroquinone'
'm1254'	'4_AND_alpha;-carboxy-5_AND_alpha;-cholesta-8,24-dien-3_AND_beta;-ol'					'3602'	'glutathione+dopaminochrome=5-`S`-glutathionyl-aminochrome reduced'
'm1255'	'3-Keto-4-methylzymosterol'					'3605'	'phosphoadenosinephosphosulfate+dopamine=adenosine 3'',5''-bisphosphate+H(''+)+dopamine sulfate'
'm1256'	'4_AND_alpha;-formyl-5_AND_alpha;-cholesta-8,24-dien-3_AND_beta;-ol'					'3606'	'H(,2)O+g-CEHC-glucuronide=D-glucuronate+H(''+)+g-carboxyethyl-hydroxychroman'
'm1257'	'Cholesterol ester'					'3607'	'H(,2)O+g-CEHC-glucuronide=D-glucuronate+H(''+)+g-carboxyethyl-hydroxychroman'
'm1258'	'Cholesterol ester'					'3612'	'H(,2)O+2-arachidonoylglycerol=arachidonate+glycerol+H(''+)'
'm1259'	'4_AND_alpha;-carboxy-5_AND_alpha;-cholesta-8-en-3_AND_beta;-ol'					'3620'	'H(''+)+urate+3 hydroxyl radical=allantoate+CO(,2)'
'm1260'	'4alpha-Methyl-5alpha-cholest-7-en-3-one'					'3621'	'L-ascorbate+urate radical=urate+monodehydroascorbate (reversible)'
'm1261'	'4alpha-Methylzymosterol'					'3625'	'2 glutathione+3,3'',5'' - triiodothyronine=H(''+)+iodide+Oxidized glutathione+3,3''-diiodo-L-thyronine (reversible)'
'm1262'	'4_AND_alpha;-hydroxymethyl-5_AND_alpha;-cholesta-8,24-dien-3_AND_beta;-ol'					'3632'	'5b-cholestane-3a,7a,12a,27-tetraol+NAD(''+)=NADH+H(''+)+3a,7a,12a-trihydroxy-5b-cholestan-27-al'
'm1263'	'4_AND_alpha;-formyl-5_AND_alpha;-cholesta-8-en-3_AND_beta;-ol'					'3639'	'NADP(''+)+5b-cholestane-3a,7a,12a,24`S`,25-pentol=NADPH+H(''+)+3a,7a,12a,25-tetrahydroxy-5b-cholestane-24-one'
'm1264'	'4alpha-Methylcholesta-8-en-3beta-ol'					'3650'	'H(,2)O+`N`-acetyl-L-asparagine=acetate+L-asparagine (reversible)'
'm1265'	'Methostenol'					'3654'	'H(,2)O+propionyl-CoA=CoA+propionate+H(''+)'
'm1266'	'4_AND_alpha;-hydroxymethyl-5_AND_alpha;-cholesta-8-en-3_AND_beta;-ol'					'3655'	'O(,2)+L-phenylalanine+tetrahydrobiopterin=L-tyrosine+tetrahydrobiopterin-4a-carbinolamine'
'm1267'	'N-Acetyl-D-glucosaminyldiphosphodolichol'					'3662'	'retinol=13-`cis`-retinol (reversible)'
'm1268'	'N-Acetyl-D-glucosaminyldiphosphodolichol'					'3668'	'`O`2''-4a-cyclic-tetrahydrobiopterin=quinonoid dihydrobiopterin'
'm1269'	'13''-carboxy-alpha-tocotrienol'					'3669'	'UDP-galactose+galactosylceramide=H(''+)+UDP+Digalactosylceramide'
'm1270'	'alpha-Tocotrienol'					'3670'	'UDP-galactose+galactosylceramide=H(''+)+UDP+Digalactosylceramide'
'm1271'	'alpha-Tocotrienol'					'3678'	'O(,2)+H(''+)+dihydroceramide+NAD(P)H=ceramide d18:1(4c)+2 H(,2)O+NAD(P)(''+)'
'm1272'	'alpha-Tocotrienol'					'3680'	'UDP-galactose+ceramide=H(''+)+UDP+galactosylceramide'
'm1273'	'13''-hydroxy-alpha-tocotrienol'					'3682'	'UDP-galactose+ceramide=H(''+)+UDP+galactosylceramide'
'm1274'	'4,4-Dimethyl-5alpha-cholesta-8,14,24-trien-3beta-ol'					'3686'	'CMP-`N`-acetylneuraminate+galactosylceramide=CMP+H(''+)+ganglioside GM4'
'm1275'	'4_AND_alpha;-formyl-4_AND_beta;-methyl-5_AND_alpha;-cholesta-8,24-dien-3_AND_beta;-ol'					'3688'	'UDP-galactose+Glucosylceramide=H(''+)+UDP+Lactosylceramide'
'm1276'	'4alpha-Methylzymosterol-4-carboxylate'					'3692'	'ATP+CoA+2 H(,2)O+NAD(''+)+O(,2)+11''-carboxy-a-chromanol=acetyl-CoA+AMP+H(,2)O(,2)+NADH+PP(,i)+2 H(''+)+9''-carboxy-a-chromanol'
'm1277'	'13''-carboxy-alpha-tocopherol'					'3693'	'ATP+CoA+2 H(,2)O+NAD(''+)+O(,2)+11''-carboxy-a-chromanol=acetyl-CoA+AMP+H(,2)O(,2)+NADH+PP(,i)+2 H(''+)+9''-carboxy-a-chromanol'
'm1278'	'13''-carboxy-alpha-tocopherol'					'3697'	'H(,2)O+galactosylsphingosine=D-galactose+D-sphingosine (reversible)'
'm1279'	'trans-Oct-2-enoyl-CoA'					'3698'	'phosphoadenosinephosphosulfate+galactosylsphingosine=adenosine 3'',5''-bisphosphate+H(''+)+galactosylsphingosine sulfate'
'm1280'	'3-Oxooctanoyl-CoA'					'3699'	'phosphoadenosinephosphosulfate+galactosylsphingosine=adenosine 3'',5''-bisphosphate+H(''+)+galactosylsphingosine sulfate'
'm1281'	'14-Demethyllanosterol'					'3703'	'phosphoadenosinephosphosulfate+Lactosylceramide=adenosine 3'',5''-bisphosphate+H(''+)+lactosylceramide sulfate'
'm1282'	'14-Demethyllanosterol'					'3704'	'phosphoadenosinephosphosulfate+Lactosylceramide=adenosine 3'',5''-bisphosphate+H(''+)+lactosylceramide sulfate'
'm1283'	'4_AND_alpha;-hydroxymethyl-4_AND_beta;-methyl-5_AND_alpha;-cholesta-8,24-dien-3_AND_beta;-ol'					'3709'	'UDP-galactose+Lactosylceramide=H(''+)+UDP+IsoGlobotriasyl ceramide'
'm1284'	'3beta-Hydroxy-4beta-methyl-5alpha-cholest-7-ene-4alpha-carboxylate'					'3717'	'(2`S`)-pristanoyl-CoA=(2`R`)-pristanoyl-CoA (reversible)'
'm1285'	'Octanoyl-CoA'					'3725'	'NADP(''+)+testosterone=D(''4)-androstenedione+NADPH+H(''+)'
'm1286'	'Octanoyl-CoA'					'3736'	'H(,2)O+D-pantetheine=cysteamine+(`R`)-pantothenate (reversible)'
'm1287'	'(S)-Hydroxyoctanoyl-CoA'					'3746'	'NADH+O(,2)+3 H(''+)+plasmanylethanolamine=2 H(,2)O+NAD(''+)+1-`O`-1''-alkenyl-2-acyl-phosphatidylethanolamine (reversible)'
'm1288'	'alpha-Tocopherol'					'3747'	'H(,2)O+1-`O`-1''-alkenyl-2-acyl-phosphatidylethanolamine=H(''+)+1-`O`-alk-1''-enyl-2-lyso-phosphatidylethanolamine+carboxylate'
'm1289'	'alpha-Tocopherol'					'3748'	'H(,2)O+1-`O`-1''-alkenyl-2-acyl-phosphatidylethanolamine=H(''+)+1-`O`-alk-1''-enyl-2-lyso-phosphatidylethanolamine+carboxylate'
'm1290'	'alpha-Tocopherol'					'3749'	'H(,2)O+1-`O`-1''-alkenyl-2-acyl-phosphatidylethanolamine=H(''+)+1-`O`-alk-1''-enyl-2-lyso-phosphatidylethanolamine+carboxylate'
'm1291'	'13''-hydroxy-alpha-tocopherol'					'3756'	'ethanolamine+H(''+)+alk-1-enyl-2-lyso-glycerophosphate=H(,2)O+1-`O`-alk-1''-enyl-2-lyso-phosphatidylethanolamine (reversible)'
'm1292'	'13''-hydroxy-alpha-tocopherol'					'3758'	'CoA+plasmenate=acyl-CoA+alk-1-enyl-2-lyso-glycerophosphate'
'm1293'	'13''-hydroxy-_AND_alpha;-tocopherol'					'3759'	'CoA+plasmenate=acyl-CoA+alk-1-enyl-2-lyso-glycerophosphate'
'm1294'	'mannosealpha1-6(ethanolaminephosphate-2)mannosealpha1-4(acyl)glucosaminylphosphatidylinositol'					'3760'	'CoA+plasmenate=acyl-CoA+alk-1-enyl-2-lyso-glycerophosphate'
'm1295'	'1,1-Dichloroethylene epoxide'					'3763'	'2 L-cysteine+O(,2)=L-cystine+H(,2)O(,2)'
'm1296'	'Glyoxylate'					'3768'	'NAD(''+)+27-hydroxycholesterol=NADH+H(''+)+7a-hydroxy-4-cholesten-3-one'
'm1297'	'Glyoxylate'					'3770'	'CDP-diacylglycerol+(`R`)-glycerol 1-monophosphate=CMP+3-(3-`sn`-phosphatidyl)-`sn`-glycerol 1-phosphate+H(''+)'
'm1298'	'2-Bromoacetaldehyde'					'3814'	'NAD(''+)+D-Dihydro-6,8-dithiooctamide=lipoate+NADH+H(''+) (reversible)'
'm1299'	'1,2-Dibromoethane'					'3817'	'H(,2)O(,2)+H(''+)+urate=alloxan+urea'
'm1300'	'L-Amino acid'					'3822'	'hydroxyl radical+monodehydroascorbate=dehydroascorbate+H(,2)O (reversible)'
'm1301'	'Acetaldehyde'					'3827'	'NAD(''+)+(`S`)-3-hydroxypalmitoleoyl-CoA=NADH+3-oxopalmitoleoyl-CoA+H(''+)'
'm1302'	'Acetaldehyde'					'3828'	'NAD(''+)+(`S`)-3-hydroxypalmitoleoyl-CoA=NADH+3-oxopalmitoleoyl-CoA+H(''+)'
'm1303'	'Acetate'					'3830'	'NAD(''+)+`cis`-(3`S`)-hydroxytetradec-7-enoyl-CoA=3-oxomyrist-7-enoyl-CoA+NADH+H(''+)'
'm1304'	'Acetate'					'3831'	'NAD(''+)+`cis`-(3`S`)-hydroxytetradec-7-enoyl-CoA=3-oxomyrist-7-enoyl-CoA+NADH+H(''+)'
'm1305'	'Acetate'					'3833'	'NAD(''+)+3(`S`)-3-hydroxydodecen-(5`Z`)-oyl-CoA=3-oxolaur-`cis`-5-enoyl-CoA+NADH+H(''+)'
'm1306'	'Acetate'					'3834'	'NAD(''+)+3(`S`)-3-hydroxydodecen-(5`Z`)-oyl-CoA=3-oxolaur-`cis`-5-enoyl-CoA+NADH+H(''+)'
'm1307'	'Acetate'					'3835'	'NADPH+H(''+)+1-acyl-glycerone phosphate=NADP(''+)+1-acyl-`sn`-glycerol 3-phosphate'
'm1308'	'Acetate'					'3837'	'ATP+CoA+palmitoleate=AMP+palmitoleoyl-CoA+PP(,i) (reversible)'
'm1309'	'Glycolate'					'3838'	'ATP+CoA+palmitoleate=AMP+palmitoleoyl-CoA+PP(,i) (reversible)'
'm1310'	'Glycine'					'3839'	'FAD+palmitoleoyl-CoA=FADH(,2)+`trans`,`cis`-hexadeca-2,9-dienoyl-CoA'
'm1311'	'Glycine'					'3840'	'FAD+palmitoleoyl-CoA=FADH(,2)+`trans`,`cis`-hexadeca-2,9-dienoyl-CoA'
'm1312'	'Glycine'					'3841'	'FAD+`cis`-myrist-7-enoyl-CoA=FADH(,2)+`trans`,`cis`-myristo-2,7-dienoyl-CoA'
'm1313'	'Ethanol'					'3842'	'FAD+`cis`-myrist-7-enoyl-CoA=FADH(,2)+`trans`,`cis`-myristo-2,7-dienoyl-CoA'
'm1314'	'Ethanolamine'					'3843'	'FADH(,2)+`trans`,`cis`-dodeca-2,5-dienoyl-CoA=FAD+`cis`-laur-5-enoyl-CoA'
'm1315'	'Ethanolamine'					'3844'	'FADH(,2)+`trans`,`cis`-dodeca-2,5-dienoyl-CoA=FAD+`cis`-laur-5-enoyl-CoA'
'm1316'	'Hypotaurine'					'3845'	'CoA+3-oxopalmitoleoyl-CoA=acetyl-CoA+`cis`-myrist-7-enoyl-CoA'
'm1317'	'Cysteamine'					'3846'	'CoA+3-oxopalmitoleoyl-CoA=acetyl-CoA+`cis`-myrist-7-enoyl-CoA'
'm1318'	'Ethanolamine phosphate'					'3847'	'CoA+3-oxomyrist-7-enoyl-CoA=acetyl-CoA+`cis`-laur-5-enoyl-CoA'
'm1319'	'Ethanolamine phosphate'					'3848'	'CoA+3-oxomyrist-7-enoyl-CoA=acetyl-CoA+`cis`-laur-5-enoyl-CoA'
'm1320'	'12-oxo-c-LTB3'					'3851'	'H(,2)O+`trans`,`cis`-hexadeca-2,9-dienoyl-CoA=(`S`)-3-hydroxypalmitoleoyl-CoA'
'm1321'	'12-oxo-c-LTB3'					'3852'	'H(,2)O+`trans`,`cis`-hexadeca-2,9-dienoyl-CoA=(`S`)-3-hydroxypalmitoleoyl-CoA'
'm1322'	'12-oxo-c-LTB3'					'3853'	'H(,2)O+`trans`,`cis`-myristo-2,7-dienoyl-CoA=`cis`-(3`S`)-hydroxytetradec-7-enoyl-CoA'
'm1323'	'12-oxo-c-LTB3'					'3855'	'H(,2)O+`trans`,`cis`-dodeca-2,5-dienoyl-CoA=3(`S`)-3-hydroxydodecen-(5`Z`)-oyl-CoA'
'm1324'	'S-(PGA2)-glutathione'					'3856'	'H(,2)O+`trans`,`cis`-dodeca-2,5-dienoyl-CoA=3(`S`)-3-hydroxydodecen-(5`Z`)-oyl-CoA'
'm1325'	'S-(PGA2)-glutathione'					'3857'	'acyl-CoA+1-alkyl-2-lyso-`sn`-glycero-3-phosphate=CoA+1-alkyl-2-acyl-`sn`-glycero-3-phosphate'
'm1326'	'S-(PGJ2)-glutathione'					'3858'	'NAD(''+)+12`S`-HHT=NADH+H(''+)+12-oxo-(5`Z`,8`Z`,10`E`)-heptadecatrienoic acid'
'm1327'	'S-(9-deoxy-delta9,12-PGD2)-glutathione'					'3859'	'H(,2)O+1-alkyl-2-acyl-`sn`-glycero-3-phosphate=Pi+1-alkyl-2-acyl-`sn`-glycerol'
'm1328'	'S-(9-deoxy-delta9,12-PGD2)-glutathione'					'3862'	'TDP+phospho`enol`pyruvate+H(''+)=TTP+pyruvate'
'm1329'	'S-(9-deoxy-delta9,12-PGD2)-glutathione'					'3867'	'CDP-ethanolamine+1-alkyl-2-acyl-`sn`-glycerol=CMP+H(''+)+alkylacylglycerophosphoethanolamine'
'm1330'	'2,6-dimethyl-trans-2-heptenoyl-CoA'					'3868'	'CDP-ethanolamine+1-alkyl-2-acyl-`sn`-glycerol=CMP+H(''+)+alkylacylglycerophosphoethanolamine'
'm1331'	'3-oxo-(2S)-methylisocapryloyl-CoA'					'3870'	'1,2-diacyl-`sn`-glycerol+H(,2)O=1-monoacylglycerol+H(''+)+carboxylate'
'm1332'	'10,11-dihydro-12R-hydroxy-leukotriene C4'					'3871'	'1,2-diacyl-`sn`-glycerol+H(,2)O=1-monoacylglycerol+H(''+)+carboxylate (reversible)'
'm1333'	'10,11-dihydro-12R-hydroxy-leukotriene C4'					'3872'	'dCDP+phospho`enol`pyruvate+H(''+)=dCTP+pyruvate'
'm1334'	'S-(9-hydroxy-PGA2)-glutathione'					'3874'	'ATP+alkylglycerol=ADP+H(''+)+1-alkyl-2-lyso-`sn`-glycero-3-phosphate (reversible)'
'm1335'	'S-(9-deoxy-delta12-PGD2)-glutathione'					'3875'	'ATP+1-phosphatidyl-`myo`-inositol 5-phosphate=ADP+1-phosphatidyl-D-`myo`-inositol 4,5-bisphosphate+H(''+)'
'm1336'	'S-(9-deoxy-delta12-PGD2)-glutathione'					'3876'	'ATP+1-phosphatidyl-`myo`-inositol 5-phosphate=ADP+1-phosphatidyl-D-`myo`-inositol 4,5-bisphosphate+H(''+)'
'm1337'	'Leukotriene C4'					'3877'	'ATP+1-phosphatidyl-`myo`-inositol 5-phosphate=ADP+1-phosphatidyl-D-`myo`-inositol 4,5-bisphosphate+H(''+) (reversible)'
'm1338'	'2(R),6-dimethyl-heptanoyl-CoA'					'3878'	'ATP+1-phosphatidyl-`myo`-inositol 5-phosphate=ADP+1-phosphatidyl-D-`myo`-inositol 4,5-bisphosphate+H(''+)'
'm1339'	'2(S),6-dimethyl-heptanoyl-CoA'					'3879'	'ATP+1-phosphatidyl-`myo`-inositol 5-phosphate=ADP+H(''+)+1-phosphatidyl-`myo`-inositol 3,5-bisphosphate'
'm1340'	'3(S)-hydroxy-2(S),6-dimethyl-heptanoyl-CoA'					'3880'	'ATP+1-phosphatidyl-`myo`-inositol 5-phosphate=ADP+H(''+)+1-phosphatidyl-`myo`-inositol 3,5-bisphosphate'
'm1341'	'S-(PGA1)-glutathione'					'3881'	'ATP+1-phosphatidyl-`myo`-inositol 5-phosphate=ADP+H(''+)+1-phosphatidyl-`myo`-inositol 3,5-bisphosphate'
'm1342'	'S-(PGA1)-glutathione'					'3882'	'ATP+1-phosphatidyl-`myo`-inositol 5-phosphate=ADP+H(''+)+1-phosphatidyl-`myo`-inositol 3,5-bisphosphate'
'm1343'	'S-(9-hydroxy-PGA1)-glutathione'					'3883'	'ATP+phosphatidyl-`myo`-inositol 3-phosphate=ADP+H(''+)+1-phosphatidyl-`myo`-inositol 3,5-bisphosphate'
'm1344'	'Squalene'					'3884'	'ATP+phosphatidyl-`myo`-inositol 3-phosphate=ADP+H(''+)+1-phosphatidyl-`myo`-inositol 3,5-bisphosphate'
'm1345'	'Squalene'					'3886'	'ATP+phosphatidyl-`myo`-inositol 3-phosphate=ADP+H(''+)+1-phosphatidyl-`myo`-inositol 3,5-bisphosphate'
'm1346'	'(S)-2,3-Epoxysqualene'					'3888'	'NADPH+O(,2)+H(''+)+24-oxo-1a,25-dihydroxyvitamin D(,3)=H(,2)O+NADP(''+)+24-oxo-1a,23,25-trihydroxyvitamin D(,3)'
'm1347'	'(S)-2,3-Epoxysqualene'					'3889'	'NADPH+H(''+)+1-alkyl-glycerone phosphate=NADP(''+)+1-alkyl-2-lyso-`sn`-glycero-3-phosphate'
'm1348'	'Lanosterol'					'3892'	'arachidonoyl-CoA+O(,2)=H(,2)O(,2)+2-`trans`-`cis`,`cis`,`cis`,`cis`-4,8,11,14-eicosapentaenoyl-CoA'
'm1349'	'Lanosterol'					'3893'	'arachidonoyl-CoA+O(,2)=H(,2)O(,2)+2-`trans`-`cis`,`cis`,`cis`,`cis`-4,8,11,14-eicosapentaenoyl-CoA'
'm1350'	'maltopentaose'					'3894'	'H(,2)O+`trans`-2-`cis`,`cis`,`cis`-8,11,14-eicosatetraenoyl-CoA=3(`S`)-hydroxy-dihomo-g-linolenoyl-CoA (reversible)'
'm1351'	'all-trans-Hexaprenyl diphosphate'					'3895'	'NAD(''+)+3(`S`)-hydroxy-dihomo-g-linolenoyl-CoA=NADH+H(''+)+3-oxo-dihomo-g-linolenoyl-CoA'
'm1352'	'Presqualene diphosphate'					'3896'	'CoA+3-oxo-dihomo-g-linolenoyl-CoA=acetyl-CoA+g-linolenoyl-CoA'
'm1353'	'Presqualene diphosphate'					'3897'	'CoA+3-oxo-6`Z`,9`Z`,12`Z`-octadecatrienoyl-CoA=acetyl-CoA+4`Z`,7`Z`,10`Z`-hexadecatrienoyl-CoA'
'm1354'	'trans,cis-deca-2,4-dienoyl-CoA'					'3898'	'H(,2)O+2`E`,6`Z`,9`Z`,12`Z`-octadecatetraenoyl-CoA=3(`S`)-hydroxy-6`Z`,9`Z`,12`Z`-octadecatrienoyl-CoA'
'm1355'	'trans,cis-deca-2,4-dienoyl-CoA'					'3899'	'NAD(''+)+3(`S`)-hydroxy-6`Z`,9`Z`,12`Z`-octadecatrienoyl-CoA=NADH+H(''+)+3-oxo-6`Z`,9`Z`,12`Z`-octadecatrienoyl-CoA'
'm1356'	'trans,cis-deca-2,4-dienoyl-CoA'					'3900'	'3`Z`,7`Z`,10`Z`-hexadecatrienoyl-CoA=`trans`,`cis`,`cis`-2,7,10-hexadecatrienoyl-CoA'
'm1357'	'trans-_AND_Delta;_ST_SUP_LT_2_ST_/SUP_LT_, cis-_AND_Delta;_ST_SUP_LT_4_ST_/SUP_LT_-decadienoyl-CoA'					'3901'	'3`Z`,7`Z`,10`Z`-hexadecatrienoyl-CoA=`trans`,`cis`,`cis`-2,7,10-hexadecatrienoyl-CoA'
'm1358'	'cis-deca-4-enoyl-CoA'					'3903'	'O(,2)+4`Z`,7`Z`,10`Z`-hexadecatrienoyl-CoA=H(,2)O(,2)+2`E`,4`Z`,7`Z`,10`Z`-hexadecatetraenoyl-CoA'
'm1359'	'cis-deca-4-enoyl-CoA'					'3904'	'2-`trans`-`cis`,`cis`,`cis`,`cis`-4,8,11,14-eicosapentaenoyl-CoA=`trans`-3-`cis`-5,8,11,14-eicosapentaenoyl-CoA'
'm1360'	'trans-3-decenoyl-CoA'					'3905'	'2-`trans`-`cis`,`cis`,`cis`,`cis`-4,8,11,14-eicosapentaenoyl-CoA=`trans`-3-`cis`-5,8,11,14-eicosapentaenoyl-CoA'
'm1361'	'trans-3-decenoyl-CoA'					'3907'	'O(,2)+g-linolenoyl-CoA=H(,2)O(,2)+2`E`,6`Z`,9`Z`,12`Z`-octadecatetraenoyl-CoA'
'm1362'	'trans-3-decenoyl-CoA'					'3908'	'`cis`,`cis`-myristo-5,8-dienoyl-CoA+O(,2)=H(,2)O(,2)+`trans`-2-`cis`,`cis`-5,8-tetradecatrienoyl-CoA'
'm1363'	'trans-Dec-2-enoyl-CoA'					'3909'	'`trans`-2-`cis`,`cis`-5,8-tetradecatrienoyl-CoA=(3`E`,5`Z`,8`Z`)-tetradecatrienoyl-CoA'
'm1364'	'trans-Dec-2-enoyl-CoA'					'3910'	'(3`E`,5`Z`,8`Z`)-tetradecatrienoyl-CoA=`trans`-2-`cis`,`cis`-4,8-tetradecatrienoyl-CoA'
'm1365'	'trans-Dec-2-enoyl-CoA'					'3911'	'NADPH+H(''+)+`trans`-2-`cis`,`cis`-4,8-tetradecatrienoyl-CoA=NADP(''+)+`trans`-3-`cis`-8-tetradecadienoyl-CoA'
'm1366'	'3-Oxodecanoyl-CoA'					'3912'	'`trans`-2-`cis`,`cis`,`cis`-8,11,14-eicosatetraenoyl-CoA=`trans`-3-`cis`-8,11,14-eicosatetraenoyl-CoA'
'm1367'	'Decanoyl-CoA'					'3913'	'`trans`-2-`cis`-8-tetradecadienoyl-CoA=`trans`-3-`cis`-8-tetradecadienoyl-CoA'
'm1368'	'(S)-Hydroxydecanoyl-CoA'					'3914'	'H(,2)O+`trans`-2-`cis`-8-tetradecadienoyl-CoA=(3`S`)-3-hydroxy-`cis`-8-tetradecenoyl-CoA'
'm1369'	'beta-D-Galactosyl-1,4-beta-D-glucosylceramide'					'3915'	'NAD(''+)+(3`S`)-3-hydroxy-`cis`-8-tetradecenoyl-CoA=NADH+H(''+)+3-oxo-`cis`-8-tetradecenoyl-CoA'
'm1370'	'beta-D-Galactosyl-1,4-beta-D-glucosylceramide'					'3916'	'CoA+3-oxo-`cis`-8-tetradecenoyl-CoA=acetyl-CoA+`cis`-6-dodecenoyl-CoA'
'm1371'	'beta-D-Galactosyl-1,4-beta-D-glucosylceramide'					'3918'	'phosphoadenosinephosphosulfate+reduced thioredoxin=adenosine 3'',5''-bisphosphate+2 H(''+)+oxidized thioredoxin+sulfite'
'm1372'	'beta-D-Galactosyl-1,4-beta-D-glucosylceramide'					'3919'	'leukotriene B(,4)+NAD(''+)=NADH+H(''+)+12-oxo-leukotriene B(,4)'
'm1373'	'Digalactosylceramide'					'3921'	'leukotriene B(,4)+NAD(''+)=NADH+H(''+)+12-oxo-leukotriene B(,4) (reversible)'
'm1374'	'Digalactosylceramide'					'3925'	'H(,2)O+NAD(''+)+20-oxo-leukotriene B(,4)=NADH+2 H(''+)+20-carboxy-leukotriene-B(,4)'
'm1375'	'Digalactosylceramide'					'3926'	'H(,2)O+NAD(''+)+20-oxo-leukotriene B(,4)=NADH+2 H(''+)+20-carboxy-leukotriene-B(,4)'
'm1376'	'Digalactosylceramide'					'3927'	'H(,2)O+NAD(''+)+20-oxo-leukotriene B(,4)=NADH+2 H(''+)+20-carboxy-leukotriene-B(,4)'
'm1377'	'Lactosylceramide sulfate'					'3928'	'17b-estradiol+NADPH+O(,2)+H(''+)=2-hydroxy-17b-estradiol+H(,2)O+NADP(''+)'
'm1378'	'Lactosylceramide sulfate'					'3929'	'17b-estradiol+NADPH+O(,2)+H(''+)=2-hydroxy-17b-estradiol+H(,2)O+NADP(''+)'
'm1379'	'Digalactosylceramidesulfate'					'3931'	'NADPH+O(,2)+H(''+)+20-hydroxy-leukotriene B(,4)=H(,2)O+NADP(''+)+20-dihydroxyleukotriene B(,4)'
'm1380'	'Digalactosylceramidesulfate'					'3933'	'NADPH+O(,2)+H(''+)+20-dihydroxyleukotriene B(,4)=H(,2)O+NADP(''+)+20-trihydroxy-leukotriene-B(,4)'
'm1381'	'4(R),8-dimethyl-trans-2-nonenoyl-CoA'					'3935'	'H(,2)O+20-oxo-leukotriene B(,4)=20-dihydroxyleukotriene B(,4) (reversible)'
'm1382'	'3-oxo-4(R),8-dimethyl-nonanoyl-CoA'					'3936'	'NADPH+O(,2)+H(''+)+12-oxo-leukotriene B(,4)=H(,2)O+NADP(''+)+12-oxo-20-hydroxy-leukotriene B(,4)'
'm1383'	'neuromedin N'					'3937'	'NADPH+O(,2)+H(''+)+12-oxo-leukotriene B(,4)=H(,2)O+NADP(''+)+12-oxo-20-hydroxy-leukotriene B(,4)'
'm1384'	'4(R),8-dimethyl-nonanoyl-CoA'					'3938'	'NADPH+O(,2)+H(''+)+12-oxo-20-hydroxy-leukotriene B(,4)=H(,2)O+NADP(''+)+12-oxo-20-dihydroxy-leukotriene B(,4)'
'm1385'	'4(R),8-dimethyl-nonanoyl-CoA'					'3939'	'NADPH+O(,2)+H(''+)+12-oxo-20-hydroxy-leukotriene B(,4)=H(,2)O+NADP(''+)+12-oxo-20-dihydroxy-leukotriene B(,4)'
'm1386'	'4(R),8-dimethyl-nonanoyl-CoA'					'3940'	'NADPH+O(,2)+H(''+)+12-oxo-20-dihydroxy-leukotriene B(,4)=H(,2)O+NADP(''+)+12-oxo-20-trihydroxy-leukotriene B(,4)'
'm1387'	'3(S)-hydroxy-4(R),8-dimethyl-nonanoyl-CoA'					'3941'	'NADPH+O(,2)+H(''+)+12-oxo-20-dihydroxy-leukotriene B(,4)=H(,2)O+NADP(''+)+12-oxo-20-trihydroxy-leukotriene B(,4)'
'm1388'	'D-Urobilinogen'					'3943'	'12-oxo-20-trihydroxy-leukotriene B(,4)=H(,2)O+H(''+)+12-oxo-20-carboxy-leukotriene B(,4)'
'm1389'	'trans,cis-dodeca-2,5-dienoyl-CoA'					'3945'	'H(,2)O+1-alkyl-2-acyl-`sn`-glycero-3-phosphocholine=H(''+)+1-alkyl-2-lyso-`sn`-glycero-3-phosphocholine+carboxylate'
'm1390'	'trans,cis-dodeca-2,5-dienoyl-CoA'					'3946'	'H(,2)O+1-alkyl-2-acyl-`sn`-glycero-3-phosphocholine=H(''+)+1-alkyl-2-lyso-`sn`-glycero-3-phosphocholine+carboxylate'
'm1391'	'3-oxolaur-cis-5-enoyl-CoA'					'3947'	'H(,2)O+1-alkyl-2-acyl-`sn`-glycero-3-phosphocholine=H(''+)+1-alkyl-2-lyso-`sn`-glycero-3-phosphocholine+carboxylate'
'm1392'	'3-oxolaur-cis-5-enoyl-CoA'					'3950'	'dolichyl D-mannosyl phosphate+mannosea1-6(ethanolaminephosphate-2)mannosea1-4(acyl)glucosaminylphosphatidylinositol=dolichyl phosphate+mannosea1-2mannosea1-6(ethanolaminephosphate-2)mannosea1-4glucosaminyl-acyl-phosphatidylinositol'
'm1393'	'3-oxolaur-6-cis-enoyl-CoA'					'3952'	'dolichyl D-mannosyl phosphate+ethanolaminephosphate-2-mannosea1-4glucosaminyl-acyl-phosphatidylinositol=dolichyl phosphate+H(''+)+mannosea1-6(ethanolaminephosphate-2)mannosea1-4(acyl)glucosaminylphosphatidylinositol'
'm1394'	'3-oxolaur-6-cis-enoyl-CoA'					'3954'	'dolichyl D-mannosyl phosphate+acylglucosaminylphosphatidylinositol=dolichyl phosphate+H(''+)+a-mannose-glucosaminyl-acyl-phosphatidylinositol'
'm1395'	'cis-laur-5-enoyl-CoA'					'3959'	'`O`-phosphoethanolamine+H(''+)+a-mannose-glucosaminyl-acyl-phosphatidylinositol=H(,2)O+ethanolaminephosphate-2-mannosea1-4glucosaminyl-acyl-phosphatidylinositol'
'm1396'	'cis-laur-5-enoyl-CoA'					'3963'	'(5`Z`,8`Z`,11`Z`,13`E`)-(15`S`)-15-Hydroperoxyeicosa-5,8,11,13-tetraenoate=14,15-DiHETE'
'm1397'	'cis-6-dodecenoyl-CoA'					'3965'	'acetyl-CoA+1-alkyl-2-lyso-`sn`-glycero-3-phosphocholine=CoA+1-alkyl-2-acetyl-`sn`-glycero-3-phosphocholine'
'm1398'	'cis-6-dodecenoyl-CoA'					'3966'	'H(,2)O+5(`S`),6(`S`)-epoxy-15(`S`)-hydroxy-7`E`,9`E`,11`Z`,13`E`-eicosatetraenoic acid anion=lipoxin B(,4)'
'm1399'	'cis-6-dodecenoyl-CoA'					'3968'	'H(,2)O+5(`S`),6(`S`)-epoxy-15(`S`)-hydroxy-7`E`,9`E`,11`Z`,13`E`-eicosatetraenoic acid anion=lipoxin B(,4)'
'm1400'	'(3S)-3-hydroxydodec-cis-6-enoyl-CoA'					'3969'	'H(,2)O+5(`S`),6(`S`)-epoxy-15(`S`)-hydroxy-7`E`,9`E`,11`Z`,13`E`-eicosatetraenoic acid anion=lipoxin B(,4)'
'm1401'	'(3S)-3-hydroxydodec-cis-6-enoyl-CoA'					'3970'	'acetyl-CoA+1-alkyl-2-lyso-`sn`-glycero-3-phosphate=CoA+1-alkyl-2-acetyl-`sn`-glycero-3-phosphate (reversible)'
'm1402'	'3(S)-3-hydroxydodecen-(5Z)-oyl-CoA'					'3971'	'H(,2)O+5(`S`),6(`S`)-epoxy-15(`S`)-hydroxy-7`E`,9`E`,11`Z`,13`E`-eicosatetraenoic acid anion=lipoxin A(,4)'
'm1403'	'3(S)-3-hydroxydodecen-(5Z)-oyl-CoA'					'3972'	'H(,2)O+5(`S`),6(`S`)-epoxy-15(`S`)-hydroxy-7`E`,9`E`,11`Z`,13`E`-eicosatetraenoic acid anion=lipoxin A(,4)'
'm1404'	'trans,cis-Lauro-2,6-dienoyl-CoA'					'3973'	'H(,2)O+5(`S`),6(`S`)-epoxy-15(`S`)-hydroxy-7`E`,9`E`,11`Z`,13`E`-eicosatetraenoic acid anion=lipoxin A(,4)'
'm1405'	'trans,cis-Lauro-2,6-dienoyl-CoA'					'3974'	'leukotriene A(,4)+NADPH+O(,2)+H(''+)=H(,2)O+NADP(''+)+5(`S`),6(`S`)-epoxy-15(`S`)-hydroxy-7`E`,9`E`,11`Z`,13`E`-eicosatetraenoic acid anion'
'm1406'	'cis,cis-3,6-Dodecadienoyl-CoA'					'3978'	'arachidonate+O(,2)+reduced acceptor=acceptor+H(,2)O+15(`R`)-Hydroxy-(5`Z`,8`Z`,11`Z`,13`E`)-eicosatetraenoate'
'm1407'	'cis,cis-3,6-Dodecadienoyl-CoA'					'3981'	'H(,2)O+1-alkyl-2-acetyl-`sn`-glycero-3-phosphate=Pi+1-alkyl-2-acetyl-`sn`-glycerol (reversible)'
'm1408'	'3-cis-Dodecenoyl-CoA'					'3983'	'phosphatidylethanolamine+mannosea1-2mannosea1-6(ethanolaminephosphate-2)mannosea1-4glucosaminyl-acyl-phosphatidylinositol=1,2-diacyl-`sn`-glycerol+EtNP-Man-Man-(EtNP)Man-GlcN-acyl-PI'
'm1409'	'3-cis-Dodecenoyl-CoA'					'3995'	'3(`S`)-2-hydroxyphytanoyl-CoA=formyl-Coa+2(`S`)-pristanal'
'm1410'	'3-cis-Dodecenoyl-CoA'					'3996'	'H(,2)O+NAD(''+)+2(`S`)-pristanal=NADH+2 H(''+)+(2`S`,6`R`,10`R`)-pristanate (reversible)'
'm1411'	'2-trans-Dodecenoyl-CoA'					'3997'	'ATP+CoA+(2`S`,6`R`,10`R`)-pristanate=AMP+PP(,i)+(2`S`)-pristanoyl-CoA'
'm1412'	'2-trans-Dodecenoyl-CoA'					'4000'	'H(,2)O+NAD(''+)+2(`R`)-pristanal=NADH+pristanate+2 H(''+)'
'm1413'	'3-Oxododecanoyl-CoA'					'4001'	'ATP+CoA+pristanate=AMP+PP(,i)+(2`R`)-pristanoyl-CoA'
'm1414'	'Lauroyl-CoA'					'4003'	'2-hydroxyphytanoyl-CoA=formyl-Coa+2(`R`)-pristanal'
'm1415'	'(S)-3-Hydroxydodecanoyl-CoA'					'4004'	'H(,2)O+`trans`-2,3-dehydropristanoyl-CoA=3(`R`)-hydroxy-pristanoyl-CoA'
'm1416'	'Heme'					'4005'	'NAD(''+)+3(`R`)-hydroxy-pristanoyl-CoA=NADH+H(''+)+3-oxopristanoyl-CoA'
'm1417'	'Heme'					'4006'	'(2`S`,6`R`,10`R`)-trimethyl-hendecanoyl-CoA=(2`R`,6`R`,10`R`)-trimethyl-hendecanoyl-CoA (reversible)'
'm1418'	'Heme'					'4007'	'O(,2)+(4`R`,8`R`,12`R`)-trimethyl-tridecanoyl-CoA=H(,2)O(,2)+(4`R`,8`R`,12`R`)-trimethyl-2`E`-tridecenoyl-CoA'
'm1419'	'Protoporphyrin'					'4008'	'O(,2)+(2`S`)-pristanoyl-CoA=H(,2)O(,2)+`trans`-2,3-dehydropristanoyl-CoA'
'm1420'	'Protoporphyrin'					'4009'	'H(,2)O+(4`R`,8`R`,12`R`)-trimethyl-2`E`-tridecenoyl-CoA=3(`R`)-hydroxy-(4`R`,8`R`,12`R`)-trimethyl-tridecanoyl-CoA'
'm1421'	'Protoporphyrinogen IX'					'4010'	'NAD(''+)+3(`R`)-hydroxy-(4`R`,8`R`,12`R`)-trimethyl-tridecanoyl-CoA=NADH+H(''+)+3-oxo-(4`R`,8`R`,12`R`)-trimethyl-tridecanoyl-CoA'
'm1422'	'trans-2-cis,cis-5,8-tetradecatrienoyl-CoA'					'4011'	'O(,2)+(2`S`,6`R`,10`R`)-trimethyl-hendecanoyl-CoA=H(,2)O(,2)+(2`S`,6`R`,10`R`)-trimethyl-2`E`-hendecenoyl-CoA'
'm1423'	'trans-2-cis,cis-5,8-tetradecatrienoyl-CoA'					'4012'	'CoA+3-oxo-(2`S`,6`R`,10`R`)-trimethyl-hendecanoyl-CoA=propionyl-CoA+4(`R`),8-dimethyl-nonanoyl-CoA'
'm1424'	'(3E,5Z,8Z)-tetradecatrienoyl-CoA'					'4014'	'NAD(''+)+3(`R`)-hydroxy-(2`S`,6`R`,10)-trimethyl-hendecanoyl-CoA=NADH+H(''+)+3-oxo-(2`S`,6`R`,10`R`)-trimethyl-hendecanoyl-CoA'
'm1425'	'trans-2-cis,cis-4,8-tetradecatrienoyl-CoA'					'4015'	'dopamine+H(,2)O(,2)=2 H(,2)O+dopamine `o`-quinone'
'm1426'	'3-oxo-cis,cis-5,8-tetradecadienoyl-CoA'					'4016'	'dopamine+H(,2)O(,2)=2 H(,2)O+dopamine `o`-quinone (reversible)'
'm1427'	'3-oxo-cis,cis-5,8-tetradecadienoyl-CoA'					'4017'	'dopamine+H(,2)O(,2)=2 H(,2)O+dopamine `o`-quinone'
'm1428'	'cis,cis-myristo-5,8-dienoyl-CoA'					'4018'	'H(,2)O(,2)+dopamine `o`-quinone=2 H(,2)O+H(''+)+dopaminochrome'
'm1429'	'cis,cis-myristo-5,8-dienoyl-CoA'					'4019'	'H(,2)O(,2)+dopamine `o`-quinone=2 H(,2)O+H(''+)+dopaminochrome'
'm1430'	'trans,cis-myristo-2,7-dienoyl-CoA'					'4020'	'H(,2)O(,2)+dopamine `o`-quinone=2 H(,2)O+H(''+)+dopaminochrome'
'm1431'	'trans,cis-myristo-2,7-dienoyl-CoA'					'4021'	'CoA+3-oxo-(4`R`,8`R`,12`R`)-trimethyl-tridecanoyl-CoA=acetyl-CoA+(2`R`,6`R`,10`R`)-trimethyl-hendecanoyl-CoA'
'm1432'	'trans-3-cis-8-tetradecadienoyl-CoA'					'4023'	'malonyl-CoA+H(''+)+g-linolenoyl-CoA=CO(,2)+CoA+3-oxo-dihomo-g-linolenoyl-CoA'
'm1433'	'trans-2-cis-8-tetradecadienoyl-CoA'					'4025'	'NADPH+H(''+)+`trans`-2-`cis`,`cis`,`cis`-8,11,14-eicosatetraenoyl-CoA=NADP(''+)+dihomo-g-linolenoyl-CoA'
'm1434'	'3-oxomyrist-7-enoyl-CoA'					'4028'	'NADPH+H(''+)+eicosa-2`E`,8`Z`,11`Z`,14`Z`,17`Z`-pentaenoyl-CoA=NADP(''+)+(8`Z`,11`Z`,14`Z`,17`Z`)-eicosatetraenoyl-CoA'
'm1435'	'3-oxomyrist-7-enoyl-CoA'					'4029'	'NADPH+H(''+)+eicosa-2`E`,8`Z`,11`Z`,14`Z`,17`Z`-pentaenoyl-CoA=NADP(''+)+(8`Z`,11`Z`,14`Z`,17`Z`)-eicosatetraenoyl-CoA'
'm1436'	'3-oxomyrist-7-enoyl-CoA'					'4030'	'NADH+O(,2)+H(''+)+(8`Z`,11`Z`,14`Z`,17`Z`)-eicosatetraenoyl-CoA=2 H(,2)O+NAD(''+)+eicosa-5,8,11,14,17-all-`cis`-pentaenoyl-CoA'
'm1437'	'3(S)-hydroxy-5Z,8Z-tetradecadienoyl-CoA'					'4033'	'NADH+O(,2)+H(''+)+a-linolenoyl-CoA=2 H(,2)O+NAD(''+)+stearidonoyl-CoA'
'm1438'	'3(S)-hydroxy-5Z,8Z-tetradecadienoyl-CoA'					'4035'	'malonyl-CoA+H(''+)+stearidonoyl-CoA=CO(,2)+CoA+3-keto-eicosa-8,11,14,17-all-`cis`-tetraenoyl-CoA'
'm1439'	'3-oxo-cis-8-tetradecenoyl-CoA'					'4039'	'NAD(''+)+5a-androstane-3b,17b-diol=NADH+H(''+)+5a-dihydrotestosterone'
'm1440'	'alpha-N-Acetyl-D-glucosaminyl-(1-_LT_4)-beta-D-glucuronosyl-(1-_LT_3)- beta-D-galactosyl-(1-_LT_3)-beta-D-galactosyl-(1-_LT_4)-beta-D- xylosylproteoglycan'					'4040'	'NADPH+H(''+)+3-keto-eicosa-8,11,14,17-all-`cis`-tetraenoyl-CoA=NADP(''+)+3(`S`)-hydroxy-all-`cis`-8,11,14,17-eicosatetraenoyl-CoA'
'm1441'	'alpha-N-Acetyl-D-glucosaminyl-(1-_LT_4)-beta-D-glucuronosyl-(1-_LT_3)- beta-D-galactosyl-(1-_LT_3)-beta-D-galactosyl-(1-_LT_4)-beta-D- xylosylproteoglycan'					'4042'	'3(`S`)-hydroxy-all-`cis`-8,11,14,17-eicosatetraenoyl-CoA=H(,2)O+eicosa-2`E`,8`Z`,11`Z`,14`Z`,17`Z`-pentaenoyl-CoA'
'm1442'	'cis-myrist-7-enoyl-CoA'					'4043'	'3(`S`)-hydroxy-all-`cis`-8,11,14,17-eicosatetraenoyl-CoA=H(,2)O+eicosa-2`E`,8`Z`,11`Z`,14`Z`,17`Z`-pentaenoyl-CoA'
'm1443'	'cis-myrist-7-enoyl-CoA'					'4044'	'ATP+CoA+a-linolenate=AMP+PP(,i)+a-linolenoyl-CoA'
'm1444'	'(2S,6R,10R)-trimethyl-2E-hendecenoyl-CoA'					'4049'	'NADPH+H(''+)+2-`trans`-7,10,13,16,19-all-`cis`-docosahexaenoyl-CoA=NADP(''+)+docosa-7,10,13,16,19-all-`cis`-pentaenoyl-CoA'
'm1445'	'cis-(3S)-hydroxytetradec-7-enoyl-CoA'					'4050'	'NADPH+H(''+)+2-`trans`-7,10,13,16,19-all-`cis`-docosahexaenoyl-CoA=NADP(''+)+docosa-7,10,13,16,19-all-`cis`-pentaenoyl-CoA'
'm1446'	'cis-(3S)-hydroxytetradec-7-enoyl-CoA'					'4051'	'malonyl-CoA+H(''+)+eicosa-5,8,11,14,17-all-`cis`-pentaenoyl-CoA=CO(,2)+CoA+3-oxo-docosa-7,10,13,16,19-all-`cis`-pentaenoyl-CoA'
'm1447'	'(3S)-3-hydroxy-cis-8-tetradecenoyl-CoA'					'4052'	'malonyl-CoA+H(''+)+eicosa-5,8,11,14,17-all-`cis`-pentaenoyl-CoA=CO(,2)+CoA+3-oxo-docosa-7,10,13,16,19-all-`cis`-pentaenoyl-CoA'
'm1448'	'3-oxo-(2S,6R,10R)-trimethyl-hendecanoyl-CoA'					'4053'	'NADPH+H(''+)+3-oxo-docosa-7,10,13,16,19-all-`cis`-pentaenoyl-CoA=NADP(''+)+3(`S`)-hydroxy-docosa-7,10,13,16,19-all-`cis`-pentaenoyl-CoA'
'm1449'	'(2S,6R,10R)-trimethyl-hendecanoyl-CoA'					'4054'	'NADPH+H(''+)+3-oxo-docosa-7,10,13,16,19-all-`cis`-pentaenoyl-CoA=NADP(''+)+3(`S`)-hydroxy-docosa-7,10,13,16,19-all-`cis`-pentaenoyl-CoA'
'm1450'	'(2R,6R,10R)-trimethyl-hendecanoyl-CoA'					'4055'	'3(`S`)-hydroxy-docosa-7,10,13,16,19-all-`cis`-pentaenoyl-CoA=H(,2)O+2-`trans`-7,10,13,16,19-all-`cis`-docosahexaenoyl-CoA'
'm1451'	'3(R)-hydroxy-(2S,6R,10)-trimethyl-hendecanoyl-CoA'					'4056'	'3(`S`)-hydroxy-docosa-7,10,13,16,19-all-`cis`-pentaenoyl-CoA=H(,2)O+2-`trans`-7,10,13,16,19-all-`cis`-docosahexaenoyl-CoA'
'm1452'	'trans-Tetradec-2-enoyl-CoA'					'4057'	'NADPH+H(''+)+2-`trans`-9,12,15,18,21-all-`cis`-tetracosahexaenoyl-CoA=NADP(''+)+tetracosa-9,12,15,18,21-all-`cis`-pentaenoyl-CoA'
'm1453'	'3-Oxotetradecanoyl-CoA'					'4058'	'NADPH+H(''+)+2-`trans`-9,12,15,18,21-all-`cis`-tetracosahexaenoyl-CoA=NADP(''+)+tetracosa-9,12,15,18,21-all-`cis`-pentaenoyl-CoA'
'm1454'	'all-trans-Heptaprenyl diphosphate'					'4059'	'malonyl-CoA+H(''+)+docosa-7,10,13,16,19-all-`cis`-pentaenoyl-CoA=CO(,2)+CoA+3-oxo-all-`cis`-6,9,12,15,18-tetracosapentaenoyl-CoA'
'm1455'	'Tetradecanoyl-CoA'					'4060'	'malonyl-CoA+H(''+)+docosa-7,10,13,16,19-all-`cis`-pentaenoyl-CoA=CO(,2)+CoA+3-oxo-all-`cis`-6,9,12,15,18-tetracosapentaenoyl-CoA'
'm1456'	'(S)-3-Hydroxytetradecanoyl-CoA'					'4061'	'NADPH+H(''+)+3-oxo-all-`cis`-6,9,12,15,18-tetracosapentaenoyl-CoA=NADP(''+)+3(`S`)-hydroxy-tetracosa-9,12,15,18,21-all-`cis`-pentaenoyl-CoA'
'm1457'	'mannosealpha1-2mannosealpha1-6(ethanolaminephosphate-2)mannosealpha1-4glucosaminyl-acyl-phosphatidylinositol'					'4062'	'NADPH+H(''+)+3-oxo-all-`cis`-6,9,12,15,18-tetracosapentaenoyl-CoA=NADP(''+)+3(`S`)-hydroxy-tetracosa-9,12,15,18,21-all-`cis`-pentaenoyl-CoA'
'm1458'	'Coproporphyrinogen III'					'4063'	'3(`S`)-hydroxy-tetracosa-9,12,15,18,21-all-`cis`-pentaenoyl-CoA=H(,2)O+2-`trans`-9,12,15,18,21-all-`cis`-tetracosahexaenoyl-CoA'
'm1459'	'Coproporphyrinogen III'					'4064'	'3(`S`)-hydroxy-tetracosa-9,12,15,18,21-all-`cis`-pentaenoyl-CoA=H(,2)O+2-`trans`-9,12,15,18,21-all-`cis`-tetracosahexaenoyl-CoA'
'm1460'	'Maltohexaose'					'4067'	'desmosterol+NADPH+H(''+)=cholesterol+NADP(''+) (reversible)'
'm1461'	'N,N''-Diacetylchitobiosyldiphosphodolichol'					'4068'	'desmosterol+NADPH+H(''+)=cholesterol+NADP(''+) (reversible)'
'm1462'	'N,N''-Diacetylchitobiosyldiphosphodolichol'					'4069'	'ATP+CoA+timnodonate=AMP+PP(,i)+eicosa-5,8,11,14,17-all-`cis`-pentaenoyl-CoA (reversible)'
'm1463'	'2E,4Z,7Z,10Z-hexadecatetraenoyl-CoA'					'4070'	'ATP+CoA+timnodonate=AMP+PP(,i)+eicosa-5,8,11,14,17-all-`cis`-pentaenoyl-CoA'
'm1464'	'trans,cis,cis-2,7,10-hexadecatrienoyl-CoA'					'4075'	'NADH+O(,2)+H(''+)+tetracosa-9,12,15,18,21-all-`cis`-pentaenoyl-CoA=2 H(,2)O+NAD(''+)+tetracosa-6,9,12,15,18,21-all-`cis`-hexaenoyl-CoA'
'm1465'	'trans,cis,cis-2,7,10-hexadecatrienoyl-CoA'					'4076'	'NADH+O(,2)+H(''+)+tetracosa-9,12,15,18,21-all-`cis`-pentaenoyl-CoA=2 H(,2)O+NAD(''+)+tetracosa-6,9,12,15,18,21-all-`cis`-hexaenoyl-CoA'
'm1466'	'4Z,7Z,10Z-hexadecatrienoyl-CoA'					'4079'	'CoA+3-oxo-all-`cis`-6,9,12,15,18,21-tetracosahexaenoyl-CoA=acetyl-CoA+docosa-4,7,10,13,16,19-all-`cis`-hexaenoyl-CoA'
'm1467'	'3Z,7Z,10Z-hexadecatrienoyl-CoA'					'4080'	'H(,2)O+`trans`-2-all-`cis`-6,9,12,15,18,21-tetracosaheptaenoyl-CoA=(3`S`)-hydroxy-tetracosa-6,9,12,15,18,21-all-`cis`-hexaenoyl-CoA'
'm1468'	'3Z,7Z,10Z-hexadecatrienoyl-CoA'					'4081'	'NAD(''+)+(3`S`)-hydroxy-tetracosa-6,9,12,15,18,21-all-`cis`-hexaenoyl-CoA=NADH+H(''+)+3-oxo-all-`cis`-6,9,12,15,18,21-tetracosahexaenoyl-CoA'
'm1469'	'3-oxo-cis,cis-7,10-hexadecadienoyl-CoA'					'4083'	'NADPH+O(,2)+H(''+)+1a,24`R`,25-trihydroxyvitamin D(,3)=2 H(,2)O+NADP(''+)+24-oxo-1a,25-dihydroxyvitamin D(,3)'
'm1470'	'3-oxo-cis,cis-7,10-hexadecadienoyl-CoA'					'4088'	'O(,2)+tetracosa-6,9,12,15,18,21-all-`cis`-hexaenoyl-CoA=H(,2)O(,2)+`trans`-2-all-`cis`-6,9,12,15,18,21-tetracosaheptaenoyl-CoA'
'm1471'	'cis,cis-palmito-7,10-dienoyl-CoA'					'4089'	'ATP+CoA+nisinate=AMP+PP(,i)+tetracosa-6,9,12,15,18,21-all-`cis`-hexaenoyl-CoA (reversible)'
'm1472'	'cis,cis-palmito-7,10-dienoyl-CoA'					'4090'	'ATP+CoA+nisinate=AMP+PP(,i)+tetracosa-6,9,12,15,18,21-all-`cis`-hexaenoyl-CoA (reversible)'
'm1473'	'trans,cis-hexadeca-2,9-dienoyl-CoA'					'4091'	'NADPH+H(''+)+docosa-4,7,10,13,16,19-all-`cis`-hexaenoyl-CoA=NADP(''+)+adrenoyl-CoA (reversible)'
'm1474'	'trans,cis-hexadeca-2,9-dienoyl-CoA'					'4092'	'NADPH+H(''+)+docosa-4,7,10,13,16,19-all-`cis`-hexaenoyl-CoA=NADP(''+)+adrenoyl-CoA'
'm1475'	'3-oxopalmitoleoyl-CoA'					'4094'	'malonyl-CoA+H(''+)+adrenoyl-CoA=CO(,2)+CoA+3-oxo-all-`cis`-6,9,12,15,18-tetracosapentaenoyl-CoA'
'm1476'	'3-oxopalmitoleoyl-CoA'					'4095'	'NADH+O(,2)+H(''+)+tetracosa-9,12,15,18-all-`cis`-tetraenoyl-CoA=2 H(,2)O+NAD(''+)+tetracosa-6,9,12,15,18-all-`cis`-pentaenoyl-CoA'
'm1477'	'3-oxopalmitoleoyl-CoA'					'4097'	'NADPH+H(''+)+2-`trans`-9,12,15,18-all-`cis`-tetracosapentaenoyl-CoA=NADP(''+)+tetracosa-9,12,15,18-all-`cis`-tetraenoyl-CoA'
'm1478'	'(3S)-3-hydroxy-cis,cis-palmito-7,10-dienoyl-CoA'					'4098'	'NADPH+H(''+)+2-`trans`-9,12,15,18-all-`cis`-tetracosapentaenoyl-CoA=NADP(''+)+tetracosa-9,12,15,18-all-`cis`-tetraenoyl-CoA'
'm1479'	'(3S)-3-hydroxy-cis,cis-palmito-7,10-dienoyl-CoA'					'4100'	'arachidonoyl-CoA+malonyl-CoA+H(''+)=CO(,2)+CoA+3-oxo-docosa-7,10,13,16-all-`cis`-tetraenoyl-CoA'
'm1480'	'palmitoleoyl-CoA'					'4102'	'NADPH+H(''+)+3-oxo-docosa-7,10,13,16-all-`cis`-tetraenoyl-CoA=NADP(''+)+3(`S`)-hydroxy-docosa-7,10,13,16-all-`cis`-tetraenoyl-CoA'
'm1481'	'palmitoleoyl-CoA'					'4104'	'3(`S`)-hydroxy-docosa-7,10,13,16-all-`cis`-tetraenoyl-CoA=H(,2)O+2`E`,7`Z`,10`Z`,13`Z`,16`Z`-docosapentaenoyl-CoA'
'm1482'	'palmitoleoyl-CoA'					'4107'	'3(`S`)-hydroxy-tetracosa-12,15,18,21-all-`cis`-tetraenoyl-CoA=H(,2)O+2-`trans`-9,12,15,18-all-`cis`-tetracosapentaenoyl-CoA'
'm1483'	'palmitoleoyl-CoA'					'4108'	'3(`S`)-hydroxy-tetracosa-12,15,18,21-all-`cis`-tetraenoyl-CoA=H(,2)O+2-`trans`-9,12,15,18-all-`cis`-tetracosapentaenoyl-CoA'
'm1484'	'(4R,8R,12R)-trimethyl-2E-tridecenoyl-CoA'					'4109'	'NAD(''+)+3(`S`)-hydroxy-tetracosa-6,9,12,15,18-all-`cis`-pentaenoyl-CoA=NADH+H(''+)+3-oxo-all-`cis`-6,9,12,15,18-tetracosapentaenoyl-CoA'
'm1485'	'(S)-3-hydroxypalmitoleoyl-CoA'					'4110'	'O(,2)+tetracosa-6,9,12,15,18-all-`cis`-pentaenoyl-CoA=H(,2)O(,2)+`trans`-2-all-`cis`-6,9,12,15,18-tetracosahexaenoyl-CoA'
'm1486'	'(S)-3-hydroxypalmitoleoyl-CoA'					'4111'	'CoA+3-oxo-all-`cis`-6,9,12,15,18-tetracosapentaenoyl-CoA=acetyl-CoA+adrenoyl-CoA'
'm1487'	'3-oxo-(4R,8R,12R)-trimethyl-tridecanoyl-CoA'					'4112'	'H(,2)O+`trans`-2-all-`cis`-6,9,12,15,18-tetracosahexaenoyl-CoA=3(`S`)-hydroxy-tetracosa-6,9,12,15,18-all-`cis`-pentaenoyl-CoA'
'm1488'	'3(R)-hydroxy-(4R,8R,12R)-trimethyl-tridecanoyl-CoA'					'4113'	'ATP+CoA+6,9,12,15,18-all-`cis`-tetracosapentaenoate=AMP+PP(,i)+tetracosa-6,9,12,15,18-all-`cis`-pentaenoyl-CoA (reversible)'
'm1489'	'trans-Hexadec-2-enoyl-CoA'					'4116'	'malonyl-CoA+H(''+)+linoleoyl-CoA=CO(,2)+CoA+3-oxoeicosa-`cis`,`cis`-11,14-dienoyl-CoA'
'm1490'	'3-Oxopalmitoyl-CoA'					'4118'	'NADPH+H(''+)+3-oxoeicosa-`cis`,`cis`-11,14-dienoyl-CoA=NADP(''+)+(3`S`)-hydroxy-eicosa-`cis,cis`-11,14-dienoyl-CoA'
'm1491'	'Palmitoyl-CoA'					'4120'	'(3`S`)-hydroxy-eicosa-`cis,cis`-11,14-dienoyl-CoA=H(,2)O+`trans`,`cis`,`cis`-2,11,14-eicosatrienoyl-CoA'
'm1492'	'Palmitoyl-CoA'					'4122'	'NADPH+H(''+)+`trans`,`cis`,`cis`-2,11,14-eicosatrienoyl-CoA=NADP(''+)+`cis`,`cis`-11,14-eicosadienoyl-CoA'
'm1493'	'Palmitoyl-CoA'					'4126'	'NADPH+H(''+)+3-oxo-docosa-`cis`,`cis`,`cis`-10,13,16-trienoyl-CoA=NADP(''+)+3(`S`)-hydroxy-10,13,16-all-`cis`-docosatrienoyl-CoA'
'm1494'	'Palmitoyl-CoA'					'4128'	'3(`S`)-hydroxy-10,13,16-all-`cis`-docosatrienoyl-CoA=H(,2)O+`trans`,`cis`,`cis`,`cis`-2,10,13,16-docosatetraenoyl-CoA'
'm1495'	'4,8,12-Trimethyltridecanoyl-CoA'					'4131'	'NADPH+H(''+)+`trans`,`cis`,`cis`,`cis`,`cis`-2,10,13,16,19-docosapentaenoyl-CoA=NADP(''+)+all-`cis`-10,13,16,19-docosatetraenoyl-CoA'
'm1496'	'(S)-3-Hydroxyhexadecanoyl-CoA'					'4132'	'NADPH+H(''+)+`trans`,`cis`,`cis`,`cis`,`cis`-2,10,13,16,19-docosapentaenoyl-CoA=NADP(''+)+all-`cis`-10,13,16,19-docosatetraenoyl-CoA'
'm1497'	'Trihexosylceramide'					'4133'	'malonyl-CoA+H(''+)+(8`Z`,11`Z`,14`Z`,17`Z`)-eicosatetraenoyl-CoA=CO(,2)+CoA+3-oxo-docosa-10,13,16,19-all-`cis`-tetraenoyl-CoA'
'm1498'	'Trihexosylceramide'					'4135'	'NADPH+H(''+)+3-oxo-docosa-10,13,16,19-all-`cis`-tetraenoyl-CoA=NADP(''+)+3(`S`)-hydroxy-docosa-10,13,16,19-all-`cis`-tetraenoyl-CoA'
'm1499'	'Trihexosylceramide'					'4136'	'NADPH+H(''+)+3-oxo-docosa-10,13,16,19-all-`cis`-tetraenoyl-CoA=NADP(''+)+3(`S`)-hydroxy-docosa-10,13,16,19-all-`cis`-tetraenoyl-CoA'
'm1500'	'Trihexosylceramide'					'4137'	'3(`S`)-hydroxy-docosa-10,13,16,19-all-`cis`-tetraenoyl-CoA=H(,2)O+`trans`,`cis`,`cis`,`cis`,`cis`-2,10,13,16,19-docosapentaenoyl-CoA'
'm1501'	'EtNP-Man-Man-(EtNP)Man-GlcN-acyl-PI'					'4138'	'3(`S`)-hydroxy-docosa-10,13,16,19-all-`cis`-tetraenoyl-CoA=H(,2)O+`trans`,`cis`,`cis`,`cis`,`cis`-2,10,13,16,19-docosapentaenoyl-CoA'
'm1502'	'18-CoA-18-oxo-dinorleukotriene B4'					'4141'	'malonyl-CoA+H(''+)+all-`cis`-10,13,16,19-docosatetraenoyl-CoA=CO(,2)+CoA+3-oxo-tetracosa-12,15,18,21-all-`cis`-tetraenoyl-CoA'
'm1503'	'18-CoA-18-oxo-dinorleukotriene B4'					'4143'	'NADPH+H(''+)+3-oxo-tetracosa-12,15,18,21-all-`cis`-tetraenoyl-CoA=NADP(''+)+3(`S`)-hydroxy-tetracosa-12,15,18,21-all-`cis`-tetraenoyl-CoA'
'm1504'	'2E,6Z,9Z,12Z-octadecatetraenoyl-CoA'					'4144'	'NADPH+H(''+)+3-oxo-tetracosa-12,15,18,21-all-`cis`-tetraenoyl-CoA=NADP(''+)+3(`S`)-hydroxy-tetracosa-12,15,18,21-all-`cis`-tetraenoyl-CoA'
'm1505'	'stearidonoyl-CoA'					'4146'	'3(`S`)-hydroxy-tetracosa-12,15,18,21-all-`cis`-tetraenoyl-CoA=H(,2)O+`trans`,`cis`,`cis`,`cis`,`cis`-2,12,15,18,21-tetracosapentaenoyl-CoA'
'm1506'	'3-oxo-6Z,9Z,12Z-octadecatrienoyl-CoA'					'4147'	'NAD(''+)+3(`S`)-hydroxy-4(`R`),8-dimethyl-nonanoyl-CoA=NADH+H(''+)+3-oxo-4(`R`),8-dimethyl-nonanoyl-CoA'
'm1507'	'3-oxo-10(S)-hydroxy-octadeca-6E,8E,12Z-trienoyl-CoA'					'4148'	'NAD(''+)+3(`S`)-hydroxy-2(`S`),6-dimethyl-heptanoyl-CoA=NADH+H(''+)+3-oxo-(2`S`)-methylisocapryloyl-CoA'
'm1508'	'3-oxo-10(S)-hydroxy-octadeca-6E,8E,12Z-trienoyl-CoA'					'4149'	'NAD(''+)+3(`S`)-hydroxy-4-methyl-pentanoyl-CoA=NADH+H(''+)+3-oxo-4-methyl-pentanoyl-CoA'
'm1509'	'3-oxo-10(R)-hydroxy-octadeca-6E,8E,12Z-trienoyl-CoA'					'4151'	'lanosterol=2 H(''+)+4,4-dimethylcholesta-8(9),14,24-trien-3b-ol+one carbon unit'
'm1510'	'3-oxo-10(R)-hydroxy-octadeca-6E,8E,12Z-trienoyl-CoA'					'4154'	'FAD+4(`R`),8-dimethyl-nonanoyl-CoA=FADH(,2)+4(`R`),8-dimethyl-`trans`-2-nonenoyl-CoA'
'm1511'	'trans,cis,cis-2,9,12-octadecatrienoyl-CoA'					'4155'	'FAD+2(`S`),6-dimethyl-heptanoyl-CoA=FADH(,2)+2,6-dimethyl-`trans`-2-heptenoyl-CoA'
'm1512'	'trans,cis,cis-2,9,12-octadecatrienoyl-CoA'					'4156'	'FAD+4-methyl-pentanoyl-CoA=FADH(,2)+4-methyl-`trans`-2-pentenoyl-CoA'
'm1513'	'alpha-linolenoyl-CoA'					'4157'	'CoA+3-oxo-4(`R`),8-dimethyl-nonanoyl-CoA=acetyl-CoA+2(`R`),6-dimethyl-heptanoyl-CoA'
'm1514'	'3-oxolinoleoyl-CoA'					'4158'	'CoA+3-oxo-(2`S`)-methylisocapryloyl-CoA=propionyl-CoA+4-methyl-pentanoyl-CoA'
'm1515'	'3-oxolinoleoyl-CoA'					'4159'	'CoA+3-oxo-4-methyl-pentanoyl-CoA=acetyl-CoA+isobutyryl-CoA'
'm1516'	'3(S)-hydroxy-6Z,9Z,12Z-octadecatrienoyl-CoA'					'4160'	'H(,2)O+4(`R`),8-dimethyl-`trans`-2-nonenoyl-CoA=3(`S`)-hydroxy-4(`R`),8-dimethyl-nonanoyl-CoA'
'm1517'	'3(S),10(R)-OH-octadeca-6-trans-4,12-cis-trienoyl-CoA'					'4161'	'H(,2)O+2,6-dimethyl-`trans`-2-heptenoyl-CoA=3(`S`)-hydroxy-2(`S`),6-dimethyl-heptanoyl-CoA'
'm1518'	'3(S),10(R)-OH-octadeca-6-trans-4,12-cis-trienoyl-CoA'					'4162'	'H(,2)O+4-methyl-`trans`-2-pentenoyl-CoA=3(`S`)-hydroxy-4-methyl-pentanoyl-CoA'
'm1519'	'trans,cis-2,9-octadecadienoyl-CoA'					'4163'	'2(`S`),6-dimethyl-heptanoyl-CoA=2(`R`),6-dimethyl-heptanoyl-CoA'
'm1520'	'(3S)-3-hydroxylinoleoyl-CoA'					'4165'	'ADP+reduced glutaredoxin=dADP+H(,2)O+glutaredoxin'
'm1521'	'(3S)-3-hydroxylinoleoyl-CoA'					'4173'	'H(''+)+SO4+5a-dihydrotestosterone=H(,2)O+5a-dihydrotestosterone sulfate'
'm1522'	'(3S)-3-hydroxylinoleoyl-CoA'					'4174'	'H(''+)+SO4+5a-dihydrotestosterone=H(,2)O+5a-dihydrotestosterone sulfate'
'm1523'	'3-oxo-cis-9-octadecenoyl-CoA'					'4175'	'H(''+)+SO4+5a-dihydrotestosterone=H(,2)O+5a-dihydrotestosterone sulfate'
'm1524'	'gamma-Linolenoyl-CoA'					'4176'	'adenosine 3'',5''-bisphosphate+H(''+)+androsterone sulfate=phosphoadenosinephosphosulfate+androsterone (reversible)'
'm1525'	'gamma-Linolenoyl-CoA'					'4177'	'androsterone+H(''+)+SO4=H(,2)O+androsterone sulfate'
'm1526'	'gamma-Linolenoyl-CoA'					'4178'	'androsterone+H(''+)+SO4=H(,2)O+androsterone sulfate'
'm1527'	'trans-octadec-2-enoyl-CoA'					'4179'	'androsterone+H(''+)+SO4=H(,2)O+androsterone sulfate'
'm1528'	'3-oxooctadecanoyl-CoA'					'4181'	'malonyl-CoA+oleoyl-CoA+H(''+)=CO(,2)+CoA+3-oxo-11-`cis`-eicosenoyl-CoA'
'm1529'	'3-oxooctadecanoyl-CoA'					'4183'	'malonyl-CoA+H(''+)+11-`cis`-eicosenoyl-CoA=CO(,2)+CoA+3-oxo-13`cis`-docosenoyl-CoA'
'm1530'	'3(S)-hydroxy-cis-9-octadecenoyl-CoA'					'4185'	'malonyl-CoA+H(''+)+`cis`-13-docosenoyl-CoA=CO(,2)+CoA+3-oxo-`cis`-15-tetracosaenoyl-CoA'
'm1531'	'Linoleoyl-CoA'					'4187'	'NADPH+H(''+)+3-oxo-11-`cis`-eicosenoyl-CoA=NADP(''+)+3(`S`)-hydroxy-11-`cis`-eicosenoyl-CoA'
'm1532'	'Linoleoyl-CoA'					'4189'	'3(`S`)-hydroxy-11-`cis`-eicosenoyl-CoA=H(,2)O+`trans`,`cis`-2,11-eicosadienoyl-CoA'
'm1533'	'Linoleoyl-CoA'					'4191'	'NADPH+H(''+)+`trans`,`cis`-2,11-eicosadienoyl-CoA=NADP(''+)+11-`cis`-eicosenoyl-CoA'
'm1534'	'Linoleoyl-CoA'					'4193'	'NADPH+H(''+)+3-oxo-13`cis`-docosenoyl-CoA=NADP(''+)+3(`S`)-hydroxy-13`cis`-docosenoyl-CoA'
'm1535'	'3-hydroxyoctadecanoyl-CoA'					'4195'	'3(`S`)-hydroxy-13`cis`-docosenoyl-CoA=H(,2)O+`trans`,`cis`-2,13-docosadienoyl-CoA'
'm1536'	'Oleoyl-CoA'					'4197'	'NADPH+H(''+)+`trans`,`cis`-2,13-docosadienoyl-CoA=NADP(''+)+`cis`-13-docosenoyl-CoA'
'm1537'	'Oleoyl-CoA'					'4202'	'NADPH+H(''+)+3-oxo-`cis`-15-tetracosaenoyl-CoA=NADP(''+)+3(`S`)-hydroxy-`cis`-15-tetracosaenoyl-CoA'
'm1538'	'3-Oxostearoyl-CoA'					'4204'	'3(`S`)-hydroxy-`cis`-15-tetracosaenoyl-CoA=H(,2)O+`trans`,`cis`-2,15-tetracosadienoyl-CoA'
'm1539'	'N-Acetyl-D-glucosaminyl-1,3-beta-D-galactosyl-1,4-D- glucosylceramide'					'4206'	'NADPH+H(''+)+`trans`,`cis`-2,15-tetracosadienoyl-CoA=NADP(''+)+`cis`-15-tetracosenoyl-CoA'
'm1540'	'N-Acetyl-D-glucosaminyl-1,3-beta-D-galactosyl-1,4-D- glucosylceramide'					'4211'	'NADPH+O(,2)+H(''+)+stearoyl-CoA=2 H(,2)O+NADP(''+)+oleoyl-CoA'
'm1541'	'Stearoyl-CoA'					'4213'	'malonyl-CoA+palmitoleoyl-CoA+H(''+)=CO(,2)+CoA+3-oxo-`cis`-9-octadecenoyl-CoA'
'm1542'	'Stearoyl-CoA'					'4215'	'NADPH+H(''+)+3-oxo-`cis`-9-octadecenoyl-CoA=NADP(''+)+3(`S`)-hydroxy-`cis`-9-octadecenoyl-CoA'
'm1543'	'Stearoyl-CoA'					'4217'	'3(`S`)-hydroxy-`cis`-9-octadecenoyl-CoA=H(,2)O+`trans`,`cis`-2,9-octadecadienoyl-CoA'
'm1544'	'Stearoyl-CoA'					'4219'	'NADPH+H(''+)+`trans`,`cis`-2,9-octadecadienoyl-CoA=NADP(''+)+oleoyl-CoA'
'm1545'	'Stearoyl-CoA'					'4221'	'palmitoyl-CoA+NADPH+O(,2)+H(''+)=2 H(,2)O+NADP(''+)+palmitoleoyl-CoA'
'm1546'	'N-Acylglycine'					'4222'	'palmitoyl-CoA+NADPH+O(,2)+H(''+)=2 H(,2)O+NADP(''+)+palmitoleoyl-CoA'
'm1547'	'Propenoate'					'4225'	'H(,2)O+24-`trans`-trihydroxycoprostenoyl-CoA=24(`R`),25(`R`)-varanoyl-CoA (reversible)'
'm1548'	'Methylglyoxal'					'4227'	'CoA+24-oxo-25(`R`)-trihydroxycoprostanoyl-CoA=propionyl-CoA+choloyl-CoA'
'm1549'	'Methylglyoxal'					'4229'	'NAD(''+)+24(`R`),25(`R`)-varanoyl-CoA=NADH+H(''+)+24-oxo-25(`R`)-trihydroxycoprostanoyl-CoA'
'm1550'	'malonic dialdehyde'					'4230'	'NAD(''+)+24(`R`),25(`R`)-varanoyl-CoA=NADH+H(''+)+24-oxo-25(`R`)-trihydroxycoprostanoyl-CoA'
'm1551'	'Pyruvate'					'4240'	'H(,2)O+12,13-epoxyoctadec-9(`Z`)-enoate=12,13-hydroxyoctadec-9(`Z`)-enoate'
'm1552'	'Pyruvate'					'4242'	'H(,2)O+9,10-epoxyoctadec-12(`Z`)-enoate=9,10-hydroxyoctadec-12(`Z`)-enoate'
'm1553'	'Pyruvate'					'4255'	'CDP-ethanolamine+1,2-diacyl-`sn`-glycerol=CMP+phosphatidylethanolamine+H(''+) (reversible)'
'm1554'	'3-Oxopropanoate'					'4256'	'CDP-ethanolamine+1,2-diacyl-`sn`-glycerol=CMP+phosphatidylethanolamine+H(''+)'
'm1555'	'Mercaptopyruvate'					'4257'	'CDP-ethanolamine+1,2-diacyl-`sn`-glycerol=CMP+phosphatidylethanolamine+H(''+)'
'm1556'	'Mercaptopyruvate'					'4263'	'H(,2)O+L-a-Phosphatidylinositol=`myo`-inositol+phosphatidate+H(''+)'
'm1557'	'Hydroxypyruvate'					'4264'	'H(,2)O+L-a-Phosphatidylinositol=`myo`-inositol+phosphatidate+H(''+)'
'm1558'	'Hydroxypyruvate'					'4265'	'H(,2)O+L-a-Phosphatidylinositol=`myo`-inositol+phosphatidate+H(''+)'
'm1559'	'2-Hydroxy-3-oxopropanoate'					'4272'	'arachidonate+FADH(,2)+O(,2)=FAD+H(,2)O+5,6-epoxy-(8Z,11Z,14Z)-eicosatrienoic acid'
'm1560'	'3-Sulfinylpyruvate'					'4274'	'arachidonate+FADH(,2)+O(,2)=FAD+H(,2)O+11,12-epoxy-(5`Z`,8`Z`,14`Z`)-eicosatrienoate'
'm1561'	'3-Sulfinylpyruvate'					'4276'	'arachidonate+FADH(,2)+O(,2)=FAD+H(,2)O+8,9-epoxy-(5Z,11Z,14Z)-eicosatrienoic acid'
'm1562'	'Phosphoenolpyruvate'					'4281'	'phosphatidylethanolamine+L-serine=ethanolamine+L-a-Phosphatidylserine'
'm1563'	'Phosphoenolpyruvate'					'4283'	'H(,2)O+L-a-Phosphatidylserine=phosphatidate+H(''+)+L-serine'
'm1564'	'plasmenate'					'4284'	'H(,2)O+L-a-Phosphatidylserine=phosphatidate+H(''+)+L-serine'
'm1565'	'plasmenate'					'4285'	'H(,2)O+L-a-Phosphatidylserine=phosphatidate+H(''+)+L-serine'
'm1566'	'plasmenate'					'4290'	'H(,2)O+1-acyl-2-lyso-phosphatidylserine=H(''+)+glycerophosphoserine+carboxylate'
'm1567'	'3-Phosphonooxypyruvate'					'4292'	'H(,2)O+1-acyl-2-lyso-phosphatidylserine=H(''+)+glycerophosphoserine+carboxylate'
'm1568'	'(-)-Ureidoglycolate'					'4293'	'H(''+)+1-acyl-2-lyso-phosphatidylserine+carboxylate=H(,2)O+L-a-Phosphatidylserine'
'm1569'	'Propanal'					'4294'	'H(''+)+1-acyl-2-lyso-phosphatidylserine+carboxylate=H(,2)O+L-a-Phosphatidylserine'
'm1570'	'Propanoate'					'4295'	'H(''+)+1-acyl-2-lyso-phosphatidylserine+carboxylate=H(,2)O+L-a-Phosphatidylserine'
'm1571'	'Propanoate'					'4297'	'NADP(''+)+6-`trans`-leukotriene B(,4)=NADPH+H(''+)+5-oxo-6-`trans`-leukotriene B(,4) (reversible)'
'm1572'	'Propanoate'					'4300'	'NADPH+H(''+)+5-oxo-6-`trans`-leukotriene B(,4)=NADP(''+)+6,7-dihydro-5-oxo-leukotriene B(,4)'
'm1573'	'Hydroxyacetone'					'4301'	'NADPH+H(''+)+5-oxo-6-`trans`-leukotriene B(,4)=NADP(''+)+6,7-dihydro-5-oxo-leukotriene B(,4)'
'm1574'	'Lactaldehyde'					'4302'	'NADPH+H(''+)+5-oxo-6-`trans`-leukotriene B(,4)=NADP(''+)+6,7-dihydro-5-oxo-leukotriene B(,4)'
'm1575'	'(S)-Lactate'					'4303'	'NADPH+H(''+)+5-oxo-6-`trans`-leukotriene B(,4)=NADP(''+)+6,7-dihydro-5-oxo-leukotriene B(,4)'
'm1576'	'(R)-Lactate'					'4304'	'NADPH+H(''+)+6,7-dihydro-5-oxo-leukotriene B(,4)=NADP(''+)+6,7-dihydro-leukotriene B(,4)'
'm1577'	'D-Glyceraldehyde'					'4308'	'NADP(''+)+6,7-dihydro-leukotriene B(,4)=NADPH+H(''+)+6,7-dihydro-5-oxo-leukotriene B(,4)'
'm1578'	'D-Glyceraldehyde'					'4311'	'NADPH+H(''+)+5-oxo-6`E`-12-`epi`-LTB(,4)=NADP(''+)+6,7-dihydro-5-oxo-12-`epi`-LTB(,4)'
'm1579'	'D-Glyceraldehyde'					'4313'	'NADPH+H(''+)+6,7-dihydro-5-oxo-12-`epi`-LTB(,4)=NADP(''+)+6,7-dihydro-12-`epi`-LTB(,4)'
'm1580'	'D-Glyceraldehyde'					'4320'	'NADP(''+)+6,7-dihydro-12-`epi`-LTB(,4)=NADPH+H(''+)+6,7-dihydro-5-oxo-12-`epi`-LTB(,4)'
'm1581'	'3-Hydroxypropanoate'					'4322'	'GDP+reduced glutaredoxin=dGDP+H(,2)O+glutaredoxin'
'm1582'	'1-alkyl-2-acyl-sn-glycerol'					'4323'	'isobutyryl-CoA+D-Dihydro-6,8-dithiooctamide=CoA+6-`S`-(2-methylpropanoyl)-D-dihydro-6,8-dithiooctamide'
'm1583'	'1-alkyl-2-acyl-sn-glycerol'					'4326'	'2 glutathione+9-HpODE=H(,2)O+Oxidized glutathione+9-hydroxyoctadecadienoate'
'm1584'	'1-alkyl-2-acyl-sn-glycerol'					'4328'	'2 glutathione+9-HpODE=H(,2)O+Oxidized glutathione+9-hydroxyoctadecadienoate'
'm1585'	'D-Glycerate'					'4330'	'reduced acceptor+9-HpODE=acceptor+H(,2)O+9-hydroxyoctadecadienoate (reversible)'
'm1586'	'D-Glycerate'					'4331'	'O(,2)+5-oxo-12(`R`)-hydroxy-eicosa-8`E`,10`E`,14`Z`-trienoyl-CoA=H(,2)O(,2)+5-oxo-12(`R`)-hydroxy-eicosa-2`E`,8`E`,10`E`,14`Z`-tetraenoyl-CoA'
'm1587'	'D-Glycerate'					'4332'	'O(,2)+5-oxo-12(`R`)-hydroxy-eicosa-8`E`,10`E`,14`Z`-trienoyl-CoA=H(,2)O(,2)+5-oxo-12(`R`)-hydroxy-eicosa-2`E`,8`E`,10`E`,14`Z`-tetraenoyl-CoA'
'm1588'	'D-Glycerate'					'4333'	'ATP+CoA+6,7-dihydro-5-oxo-leukotriene B(,4)=AMP+PP(,i)+5-oxo-12(`R`)-hydroxy-eicosa-8`E`,10`E`,14`Z`-trienoyl-CoA'
'm1589'	'O-Alkylglycerone phosphate'					'4334'	'ATP+CoA+6,7-dihydro-5-oxo-leukotriene B(,4)=AMP+PP(,i)+5-oxo-12(`R`)-hydroxy-eicosa-8`E`,10`E`,14`Z`-trienoyl-CoA'
'm1590'	'alk-1-enyl-2-lyso-glycerophosphate'					'4335'	'ATP+CoA+6,7-dihydro-5-oxo-leukotriene B(,4)=AMP+PP(,i)+5-oxo-12(`R`)-hydroxy-eicosa-8`E`,10`E`,14`Z`-trienoyl-CoA'
'm1591'	'alk-1-enyl-2-lyso-glycerophosphate'					'4336'	'ATP+CoA+6,7-dihydro-5-oxo-leukotriene B(,4)=AMP+PP(,i)+5-oxo-12(`R`)-hydroxy-eicosa-8`E`,10`E`,14`Z`-trienoyl-CoA'
'm1592'	'alk-1-enyl-2-lyso-glycerophosphate'					'4337'	'CoA+3,5-dioxo-12(`R`)-hydroxy-eicosa-8`E`,10`E`,14`Z`-trienoyl-CoA=acetyl-CoA+3-oxo-10(`R`)-hydroxy-octadeca-6`E`,8`E`,12`Z`-trienoyl-CoA'
'm1593'	'3-Aminopropanal'					'4338'	'CoA+3,5-dioxo-12(`R`)-hydroxy-eicosa-8`E`,10`E`,14`Z`-trienoyl-CoA=acetyl-CoA+3-oxo-10(`R`)-hydroxy-octadeca-6`E`,8`E`,12`Z`-trienoyl-CoA'
'm1594'	'3-Aminopropanal'					'4339'	'H(,2)O+5-oxo-12(`R`)-hydroxy-eicosa-2`E`,8`E`,10`E`,14`Z`-tetraenoyl-CoA=3(`S`),12(`R`)-dihydroxy-5-oxo-eicosa-8`E`,10`E`,14`Z`-trienoyl-CoA'
'm1595'	'L-Alanine'					'4340'	'H(,2)O+5-oxo-12(`R`)-hydroxy-eicosa-2`E`,8`E`,10`E`,14`Z`-tetraenoyl-CoA=3(`S`),12(`R`)-dihydroxy-5-oxo-eicosa-8`E`,10`E`,14`Z`-trienoyl-CoA'
'm1596'	'L-Alanine'					'4341'	'NAD(''+)+3(`S`),12(`R`)-dihydroxy-5-oxo-eicosa-8`E`,10`E`,14`Z`-trienoyl-CoA=NADH+H(''+)+3,5-dioxo-12(`R`)-hydroxy-eicosa-8`E`,10`E`,14`Z`-trienoyl-CoA'
'm1597'	'L-Alanine'					'4342'	'NAD(''+)+3(`S`),12(`R`)-dihydroxy-5-oxo-eicosa-8`E`,10`E`,14`Z`-trienoyl-CoA=NADH+H(''+)+3,5-dioxo-12(`R`)-hydroxy-eicosa-8`E`,10`E`,14`Z`-trienoyl-CoA'
'm1598'	'L-Alanine'					'4343'	'NAD(''+)+3(`S`),12(`R`)-dihydroxy-5-oxo-eicosa-8`E`,10`E`,14`Z`-trienoyl-CoA=NADH+H(''+)+3,5-dioxo-12(`R`)-hydroxy-eicosa-8`E`,10`E`,14`Z`-trienoyl-CoA'
'm1599'	'beta-Alanine'					'4345'	'H(,2)O+3-oxo-10(`R`)-hydroxy-octadeca-6`E`,8`E`,12`Z`-trienoyl-CoA=CoA+H(''+)+3-oxo-10(`R`)-hydroxy-octadeca-6`E`,8`E`,12`Z`-trienoate'
'm1600'	'beta-Alanine'					'4346'	'H(,2)O+3-oxo-10(`R`)-hydroxy-octadeca-6`E`,8`E`,12`Z`-trienoyl-CoA=CoA+H(''+)+3-oxo-10(`R`)-hydroxy-octadeca-6`E`,8`E`,12`Z`-trienoate'
'm1601'	'beta-Alanine'					'4347'	'NAD(''+)+3(`S`),12(`S`)-dihydroxy-5-oxo-eicosa-8`E`,10`E`,14`Z`-trienoyl-CoA=NADH+H(''+)+3,5-dioxo-12(`S`)-hydroxy-eicosa-8`E`,10`E`,14`Z`-trienoyl-CoA'
'm1602'	'Sarcosine'					'4348'	'NAD(''+)+3(`S`),12(`S`)-dihydroxy-5-oxo-eicosa-8`E`,10`E`,14`Z`-trienoyl-CoA=NADH+H(''+)+3,5-dioxo-12(`S`)-hydroxy-eicosa-8`E`,10`E`,14`Z`-trienoyl-CoA'
'm1603'	'Sarcosine'					'4349'	'NAD(''+)+3(`S`),12(`S`)-dihydroxy-5-oxo-eicosa-8`E`,10`E`,14`Z`-trienoyl-CoA=NADH+H(''+)+3,5-dioxo-12(`S`)-hydroxy-eicosa-8`E`,10`E`,14`Z`-trienoyl-CoA'
'm1604'	'Sarcosine'					'4352'	'CoA+3,5-dioxo-12(`S`)-hydroxy-eicosa-8`E`,10`E`,14`Z`-trienoyl-CoA=acetyl-CoA+3-oxo-10(`S`)-hydroxy-octadeca-6`E`,8`E`,12`Z`-trienoyl-CoA'
'm1605'	'Sarcosine'					'4353'	'CoA+3,5-dioxo-12(`S`)-hydroxy-eicosa-8`E`,10`E`,14`Z`-trienoyl-CoA=acetyl-CoA+3-oxo-10(`S`)-hydroxy-octadeca-6`E`,8`E`,12`Z`-trienoyl-CoA'
'm1606'	'L-Cysteine'					'4356'	'H(,2)O+3-oxo-10(`S`)-hydroxy-octadeca-6`E`,8`E`,12`Z`-trienoyl-CoA=CoA+H(''+)+3-oxo-10(`S`)-hydroxy-octadeca-6`E`,8`E`,12`Z`-trienoate'
'm1607'	'L-Cysteine'					'4357'	'H(,2)O+5-oxo-12(`S`)-hydroxy-eicosa-2`E`,8`E`,10`E`,14`Z`-tetraenoyl-CoA=3(`S`),12(`S`)-dihydroxy-5-oxo-eicosa-8`E`,10`E`,14`Z`-trienoyl-CoA'
'm1608'	'L-Cysteine'					'4360'	'ATP+CoA+6,7-dihydro-5-oxo-12-`epi`-LTB(,4)=AMP+PP(,i)+5-oxo-12(`S`)-hydroxy-eicosa-8`E`,10`E`,14`Z`-trienoyl-CoA'
'm1609'	'L-Serine'					'4361'	'ATP+CoA+6,7-dihydro-5-oxo-12-`epi`-LTB(,4)=AMP+PP(,i)+5-oxo-12(`S`)-hydroxy-eicosa-8`E`,10`E`,14`Z`-trienoyl-CoA'
'm1610'	'L-Serine'					'4362'	'ATP+CoA+6,7-dihydro-5-oxo-12-`epi`-LTB(,4)=AMP+PP(,i)+5-oxo-12(`S`)-hydroxy-eicosa-8`E`,10`E`,14`Z`-trienoyl-CoA'
'm1611'	'L-Serine'					'4363'	'NADH+2 H(''+)+3a,7a,12a-trihydroxy-5b-cholestanoic acid anion=H(,2)O+NAD(''+)+3a,7a,12a-trihydroxy-5b-cholestan-27-al'
'm1612'	'L-Serine'					'4364'	'NADH+2 H(''+)+3a,7a,12a-trihydroxy-5b-cholestanoic acid anion=H(,2)O+NAD(''+)+3a,7a,12a-trihydroxy-5b-cholestan-27-al'
'm1613'	'L-Serine'					'4365'	'NADH+2 H(''+)+3a,7a,12a-trihydroxy-5b-cholestanoic acid anion=H(,2)O+NAD(''+)+3a,7a,12a-trihydroxy-5b-cholestan-27-al'
'm1614'	'D-Serine'					'4366'	'FAD+H(''+)+NAD(P)H=FADH(,2)+NAD(P)(''+) (reversible)'
'm1615'	'3-Sulfino-L-alanine'					'4374'	'2 H(,2)O+2 NAD(''+)+spermine dialdehyde=2 NADH+4 H(''+)+spermic acid 2'
'm1616'	'3-Sulfino-L-alanine'					'4375'	'2 H(,2)O+2 NAD(''+)+spermine dialdehyde=2 NADH+4 H(''+)+spermic acid 2'
'm1617'	'alkylglycerol'					'4376'	'2 H(,2)O+2 NAD(''+)+spermine dialdehyde=2 NADH+4 H(''+)+spermic acid 2'
'm1618'	'Glycerone phosphate'					'4377'	'2 H(,2)O+2 NAD(''+)+spermidine dialdehyde=2 NADH+4 H(''+)+spermidic acid'
'm1619'	'Glycerone phosphate'					'4378'	'2 H(,2)O+2 NAD(''+)+spermidine dialdehyde=2 NADH+4 H(''+)+spermidic acid'
'm1620'	'D-Glyceraldehyde 3-phosphate'					'4379'	'2 H(,2)O+2 NAD(''+)+spermidine dialdehyde=2 NADH+4 H(''+)+spermidic acid'
'm1621'	'DL-Glyceraldehyde 3-phosphate'					'4381'	'2 NADPH+2 O(,2)+H(''+)+13''-hydroxy-a-tocotrienol=3 H(,2)O+2 NADP(''+)+13''-carboxy-a-tocotrienol'
'm1622'	'3-Phospho-D-glycerate'					'4384'	'H(,2)O+1-alkyl-2-acetyl-`sn`-glycero-3-phosphocholine=choline phosphate+H(''+)+1-alkyl-2-acetyl-`sn`-glycerol'
'm1623'	'2-Phospho-D-glycerate'					'4386'	'H(,2)O+a-CEHC-glucuronide=D-glucuronate+H(''+)+3''-carboxy-a-chromanol'
'm1624'	'2-Phospho-D-glycerate'					'4387'	'H(,2)O+a-CEHC-glucuronide=D-glucuronate+H(''+)+3''-carboxy-a-chromanol'
'm1625'	'O-Phospho-L-serine'					'4389'	'CoA+3-oxo-10(`R`)-hydroxy-octadeca-6`E`,8`E`,12`Z`-trienoate=acetyl-CoA+8(`R`)-hydroxy-hexadeca-4`E`,6`E`,10`Z`-trienoate'
'm1626'	'3-Phospho-D-glyceroyl phosphate'					'4390'	'CoA+3-oxo-8(`R`)-hydroxy-hexadeca-6`E`,10`Z`-dienoate=acetyl-CoA+6(`R`)-hydroxy-tetradeca-4`E`,8`Z`-dienoate'
'm1627'	'2,3-Bisphospho-D-glycerate'					'4391'	'O(,2)+8(`R`)-hydroxy-hexadeca-4`E`,6`E`,10`Z`-trienoate=H(,2)O(,2)+8(`R`)-hydroxy-hexadeca-2`E`,4`E`,6`E`,10`Z`-tetraenoate'
'm1628'	'Propane-1,2-diol'					'4392'	'H(,2)O+8(`R`)-hydroxy-hexadeca-2`E`,6`E`,10`Z`-trienoate=3(`S`),8(`R`)-dihydroxy-6`E`,10`Z`-hexadecadienoate'
'm1629'	'(S)-Propane-1,2-diol'					'4393'	'NAD(''+)+3(`S`),8(`R`)-dihydroxy-6`E`,10`Z`-hexadecadienoate=NADH+H(''+)+3-oxo-8(`R`)-hydroxy-hexadeca-6`E`,10`Z`-dienoate'
'm1630'	'Glycerol'					'4394'	'CoA+3-oxo-6(`R`)-hydroxy-tetradec-8-`cis`-enoate=acetyl-CoA+4(`R`)-hydroxy-dodec-6`Z`-enoate'
'm1631'	'Glycerol'					'4395'	'O(,2)+6(`R`)-hydroxy-tetradeca-4`E`,8`Z`-dienoate=H(,2)O(,2)+6(`R`)-hydroxy-tetradeca-2`E`,4`E`,8`Z`-trienoate'
'm1632'	'Glycerol'					'4396'	'H(,2)O+6(`R`)-hydroxy-tetradeca-2`E`,8`Z`-dienoate=3(`S`),6(`R`)-dihydroxy-tetradec-8`Z`-enoate'
'm1633'	'Glycerol'					'4397'	'NADPH+H(''+)+8(`R`)-hydroxy-hexadeca-2`E`,4`E`,6`E`,10`Z`-tetraenoate=NADP(''+)+8(`R`)-hydroxy-hexadeca-2`E`,6`E`,10`Z`-trienoate'
'm1634'	'Glycerol'					'4398'	'NADPH+H(''+)+6(`R`)-hydroxy-tetradeca-2`E`,4`E`,8`Z`-trienoate=NADP(''+)+6(`R`)-hydroxy-tetradeca-2`E`,8`Z`-dienoate'
'm1635'	'1-Alkyl-sn-glycero-3-phosphate'					'4399'	'NAD(''+)+3(`S`),6(`R`)-dihydroxy-tetradec-8`Z`-enoate=NADH+H(''+)+3-oxo-6(`R`)-hydroxy-tetradec-8-`cis`-enoate'
'm1636'	'sn-Glycerol 3-phosphate'					'4400'	'CoA+3-oxo-8(`S`)-hydroxy-hexadeca-6`E`,10`Z`-dienoate=acetyl-CoA+6(`S`)-hydroxy-tetradeca-4`E`,8`Z`-dienoate'
'm1637'	'sn-Glycerol 3-phosphate'					'4402'	'CoA+3-oxo-10(`S`)-hydroxy-octadeca-6`E`,8`E`,12`Z`-trienoate=acetyl-CoA+8(`S`)-hydroxy-hexadeca-4`E`,6`E`-10`Z`-trienoate'
'm1638'	'Uroporphyrinogen III'					'4404'	'H(,2)O+8(`S`)-hydroxy-hexadeca-2`E`,6`E`,10`Z`-trienoate=3(`S`),8(`S`)-dihydroxy-6`E`,10`Z`-hexadecadienoate'
'm1639'	'Hydroxymethylbilane'					'4405'	'NAD(''+)+3(`S`),8(`S`)-dihydroxy-6`E`,10`Z`-hexadecadienoate=NADH+H(''+)+3-oxo-8(`S`)-hydroxy-hexadeca-6`E`,10`Z`-dienoate'
'm1640'	'beta-Carotene'					'4407'	'H(,2)O+6(`S`)-hydroxy-tetradeca-2`E`,8`Z`-dienoate=3(`S`),6(`S`)-dihydroxy-tetradec-8`Z`-enoate'
'm1641'	'beta-Carotene'					'4408'	'NAD(''+)+3(`S`),6(`S`)-dihydroxy-tetradec-8`Z`-enoate=NADH+H(''+)+3-oxo-6(`S`)-hydroxy-tetradec-8`Z`-enoate'
'm1642'	'13E-tetranor-16-oxo-16-CoA-LTE4'					'4409'	'NADPH+H(''+)+8(`S`)-hydroxy-hexadeca-2`E`,4`E`,6`E`,10`Z`-tetraenoate=NADP(''+)+8(`S`)-hydroxy-hexadeca-2`E`,6`E`,10`Z`-trienoate'
'm1643'	'CoA-omega-COOH-tetranor-LTE3'					'4410'	'NADPH+H(''+)+6(`S`)-hydroxy-tetradeca-2`E`,4`E`,8`Z`-trienoate=NADP(''+)+6(`S`)-hydroxy-tetradeca-2`E`,8`Z`-dienoate'
'm1644'	'trans-2,3-dehydropristanoyl-CoA'					'4416'	'H(,2)O+13(`S`)-hydroperoxy-(9`E`,11`E`)-octadecadienoate=nonanate+4-hydroperoxy-2-nonenal'
'm1645'	'(2S)-pristanoyl-CoA'					'4422'	'2 glutathione+13(`S`)-hydroperoxy-(9`E`,11`E`)-octadecadienoate=H(,2)O+Oxidized glutathione+13-hydroxy-(9`Z`,11`E`)-octadecadienoate'
'm1646'	'(2R)-pristanoyl-CoA'					'4424'	'2 glutathione+13(`S`)-hydroperoxy-(9`E`,11`E`)-octadecadienoate=H(,2)O+Oxidized glutathione+13-hydroxy-(9`Z`,11`E`)-octadecadienoate'
'm1647'	'(2R)-pristanoyl-CoA'					'4427'	'prostaglandin J(,2)=D12-Prostaglandin J(,2) (reversible)'
'm1648'	'3(R)-hydroxy-pristanoyl-CoA'					'4434'	'ATP+2 CoA+2 H(,2)O+NAD(''+)+NADH+O(,2)+H(''+)+14,15-epoxy-(5`Z`,8`Z`,11`Z`)-eicosatrienoate=acetyl-CoA+AMP+CoA+H(,2)O(,2)+NAD(''+)+NADH+PP(,i)+2 H(''+)+12,13-epoxy-(6`Z`,9`Z`)-octadecadienoic acid'
'm1649'	'all-trans-Octaprenyl diphosphate'					'4435'	'ATP+2 CoA+2 H(,2)O+NAD(''+)+O(,2)+12,13-epoxy-(6`Z`,9`Z`)-octadecadienoic acid=acetyl-CoA+AMP+CoA+H(,2)O(,2)+NADH+PP(,i)+2 H(''+)+10,11-epoxy-(4`Z`,7`Z`)-hexadecadienoic acid'
'm1650'	'3-Oxopristanoyl-CoA'					'4437'	'NADH+H(''+)+12-oxo-leukotriene B(,4)=NAD(''+)+10,11-dihydro-12-oxo-LTB(,4)'
'm1651'	'18E-20-oxo-20-CoA-LTB4'					'4441'	'NADPH+H(''+)+10,11-dihydro-12-oxo-LTB(,4)=NADP(''+)+10,11-dihydro-leukotriene B(,4)'
'm1652'	'18E-20-oxo-20-CoA-LTB4'					'4442'	'NADPH+H(''+)+10,11-dihydro-12-oxo-LTB(,4)=NADP(''+)+10,11-dihydro-leukotriene B(,4)'
'm1653'	'18,20-dioxo-20-CoA-leukotriene B4'					'4443'	'NADPH+H(''+)+10,11-dihydro-12-oxo-LTB(,4)=NADP(''+)+10,11-dihydro-leukotriene B(,4)'
'm1654'	'18,20-dioxo-20-CoA-leukotriene B4'					'4444'	'NADPH+H(''+)+10,11-dihydro-12-oxo-LTB(,4)=NADP(''+)+10,11-dihydro-12-epi-leukotriene B(,4)'
'm1655'	'18,20-dioxo-20-CoA-leukotriene B4'					'4445'	'NADPH+H(''+)+10,11-dihydro-12-oxo-LTB(,4)=NADP(''+)+10,11-dihydro-12-epi-leukotriene B(,4) (reversible)'
'm1656'	'20-CoA-20-oxo-leukotriene B4'					'4446'	'NADPH+H(''+)+10,11-dihydro-12-oxo-LTB(,4)=NADP(''+)+10,11-dihydro-12-epi-leukotriene B(,4) (reversible)'
'm1657'	'20-CoA-20-oxo-leukotriene B4'					'4448'	'NADPH+O(,2)+H(''+)+10,11-dihydro-leukotriene B(,4)=H(,2)O+NADP(''+)+20-OH-10,11-dihydro-leukotriene B(,4)'
'm1658'	'20-CoA-20-oxo-leukotriene B4'					'4450'	'NADPH+O(,2)+H(''+)+10,11-dihydro-20-dihydroxy-LTB(,4)=H(,2)O+NADP(''+)+10,11-dihydro-20-trihydroxy-leukotriene B(,4)'
'm1659'	'20-CoA-20-oxo-leukotriene B4'					'4452'	'NADPH+O(,2)+H(''+)+20-OH-10,11-dihydro-leukotriene B(,4)=H(,2)O+NADP(''+)+10,11-dihydro-20-dihydroxy-LTB(,4)'
'm1660'	'20-CoA-20-oxo-18R-hydroxyleucotriene B4'					'4460'	'CoA+3-oxo-5(`S`),12(`R`)-dihydroxy-eicosa-8-`trans`-6,14-`cis`-trienoyl-CoA=acetyl-CoA+3(`S`),10(`R`)-OH-octadeca-6-`trans`-4,12-`cis`-trienoyl-CoA'
'm1661'	'20-CoA-20-oxo-18R-hydroxyleucotriene B4'					'4461'	'CoA+3-oxo-5(`S`),12(`R`)-dihydroxy-eicosa-8-`trans`-6,14-`cis`-trienoyl-CoA=acetyl-CoA+3(`S`),10(`R`)-OH-octadeca-6-`trans`-4,12-`cis`-trienoyl-CoA'
'm1662'	'20-CoA-20-oxo-18R-hydroxyleucotriene B4'					'4464'	'H(,2)O+3(`S`),10(`R`)-OH-octadeca-6-`trans`-4,12-`cis`-trienoyl-CoA=CoA+H(''+)+3(`S`),10(`R`)-OH-octadeca-6-`trans`-4,12-`cis`-trienoate'
'm1663'	'2-trans-cis,cis,cis,cis-4,8,11,14-eicosapentaenoyl-CoA'					'4465'	'O(,2)+10,11-dihydro-LTB(,4)-CoA=H(,2)O(,2)+5(`S`),12(`R`)-dihydroxy-eicosa-2,8-`trans`-6,14-`cis`-tetraenoyl-CoA'
'm1664'	'2-trans-cis,cis,cis,cis-4,8,11,14-eicosapentaenoyl-CoA'					'4466'	'O(,2)+10,11-dihydro-LTB(,4)-CoA=H(,2)O(,2)+5(`S`),12(`R`)-dihydroxy-eicosa-2,8-`trans`-6,14-`cis`-tetraenoyl-CoA'
'm1665'	'eicosa-2E,8Z,11Z,14Z,17Z-pentaenoyl-CoA'					'4467'	'ATP+CoA+10,11-dihydro-leukotriene B(,4)=AMP+PP(,i)+10,11-dihydro-LTB(,4)-CoA'
'm1666'	'eicosa-2E,8Z,11Z,14Z,17Z-pentaenoyl-CoA'					'4468'	'ATP+CoA+10,11-dihydro-leukotriene B(,4)=AMP+PP(,i)+10,11-dihydro-LTB(,4)-CoA'
'm1667'	'eicosa-5,8,11,14,17-all-cis-pentaenoyl-CoA'					'4469'	'ATP+CoA+10,11-dihydro-leukotriene B(,4)=AMP+PP(,i)+10,11-dihydro-LTB(,4)-CoA'
'm1668'	'eicosa-5,8,11,14,17-all-cis-pentaenoyl-CoA'					'4470'	'ATP+CoA+10,11-dihydro-leukotriene B(,4)=AMP+PP(,i)+10,11-dihydro-LTB(,4)-CoA'
'm1669'	'trans-3-cis-5,8,11,14-eicosapentaenoyl-CoA'					'4471'	'H(,2)O+5(`S`),12(`R`)-dihydroxy-eicosa-2,8-`trans`-6,14-`cis`-tetraenoyl-CoA=3(`S`),5(`S`),12(`R`)-trihydroxy-eicosa-8-`trans`-6,14-`cis`-trienoyl-CoA'
'm1670'	'trans-3-cis-5,8,11,14-eicosapentaenoyl-CoA'					'4473'	'NAD(''+)+3(`S`),5(`S`),12(`R`)-trihydroxy-eicosa-8-`trans`-6,14-`cis`-trienoyl-CoA=NADH+H(''+)+3-oxo-5(`S`),12(`R`)-dihydroxy-eicosa-8-`trans`-6,14-`cis`-trienoyl-CoA'
'm1671'	'3-keto-eicosa-8,11,14,17-all-cis-tetraenoyl-CoA'					'4474'	'NAD(''+)+3(`S`),5(`S`),12(`R`)-trihydroxy-eicosa-8-`trans`-6,14-`cis`-trienoyl-CoA=NADH+H(''+)+3-oxo-5(`S`),12(`R`)-dihydroxy-eicosa-8-`trans`-6,14-`cis`-trienoyl-CoA'
'm1672'	'5-oxo-12(S)-hydroxy-eicosa-2E,8E,10E,14Z-tetraenoyl-CoA'					'4475'	'NAD(''+)+3(`S`),5(`S`),12(`R`)-trihydroxy-eicosa-8-`trans`-6,14-`cis`-trienoyl-CoA=NADH+H(''+)+3-oxo-5(`S`),12(`R`)-dihydroxy-eicosa-8-`trans`-6,14-`cis`-trienoyl-CoA'
'm1673'	'5-oxo-12(R)-hydroxy-eicosa-2E,8E,10E,14Z-tetraenoyl-CoA'					'4476'	'arachidonate+superoxide radical=H(''+)+9-peroxy-5`Z`,7`E`,11`Z`,14`Z`-eicosatetraenoate'
'm1674'	'5-oxo-12(R)-hydroxy-eicosa-2E,8E,10E,14Z-tetraenoyl-CoA'					'4477'	'2 L-ascorbate+9,11-cycloperoxy-5-hydroperoxy-6`E`,14`Z`-eicosadienoate=2 dehydroascorbate+H(,2)O+5,9,11-trihydroxyprosta-6`E`,14`Z`-dien-1-oate'
'm1675'	'3,5-dioxo-12(S)-hydroxy-eicosa-8E,10E,14Z-trienoyl-CoA'					'4478'	'L-ascorbate+O(,2)+9-peroxy-5`Z`,7`E`,11`Z`,14`Z`-eicosatetraenoate=9,11-cycloperoxy-5-hydroperoxy-6`E`,14`Z`-eicosadienoate+monodehydroascorbate'
'm1676'	'3,5-dioxo-12(S)-hydroxy-eicosa-8E,10E,14Z-trienoyl-CoA'					'4492'	'NADPH+O(,2)+H(''+)+a-tocotrienol=H(,2)O+NADP(''+)+13''-hydroxy-a-tocotrienol'
'm1677'	'3,5-dioxo-12(S)-hydroxy-eicosa-8E,10E,14Z-trienoyl-CoA'					'4496'	'5-oxo-12(`S`)-hydroxy-eicosa-6`E`,8`Z`,10`E`,14`Z`-tetraenoate=5-oxo-6-`trans`-leukotriene B(,4)'
'm1678'	'3,5-dioxo-12(R)-hydroxy-eicosa-8E,10E,14Z-trienoyl-CoA'					'4497'	'NADP(''+)+5,12-DiHETE=NADPH+H(''+)+5-oxo-12(`S`)-hydroxy-eicosa-6`E`,8`Z`,10`E`,14`Z`-tetraenoate'
'm1679'	'3,5-dioxo-12(R)-hydroxy-eicosa-8E,10E,14Z-trienoyl-CoA'					'4501'	'ATP+2 CoA+2 H(,2)O+NAD(''+)+O(,2)+13''-carboxy-a-tocopherol=AMP+CoA+H(,2)O(,2)+NADH+PP(,i)+propionyl-CoA+2 H(''+)+11''-carboxy-a-chromanol'
'm1680'	'3,5-dioxo-12(R)-hydroxy-eicosa-8E,10E,14Z-trienoyl-CoA'					'4502'	'ATP+2 CoA+2 H(,2)O+NAD(''+)+O(,2)+7''-carboxy-a-chromanol=acetyl-CoA+AMP+CoA+H(,2)O(,2)+NADH+PP(,i)+2 H(''+)+5''-carboxy-a-chromanol'
'm1681'	'(8Z,11Z,14Z,17Z)-eicosatetraenoyl-CoA'					'4503'	'ATP+2 CoA+2 H(,2)O+NAD(''+)+O(,2)+7''-carboxy-a-chromanol=acetyl-CoA+AMP+CoA+H(,2)O(,2)+NADH+PP(,i)+2 H(''+)+5''-carboxy-a-chromanol'
'm1682'	'(8Z,11Z,14Z,17Z)-eicosatetraenoyl-CoA'					'4505'	'5-hydroxyeicosatetraenoate+NADPH+O(,2)+H(''+)=H(,2)O+NADP(''+)+20-hydroxy-5`S`-HETE'
'm1683'	'trans-2-cis,cis,cis-8,11,14-eicosatetraenoyl-CoA'					'4508'	'5-hydroxyeicosatetraenoate+NADP(''+)=NADPH+H(''+)+5-oxo-(6`E`,8`Z`,11`Z`,14`Z`)-eicosatetraenoic acid'
'm1684'	'trans-2-cis,cis,cis-8,11,14-eicosatetraenoyl-CoA'					'4511'	'thromboxane B(,2)=H(,2)+11-dehydrothromboxane B2'
'm1685'	'trans-3-cis-8,11,14-eicosatetraenoyl-CoA'					'4513'	'NADH+H(''+)+11-dehydro-15-keto-TXB(,2)=NAD(''+)+11-dehydro-13,14-dihydro-15-oxo-TXB(,2)'
'm1686'	'3-oxo-dihomo-gama-linolenoyl-CoA'					'4514'	'NAD(''+)+11-dehydrothromboxane B2=NADH+H(''+)+11-dehydro-15-keto-TXB(,2)'
'm1687'	'3-oxo-dihomo-gama-linolenoyl-CoA'					'4516'	'NADH+H(''+)+13,14-dihydro-15-oxo-PGE(,1)=NAD(''+)+13,14-dihydro-PGE(,1)'
'm1688'	'3(S)-hydroxy-all-cis-8,11,14,17-eicosatetraenoyl-CoA'					'4517'	'NAD(''+)+prostaglandin E(,1)=NADH+H(''+)+15-oxo-PGE(,1)'
'm1689'	'3(S)-hydroxy-all-cis-8,11,14,17-eicosatetraenoyl-CoA'					'4518'	'NADH+H(''+)+15-oxo-PGE(,1)=NAD(''+)+13,14-dihydro-15-oxo-PGE(,1)'
'm1690'	'5-oxo-12(S)-hydroxy-eicosa-8E,10E,14Z-trienoyl-CoA'					'4519'	'O(,2)+timnodonate=5-hydroperoxy-EPA'
'm1691'	'5-oxo-12(S)-hydroxy-eicosa-8E,10E,14Z-trienoyl-CoA'					'4521'	'5-hydroperoxy-EPA=H(,2)O+leukotriene A(,5)'
'm1692'	'5-oxo-12(S)-hydroxy-eicosa-8E,10E,14Z-trienoyl-CoA'					'4522'	'O(,2)+timnodonate=15(`S`)-hydroperoxy-EPE'
'm1693'	'5-oxo-12(R)-hydroxy-eicosa-8E,10E,14Z-trienoyl-CoA'					'4525'	'O(,2)+timnodonate=15(`R`)-hydroperoxy-EPE'
'm1694'	'5-oxo-12(R)-hydroxy-eicosa-8E,10E,14Z-trienoyl-CoA'					'4526'	'O(,2)+timnodonate=15(`R`)-hydroperoxy-EPE'
'm1695'	'5-oxo-12(R)-hydroxy-eicosa-8E,10E,14Z-trienoyl-CoA'					'4529'	'reduced acceptor+15(`R`)-hydroperoxy-EPE=acceptor+H(,2)O+15(`R`)-HEPE'
'm1696'	'5-oxo-12(R)-hydroxy-eicosa-8E,10E,14Z-trienoyl-CoA'					'4531'	'H(,2)O+leukotriene A(,5)=leukotriene B(,5)'
'm1697'	'5(S),12(R)-dihydroxy-eicosa-2,8-trans-6,14-cis-tetraenoyl-CoA'					'4533'	'2 H(''+)+5-hydroperoxy-EPA=H(,2)O+5-HEPE'
'm1698'	'5(S),12(R)-dihydroxy-eicosa-2,8-trans-6,14-cis-tetraenoyl-CoA'					'4540'	'2 O(,2)+reduced acceptor+timnodonate=acceptor+H(,2)O+PGH(,3)'
'm1699'	'3(S),12(S)-dihydroxy-5-oxo-eicosa-8E,10E,14Z-trienoyl-CoA'					'4542'	'O(,2)+15(`R`)-HEPE=H(,2)O+5(`S`),6(`S`)-epoxy-15(`R`)-HEPE'
'm1700'	'3(S),12(S)-dihydroxy-5-oxo-eicosa-8E,10E,14Z-trienoyl-CoA'					'4545'	'H(,2)O+5(`S`),6(`S`)-epoxy-15(`R`)-HEPE=15-`epi`-lipoxin B(,5)'
'm1701'	'3(S),12(S)-dihydroxy-5-oxo-eicosa-8E,10E,14Z-trienoyl-CoA'					'4548'	'H(,2)O+5(`S`),6(`S`)-epoxy-15(`R`)-HEPE=15-`epi`-lipoxin A(,5)'
'm1702'	'3(S),12(R)-dihydroxy-5-oxo-eicosa-8E,10E,14Z-trienoyl-CoA'					'4550'	'NADP(''+)+5-HEPE=NADPH+H(''+)+5-oxo-EPE'
'm1703'	'3(S),12(R)-dihydroxy-5-oxo-eicosa-8E,10E,14Z-trienoyl-CoA'					'4556'	'O(,2)+reduced acceptor+timnodonate=acceptor+H(,2)O+18`R`-HEPE'
'm1704'	'3(S),12(R)-dihydroxy-5-oxo-eicosa-8E,10E,14Z-trienoyl-CoA'					'4559'	'O(,2)+reduced acceptor+timnodonate=acceptor+H(,2)O+11`R`-HEPE'
'm1705'	'3-oxo-5(S),12(R)-dihydroxy-eicosa-8-trans-6,14-cis-trienoyl-CoA'					'4562'	'NADPH+O(,2)+H(''+)+leukotriene B(,5)=H(,2)O+NADP(''+)+20-hydroxy-leukotriene B(,5)'
'm1706'	'3-oxo-5(S),12(R)-dihydroxy-eicosa-8-trans-6,14-cis-trienoyl-CoA'					'4572'	'12-hydroxyeicosatetraenoate+O(,2)+2 H(''+)=H(,2)O+5,12-DiHETE'
'm1707'	'3-oxo-5(S),12(R)-dihydroxy-eicosa-8-trans-6,14-cis-trienoyl-CoA'					'4574'	'NADPH+O(,2)+H(''+)+5,12-DiHETE=H(,2)O+NADP(''+)+5,12,20-TriHETE'
'm1708'	'dihomo-gama-linolenoyl-CoA'					'4575'	'3-methylthiopropionate=acrylate+methanethiol'
'm1709'	'trans,cis,cis-2,11,14-eicosatrienoyl-CoA'					'4580'	'H(,2)O+hepoxilin A(,3)=trioxilin A(,3)'
'm1710'	'3(S)-hydroxy-dihomo-gama-linolenoyl-CoA'					'4583'	'12-hydroperoxyeicosatetraenoate=hepoxilin A(,3)'
'm1711'	'3-oxoeicosa-cis,cis-11,14-dienoyl-CoA'					'4586'	'12-hydroperoxyeicosatetraenoate=hepoxilin A(,3) (reversible)'
'm1712'	'10,11-dihydro-LTB4-CoA'					'4592'	'12-hydroxyeicosatetraenoate+NADPH+O(,2)+H(''+)=H(,2)O+NADP(''+)+12,20-DiHETE'
'm1713'	'10,11-dihydro-LTB4-CoA'					'4593'	'prostaglandin D(,2)=H(,2)O+D12-Prostaglandin J(,2)'
'm1714'	'10,11-dihydro-LTB4-CoA'					'4594'	'5-hydroxyeicosatetraenoate+O(,2)+2 H(''+)=H(,2)O+5,12-DiHETE'
'm1715'	'10,11-dihydro-LTB4-CoA'					'4599'	'O(,2)+2 H(''+)+5-oxo-(6`E`,8`Z`,11`Z`,14`Z`)-eicosatetraenoic acid=H(,2)O+5-oxo-12(`S`)-hydroxy-eicosa-6`E`,8`Z`,10`E`,14`Z`-tetraenoate'
'm1716'	'3(S),5(S),12(R)-trihydroxy-eicosa-8-trans-6,14-cis-trienoyl-CoA'					'4604'	'glutathione+9-deoxy-D(''12)-PGD(,2)=S-(9-deoxy-D(''12)-PGD(,2))-glutathione'
'm1717'	'3(S),5(S),12(R)-trihydroxy-eicosa-8-trans-6,14-cis-trienoyl-CoA'					'4605'	'glutathione+9-deoxy-D(''12)-PGD(,2)=S-(9-deoxy-D(''12)-PGD(,2))-glutathione'
'm1718'	'3(S),5(S),12(R)-trihydroxy-eicosa-8-trans-6,14-cis-trienoyl-CoA'					'4608'	'glutathione+prostaglandin J(,2)=S-(PGJ(,2))-glutathione'
'm1719'	'Arachidonyl-CoA'					'4611'	'glutathione+D12-Prostaglandin J(,2)=`S`-(9-deoxy-D(''9,12)-PGD(,2))-glutathione'
'm1720'	'Arachidonyl-CoA'					'4612'	'glutathione+D12-Prostaglandin J(,2)=`S`-(9-deoxy-D(''9,12)-PGD(,2))-glutathione'
'm1721'	'Arachidonyl-CoA'					'4616'	'leukotriene E(,4)+NADPH+O(,2)+H(''+)=H(,2)O+NADP(''+)+20-hydroxy-leukotriene E(,4)'
'm1722'	'Arachidonyl-CoA'					'4617'	'NAD(''+)+20-hydroxy-leukotriene E(,4)=NADH+H(''+)+20-oxo-leukotriene E(,4)'
'm1723'	'cis,cis-11,14-eicosadienoyl-CoA'					'4618'	'H(,2)O+NAD(''+)+20-oxo-leukotriene E(,4)=NADH+2 H(''+)+20-COOH-leukotriene E(,4)'
'm1724'	'trans,cis-2,11-eicosadienoyl-CoA'					'4619'	'NAD(''+)+prostaglandin E(,1)=NADH+prostaglandin E(,2)+H(''+)'
'm1725'	'(3S)-hydroxy-eicosa-cis,cis-11,14-dienoyl-CoA'					'4621'	'glutathione+prostaglandin A(,2)=S-(PGA(,2))-glutathione'
'm1726'	'3-oxo-11-cis-eicosenoyl-CoA'					'4623'	'NADPH+H(''+)+S-(PGA(,2))-glutathione=NADP(''+)+S-(9-hydroxy-PGA(,2))-glutathione'
'm1727'	'trans-eicos-2-enoyl-CoA'					'4625'	'glutathione+prostaglandin A(,1)=S-(PGA(,1))-glutathione'
'm1728'	'11-cis-eicosenoyl-CoA'					'4626'	'glutathione+prostaglandin A(,1)=S-(PGA(,1))-glutathione'
'm1729'	'3-oxoeicosanoyl-CoA'					'4628'	'NADPH+H(''+)+S-(PGA(,1))-glutathione=NADP(''+)+S-(9-hydroxy-PGA(,1))-glutathione'
'm1730'	'3(S)-hydroxy-11-cis-eicosenoyl-CoA'					'4629'	'CoA+18,20-dioxo-20-CoA-leukotriene B(,4)=acetyl-CoA+18-CoA-18-oxo-dinorleukotriene B(,4)'
'm1731'	'3-hydroxyeicosanoyl-CoA'					'4630'	'CoA+18,20-dioxo-20-CoA-leukotriene B(,4)=acetyl-CoA+18-CoA-18-oxo-dinorleukotriene B(,4)'
'm1732'	'3(S)-2-hydroxyphytanoyl-CoA'					'4633'	'H(,2)O+18-CoA-18-oxo-dinorleukotriene B(,4)=CoA+H(''+)+o-carboxy-trinor-leukotriene B(,4)'
'm1733'	'Eicosanoyl-CoA'					'4634'	'O(,2)+20-CoA-20-oxo-leukotriene B(,4)=H(,2)O(,2)+18`E`-20-oxo-20-CoA-LTB(,4)'
'm1734'	'Eicosanoyl-CoA'					'4636'	'ATP+CoA+20-carboxy-leukotriene-B(,4)=AMP+PP(,i)+20-CoA-20-oxo-leukotriene B(,4)'
'm1735'	'Eicosanoyl-CoA'					'4637'	'ATP+CoA+20-carboxy-leukotriene-B(,4)=AMP+PP(,i)+20-CoA-20-oxo-leukotriene B(,4)'
'm1736'	'Phytanoyl-CoA'					'4638'	'ATP+CoA+20-carboxy-leukotriene-B(,4)=AMP+PP(,i)+20-CoA-20-oxo-leukotriene B(,4)'
'm1737'	'Phytanoyl-CoA'					'4639'	'ATP+CoA+20-carboxy-leukotriene-B(,4)=AMP+PP(,i)+20-CoA-20-oxo-leukotriene B(,4)'
'm1738'	'2-Hydroxyphytanoyl-CoA'					'4640'	'H(,2)O+18`E`-20-oxo-20-CoA-LTB(,4)=20-CoA-20-oxo-18`R`-hydroxyleucotriene B(,4)'
'm1739'	'CoA-18-COOH-16E-dinor-LTE5'					'4641'	'H(,2)O+18`E`-20-oxo-20-CoA-LTB(,4)=20-CoA-20-oxo-18`R`-hydroxyleucotriene B(,4) (reversible)'
'm1740'	'CoA-omega-COOH-dinor-LTE4'					'4642'	'NAD(''+)+20-CoA-20-oxo-18`R`-hydroxyleucotriene B(,4)=NADH+H(''+)+18,20-dioxo-20-CoA-leukotriene B(,4)'
'm1741'	'16E-18-oxo-18-CoA-dinor-LTE4'					'4643'	'NAD(''+)+20-CoA-20-oxo-18`R`-hydroxyleucotriene B(,4)=NADH+H(''+)+18,20-dioxo-20-CoA-leukotriene B(,4)'
'm1742'	'CoA-18-COOH-15E-dinor-LTE4'					'4644'	'NAD(''+)+20-CoA-20-oxo-18`R`-hydroxyleucotriene B(,4)=NADH+H(''+)+18,20-dioxo-20-CoA-leukotriene B(,4)'
'm1743'	'16,18-oxo-18-CoA-dinor-LTE4'					'4648'	'prostaglandin E(,1)=H(,2)O+prostaglandin A(,1)'
'm1744'	'16(S)-hydroxy-18-oxo-18-CoA-LTE4'					'4653'	'NADH+H(''+)+CoA-20-COOH-18-oxo-LTE(,4)=NAD(''+)+18(`R`)-hydroxy-20-oxo-20-CoA-LTE(,4)'
'm1745'	'maltoheptaose'					'4654'	'NADH+H(''+)+16,18-oxo-18-CoA-dinor-LTE(,4)=NAD(''+)+16(`S`)-hydroxy-18-oxo-18-CoA-LTE(,4)'
'm1746'	'beta-D-Mannosyldiacetylchitobiosyldiphosphodolichol'					'4655'	'H(,2)O+CoA-o-COOH-dinor-LTE(,4)=CoA+H(''+)+18-carboxy-dinor-LTE(,4)'
'm1747'	'2-trans-7,10,13,16,19-all-cis-docosahexaenoyl-CoA'					'4656'	'CoA+CoA-20-COOH-18-oxo-LTE(,4)=acetyl-CoA+CoA-o-COOH-dinor-LTE(,4)'
'm1748'	'2-trans-7,10,13,16,19-all-cis-docosahexaenoyl-CoA'					'4657'	'O(,2)+CoA-20-COOH-LTE(,4)=H(,2)O(,2)+18`E`-20-oxo-20-CoA-LTE(,4)'
'm1749'	'docosa-4,7,10,13,16,19-all-cis-hexaenoyl-CoA'					'4658'	'ATP+CoA+20-COOH-leukotriene E(,4)=AMP+PP(,i)+CoA-20-COOH-LTE(,4)'
'm1750'	'docosa-4,7,10,13,16,19-all-cis-hexaenoyl-CoA'					'4659'	'H(,2)O+18`E`-20-oxo-20-CoA-LTE(,4)=18(`R`)-hydroxy-20-oxo-20-CoA-LTE(,4)'
'm1751'	'docosa-4,7,10,13,16,19-all-cis-hexaenoyl-CoA'					'4660'	'H(,2)O+CoA-o-COOH-tetranor-LTE(,3)=CoA+H(''+)+o-COOH-tetranor-LTE(,3)'
'm1752'	'3-oxo-docosa-7,10,13,16,19-all-cis-pentaenoyl-CoA'					'4661'	'O(,2)+CoA-o-COOH-dinor-LTE(,4)=H(,2)O(,2)+CoA-18-COOH-16`E`-dinor-LTE(,5)'
'm1753'	'3-oxo-docosa-7,10,13,16,19-all-cis-pentaenoyl-CoA'					'4662'	'NADPH+H(''+)+CoA-18-COOH-16`E`-dinor-LTE(,5)=NADP(''+)+CoA-18-COOH-15`E`-dinor-LTE(,4)'
'm1754'	'docosa-7,10,13,16,19-all-cis-pentaenoyl-CoA'					'4663'	'CoA-18-COOH-15`E`-dinor-LTE(,4)=16`E`-18-oxo-18-CoA-dinor-LTE(,4)'
'm1755'	'docosa-7,10,13,16,19-all-cis-pentaenoyl-CoA'					'4664'	'H(,2)O+16`E`-18-oxo-18-CoA-dinor-LTE(,4)=16(`S`)-hydroxy-18-oxo-18-CoA-LTE(,4)'
'm1756'	'adrenoyl-CoA'					'4665'	'CoA+16,18-oxo-18-CoA-dinor-LTE(,4)=acetyl-CoA+CoA-o-COOH-tetranor-LTE(,3)'
'm1757'	'adrenoyl-CoA'					'4666'	'O(,2)+CoA-o-COOH-tetranor-LTE(,3)=H(,2)O(,2)+13`E`-tetranor-16-oxo-16-CoA-LTE(,4)'
'm1758'	'adrenoyl-CoA'					'4667'	'H(,2)O+13`E`-tetranor-16-oxo-16-CoA-LTE(,4)=CoA+H(''+)+13`E`-tetranor-16-carboxy-LTE(,4)'
'm1759'	'2E,7Z,10Z,13Z,16Z-docosapentaenoyl-CoA'					'4671'	'reduced acceptor+prostaglandin G(,1)=acceptor+H(,2)O+prostaglandin H(,1)'
'm1760'	'trans,cis,cis,cis,cis-2,10,13,16,19-docosapentaenoyl-CoA'					'4672'	'dolichol+NADP(''+)=NADPH+H(''+)+dehydrodolichol (reversible)'
'm1761'	'trans,cis,cis,cis,cis-2,10,13,16,19-docosapentaenoyl-CoA'					'4674'	'H(,2)O+dehydrodolichyl diphosphate=Pi+dehydrodolichyl-P'
'm1762'	'3(S)-hydroxy-docosa-7,10,13,16,19-all-cis-pentaenoyl-CoA'					'4675'	'H(,2)O+dehydrodolichyl-P=Pi+dehydrodolichol'
'm1763'	'3(S)-hydroxy-docosa-7,10,13,16,19-all-cis-pentaenoyl-CoA'					'4676'	'NADPH+H(''+)+12-oxo-20-carboxy-leukotriene B(,4)=NADP(''+)+12-oxo-10,11-dihydro-20-COOH-LTB(,4)'
'm1764'	'3-oxo-docosa-7,10,13,16-all-cis-tetraenoyl-CoA'					'4679'	'NADPH+H(''+)+20-carboxy-leukotriene-B(,4)=NADP(''+)+20-COOH-10,11-dihydro-LTB(,4)'
'm1765'	'3-oxo-docosa-10,13,16,19-all-cis-tetraenoyl-CoA'					'4683'	'O(,2)+`cis`-6-dodecenoyl-CoA=H(,2)O(,2)+`trans`,`cis`-dodeca-2,6-dienoyl-CoA'
'm1766'	'3-oxo-docosa-10,13,16,19-all-cis-tetraenoyl-CoA'					'4684'	'O(,2)+`cis`-6-dodecenoyl-CoA=H(,2)O(,2)+`trans`,`cis`-dodeca-2,6-dienoyl-CoA'
'm1767'	'trans,cis,cis,cis-2,10,13,16-docosatetraenoyl-CoA'					'4686'	'O(,2)+`cis`-deca-4-enoyl-CoA=H(,2)O(,2)+`trans`,`cis`-deca-2,4-dienoyl-CoA'
'm1768'	'all-cis-10,13,16,19-docosatetraenoyl-CoA'					'4687'	'NADPH+H(''+)+`trans`,`cis`-deca-2,4-dienoyl-CoA=NADP(''+)+`trans`-3-decenoyl-CoA'
'm1769'	'all-cis-10,13,16,19-docosatetraenoyl-CoA'					'4688'	'NADPH+H(''+)+`trans`,`cis`-deca-2,4-dienoyl-CoA=NADP(''+)+`trans`-3-decenoyl-CoA'
'm1770'	'3(S)-hydroxy-docosa-7,10,13,16-all-cis-tetraenoyl-CoA'					'4689'	'NADPH+H(''+)+`trans`,`cis`-deca-2,4-dienoyl-CoA=NADP(''+)+`trans`-3-decenoyl-CoA'
'm1771'	'3-oxo-docosa-cis,cis,cis-10,13,16-trienoyl-CoA'					'4690'	'`trans`-deca-2-enoyl-CoA=`trans`-3-decenoyl-CoA'
'm1772'	'3(S)-hydroxy-docosa-10,13,16,19-all-cis-tetraenoyl-CoA'					'4701'	'12-hydroxyeicosatetraenoate+O(,2)+2 H(''+)=H(,2)O+11,12-dihydroxy-5(`E`),7(`E`),9(`E`),14(`Z`)-eicosatetraenoate'
'm1773'	'3(S)-hydroxy-docosa-10,13,16,19-all-cis-tetraenoyl-CoA'					'4702'	'12-hydroxyeicosatetraenoate+NADH+H(''+)=NAD(''+)+12-HETrE'
'm1774'	'3(S)-hydroxy-10,13,16-all-cis-docosatrienoyl-CoA'					'4704'	'arachidonate+NADPH+O(,2)+H(''+)=H(,2)O+NADP(''+)+8-hydroxyeicosatetraenoate'
'm1775'	'trans,cis-2,13-docosadienoyl-CoA'					'4706'	'arachidonate+NADPH+O(,2)+H(''+)=H(,2)O+NADP(''+)+11-hydroxyeicosatetraenoate'
'm1776'	'3-oxo-13cis-docosenoyl-CoA'					'4708'	'arachidonate+NADPH+O(,2)+H(''+)=H(,2)O+NADP(''+)+9-HETE'
'm1777'	'trans-docos-2-enoyl-CoA'					'4710'	'arachidonate+NADPH+O(,2)+H(''+)=H(,2)O+NADP(''+)+13-HETE'
'm1778'	'trans-docos-2-enoyl-CoA'					'4712'	'arachidonate+NADPH+O(,2)+H(''+)=H(,2)O+NADP(''+)+7-HETE'
'm1779'	'cis-13-docosenoyl-CoA'					'4714'	'arachidonate+NADPH+O(,2)+H(''+)=H(,2)O+NADP(''+)+10-HETE'
'm1780'	'3-oxodocosanoyl-CoA'					'4716'	'arachidonate+NADPH+O(,2)+H(''+)=H(,2)O+NADP(''+)+18-HETE'
'm1781'	'3-oxodocosanoyl-CoA'					'4718'	'arachidonate+NADPH+O(,2)+H(''+)=H(,2)O+NADP(''+)+17-HETE'
'm1782'	'3(S)-hydroxy-13cis-docosenoyl-CoA'					'4739'	'L-epinephrine=adrenochrome'
'm1783'	'docosanoyl-CoA'					'4751'	'Benzo[a]pyrene-2,3-oxide+H2O=Benzo[a]pyrene-2,3-diol'
'm1784'	'3-hydroxydocosanoyl-CoA'					'4752'	'Benzo[a]pyrene-2,3-oxide+H2O=Benzo[a]pyrene-2,3-diol'
'm1785'	'18E-20-oxo-20-CoA-LTE4'					'4753'	'Benzo[a]pyrene-2,3-oxide+H2O=Benzo[a]pyrene-2,3-diol'
'm1786'	'CoA-20-COOH-18-oxo-LTE4'					'4754'	'Benzo[a]pyrene-4,5-oxide+H2O=Benzo[a]pyrene-4,5-diol'
'm1787'	'CoA-20-COOH-LTE4'					'4755'	'Benzo[a]pyrene-4,5-oxide+H2O=Benzo[a]pyrene-4,5-diol'
'm1788'	'18(R)-hydroxy-20-oxo-20-CoA-LTE4'					'4756'	'Benzo[a]pyrene-4,5-oxide+H2O=Benzo[a]pyrene-4,5-diol'
'm1789'	'Bilirubin beta-diglucuronide'					'4757'	'Benzo[a]pyrene-9,10-oxide+H2O=Benzo[a]pyrene-9,10-diol'
'm1790'	'Bilirubin beta-diglucuronide'					'4758'	'Benzo[a]pyrene-9,10-oxide+H2O=Benzo[a]pyrene-9,10-diol'
'm1791'	'trans-2-all-cis-6,9,12,15,18,21-tetracosaheptaenoyl-CoA'					'4759'	'Benzo[a]pyrene-9,10-oxide+H2O=Benzo[a]pyrene-9,10-diol'
'm1792'	'3-oxo-all-cis-6,9,12,15,18,21-tetracosahexaenoyl-CoA'					'4768'	'7,12-Dimethylbenz[a]anthracene-3,4-oxide+H2O=7,12-Dimethylbenz[a]anthracene-3,4-diol'
'm1793'	'2-trans-9,12,15,18,21-all-cis-tetracosahexaenoyl-CoA'					'4770'	'7,12-Dimethylbenz[a]anthracene-3,4-oxide+H2O=7,12-Dimethylbenz[a]anthracene-3,4-diol'
'm1794'	'2-trans-9,12,15,18,21-all-cis-tetracosahexaenoyl-CoA'					'4775'	'Dibenzo[a,l]pyrene-11,12-epoxide+H2O=Dibenzo[a,l]pyrene-11,12-diol'
'm1795'	'tetracosa-6,9,12,15,18,21-all-cis-hexaenoyl-CoA'					'4777'	'Dibenzo[a,l]pyrene-11,12-epoxide+H2O=Dibenzo[a,l]pyrene-11,12-diol'
'm1796'	'tetracosa-6,9,12,15,18,21-all-cis-hexaenoyl-CoA'					'4781'	'Hexadecanoic acid+ATP+CoA=Palmitoyl-CoA+AMP+PPi (reversible)'
'm1797'	'tetracosa-6,9,12,15,18,21-all-cis-hexaenoyl-CoA'					'4784'	'ATP[C]=ATP[G]'
'm1798'	'trans-2-all-cis-6,9,12,15,18-tetracosahexaenoyl-CoA'					'4786'	'NAD+[C]=NAD+[X]'
'm1799'	'3-oxo-all-cis-6,9,12,15,18-tetracosapentaenoyl-CoA'					'4787'	'NADP+[C]+H+[C]=NADP+[M]+H+[M]'
'm1800'	'3-oxo-all-cis-6,9,12,15,18-tetracosapentaenoyl-CoA'					'4799'	'S-Adenosyl-L-methionine[C]=S-Adenosyl-L-methionine[N]'
'm1801'	'3-oxo-all-cis-6,9,12,15,18-tetracosapentaenoyl-CoA'					'4801'	'AMP[C]+H+[C]=AMP[M]+H+[M]'
'm1802'	'(3S)-hydroxy-tetracosa-6,9,12,15,18,21-all-cis-hexaenoyl-CoA'					'4802'	'H+[C]+Pyruvate[C]=H+[X]+Pyruvate[X]'
'm1803'	'tetracosa-9,12,15,18,21-all-cis-pentaenoyl-CoA'					'4811'	'D-Glucose[C]=D-Glucose[G]'
'm1804'	'tetracosa-9,12,15,18,21-all-cis-pentaenoyl-CoA'					'4816'	'GDP[C]=GDP[R]'
'm1805'	'2-trans-9,12,15,18-all-cis-tetracosapentaenoyl-CoA'					'4817'	'GDP[C]+H+[C]=GDP[G]+H+[G]'
'm1806'	'2-trans-9,12,15,18-all-cis-tetracosapentaenoyl-CoA'					'4818'	'Oxaloacetate[C]+H+[C]=Oxaloacetate[M]+H+[M]'
'm1807'	'tetracosa-6,9,12,15,18-all-cis-pentaenoyl-CoA'					'4825'	'L-Alanine[C]+H+[C]=L-Alanine[M]+H+[M]'
'm1808'	'tetracosa-6,9,12,15,18-all-cis-pentaenoyl-CoA'					'4828'	'UDP-N-acetyl-D-glucosamine[C]=UDP-N-acetyl-D-glucosamine[E] (reversible)'
'm1809'	'trans,cis,cis,cis,cis-2,12,15,18,21-tetracosapentaenoyl-CoA'					'4829'	'UDP-N-acetyl-D-glucosamine[C]+H+[C]=UDP-N-acetyl-D-glucosamine[R]+H+[R]'
'm1810'	'3(S)-hydroxy-tetracosa-9,12,15,18,21-all-cis-pentaenoyl-CoA'					'4830'	'UDP-N-acetyl-D-glucosamine[C]+UMP[G]=UDP-N-acetyl-D-glucosamine[G]+UMP[C]'
'm1811'	'3(S)-hydroxy-tetracosa-9,12,15,18,21-all-cis-pentaenoyl-CoA'					'4834'	'H+[M]+L-Lysine[C]=H+[C]+L-Lysine[M]'
'm1812'	'3(S)-hydroxy-tetracosa-6,9,12,15,18-all-cis-pentaenoyl-CoA'					'4841'	'UDP-D-galactose[C]+UMP[G]=UDP-D-galactose[G]+UMP[C]'
'm1813'	'3-oxo-tetracosa-12,15,18,21-all-cis-tetraenoyl-CoA'					'4842'	'CMP[C]=CMP[N]'
'm1814'	'3-oxo-tetracosa-12,15,18,21-all-cis-tetraenoyl-CoA'					'4843'	'CMP[C]+H+[C]=CMP[M]+H+[M]'
'm1815'	'tetracosa-9,12,15,18-all-cis-tetraenoyl-CoA'					'4844'	'CMP[G]+CMP-N-acetylneuraminate[C]=CMP[C]+CMP-N-acetylneuraminate[G]'
'm1816'	'tetracosa-9,12,15,18-all-cis-tetraenoyl-CoA'					'4845'	'Formate[C]+H+[C]=Formate[M]+H+[M]'
'm1817'	'3(S)-hydroxy-tetracosa-12,15,18,21-all-cis-tetraenoyl-CoA'					'4850'	'Carboxylate[L]=Carboxylate[C] (reversible)'
'm1818'	'3(S)-hydroxy-tetracosa-12,15,18,21-all-cis-tetraenoyl-CoA'					'4852'	'L-Arginine[C]=L-Arginine[E] (reversible)'
'm1819'	'trans,cis-2,15-tetracosadienoyl-CoA'					'4857'	'CTP[C]=CTP[R]'
'm1820'	'3-oxo-cis-15-tetracosaenoyl-CoA'					'4858'	'CTP[C]=CTP[G]'
'm1821'	'Chenodeoxycholoyl-CoA'					'4861'	'L-Serine[C]=L-Serine[R]'
'm1822'	'Chenodeoxycholoyl-CoA'					'4862'	'L-Serine[C]=L-Serine[G]'
'm1823'	'Chenodeoxycholoyl-CoA'					'4863'	'L-Serine[C]=L-Serine[X]'
'm1824'	'Chenodeoxyglycocholoyl-CoA'					'4867'	'L-Methionine[C]+H+[C]=L-Methionine[M]+H+[M]'
'm1825'	'Choloyl-CoA'					'4868'	'Phosphoenolpyruvate[C]=Phosphoenolpyruvate[N]'
'm1826'	'Choloyl-CoA'					'4870'	'UTP[C]=UTP[R]'
'm1827'	'Choloyl-CoA'					'4871'	'UTP[C]=UTP[G]'
'm1828'	'trans-tetracos-2-enoyl-CoA'					'4872'	'L-Tryptophan[C]+H+[C]=L-Tryptophan[M]+H+[M]'
'm1829'	'cis-15-tetracosenoyl-CoA'					'4873'	'Na+[E]+L-Phenylalanine[E]=Na+[C]+L-Phenylalanine[C]'
'm1830'	'3-oxotetracosanoyl-CoA'					'4879'	'L-Tyrosine[C]=L-Tyrosine[G]'
'm1831'	'3-oxotetracosanoyl-CoA'					'4880'	'L-Tyrosine[C]+H+[C]=L-Tyrosine[X]+H+[X]'
'm1832'	'3(S)-hydroxy-cis-15-tetracosaenoyl-CoA'					'4884'	'Malonyl-CoA[C]=Malonyl-CoA[N]'
'm1833'	'all-trans-Nonaprenyl diphosphate'					'4885'	'Malonyl-CoA[C]=Malonyl-CoA[R]'
'm1834'	'tetracosanoyl-CoA'					'4886'	'Malonyl-CoA[C]=Malonyl-CoA[L]'
'm1835'	'tetracosanoyl-CoA'					'4887'	'Malonyl-CoA[C]+H+[C]=Malonyl-CoA[M]+H+[M]'
'm1836'	'3-hydroxytetracosanoyl-CoA'					'4890'	'L-Cysteine[C]+H+[C]=L-Cysteine[M]+H+[M]'
'm1837'	'Globoside'					'4898'	'UMP[C]=UMP[N]'
'm1838'	'1,3-beta-D-Galactosyl-N-acetyl-D-glucosaminyl-1,3-beta-D-galactosyl- 1,4-D-glucosylceramide'					'4905'	'Choline[C]=Choline[M]'
'm1839'	'1,3-beta-D-Galactosyl-N-acetyl-D-glucosaminyl-1,3-beta-D-galactosyl- 1,4-D-glucosylceramide'					'4909'	'Glycerol[C]=Glycerol[L]'
'm1840'	'1,3-beta-D-Galactosyl-N-acetyl-D-glucosaminyl-1,3-beta-D-galactosyl- 1,4-D-glucosylceramide'					'4910'	'Glycerol[C]+H+[C]=Glycerol[M]+H+[M]'
'm1841'	'beta-D-Galactosyl-1,4-N-acetyl-beta-D-glucosaminyl-1,3-beta-D- galactosyl-1,4-beta-D-glucosylceramide'					'4921'	'N-Acetyl-D-glucosamine[C]=N-Acetyl-D-glucosamine[E] (reversible)'
'm1842'	'beta-D-Galactosyl-1,4-N-acetyl-beta-D-glucosaminyl-1,3-beta-D- galactosyl-1,4-beta-D-glucosylceramide'					'4922'	'N-Acetyl-D-glucosamine[C]=N-Acetyl-D-glucosamine[G]'
'm1843'	'GA1'					'4929'	'Palmitoyl-CoA[C]=Palmitoyl-CoA[R]'
'm1844'	'GA1'					'4930'	'Palmitoyl-CoA[C]=Palmitoyl-CoA[L]'
'm1845'	'24-oxo-25(R)-trihydroxycoprostanoyl-CoA'					'4932'	'ATP[C]+H2O[C]+Phosphatidylcholine[C]=ADP[C]+H+[C]+Phosphatidylcholine[E]+Orthophosphate[C] (reversible)'
'm1846'	'24-oxo-25(R)-trihydroxycoprostanoyl-CoA'					'4933'	'Phosphatidylcholine[C]=Phosphatidylcholine[R]'
'm1847'	'24(R),25(R)-varanoyl-CoA'					'4934'	'ADP[C]+H+[C]+Phosphatidylcholine[C]+Orthophosphate[C]=ATP[C]+H2O[C]+Phosphatidylcholine[M]'
'm1848'	'24(R),25(R)-varanoyl-CoA'					'4935'	'D-Mannose[E]=D-Mannose[C]'
'm1849'	'24(R),25(R)-varanoyl-CoA'					'4950'	'Cholesterol[C]=Cholesterol[L]'
'm1850'	'3alpha,7alpha-Dihydroxy-5beta-24-oxocholestanoyl-CoA'					'4951'	'Cholesterol[C]=Cholesterol[M]'
'm1851'	'3alpha,7alpha,12alpha-Trihydroxy-5beta-cholest-24-enoyl-CoA'					'4954'	'N-Acylsphingosine[C]+H+[C]=N-Acylsphingosine[M]+H+[M]'
'm1852'	'3alpha,7alpha,12alpha-Trihydroxy-5beta-cholest-24-enoyl-CoA'					'4956'	'Sarcosine[C]=Sarcosine[X]'
'm1853'	'3alpha,7alpha,12alpha-Trihydroxy-5beta-24-oxocholestanoyl-CoA'					'4960'	'Arachidonate[C]=Arachidonate[R]'
'm1854'	'3alpha,7alpha-Dihydroxy-5beta-cholestanoyl-CoA'					'4968'	'Dimethylallyl diphosphate[C]=Dimethylallyl diphosphate[X]'
'm1855'	'3alpha,7alpha-Dihydroxy-5beta-cholestanoyl-CoA'					'4969'	'dCMP[C]=dCMP[R]'
'm1856'	'3alpha,7alpha-Dihydroxy-5beta-cholestanoyl-CoA'					'4971'	'Lipoamide[C]+H+[C]=Lipoamide[M]+H+[M]'
'm1857'	'3alpha,7alpha,12alpha-Trihydroxy-5beta-cholestanoyl-CoA'					'4973'	'Riboflavin[E]=Riboflavin[C]'
'm1858'	'3alpha,7alpha,12alpha-Trihydroxy-5beta-cholestanoyl-CoA'					'4978'	'alpha-D-Glucose[C]=alpha-D-Glucose[R]'
'm1859'	'3alpha,7alpha,12alpha-Trihydroxy-5beta-cholestanoyl-CoA'					'4991'	'Isocitrate[C]=Isocitrate[X]'
'm1860'	'3alpha,7alpha,12alpha,24-Tetrahydroxy-5beta-cholestanoyl-CoA'					'5001'	'(S)-Dihydroorotate[C]+H+[C]=(S)-Dihydroorotate[M]+H+[M]'
'm1861'	'alpha-D-Mannosyl-beta-D-mannosyl- diacetylchitobiosyldiphosphodolichol'					'5008'	'6-Phospho-D-gluconate[C]=6-Phospho-D-gluconate[R] (reversible)'
'm1862'	'Heme O'					'5010'	'Phosphatidylethanolamine[C]=Phosphatidylethanolamine[N]'
'm1863'	'Diethylthiophosphoric acid'					'5011'	'Phosphatidylethanolamine[C]=Phosphatidylethanolamine[R]'
'm1864'	'Diethylphosphoric acid'					'5016'	'(S)-3-Hydroxy-3-methylglutaryl-CoA[C]=(S)-3-Hydroxy-3-methylglutaryl-CoA[M]'
'm1865'	'Putrescine'					'5018'	'dAMP[C]=dAMP[R]'
'm1866'	'Putrescine'					'5020'	'dGMP[C]=dGMP[R]'
'm1867'	'Putrescine'					'5028'	'L-Pipecolate[C]=L-Pipecolate[X]'
'm1868'	'alloxan'					'5030'	'Stearoyl-CoA[C]=Stearoyl-CoA[R]'
'm1869'	'Uracil'					'5031'	'Stearoyl-CoA[C]=Stearoyl-CoA[X]'
'm1870'	'Uracil'					'5032'	'Stearoyl-CoA[C]+H+[C]=Stearoyl-CoA[M]+H+[M]'
'm1871'	'Uracil'					'5036'	'Phosphatidate[C]=Phosphatidate[G]'
'm1872'	'Fumarate'					'5039'	'Triacylglycerol[C]=Triacylglycerol[R]'
'm1873'	'Fumarate'					'5040'	'Prostaglandin H2[C]+H+[C]=Prostaglandin H2[M]+H+[M]'
'm1874'	'Oxaloacetate'					'5041'	'5-Aminolevulinate[M]=5-Aminolevulinate[C]'
'm1875'	'Oxaloacetate'					'5044'	'trans,trans-Farnesyl diphosphate[C]=trans,trans-Farnesyl diphosphate[R]'
'm1876'	'[Pyruvate dehydrogenase (acetyl-transferring)]'					'5049'	'dTTP[C]=dTTP[R]'
'm1877'	'Protein serine'					'5050'	'dTTP[C]=dTTP[G]'
'm1878'	'Protein serine'					'5054'	'Tyramine[C]=Tyramine[R]'
'm1879'	'Protein serine'					'5055'	'Tyramine[C]+H+[C]=Tyramine[M]+H+[M]'
'm1880'	'2-Oxobutanoate'					'5061'	'Androsterone[C]=Androsterone[L]'
'm1881'	'Acetoacetate'					'5067'	'L-Noradrenaline[C]+H+[C]=L-Noradrenaline[M]+H+[M]'
'm1882'	'Succinate semialdehyde'					'5069'	'Sphingomyelin[C]=Sphingomyelin[L]'
'm1883'	'Succinate semialdehyde'					'5074'	'D-Glyceraldehyde[C]=D-Glyceraldehyde[R]'
'm1884'	'2-Methyl-3-oxopropanoate'					'5075'	'D-Glyceraldehyde[C]+H+[C]=D-Glyceraldehyde[M]+H+[M]'
'm1885'	'(S)-Methylmalonate semialdehyde'					'5078'	'Prostaglandin E2[C]=Prostaglandin E2[G] (reversible)'
'm1886'	'(S)-Methylmalonate semialdehyde'					'5083'	'3-Sulfino-L-alanine[C]+L-Aspartate[M]=3-Sulfino-L-alanine[M]+L-Aspartate[C]'
'm1887'	'Succinate'					'5090'	'5-Formiminotetrahydrofolate[C]=5-Formiminotetrahydrofolate[G]'
'm1888'	'Succinate'					'5094'	'3alpha,7alpha,12alpha-Trihydroxy-5beta-cholanate[C]=3alpha,7alpha,12alpha-Trihydroxy-5beta-cholanate[R]'
'm1889'	'Succinate'					'5097'	'(5Z,13E)-(15S)-9alpha,15-Dihydroxy-11-oxoprosta-5,13-dienoate[C]=(5Z,13E)-(15S)-9alpha,15-Dihydroxy-11-oxoprosta-5,13-dienoate[G]'
'm1890'	'Methylmalonate'					'5100'	'3-(2-Aminoethyl)-1H-indol-5-ol[C]+H+[C]=3-(2-Aminoethyl)-1H-indol-5-ol[M]+H+[M]'
'm1891'	'Methylmalonate'					'5101'	'L-Adrenaline[C]+H+[C]=L-Adrenaline[M]+H+[M]'
'm1892'	'(S)-Malate'					'5102'	'D-Sorbitol[E]=D-Sorbitol[C]'
'm1893'	'(S)-Malate'					'5108'	'Naphthalene[C]=Naphthalene[R]'
'm1894'	'(R)-Malate'					'5114'	'Pantothenate[C]+H+[C]=Pantothenate[M]+H+[M]'
'm1895'	'Acylglycerone phosphate'					'5120'	'Estradiol-17beta[R]=Estradiol-17beta[C] (reversible)'
'm1896'	'[Pyruvate dehydrogenase (acetyl-transferring)] phosphate'					'5124'	'N,N-Dimethylglycine[C]=N,N-Dimethylglycine[M]'
'm1897'	'L-2-Amino-3-oxobutanoic acid'					'5126'	'(S)-2,3-Epoxysqualene[C]=(S)-2,3-Epoxysqualene[R]'
'm1898'	'L-Aspartate'					'5134'	'Cholesta-5,7-dien-3beta-ol[C]=Cholesta-5,7-dien-3beta-ol[N]'
'm1899'	'L-Aspartate'					'5143'	'Nicotinate D-ribonucleotide[E]=Nicotinate D-ribonucleotide[C]'
'm1900'	'1-Acylglycerol'					'5144'	'Nicotinate D-ribonucleotide[C]=Nicotinate D-ribonucleotide[R]'
'm1901'	'1-Acylglycerol'					'5147'	'1-Phosphatidyl-D-myo-inositol[C]+H+[C]=1-Phosphatidyl-D-myo-inositol[M]+H+[M]'
'm1902'	'2-Acylglycerol'					'5150'	'3beta-Hydroxyandrost-5-en-17-one[C]=3beta-Hydroxyandrost-5-en-17-one[L]'
'm1903'	'2-Acylglycerol'					'5155'	'D-Glucono-1,5-lactone 6-phosphate[C]=D-Glucono-1,5-lactone 6-phosphate[R]'
'm1904'	'2-Acyl-1-alkyl-sn-glycero-3-phosphate'					'5157'	'D-myo-Inositol 1,4,5-trisphosphate[C]=D-myo-Inositol 1,4,5-trisphosphate[G]'
'm1905'	'L-Asparagine'					'5160'	'1D-myo-Inositol 1,3,4,5-tetrakisphosphate[C]=1D-myo-Inositol 1,3,4,5-tetrakisphosphate[R]'
'm1906'	'L-Asparagine'					'5162'	'1D-myo-Inositol 1,3,4,5,6-pentakisphosphate[C]=1D-myo-Inositol 1,3,4,5,6-pentakisphosphate[N]'
'm1907'	'L-Asparagine'					'5163'	'beta-D-Galactosyl-1,4-beta-D-glucosylceramide[C]=beta-D-Galactosyl-1,4-beta-D-glucosylceramide[E] (reversible)'
'm1908'	'Allantoate'					'5168'	'Prostaglandin I2[C]=Prostaglandin I2[R]'
'm1909'	'3-(Methylthio)propionic acid'					'5171'	'Linoleate[C]=Linoleate[X]'
'm1910'	'(R)-3-Hydroxybutanoate'					'5172'	'Linoleate[C]+H+[C]=Linoleate[M]+H+[M]'
'm1911'	'3-Hydroxy-2-methylpropanoate'					'5176'	'Psychosine[C]=Psychosine[G]'
'm1912'	'(S)-3-Hydroxyisobutyrate'					'5177'	'Psychosine[C]=Psychosine[L] (reversible)'
'm1913'	'1-Acyl-sn-glycerol 3-phosphate'					'5182'	'Choloyl-CoA[C]=Choloyl-CoA[X]'
'm1914'	'1-Acyl-sn-glycerol 3-phosphate'					'5184'	'Choloyl-CoA[R]=Choloyl-CoA[C]'
'm1915'	'1-Acyl-sn-glycerol 3-phosphate'					'5190'	'Pregnenolone[C]=Pregnenolone[G]'
'm1916'	'4-Aminobutyraldehyde'					'5191'	'Pregnenolone[C]=Pregnenolone[L]'
'm1917'	'4-Aminobutyraldehyde'					'5194'	'Acetylcholine[C]=Acetylcholine[G]'
'm1918'	'4-Aminobutanoate'					'5196'	'Eicosanoyl-CoA[C]=Eicosanoyl-CoA[X]'
'm1919'	'4-Aminobutanoate'					'5198'	'Linoleoyl-CoA[C]=Linoleoyl-CoA[R]'
'm1920'	'N,N-Dimethylglycine'					'5199'	'Linoleoyl-CoA[C]=Linoleoyl-CoA[X] (reversible)'
'm1921'	'N,N-Dimethylglycine'					'5202'	'Phytanoyl-CoA[C]=Phytanoyl-CoA[X]'
'm1922'	'L-3-Amino-isobutanoate'					'5207'	'Protein serine[C]=Protein serine[E] (reversible)'
'm1923'	'L-Homocysteine'					'5208'	'Protein serine[C]=Protein serine[G]'
'm1924'	'L-Threonine'					'5209'	'Arachidonyl-CoA[C]=Arachidonyl-CoA[X]'
'm1925'	'L-Threonine'					'5210'	'Arachidonyl-CoA[C]+H+[C]=Arachidonyl-CoA[M]+H+[M]'
'm1926'	'D-Erythrose 4-phosphate'					'5212'	'L-Cystathionine[C]+H+[C]=L-Cystathionine[M]+H+[M]'
'm1927'	'kinetensin 1-8'					'5216'	'Xanthurenic acid[C]+H+[C]=Xanthurenic acid[M]+H+[M]'
'm1928'	'di-trans,poly-cis-Decaprenyl diphosphate'					'5217'	'alpha-Tocopherol[C]=alpha-Tocopherol[R]'
'm1929'	'N-Acetyl-D-galactosaminyl-(N-acetylneuraminyl)-D-galactosyl-D- glucosylceramide'					'5221'	'Chenodeoxycholate[C]+H+[C]=Chenodeoxycholate[M]+H+[M]'
'm1930'	'N-Acetyl-D-galactosaminyl-(N-acetylneuraminyl)-D-galactosyl-D- glucosylceramide'					'5223'	'Estrone 3-sulfate[C]=Estrone 3-sulfate[R]'
'm1931'	'N-Acetyl-D-galactosaminyl-(N-acetylneuraminyl)-D-galactosyl-D- glucosylceramide'					'5224'	'Estrone 3-sulfate[C]=Estrone 3-sulfate[G]'
'm1932'	'Fuc-alpha1-_LT_2Gal-beta1-_LT_3GlcNAc-beta1-_LT_3Gal-beta1-_LT_4Glc-beta1-1''Cer'					'5225'	'Estrone 3-sulfate[C]=Estrone 3-sulfate[L]'
'm1933'	'Fuc-alpha1-_LT_2Gal-beta1-_LT_3GlcNAc-beta1-_LT_3Gal-beta1-_LT_4Glc-beta1-1''Cer'					'5230'	'3-Dehydrosphinganine[C]=3-Dehydrosphinganine[E] (reversible)'
'm1934'	'Fuc-alpha1-_LT_2Gal-beta1-_LT_3GlcNAc-beta1-_LT_3Gal-beta1-_LT_4Glc-beta1-1''Cer'					'5231'	'3-cis-Dodecenoyl-CoA[C]+H+[C]=3-cis-Dodecenoyl-CoA[M]+H+[M]'
'm1935'	'N-Acetyl-D-galactosaminyl-N-Acetyl-D-galactosaminyl-1,3-D- galactosyl-1,4-D-galactosyl-1,4-D-glucosylceramide'					'5232'	'3-cis-Dodecenoyl-CoA[C]=3-cis-Dodecenoyl-CoA[X] (reversible)'
'm1936'	'maltononaose'					'5233'	'Ceramide 1-phosphate[C]=Ceramide 1-phosphate[R]'
'm1937'	'kinetensin'					'5234'	'Ceramide 1-phosphate[C]=Ceramide 1-phosphate[G]'
'm1938'	'D-Galactosyl-N-acetyl-D-galactosaminyl-(N-acetylneuraminyl)-D- galactosyl-D-glucosylceramide'					'5236'	'11-Deoxycorticosterone[C]+H+[C]=11-Deoxycorticosterone[M]+H+[M]'
'm1939'	'D-Galactosyl-N-acetyl-D-galactosaminyl-(N-acetylneuraminyl)-D- galactosyl-D-glucosylceramide'					'5237'	'Coproporphyrinogen III[C]+H+[C]=Coproporphyrinogen III[M]+H+[M]'
'm1940'	'D-Galactosyl-N-acetyl-D-galactosaminyl-(N-acetylneuraminyl)-D- galactosyl-D-glucosylceramide'					'5239'	'N1,N12-Diacetylspermine[C]=N1,N12-Diacetylspermine[X]'
'm1941'	'alpha-N-Acetylneuraminyl-2,3-beta-D-galactosyl-1,4-N-acetyl-beta-D- glucosaminyl-1,3-beta-D-galactosyl-1,4-D-glucosylceramide'					'5240'	'O-beta-D-Xylosylprotein[G]=O-beta-D-Xylosylprotein[C]'
'm1942'	'Gal-alpha1-_LT_3(Fuc-alpha1-_LT_2)Gal-beta1-_LT_3GlcNAc-beta1-_LT_3LacCer'					'5242'	'5-Formyltetrahydrofolate[C]+H+[C]=5-Formyltetrahydrofolate[M]+H+[M]'
'm1943'	'Gal-alpha1-_LT_3(Fuc-alpha1-_LT_2)Gal-beta1-_LT_3GlcNAc-beta1-_LT_3LacCer'					'5246'	'7alpha-Hydroxycholesterol[C]+H+[C]=7alpha-Hydroxycholesterol[M]+H+[M]'
'm1944'	'Gal-alpha1-_LT_3(Fuc-alpha1-_LT_2)Gal-beta1-_LT_3GlcNAc-beta1-_LT_3LacCer'					'5249'	'4-(2-Aminoethyl)-1,2-benzenediol[C]+H+[C]=4-(2-Aminoethyl)-1,2-benzenediol[M]+H+[M]'
'm1945'	'L-Glutamine'					'5254'	'Dolichyl phosphate D-mannose[C]=Dolichyl phosphate D-mannose[R]'
'm1946'	'L-Glutamine'					'5255'	'17beta-Hydroxyandrostan-3-one[C]=17beta-Hydroxyandrostan-3-one[L]'
'm1947'	'Cys-Gly'					'5258'	'3,4-Dihydroxyphenylacetaldehyde[X]=3,4-Dihydroxyphenylacetaldehyde[C]'
'm1948'	'D-Ribose'					'5262'	'1-Acyl-sn-glycero-3-phosphocholine[C]=1-Acyl-sn-glycero-3-phosphocholine[L]'
'm1949'	'D-Xylose'					'5265'	'D-Glucosaminylphosphatidylinositol[C]=D-Glucosaminylphosphatidylinositol[E] (reversible)'
'm1950'	'D-Xylose'					'5270'	'1-Organyl-2-lyso-sn-glycero-3-phosphocholine[C]+H+[C]=1-Organyl-2-lyso-sn-glycero-3-phosphocholine[M]+H+[M]'
'm1951'	'D-Xylulose'					'5273'	'(2S,3S)-3-Hydroxy-2-methylbutanoyl-CoA[C]+H+[C]=(2S,3S)-3-Hydroxy-2-methylbutanoyl-CoA[M]+H+[M] (reversible)'
'm1952'	'L-Xylulose'					'5279'	'3beta-Hydroxyandrost-5-en-17-one 3-sulfate[C]=3beta-Hydroxyandrost-5-en-17-one 3-sulfate[G]'
'm1953'	'L-Arabinose'					'5282'	'1-Alkyl-2-acetyl-sn-glycero-3-phosphocholine[C]=1-Alkyl-2-acetyl-sn-glycero-3-phosphocholine[N]'
'm1954'	'2-Acetyl-1-alkyl-sn-glycero-3-phosphate'					'5284'	'3alpha,7alpha-Dihydroxy-5beta-cholestanoyl-CoA[C]+H+[C]=3alpha,7alpha-Dihydroxy-5beta-cholestanoyl-CoA[M]+H+[M] (reversible)'
'm1955'	'L-Valine'					'5287'	'Prostaglandin A1[C]+H+[C]=Prostaglandin A1[M]+H+[M]'
'm1956'	'L-Valine'					'5291'	'Trihexosylceramide[C]=Trihexosylceramide[L]'
'm1957'	'L-Valine'					'5293'	'3alpha,7alpha,12alpha-Trihydroxy-5beta-cholestanoyl-CoA[C]=3alpha,7alpha,12alpha-Trihydroxy-5beta-cholestanoyl-CoA[X]'
'm1958'	'Betaine'					'5294'	'3alpha,7alpha,12alpha-Trihydroxy-5beta-cholestanoyl-CoA[R]=3alpha,7alpha,12alpha-Trihydroxy-5beta-cholestanoyl-CoA[C]'
'm1959'	'Betaine'					'5296'	'5(S)-HETE[C]=5(S)-HETE[R]'
'm1960'	'Betaine'					'5298'	'(5Z,9E,14Z)-(8xi,11R,12S)-11,12-Epoxy-8-hydroxyicosa-5,9,14-trienoic[C]=(5Z,9E,14Z)-(8xi,11R,12S)-11,12-Epoxy-8-hydroxyicosa-5,9,14-trienoic[N]'
'm1961'	'L-Methionine'					'5301'	'N-Acetyl-D-galactosaminyl-(N-acetylneuraminyl)-D-galactosyl-D-[C]=N-Acetyl-D-galactosaminyl-(N-acetylneuraminyl)-D-galactosyl-D-[E] (reversible)'
'm1962'	'L-Methionine'					'5303'	'alpha-N-Acetylneuraminyl-2,3-beta-D-galactosyl-1,3-N-acetyl-alpha-D-[C]=alpha-N-Acetylneuraminyl-2,3-beta-D-galactosyl-1,3-N-acetyl-alpha-D-[E] (reversible)'
'm1963'	'L-Methionine'					'5305'	'D-Galactosyl-N-acetyl-D-galactosaminyl-(N-acetylneuraminyl)-D-[C]=D-Galactosyl-N-acetyl-D-galactosaminyl-(N-acetylneuraminyl)-D-[L]'
'm1964'	'L-Methionine'					'5308'	'2,3,2'',3''-Tetrakis(3-hydroxytetradecanoyl)-D-glucosaminyl-1,6-beta-[C]=2,3,2'',3''-Tetrakis(3-hydroxytetradecanoyl)-D-glucosaminyl-1,6-beta-[G]'
'm1965'	'2-Deoxy-D-ribose 1-phosphate'					'5310'	'2-(alpha-Hydroxyethyl)thiamine diphosphate[C]+H+[C]=2-(alpha-Hydroxyethyl)thiamine diphosphate[M]+H+[M]'
'm1966'	'2-Deoxy-D-ribose 1-phosphate'					'5311'	'N-Methylhistamine[C]+H+[C]=N-Methylhistamine[M]+H+[M]'
'm1967'	'D-Ribose 5-phosphate'					'5312'	'Imidazole-4-acetaldehyde[E]=Imidazole-4-acetaldehyde[C]'
'm1968'	'D-Ribulose 5-phosphate'					'5313'	'Imidazole-4-acetaldehyde[C]+H+[C]=Imidazole-4-acetaldehyde[M]+H+[M]'
'm1969'	'D-Xylulose 5-phosphate'					'5316'	'trans-Dec-2-enoyl-CoA[C]+H+[C]=trans-Dec-2-enoyl-CoA[M]+H+[M] (reversible)'
'm1970'	'alpha-D-Ribose 1-phosphate'					'5317'	'trans-Dec-2-enoyl-CoA[C]=trans-Dec-2-enoyl-CoA[X]'
'm1971'	'alpha-D-Ribose 1-phosphate'					'5325'	'Phenethylamine[C]+H+[C]=Phenethylamine[M]+H+[M]'
'm1972'	'L-Ornithine'					'5331'	'5(S)-HPETE[C]=5(S)-HPETE[N]'
'm1973'	'L-Ornithine'					'5332'	'5(S)-HPETE[C]+H+[C]=5(S)-HPETE[M]+H+[M]'
'm1974'	'Betaine aldehyde'					'5333'	'3-beta-D-Galactosyl-sn-glycerol[C]=3-beta-D-Galactosyl-sn-glycerol[E] (reversible)'
'm1975'	'1-O-1''-alkenyl-2-acyl-phosphatidylethanolamine'					'5334'	'3-beta-D-Galactosyl-sn-glycerol[C]=3-beta-D-Galactosyl-sn-glycerol[G]'
'm1976'	'1-O-1''-alkenyl-2-acyl-phosphatidylethanolamine'					'5335'	'3-beta-D-Galactosyl-sn-glycerol[C]=3-beta-D-Galactosyl-sn-glycerol[L]'
'm1977'	'1-O-1''-alkenyl-2-acyl-phosphatidylethanolamine'					'5336'	'Vitamin D3[C]+H+[C]=Vitamin D3[M]+H+[M]'
'm1978'	'alkylacylglycerophosphoethanolamine'					'5337'	'3alpha,7alpha-Dihydroxy-5beta-cholestan-26-al[C]=3alpha,7alpha-Dihydroxy-5beta-cholestan-26-al[R]'
'm1979'	'alkylacylglycerophosphoethanolamine'					'5338'	'3alpha,7alpha,12alpha-Trihydroxy-5beta-cholestane[C]=3alpha,7alpha,12alpha-Trihydroxy-5beta-cholestane[R]'
'm1980'	'plasmanylethanolamine'					'5341'	'5beta-Pregnane-3,20-dione[C]=5beta-Pregnane-3,20-dione[R]'
'm1981'	'5-Phosphoribosylamine'					'5348'	'17alpha,20alpha-Dihydroxycholesterol[C]+H+[C]=17alpha,20alpha-Dihydroxycholesterol[M]+H+[M]'
'm1982'	'D-Ribose 1,5-bisphosphate'					'5349'	'20alpha-Hydroxycholesterol[R]=20alpha-Hydroxycholesterol[C]'
'm1983'	'Xylitol'					'5351'	'Deoxyinosine[C]=Deoxyinosine[E] (reversible)'
'm1984'	'Xylitol'					'5357'	'3-Methoxytyramine[C]+H+[C]=3-Methoxytyramine[M]+H+[M]'
'm1985'	'L-Arabitol'					'5358'	'L-Metanephrine[C]+H+[C]=L-Metanephrine[M]+H+[M]'
'm1986'	'Isopentenyl diphosphate'					'5359'	'L-Normetanephrine[C]+H+[C]=L-Normetanephrine[M]+H+[M]'
'm1987'	'Isopentenyl diphosphate'					'5371'	'(alpha-D-Mannosyl)4-beta-D-mannosyl-[C]=(alpha-D-Mannosyl)4-beta-D-mannosyl-[R]'
'm1988'	'Dimethylallyl diphosphate'					'5374'	'Leukotriene E4[C]=Leukotriene E4[X]'
'm1989'	'Dimethylallyl diphosphate'					'5377'	'Phosphatidylinositol-3,4,5-trisphosphate[C]=Phosphatidylinositol-3,4,5-trisphosphate[N]'
'm1990'	'1-O-alk-1''-enyl-2-lyso-phosphatidylethanolamine'					'5379'	'(S)-Methylmalonate semialdehyde[C]+H+[C]=(S)-Methylmalonate semialdehyde[M]+H+[M] (reversible)'
'm1991'	'1-O-alk-1''-enyl-2-lyso-phosphatidylethanolamine'					'5382'	'Digalactosylceramide[C]=Digalactosylceramide[L]'
'm1992'	'1-O-alk-1''-enyl-2-lyso-phosphatidylethanolamine'					'5402'	'Anandamide[C]=Anandamide[R]'
'm1993'	'5-Phospho-alpha-D-ribose 1-diphosphate'					'5404'	'Dihydroceramide[C]=Dihydroceramide[R] (reversible)'
'm1994'	'Choline'					'5405'	'Dihydroceramide[C]=Dihydroceramide[G]'
'm1995'	'Choline'					'5406'	'Dihydroceramide[C]=Dihydroceramide[L]'
'm1996'	'Choline'					'5408'	'2-Arachidonoylglycerol[C]=2-Arachidonoylglycerol[R]'
'm1997'	'Choline'					'5409'	'2-Arachidonoylglycerol[C]=2-Arachidonoylglycerol[G]'
'm1998'	'Choline'					'5412'	'alpha-Tocotrienol[C]=alpha-Tocotrienol[R]'
'm1999'	'sn-glycero-3-Phosphoethanolamine'					'5415'	'5,6-EET[C]=5,6-EET[X]'
[truncated: 2,314 more rows]

## Sheet: iCervixSquamous1557
Metabolite ID	Metabolite Name				Reaction ID	Reaction Name
'm1'	'Reduced acceptor'				'9'	'2 5-Aminolevulinate=Porphobilinogen+2 H2O'
'm2'	'Reduced acceptor'				'11'	'2 Prostaglandin H2+Oxygen=2 Prostaglandin G2'
'm3'	'Reduced acceptor'				'13'	'Oxygen+4 Fe2++4 H+=4 Fe3++2 H2O'
'm4'	'Reduced ferredoxin'				'14'	'Oxygen+4 Fe2++4 H+=4 Fe3++2 H2O'
'm5'	'Oxidized ferredoxin'				'17'	'ATP+H2O=ADP+Orthophosphate'
'm6'	'Lipopolysaccharide'				'18'	'ATP+H2O=ADP+Orthophosphate'
'm7'	'Lipopolysaccharide'				'19'	'ATP+H2O=ADP+Orthophosphate'
'm8'	'Ferricytochrome b5'				'20'	'ATP+H2O=ADP+Orthophosphate'
'm9'	'Ferricytochrome b5'				'21'	'ATP+H2O=ADP+Orthophosphate'
'm10'	'Ferrocytochrome b5'				'22'	'ATP+H2O=ADP+Orthophosphate'
'm11'	'Ferrocytochrome b5'				'23'	'ATP=3'',5''-Cyclic AMP+Pyrophosphate'
'm12'	'Electron-transferring flavoprotein'				'25'	'NAD++2 Glutathione=Oxidized glutathione+NADH'
'm13'	'Reduced electron-transferring flavoprotein'				'26'	'NADH+2 Ferricytochrome b5=NAD++2 Ferrocytochrome b5'
'm14'	'Glutaredoxin'				'28'	'NADH+2 Ferricytochrome b5=NAD++2 Ferrocytochrome b5'
'm15'	'Glutaredoxin'				'30'	'NAD++H2O=AMP+Nicotinamide D-ribonucleotide'
'm16'	'Glutaredoxin'				'31'	'NAD++H2O=AMP+Nicotinamide D-ribonucleotide'
'm17'	'Glutaredoxin disulfide'				'34'	'NAD++H2O=AMP+Nicotinamide D-ribonucleotide'
'm18'	'Glutaredoxin disulfide'				'35'	'ATP+NAD+=ADP+NADP+'
'm19'	'Glutaredoxin disulfide'				'41'	'NADPH+NAD+=NADP++NADH'
'm20'	'vitamin E radical'				'42'	'NADPH+NAD+=NADP++NADH'
'm21'	'Benzo[a]pyrene-2,3-diol'				'44'	'NADP++2 Glutathione=Oxidized glutathione+NADPH+H+'
'm22'	'Benzo[a]pyrene-2,3-diol'				'46'	'ADP+H2O=AMP+Orthophosphate'
'm23'	'Benzo[a]pyrene-4,5-diol'				'50'	'ATP+AMP=2 ADP'
'm24'	'Benzo[a]pyrene-4,5-diol'				'51'	'ATP+AMP=2 ADP'
'm25'	'Benzo[a]pyrene-9,10-diol'				'52'	'ATP+AMP=2 ADP'
'm26'	'Benzo[a]pyrene-9,10-diol'				'57'	'2 ATP+NH3+CO2+H2O=2 ADP+Orthophosphate+Carbamoylphosphate'
'm27'	'Benzo[a]pyrene-2,3-oxide'				'58'	'UDP+H2O=UMP+Orthophosphate'
'm28'	'Benzo[a]pyrene-2,3-oxide'				'59'	'UDP+H2O=UMP+Orthophosphate'
'm29'	'Dibenzo[a,l]pyrene-11,12-epoxide'				'60'	'UDP+H2O=UMP+Orthophosphate'
'm30'	'Dibenzo[a,l]pyrene-11,12-epoxide'				'61'	'UDP+H2O=UMP+Orthophosphate'
'm31'	'Dibenzo[a,l]pyrene-11,12-diol'				'62'	'ATP+UDP=ADP+UTP'
'm32'	'Dibenzo[a,l]pyrene-11,12-diol'				'64'	'ATP+UDP=ADP+UTP'
'm33'	'7,12-Dimethylbenz[a]anthracene-3,4-oxide'				'68'	'UTP+H2O=UDP+Orthophosphate'
'm34'	'7,12-Dimethylbenz[a]anthracene-3,4-oxide'				'69'	'UTP+H2O=UDP+Orthophosphate'
'm35'	'7,12-Dimethylbenz[a]anthracene-3,4-diol'				'70'	'UTP+H2O=UDP+Orthophosphate'
'm36'	'7,12-Dimethylbenz[a]anthracene-3,4-diol'				'71'	'UTP+H2O=UDP+Orthophosphate'
'm37'	'Reduced-Quinones'				'72'	'FAD+H2O=AMP+FMN'
'm38'	'ACYL-SN-GLYCEROL-3P'				'73'	'FAD+H2O=AMP+FMN'
'm39'	'Fatty-Acyl-CoA'				'74'	'ATP+FMN=Pyrophosphate+FAD'
'm40'	'Diacylglycerides'				'94'	'AMP+H2O=IMP+NH3'
'm41'	'Semiquinones'				'96'	'AMP+H2O=Adenosine+Orthophosphate'
'm42'	'Protein-Disulfides'				'97'	'AMP+H2O=Adenosine+Orthophosphate'
'm43'	'Starch'				'106'	'S-Adenosyl-L-homocysteine+H2O=Adenosine+L-Homocysteine'
'm44'	'Amylose'				'109'	'ATP+Pyruvate=ADP+Phosphoenolpyruvate'
'm45'	'Chlordecone'				'111'	'Pyruvate+CoA+NAD+=Acetyl-CoA+CO2+NADH'
'm46'	'Protein-Tyrosines'				'112'	'Pyruvate+CoA+NADP+=Acetyl-CoA+CO2+NADPH'
'm47'	'Protein tyrosine'				'113'	'Pyruvate+CoA+NADP+=Acetyl-CoA+CO2+NADPH'
'm48'	'Protein tyrosine'				'114'	'(S)-Malate+NAD+=Pyruvate+CO2+NADH'
'm49'	'Protein tyrosine'				'115'	'(S)-Malate+NAD+=Pyruvate+CO2+NADH'
'm50'	'1,2-Dihydronaphthalene-1,2-diol'				'116'	'(S)-Malate+NADP+=Pyruvate+CO2+NADPH'
'm51'	'1,2-Dihydronaphthalene-1,2-diol'				'117'	'(S)-Malate+NADP+=Pyruvate+CO2+NADPH'
'm52'	'1,2-Dihydronaphthalene-1,2-diol'				'127'	'2 Acetyl-CoA=CoA+Acetoacetyl-CoA'
'm53'	'1,2-Dihydroxy-3,4-epoxy-1,2,3,4-tetrahydronaphthalene'				'132'	'L-Glutamate 5-semialdehyde+NAD++H2O=L-Glutamate+NADH+H+'
'm54'	'Protein tyrosine phosphate'				'137'	'ATP+L-Glutamate+NH3=ADP+Orthophosphate+L-Glutamine'
'm55'	'Protein tyrosine phosphate'				'140'	'ATP+Deamino-NAD++L-Glutamine+H2O=AMP+Pyrophosphate +NAD++L-Glutamate'
'm56'	'Protein tyrosine phosphate'				'141'	'L-Alanine+2-Oxoglutarate=Pyruvate+L-Glutamate (reversible)'
'm57'	'Indole-3-ethanol'				'143'	'L-Glutamate=4-Aminobutanoate+CO2'
'm58'	'Tryptamine'				'144'	'L-Glutamate=4-Aminobutanoate+CO2'
'm59'	'Tryptamine'				'148'	'Oxalosuccinate=2-Oxoglutarate+CO2'
'm60'	'Serotonin'				'152'	'2 O2.-+2 H+=H2O2+Oxygen'
'm61'	'Serotonin'				'153'	'2 O2.-+2 H+=H2O2+Oxygen'
'm62'	'L-Kynurenine'				'155'	'2 O2.-+2 H+=H2O2+Oxygen (reversible)'
'm63'	'Kynurenine'				'157'	'2 O2.-+2 H+=H2O2+Oxygen (reversible)'
'm64'	'3-Hydroxykynurenine'				'161'	'UDPglucose+H2O=UMP+D-Glucose 1-phosphate'
'm65'	'3-Hydroxy-L-kynurenine'				'162'	'UDPglucose+H2O=UMP+D-Glucose 1-phosphate'
'm66'	'serotonin _ST_i_LT_O_ST_/i_LT_-sulfate'				'164'	'UDPglucose=UDP-D-galactose'
'm67'	'Deoxyinosine'				'166'	'Protoporphyrin+Fe2+=Heme+2 H+'
'm68'	'Thioredoxin disulfide'				'167'	'Protoporphyrin+Fe2+=Heme+2 H+'
'm69'	'Thioredoxin disulfide'				'171'	'GDP+H2O=GMP+Orthophosphate'
'm70'	'Thioredoxin disulfide'				'172'	'GDP+H2O=GMP+Orthophosphate'
'm71'	'Inosine'				'173'	'GDP+H2O=GMP+Orthophosphate'
'm72'	'Inosine'				'175'	'GDP+H2O=GMP+Orthophosphate'
'm73'	'Xanthosine'				'176'	'GDP+H2O=GMP+Orthophosphate'
'm74'	'3'',5''-Cyclic AMP'				'181'	'ATP+GDP=ADP+GTP'
'm75'	'3'',5''-Cyclic GMP'				'183'	'ATP+GDP=ADP+GTP'
'm76'	'3'',5''-Cyclic GMP'				'188'	'GTP+H2O=GDP+Orthophosphate'
'm77'	'3-_ST_i_LT_O_ST_/i_LT_-methyldopa'				'189'	'GTP+H2O=GDP+Orthophosphate'
'm78'	'IMP'				'192'	'(S)-Malate+NAD+=Oxaloacetate+NADH+H+'
'm79'	'IMP'				'197'	'L-Aspartate+2-Oxoglutarate=Oxaloacetate+L-Glutamate'
'm80'	'IMP'				'198'	'L-Aspartate+2-Oxoglutarate=Oxaloacetate+L-Glutamate'
'm81'	'Xanthosine 5''-phosphate'				'202'	'Citrate=Acetate+Oxaloacetate (reversible)'
'm82'	'Deoxyadenosine'				'206'	'L-Alanine+Glyoxylate=Pyruvate+Glycine (reversible)'
'm83'	'Deoxyadenosine'				'207'	'Acetyl-CoA+Glycine=CoA+L-2-Amino-3-oxobutanoic acid'
'm84'	'Deoxyadenosine'				'224'	'Succinyl-CoA+Acetoacetate=Succinate+Acetoacetyl-CoA'
'm85'	'Adenosine'				'231'	'GTP+Pyruvate=GDP+Phosphoenolpyruvate'
'm86'	'Adenosine'				'232'	'GTP+Oxaloacetate=GDP+Phosphoenolpyruvate+CO2'
'm87'	'Deoxyguanosine'				'235'	'GTP=3'',5''-Cyclic GMP+Pyrophosphate'
'm88'	'Deoxyguanosine'				'236'	'GTP=3'',5''-Cyclic GMP+Pyrophosphate'
'm89'	'Guanosine'				'257'	'L-Lysine+Oxygen+H2O=6-Amino-2-oxohexanoate+NH3+H2O2'
'm90'	'Guanosine'				'261'	'L-Aspartate=beta-Alanine+CO2'
'm91'	'Porphobilinogen'				'262'	'L-Aspartate=beta-Alanine+CO2'
'm92'	'Thymidine'				'266'	'UDP-D-galactose+D-Glucose=UDP+Lactose'
'm93'	'Thymidine'				'267'	'UDP-D-galactose+D-Glucose=UDP+Lactose'
'm94'	'IDP'				'268'	'UDP-D-galactose+D-Glucose=UDP+Lactose'
'm95'	'IDP'				'269'	'3''-Phosphoadenylyl sulfate+H2O=Sulfate+Adenosine3'',5''-bisphosphate'
'm96'	'IDP'				'270'	'3''-Phosphoadenylyl sulfate+H2O=Sulfate+Adenosine3'',5''-bisphosphate'
'm97'	'Thioredoxin'				'273'	'CMP+H2O=Cytidine+Orthophosphate'
'm98'	'Thioredoxin'				'276'	'CMP+H2O=Cytidine+Orthophosphate'
'm99'	'Thioredoxin'				'278'	'ATP+CMP=ADP+CDP'
'm100'	'Adenylyl sulfate'				'279'	'ATP+CMP=ADP+CDP'
'm101'	'dAMP'				'281'	'CDP+H2O=CMP+Orthophosphate'
'm102'	'dAMP'				'282'	'CDP+H2O=CMP+Orthophosphate'
'm103'	'dAMP'				'283'	'CDP+H2O=CMP+Orthophosphate'
'm104'	'AMP'				'284'	'CDP+H2O=CMP+Orthophosphate'
'm105'	'AMP'				'289'	'ATP+Sulfate=Pyrophosphate+Adenylylsulfate'
'm106'	'AMP'				'307'	'CTP+H2O=CDP+Orthophosphate'
'm107'	'AMP'				'308'	'CTP+H2O=CDP+Orthophosphate'
'm108'	'AMP'				'309'	'CTP+H2O=CDP+Orthophosphate'
'm109'	'AMP'				'310'	'CTP+H2O=CDP+Orthophosphate'
'm110'	'dGMP'				'313'	'ATP+CDP=ADP+CTP'
'm111'	'GMP'				'319'	'L-Serine+Pyruvate=Hydroxypyruvate+L-Alanine (reversible)'
'm112'	'GMP'				'325'	'Methanol+H2O2=Formaldehyde+2 H2O'
'm113'	'GMP'				'330'	'Sarcosine+H2O+Oxygen=Glycine+Formaldehyde+H2O2'
'm114'	'GMP'				'333'	'ATP+Thiamin diphosphate=ADP+Thiamin triphosphate'
'm115'	'GMP'				'336'	'2-Oxoglutarate+Thiamin diphosphate ST = LT 3-Carboxy-1-hydroxypropyl-ThPP+CO2'
'm116'	'Parathion'				'343'	'2-Phospho-D-glycerate=Phosphoenolpyruvate+H2O'
'm117'	'Paraoxon'				'344'	'2-Phospho-D-glycerate=Phosphoenolpyruvate+H2O'
'm118'	'dTMP'				'345'	'UTP+Pyruvate=UDP+Phosphoenolpyruvate'
'm119'	'dTMP'				'348'	'L-Ornithine+2-Oxoglutarate=L-Glutamate 5-semialdehyde +L-Glutamate'
'm120'	'dTMP'				'350'	'L-Ornithine=Putrescine+CO2'
'm121'	'dTMP'				'351'	'L-Ornithine=Putrescine+CO2'
'm122'	'dTMP'				'353'	'L-Tryptophan+Oxygen=Formylkynurenine'
'm123'	'ITP'				'354'	'L-Tryptophan=Tryptamine+CO2'
'm124'	'ITP'				'357'	'L-Phenylalanine+2-Oxoglutarate=Phenylpyruvate+L-Glutamate'
'm125'	'ITP'				'358'	'L-Phenylalanine=2-Phenylacetamide'
'm126'	'1-(5''-Phosphoribosyl)-5-formamido-4-imidazolecarboxamide'				'360'	'L-Phenylalanine=Phenethylamine+CO2'
'm127'	'ADP'				'362'	'2 trans,trans-Farnesyl diphosphate=Pyrophosphate+Presqualenediphosphate+H+'
'm128'	'ADP'				'365'	'3-Oxopropanoate+CoA+NAD+=Acetyl-CoA+CO2+NADH+H+'
'm129'	'ADP'				'366'	'3-Oxopropanoate+CoA+NADP+=Acetyl-CoA+CO2+NADPH+H+'
'm130'	'ADP'				'367'	'(S)-1-Pyrroline-5-carboxylate+NAD++2 H2O=L-Glutamate+NADH+ H+'
'm131'	'ADP'				'368'	'(S)-1-Pyrroline-5-carboxylate+NADP++2 H2O=L-Glutamate +NADPH+H+'
'm132'	'ADP'				'370'	'Isocitrate+NAD+=2-Oxoglutarate+CO2+NADH+H+'
'm133'	'Adenosine 3'',5''-bisphosphate'				'371'	'Acetaldehyde+NAD++H2O=Acetate+NADH+H+'
'm134'	'Adenosine 3'',5''-bisphosphate'				'372'	'Acetaldehyde+NAD++H2O=Acetate+NADH+H+'
'm135'	'Adenosine 3'',5''-bisphosphate'				'373'	'Acetaldehyde+NADP++H2O=Acetate+NADPH+H+'
'm136'	'dGDP'				'374'	'Acetaldehyde+NADP++H2O=Acetate+NADPH+H+'
'm137'	'dGDP'				'376'	'Succinate semialdehyde+NAD++H2O=Succinate+NADH+H+'
'm138'	'dGDP'				'377'	'N6-(L-1,3-Dicarboxypropyl)-L-lysine+NAD++H2O=L-Lysine +2-Oxoglutarate+NADH+H+'
'm139'	'GDP'				'378'	'N6-(L-1,3-Dicarboxypropyl)-L-lysine+NADP++H2O=L-Lysine +2-Oxoglutarate+NADPH+H+'
'm140'	'GDP'				'380'	'ITP+H2O=IDP+Orthophosphate'
'm141'	'GDP'				'381'	'ITP+H2O=IDP+Orthophosphate'
'm142'	'GDP'				'386'	'ATP+IDP=ADP+ITP'
'm143'	'GDP'				'388'	'ATP+IDP=ADP+ITP'
'm144'	'GDP'				'389'	'ITP+D-Glucose=IDP+D-Glucose 6-phosphate'
'm145'	'3''-Phosphoadenylyl sulfate'				'391'	'ITP+Oxaloacetate=IDP+Phosphoenolpyruvate+CO2'
'm146'	'3''-Phosphoadenylyl sulfate'				'398'	'L-Tyrosine+2-Oxoglutarate=3-(4-Hydroxyphenyl)pyruvate +L-Glutamate'
'm147'	'3''-Phosphoadenylyl sulfate'				'400'	'L-Tyrosine=Tyramine+CO2'
'm148'	'dADP'				'404'	'3-Oxopropanoate+CoA+NADP+=Malonyl-CoA+NADPH'
'm149'	'dADP'				'406'	'Ethanol+NADP+=Acetaldehyde+NADPH'
'm150'	'dADP'				'413'	'D-Mannose 6-phosphate=D-Fructose 6-phosphate'
'm151'	'L-Metanephrine'				'423'	'Succinyl-CoA+Acetyl-CoA=CoA+3-Oxoadipyl-CoA'
'm152'	'L-Metanephrine'				'425'	'Succinyl-CoA+Glycine=5-Aminolevulinate+CoA+CO2'
'm153'	'dTDP'				'426'	'Succinyl-CoA+Glycine=2-Amino-3-oxoadipate+CoA'
'm154'	'dTDP'				'427'	'(R)-2-Methyl-3-oxopropanoyl-CoA=Succinyl-CoA (reversible)'
'm155'	'dTDP'				'428'	'1L-myo-Inositol 1-phosphate=D-Glucose 6-phosphate (reversible)'
'm156'	'dTDP'				'430'	'sn-Glycerol 3-phosphate+NAD+=Glycerone phosphate+NADH+H+'
'm157'	'dTDP'				'432'	'ATP+Glycerol=ADP+sn-Glycerol 3-phosphate'
'm158'	'dTDP'				'434'	'sn-Glycerol 3-phosphate+FAD=Glycerone phosphate+FADH2'
'm159'	'dATP'				'436'	'sn-Glycerol 3-phosphate+Acceptor=Glycerone phosphate+Reducedacceptor'
'm160'	'dATP'				'440'	'ATP+D-Fructose=ADP+beta-D-Fructose 6-phosphate'
'm161'	'dATP'				'441'	'D-Sorbitol+NAD+=D-Fructose+NADH+H+ (reversible)'
'm162'	'ATP'				'442'	'ITP+D-Fructose=IDP+D-Fructose 6-phosphate'
'm163'	'ATP'				'449'	'L-Cysteine+Oxygen=3-Sulfino-L-alanine'
'm164'	'ATP'				'450'	'ATP+L-Glutamate+L-Cysteine=ADP+Orthophosphate +gamma-L-Glutamyl-L-cysteine'
'm165'	'ATP'				'451'	'L-Cysteine+2-Oxoglutarate=Mercaptopyruvate+Glutamate'
'm166'	'ATP'				'452'	'L-Cysteine+2-Oxoglutarate=Mercaptopyruvate+Glutamate'
'm167'	'ATP'				'453'	'Cys-Gly+H2O=L-Cysteine+Glycine'
'm168'	'ATP'				'454'	'beta-Aminopropion aldehyde+NAD++H2O=beta-Alanine+NADH'
'm169'	'dGTP'				'456'	'beta-Aminopropion aldehyde+NAD++H2O=beta-Alanine+NADH'
'm170'	'dGTP'				'458'	'beta-Alanine+2-Oxoglutarate=3-Oxopropanoate+L-Glutamate'
'm171'	'dGTP'				'463'	'Propanoyl-CoA+Acetyl-CoA=CoA+2-Methylacetoacetyl-CoA'
'm172'	'GTP'				'464'	'(S)-Methylmalonate semialdehyde+CoA+NAD+=Propanoyl-CoA+CO2+ NADH+H+'
'm173'	'GTP'				'475'	'Tetrahydrofolate+Formate+ATP=ADP+Orthophosphate +10-Formyltetrahydrofolate'
'm174'	'GTP'				'476'	'5,10-Methylenetetrahydrofolate+Glycine+H2O=Tetrahydrofolate+ L-Serine'
'm175'	'Aminoparathion'				'477'	'5,10-Methylenetetrahydrofolate+Glycine+H2O=Tetrahydrofolate+ L-Serine'
'm176'	'dTTP'				'481'	'D-Glucose 1-phosphate=alpha-D-Glucose 6-phosphate'
'm177'	'dTTP'				'483'	'IDP+H2O=IMP+Orthophosphate'
'm178'	'dTTP'				'489'	'UMP+H2O=Uridine+Orthophosphate'
'm179'	'dTTP'				'492'	'UMP+H2O=Uridine+Orthophosphate'
'm180'	'dTTP'				'503'	'2-Hydroxybutanoic acid+NAD+=2-Oxobutanoate+NADH+H+'
'm181'	'dTTP'				'507'	'UDPglucose+Dolichyl phosphate=UDP+Dolichyl beta-D-glucosylphosphate'
'm182'	'Glutathione'				'509'	'UDP-N-acetyl-D-glucosamine+Dolichyl phosphate=UMP +N-Acetyl-D-glucosaminyldiphosphodolichol'
'm183'	'Glutathione'				'511'	'GDPmannose+Dolichyl phosphate=GDP+Dolichyl phosphateD-mannose'
'm184'	'Glutathione'				'517'	'CTP+Dolichol=CDP+Dolichyl phosphate'
'm185'	'Glutathione'				'519'	'Acetyl-CoA+Choline=CoA+Acetylcholine'
'm186'	'N-Acylneuraminate 9-phosphate'				'522'	'Acetylcholine+H2O=Choline+Acetate'
'm187'	'N-(L-Arginino)succinate'				'523'	'Acetylcholine+H2O=Choline+Acetate'
'm188'	'Phosphatidylcholine'				'524'	'Acetylcholine+H2O=Choline+Acetate'
'm189'	'Phosphatidylcholine'				'525'	'Acylcholine+H2O=Choline+Carboxylate'
'm190'	'Phosphatidylcholine'				'528'	'Glycerol+NAD+=D-Glyceraldehyde+NADH+H+'
'm191'	'Phosphatidylcholine'				'529'	'Glycerol+NAD+=D-Glyceraldehyde+NADH+H+'
'm192'	'S-Acetyldihydrolipoamide'				'531'	'Glycerol+NADP+=D-Glyceraldehyde+NADPH+H+'
'm193'	'spermic acid 2'				'532'	'Glycerol+NADP+=D-Glyceraldehyde+NADPH+H+'
'm194'	'spermic acid 2'				'551'	'(S)-Malate=Fumarate+H2O'
'm195'	'spermic acid 2'				'554'	'L-Leucine+2-Oxoglutarate=4-Methyl-2-oxopentanoate +L-Glutamate'
'm196'	'Geranyl diphosphate'				'558'	'D-Galactose+NAD+=Galactitol+NADH'
'm197'	'spermine dialdehyde'				'560'	'D-Galactose+NADP+=Galactitol+NADPH'
'm198'	'spermine dialdehyde'				'565'	'Melibiose+H2O=D-Galactose+D-Glucose'
'm199'	'spermine dialdehyde'				'569'	'Raffinose+H2O=D-Galactose+Sucrose'
'm200'	'2-Acetyl-1-alkyl-sn-glycero-3-phosphocholine'				'573'	'3-beta-D-Galactosyl-sn-glycerol+H2O=D-Galactose+Glycerol'
'm201'	'deoxyhypusine'				'574'	'3-beta-D-Galactosyl-sn-glycerol+H2O=D-Galactose+Glycerol'
'm202'	'spermine monoaldehyde'				'575'	'3-beta-D-Galactosyl-sn-glycerol+H2O=D-Galactose+Glycerol'
'm203'	'Spermine'				'585'	'IMP+H2O=Inosine+Orthophosphate'
'm204'	'Chlordecone alcohol'				'587'	'IMP+H2O=Inosine+Orthophosphate'
'm205'	'4-Hydroxy-2-quinolinecarboxylic acid'				'602'	'ATP+dADP=ADP+dATP'
'm206'	'Xanthurenic acid'				'604'	'ATP+dADP=ADP+dATP'
'm207'	'Naphthalene'				'605'	'dATP+Pyruvate=dADP+Phosphoenolpyruvate'
'm208'	'Naphthalene'				'606'	'dATP+D-Glucose=dADP+D-Glucose 6-phosphate'
'm209'	'Naphthalene'				'608'	'dATP+D-Fructose=dADP+D-Fructose 6-phosphate'
'm210'	'2-Naphthol'				'612'	'Acetyl-CoA+Putrescine=CoA+N-Acetylputrescine'
'm211'	'(1R,2S)-Naphthalene 1,2-oxide'				'614'	'Carnosine+H2O=beta-Alanine+L-Histidine'
'm212'	'(1R,2S)-Naphthalene 1,2-oxide'				'615'	'L-Histidine=1H-Imidazole-4-ethanamine+CO2'
'm213'	'(1R,2S)-Naphthalene 1,2-oxide'				'617'	'L-Histidine=Urocanate+NH3'
'm214'	'(1R,2S)-Naphthalene 1,2-oxide'				'618'	'Butanoyl-CoA+NAD+=Crotonoyl-CoA+NADH+H+'
'm215'	'(1S,2R)-Naphthalene 1,2-oxide'				'619'	'Butanoyl-CoA+FAD=FADH2+Crotonoyl-CoA'
'm216'	'(1S,2R)-Naphthalene 1,2-oxide'				'621'	'Acetyl-CoA+Butanoyl-CoA=CoA+3-Oxohexanoyl-CoA'
'm217'	'(1S,2R)-Naphthalene 1,2-oxide'				'623'	'1L-myo-Inositol 1-phosphate+H2O=myo-Inositol+Orthophosphate'
'm218'	'(1S,2R)-Naphthalene 1,2-oxide'				'624'	'myo-Inositol 4-phosphate+H2O=myo-Inositol+Orthophosphate'
'm219'	'Naphthalene-1,2-diol'				'625'	'1D-myo-Inositol 3-phosphate+H2O=myo-Inositol+Orthophosphate'
'm220'	'Indole-3-acetaldehyde'				'629'	'Reduced ferredoxin+NADP+=Oxidized ferredoxin+NADPH+H+'
'm221'	'Indole-3-acetaldehyde'				'633'	'UDP-D-galactose+N-Acetyl-D-glucosamine=UDP +N-Acetyllactosamine'
'm222'	'Indole-3-acetate'				'634'	'UDP-D-galactose+N-Acetyl-D-glucosamine=UDP +N-Acetyllactosamine'
'm223'	'Indole-3-acetate'				'635'	'UDP-D-galactose+N-Acetyl-D-glucosamine=UDP +N-Acetyllactosamine'
'm224'	'5-Hydroxyindoleacetaldehyde'				'641'	'L-Valine+2-Oxoglutarate=3-Methyl-2-oxobutanoic acid +L-Glutamate'
'm225'	'5-Hydroxyindoleacetaldehyde'				'644'	'5,10-Methylenetetrahydrofolate+NAD+ ST = LT 5,10-Methenyltetrahydrofolate+NADH'
'm226'	'5-Hydroxyindoleacetate'				'646'	'5,10-Methylenetetrahydrofolate+NADP+ ST = LT 5,10-Methenyltetrahydrofolate+NADPH'
'm227'	'5-Hydroxyindoleacetate'				'648'	'Glycine+Tetrahydrofolate+NAD+=5,10-Methylenetetrahydrofolate+ NH3+CO2+NADH+H+'
'm228'	'4-(2-Aminophenyl)-2,4-dioxobutanoate'				'651'	'GMP+H2O=Guanosine+Orthophosphate'
'm229'	'4-(2-Amino-3-hydroxyphenyl)-2,4-dioxobutanoate'				'653'	'GMP+H2O=Guanosine+Orthophosphate'
'm230'	'L-Tryptophan'				'667'	'L-Proline+NAD+=(S)-1-Pyrroline-5-carboxylate+NADH+H+ (reversible)'
'm231'	'L-Tryptophan'				'671'	'L-Proline+2-Oxoglutarate+Oxygen=trans-4-Hydroxy-L-proline +Succinate+CO2'
'm232'	'L-Tryptophan'				'673'	'Glutathione+L-Amino acid=Cys-Gly+(5-L-Glutamyl)-L-amino acid'
'm233'	'5-Hydroxy-L-tryptophan'				'675'	'S-Adenosyl-L-methionine+Nicotinamide=S-Adenosyl-L-homocysteine+ 1-Methylnicotinamide'
'm234'	'5-Hydroxytryptophan'				'677'	'Palmitoyl-CoA+H2O=CoA+Hexadecanoic acid'
'm235'	'L-Formylkynurenine'				'678'	'Palmitoyl-CoA+NADP+=trans-Hexadec-2-enoyl-CoA+NADPH+H+'
'm236'	'Formylkynurenine'				'679'	'Palmitoyl-CoA+FAD=trans-Hexadec-2-enoyl-CoA+FADH2'
'm237'	'Nicotinate D-ribonucleoside'				'681'	'Palmitoyl-CoA+L-Serine=3-Dehydrosphinganine+CoA+CO2'
'm238'	'N-Ribosylnicotinamide'				'682'	'L-Serine+L-Homocysteine=Cystathionine+H2O'
'm239'	'nicotinamide riboside'				'686'	'Phosphatidylcholine+H2O=Phosphatidate+Choline'
'm240'	'Nicotinamide D-ribonucleotide'				'689'	'Phosphatidylcholine+H2O=Phosphatidate+Choline'
'm241'	'Nicotinamide D-ribonucleotide'				'690'	'Phosphatidylcholine+H2O=1-Acyl-sn-glycero-3-phosphocholine +Fatty acid'
'm242'	'Nicotinamide D-ribonucleotide'				'691'	'Phosphatidylcholine+H2O=1-Acyl-sn-glycero-3-phosphocholine +Fatty acid'
'm243'	'5''-Methylthioadenosine'				'692'	'Phosphatidylcholine+H2O=1-Acyl-sn-glycero-3-phosphocholine +Fatty acid'
'm244'	'Nicotinate D-ribonucleotide'				'693'	'Phosphatidylcholine+H2O=1-Acyl-sn-glycero-3-phosphocholine +Fatty acid'
'm245'	'Nicotinate D-ribonucleotide'				'703'	'Citrate=Isocitrate'
'm246'	'Nicotinate D-ribonucleotide'				'704'	'Citrate=Isocitrate'
'm247'	'1,2-Diacyl-3-beta-D-galactosyl-sn-glycerol'				'705'	'Citrate=Isocitrate'
'm248'	'1-Phosphatidyl-D-myo-inositol'				'706'	'Citrate=Isocitrate'
'm249'	'1-Phosphatidyl-D-myo-inositol'				'707'	'Citrate=cis-Aconitate+H2O'
'm250'	'1-Phosphatidyl-D-myo-inositol'				'708'	'Citrate=cis-Aconitate+H2O'
'm251'	'1-Phosphatidyl-D-myo-inositol'				'709'	'Citrate=cis-Aconitate+H2O'
'm252'	'1-Phosphatidyl-1D-myo-inositol 4-phosphate'				'710'	'Citrate=cis-Aconitate+H2O'
'm253'	'1-Phosphatidyl-1D-myo-inositol 4-phosphate'				'711'	'ATP+D-Mannose=ADP+D-Mannose 6-phosphate'
'm254'	'1-Phosphatidyl-1D-myo-inositol 4-phosphate'				'712'	'ITP+D-Mannose=IDP+D-Mannose 6-phosphate'
'm255'	'1-Phosphatidyl-1D-myo-inositol 4-phosphate'				'715'	'Epimelibiose+H2O=D-Mannose+D-Galactose'
'm256'	'1-Phosphatidyl-1D-myo-inositol 3-phosphate'				'718'	'dATP+D-Mannose=dADP+D-Mannose 6-phosphate'
'm257'	'1-Phosphatidyl-1D-myo-inositol 3-phosphate'				'729'	'(S)-3-Hydroxy-3-methylglutaryl-CoA=Acetyl-CoA+Acetoacetate'
'm258'	'1-Phosphatidyl-1D-myo-inositol 3-phosphate'				'734'	'Triacylglycerol+H2O=Diacylglycerol+Carboxylate'
'm259'	'1-phosphatidyl-1D-myo-inositol 5-phosphate'				'738'	'L-Glutamine+Phenylpyruvate=2-Oxoglutaramate+L-Phenylalanine'
'm260'	'N-Acetylneuraminate'				'739'	'Phenylpyruvate=enol-Phenylpyruvate'
'm261'	'1-Phosphatidyl-D-myo-inositol 4,5-bisphosphate'				'742'	'UDPglucuronate=UDP-D-xylose+CO2'
'm262'	'1-Phosphatidyl-D-myo-inositol 4,5-bisphosphate'				'744'	'D-Glycerate+NAD+=Hydroxypyruvate+NADH+H+'
'm263'	'1-Phosphatidyl-D-myo-inositol 4,5-bisphosphate'				'749'	'Carbamoyl phosphate+L-Ornithine=Orthophosphate+L-Citrulline'
'm264'	'1-Phosphatidyl-D-myo-inositol 4,5-bisphosphate'				'750'	'5''-Methylthioadenosine+Orthophosphate=Adenine +S-Methyl-5-thio-D-ribose 1-phosphate'
'm265'	'1-Phosphatidyl-D-myo-inositol 4,5-bisphosphate'				'755'	'Xylitol+NADP+=D-Xylose+NADPH+H+'
'm266'	'1-Phosphatidyl-1D-myo-inositol 3,4-bisphosphate'				'758'	'Cholesterol+NAD+=Cholesta-5,7-dien-3beta-ol+NADH+H+ (reversible)'
'm267'	'1-Phosphatidyl-1D-myo-inositol 3,5-bisphosphate'				'760'	'Cholesterol+NADPH+H++Oxygen=20alpha-Hydroxycholesterol +NADP++H2O'
'm268'	'1-phosphatidyl-1D-myo-inositol 3,4-bisphosphate'				'761'	'Cholesterol+NADP+=Cholesta-5,7-dien-3beta-ol+NADPH+H+ (reversible)'
'm269'	'1-phosphatidyl-1D-myo-inositol 4,5-bisphosphate'				'763'	'Cholesterol+NADP+=Cholesta-5,7-dien-3beta-ol+NADPH+H+'
'm270'	'N6-(L-1,3-Dicarboxypropyl)-L-lysine'				'764'	'Acyl-CoA+Cholesterol=CoA+Cholesterol ester'
'm271'	'N6-(L-1,3-Dicarboxypropyl)-L-lysine'				'765'	'Acyl-CoA+Cholesterol=CoA+Cholesterol ester'
'm272'	'CDP-ethanolamine'				'767'	'Cholesterol+Oxygen+NADPH+H+=7alpha-Hydroxycholesterol +NADP++H2O'
'm273'	'CDP-ethanolamine'				'771'	'H2O+beta-D-Glucuronoside=D-Glucuronate+Alcohol'
'm274'	'N-Acetylneuraminate 9-phosphate'				'775'	'N-Acylsphingosine+H2O=Carboxylate+Sphingosine'
'm275'	'Phosphatidylinositol-3,4,5-trisphosphate'				'776'	'N-Acylsphingosine+H2O=Carboxylate+Sphingosine'
'm276'	'Phosphatidylinositol-3,4,5-trisphosphate'				'777'	'N-Acylsphingosine+H2O=Carboxylate+Sphingosine'
'm277'	'1-phosphatidyl-1D-myo-inositol 3,4,5-trisphosphate'				'778'	'N-Acylsphingosine+H2O=Carboxylate+Sphingosine'
'm278'	'Pantetheine 4''-phosphate'				'779'	'N-Acylsphingosine+H2O=Fatty acid+Sphingosine'
'm279'	'1,4-benzothiazine-o-quinonimine'				'780'	'N-Acylsphingosine+H2O=Fatty acid+Sphingosine'
'm280'	'3,4-dihydro-1,4-benzothiazine-3-carboxylate'				'781'	'N-Acylsphingosine+H2O=Fatty acid+Sphingosine'
'm281'	'5-(S-L-cysteinyl)-dopaquinone'				'783'	'N-Acylsphingosine+H2O=Fatty acid+Sphingosine'
'm282'	'5-S-cysteinyldopa'				'787'	'UDPglucose+N-Acylsphingosine=UDP+Glucosylceramide'
'm283'	'Thiamine'				'791'	'Glucosylceramide+H2O=D-Glucose+N-Acylsphingosine'
'm284'	'Thiamine'				'799'	'beta-D-Glucose+NAD+=D-Glucono-1,5-lactone+NADH (reversible)'
'm285'	'2-(S-Glutathionyl)acetyl chloride'				'800'	'beta-D-Glucose+NADP+=D-Glucono-1,5-lactone+NADPH'
'm286'	'S-(Formylmethyl)glutathione'				'802'	'D-Ribulose 5-phosphate=D-Xylulose 5-phosphate'
'm287'	'Thiamin diphosphate'				'803'	'ATP+dAMP=ADP+dADP'
'm288'	'Thiamin diphosphate'				'804'	'ATP+dAMP=ADP+dADP'
'm289'	'Glutathione episulfonium ion'				'805'	'ATP+dAMP=ADP+dADP'
'm290'	'Thiamin triphosphate'				'813'	'N,N-Dimethylglycine+Acceptor+H2O=Sarcosine+Formaldehyde +Reduced acceptor'
'm291'	'S-Succinyldihydrolipoamide'				'814'	'N,N-Dimethylglycine+Acceptor+H2O=Sarcosine+Formaldehyde +Reduced acceptor'
'm292'	'4(R)-hydroxy-dodec-6Z-enoate'				'816'	'dTMP+H2O=Thymidine+Orthophosphate'
'm293'	'Sucrose'				'822'	'Thymidine+Orthophosphate=Thymine+2-Deoxy-D-ribose1-phosphate'
'm294'	'Lactose'				'825'	'(5Z,8Z,11Z,14Z)-Icosatetraenoic acid+2 Oxygen=Prostaglandin G2'
'm295'	'Lactose'				'826'	'(5Z,8Z,11Z,14Z)-Icosatetraenoic acid+Oxygen=15(S)-HPETE'
'm296'	'Lactose'				'830'	'(5Z,8Z,11Z,14Z)-Icosatetraenoic acid+Oxygen=15(S)-HPETE'
'm297'	'alpha-Maltose'				'831'	'(5Z,8Z,11Z,14Z)-Icosatetraenoic acid+Oxygen=5(S)-HPETE'
'm298'	'Epimelibiose'				'833'	'(5Z,8Z,11Z,14Z)-Icosatetraenoic acid+Oxygen=12(S)-HPETE'
'm299'	'(R)-4''-Phosphopantothenoyl-L-cysteine'				'837'	'ATP+beta-D-Glucose=ADP+beta-D-Glucose 6-phosphate'
'm300'	'6-(alpha-D-Glucosaminyl)-1D-myo-inositol'				'839'	'alpha-D-Glucose=beta-D-Glucose'
'm301'	'Melibiitol'				'846'	'4-Aminobutanoate+2-Oxoglutarate=Succinate semialdehyde +L-Glutamate (reversible)'
'm302'	'N1-Acetylspermine'				'847'	'4-Methyl-2-oxopentanoate+CoA+NAD+=3-Methylbutanoyl-CoA+CO2+ NADH'
'm303'	'1-(5''-Phosphoribosyl)-5-amino-4-(N-succinocarboxamide)-imidazole'				'851'	'5,10-Methenyltetrahydrofolate+H2O=10-Formyltetrahydrofolate +H+'
'm304'	'(R)-S-Lactoylglutathione'				'852'	'Dimethylallyl diphosphate+Isopentenyl diphosphate ST = LT Pyrophosphate+Geranyl diphosphate'
'm305'	'[Dihydrolipoyllysine-residue succinyltransferase] S-glutaryldihydrolipoyllysine'				'853'	'3-Phospho-D-glyceroyl phosphate=2,3-Bisphospho-D-glycerate'
'm306'	'[Dihydrolipoyllysine-residue succinyltransferase] S-glutaryldihydrolipoyllysine'				'855'	'dCMP+H2O=Deoxycytidine+Orthophosphate'
'm307'	'N6-(1,2-Dicarboxyethyl)-AMP'				'856'	'dCMP+H2O=Deoxycytidine+Orthophosphate'
'm308'	'Ubiquinone'				'862'	'ATP+Deoxycytidine=ADP+dCMP'
'm309'	'Ubiquinone'				'864'	'dCDP+H2O=dCMP+Orthophosphate'
'm310'	'CDP-diacylglycerol'				'866'	'Lactose+H2O=alpha-D-Glucose+D-Galactose'
'm311'	'S-Adenosyl-L-homocysteine'				'897'	'D-Glyceraldehyde+NAD++H2O=D-Glycerate+NADH+H+'
'm312'	'Ubiquinol'				'898'	'D-Glyceraldehyde+NAD++H2O=D-Glycerate+NADH+H+'
'm313'	'Ubiquinol'				'899'	'D-Glyceraldehyde+NAD++H2O=D-Glycerate+NADH+H+'
'm314'	'6(R)-hydroxy-tetradeca-2E,4E,8Z-trienoate'				'900'	'D-Glyceraldehyde+NAD++H2O=D-Glycerate+NADH+H+'
'm315'	'6(S)-hydroxy-tetradeca-2E,4E,8Z-trienoate'				'901'	'L-Arabitol+NAD+=L-Arabinose+NADH (reversible)'
'm316'	'UDP-D-xylose'				'902'	'L-Arabitol+NAD+=L-Arabinose+NADH'
'm317'	'UDP-D-xylose'				'904'	'L-Arabitol+NADP+=L-Arabinose+NADPH'
'm318'	'S-Adenosylmethioninamine'				'908'	'Inosine+H2O=Hypoxanthine+D-Ribose'
'm319'	'6(R)-hydroxy-tetradeca-2E,8Z-dienoate'				'910'	'(3S)-3-Hydroxyacyl-CoA+NAD+=3-Oxoacyl-CoA+NADH'
'm320'	'6(R)-hydroxy-tetradeca-4E,8Z-dienoate'				'912'	'ATP+alpha-D-Glucose=ADP+alpha-D-Glucose 6-phosphate'
'm321'	'6(S)-hydroxy-tetradeca-2E,8Z-dienoate'				'924'	'CTP+Phosphatidate=Pyrophosphate+CDPdiacylglycerol'
'm322'	'6(S)-hydroxy-tetradeca-4E,8Z-dienoate'				'935'	'Tetrahydrobiopterin+L-Tryptophan+Oxygen ST = LT 5-Hydroxy-L-tryptophan+Dihydrobiopterin+H2O'
'm323'	'3-oxo-6(R)-hydroxy-tetradec-8-cis-enoate'				'937'	'D-Mannose 6-phosphate=D-Mannose 1-phosphate'
'm324'	'3-oxo-6(S)-hydroxy-tetradec-8Z-enoate'				'957'	'ATP+dGDP=ADP+dGTP'
'm325'	'beta-D-Galactosyl-1,3-N-acetyl-alpha-D-galactosaminyl-R'				'958'	'dGTP+Pyruvate=dGDP+Phosphoenolpyruvate'
'm326'	'N-Acetyllactosamine'				'959'	'ATP+Propanoyl-CoA+HCO3-=ADP+Orthophosphate +(S)-2-Methyl-3-oxopropanoyl-CoA'
'm327'	'N-Acetyllactosamine'				'962'	'(S)-Dihydroorotate+Oxygen=Orotate+H2O2'
'm328'	'N-Acetyllactosamine'				'963'	'(S)-Dihydroorotate+Oxygen=Orotate+H2O2'
'm329'	'Glycoprotein N-acetyl-D-glucosaminyl-phospho-D-mannose'				'965'	'Uridine+Orthophosphate=Uracil+alpha-D-Ribose 1-phosphate'
'm330'	'3(S),6(R)-dihydroxy-tetradec-8Z-enoate'				'967'	'Uridine+Orthophosphate=Uracil+alpha-D-Ribose 1-phosphate'
'm331'	'3(S),6(S)-dihydroxy-tetradec-8Z-enoate'				'973'	'ATP+Creatine=ADP+Phosphocreatine (reversible)'
'm332'	'CDP-choline'				'974'	'ATP+Creatine=ADP+Phosphocreatine'
'm333'	'Triiodothyronine'				'984'	'Isocitrate+NADP+=Oxalosuccinate+NADPH+H+'
'm334'	'Triiodothyronine'				'985'	'Isocitrate+NADP+=Oxalosuccinate+NADPH+H+'
'm335'	'3,3''-diiodo-L-thyronine'				'986'	'Isocitrate=cis-Aconitate+H2O'
'm336'	'gama-carboxyethyl-hydroxychroman'				'987'	'Isocitrate=cis-Aconitate+H2O'
'm337'	'gama-carboxyethyl-hydroxychroman'				'988'	'Isocitrate=cis-Aconitate+H2O'
'm338'	'UDP-glucuronate'				'989'	'Isocitrate=cis-Aconitate+H2O'
'm339'	'S-Adenosyl-L-methionine'				'990'	'L-Arabitol+NAD+=L-Xylulose+NADH'
'm340'	'ADP-ribose'				'991'	'Xylitol+NADP+=L-Xylulose+NADPH'
'm341'	'ADP-ribose'				'995'	'Sphingosine+ATP=Sphingosine 1-phosphate+ADP'
'm342'	'UDP-glucose'				'996'	'Thiosulfate+Hydrogen cyanide=Sulfite+Thiocyanate'
'm343'	'UDP-glucose'				'997'	'2-Oxoadipate+CoA+NAD+=Glutaryl-CoA+CO2+NADH+H+'
'm344'	'UDP-glucose'				'998'	'L-2-Aminoadipate+2-Oxoglutarate=2-Oxoadipate+L-Glutamate'
'm345'	'UDP-D-galactose'				'999'	'2-Oxoadipate+Lipoamide=S-Glutaryldihydrolipoamide+CO2'
'm346'	'UDP-D-galactose'				'1002'	'L-Kynurenine+2-Oxoglutarate ST = LT 4-(2-Aminophenyl)-2,4-dioxobutanoate+L-Glutamate'
'm347'	'UDP-D-galactose'				'1010'	'ITP+D-Glucosamine=IDP+D-Glucosamine 6-phosphate'
'm348'	'trans,trans-Farnesyl diphosphate'				'1012'	'dATP+D-Glucosamine=dADP+D-Glucosamine 6-phosphate'
'm349'	'trans,trans-Farnesyl diphosphate'				'1015'	'dGMP+H2O=Deoxyguanosine+Orthophosphate'
'm350'	'3''-carboxy-alpha-chromanol'				'1019'	'Deoxyguanosine+Orthophosphate=Guanine+2-Deoxy-D-ribose1-phosphate'
'm351'	'3''-carboxy-alpha-chromanol'				'1020'	'Deoxyguanosine+Orthophosphate=Guanine+2-Deoxy-D-ribose1-phosphate'
'm352'	'3''-carboxy-alpha-chromanol'				'1021'	'(S)-3-Hydroxybutanoyl-CoA+NAD+=Acetoacetyl-CoA+NADH'
'm353'	'GDP-4-dehydro-6-deoxy-D-mannose'				'1024'	'4-Aminobutanal+NADP++H2O=4-Aminobutanoate+NADPH'
'm354'	'8(R)-hydroxy-hexadeca-2E,4E,6E,10Z-tetraenoate'				'1025'	'4-Aminobutanal+NADP++H2O=4-Aminobutanoate+NADPH'
'm355'	'8(S)-hydroxy-hexadeca-2E,4E,6E,10Z-tetraenoate'				'1031'	'Geranyl diphosphate+Isopentenyl diphosphate=Pyrophosphate +trans,trans-Farnesyl diphosphate'
'm356'	'3-Carboxy-1-hydroxypropyl-ThPP'				'1032'	'Thioredoxin+NADP+=Oxidized thioredoxin+NADPH+H+'
'm357'	'GDP-L-fucose'				'1033'	'Thioredoxin+NADP+=Oxidized thioredoxin+NADPH+H+'
'm358'	'GDP-L-fucose'				'1034'	'Thioredoxin+NADP+=Oxidized thioredoxin+NADPH+H+'
'm359'	'GDP-mannose'				'1035'	'dADP+Oxidized thioredoxin+H2O=Thioredoxin+ADP (reversible)'
'm360'	'10,11-epoxy-(4Z,7Z)-hexadecadienoic acid'				'1037'	'dADP+Oxidized thioredoxin+H2O=Thioredoxin+ADP'
'm361'	'8(R)-hydroxy-hexadeca-2E,6E,10Z-trienoate'				'1038'	'dUDP+Oxidized thioredoxin+H2O=Thioredoxin+UDP'
'm362'	'8(R)-hydroxy-hexadeca-4E,6E,10Z-trienoate'				'1039'	'dUDP+Oxidized thioredoxin+H2O=Thioredoxin+UDP'
'm363'	'8(S)-hydroxy-hexadeca-2E,6E,10Z-trienoate'				'1040'	'dGDP+Oxidized thioredoxin+H2O=GDP+Thioredoxin (reversible)'
'm364'	'8(S)-hydroxy-hexadeca-4E,6E-10Z-trienoate'				'1041'	'dGDP+Oxidized thioredoxin+H2O=GDP+Thioredoxin'
'm365'	'3-oxo-8(R)-hydroxy-hexadeca-6E,10Z-dienoate'				'1043'	'dCDP+Oxidized thioredoxin+H2O=Thioredoxin+CDP (reversible)'
'm366'	'3-oxo-8(S)-hydroxy-hexadeca-6E,10Z-dienoate'				'1044'	'dCDP+Oxidized thioredoxin+H2O=Thioredoxin+CDP'
'm367'	'3(S),8(R)-dihydroxy-6E,10Z-hexadecadienoate'				'1047'	'D-Glucono-1,5-lactone 6-phosphate+H2O=6-Phospho-D-gluconate'
'm368'	'3(S),8(S)-dihydroxy-6E,10Z-hexadecadienoate'				'1048'	'D-Glucono-1,5-lactone 6-phosphate+H2O=6-Phospho-D-gluconate'
'm369'	'palmitoleate'				'1050'	'3-Hydroxy-2-methylpropanoate+NAD+=2-Methyl-3-oxopropanoate +NADH'
'm370'	'palmitoleate'				'1053'	'Phosphatidylethanolamine+H2O=Ethanolamine+Phosphatidate'
'm371'	'palmitoleate'				'1056'	'Phosphatidylethanolamine+H2O=Ethanolamine+Phosphatidate'
'm372'	'palmitoleate'				'1057'	'Phosphatidylethanolamine+H2O ST = LT 1-Acyl-sn-glycero-3-phosphoethanolamine+Fatty acid'
'm373'	'Hexadecanal'				'1058'	'Phosphatidylethanolamine+H2O ST = LT 1-Acyl-sn-glycero-3-phosphoethanolamine+Fatty acid'
'm374'	'Hexadecanoic acid'				'1059'	'Phosphatidylethanolamine+H2O ST = LT 1-Acyl-sn-glycero-3-phosphoethanolamine+Fatty acid'
'm375'	'Hexadecanoic acid'				'1060'	'Phosphatidylethanolamine+H2O ST = LT 1-Acyl-sn-glycero-3-phosphoethanolamine+Fatty acid'
'm376'	'Riboflavin'				'1061'	'Phosphatidylserine=Phosphatidylethanolamine+CO2'
'm377'	'Riboflavin'				'1068'	'trans,trans-Farnesyl diphosphate+Isopentenyl diphosphate ST = LT Pyrophosphate+Geranylgeranyl diphosphate'
'm378'	'FMN'				'1076'	'3,4-Dihydroxy-L-phenylalanine=4-(2-Aminoethyl)-1,2-benzenediol +CO2'
'm379'	'FMN'				'1077'	'(R)-Mevalonate+CoA+2 NADP+ ST = LT (S)-3-Hydroxy-3-methylglutaryl-CoA+2 NADPH (reversible)'
'm380'	'12-oxo-(5Z,8Z,10E)-heptadecatrienoic acid'				'1078'	'(R)-Mevalonate+CoA+2 NADP+ ST = LT (S)-3-Hydroxy-3-methylglutaryl-CoA+2 NADPH'
'm381'	'Digalactosyl-diacylglycerol'				'1080'	'(S)-3-Hydroxy-3-methylglutaryl-CoA=3-Methylglutaconyl-CoA+H2O'
'm382'	'UDP-N-acetyl-D-glucosamine'				'1082'	'dAMP+H2O=Deoxyadenosine+Orthophosphate'
'm383'	'UDP-N-acetyl-D-glucosamine'				'1083'	'dAMP+H2O=Deoxyadenosine+Orthophosphate'
'm384'	'UDP-N-acetyl-D-glucosamine'				'1089'	'dTDP+H2O=dTMP+Orthophosphate'
'm385'	'UDP-N-acetyl-D-galactosamine'				'1090'	'dTDP+H2O=dTMP+Orthophosphate'
'm386'	'12S-HHT'				'1091'	'dTDP+H2O=dTMP+Orthophosphate'
'm387'	'6-(alpha-D-Glucosaminyl)-1-phosphatidyl-1D-myo-inositol'				'1093'	'dTDP+H2O=dTMP+Orthophosphate'
'm388'	'6-(alpha-D-Glucosaminyl)-1-phosphatidyl-1D-myo-inositol'				'1096'	'ATP+dTDP=ADP+dTTP'
'm389'	'estrone-3,4-quinone'				'1097'	'ATP+dTMP=ADP+dTDP'
'm390'	'estrone-3,4-quinone'				'1099'	'dTTP+H2O=dTDP+Orthophosphate'
'm391'	'estrone-3,4-quinone'				'1100'	'dTTP+H2O=dTDP+Orthophosphate'
'm392'	'estrone-3,4-semiquinone'				'1101'	'dTTP+H2O=dTDP+Orthophosphate'
'm393'	'estrone-3,4-semiquinone'				'1102'	'dTTP+H2O=dTDP+Orthophosphate'
'm394'	'estrone-2,3-semiquinone'				'1111'	'dUMP+5,10-Methylenetetrahydrofolate=Dihydrofolate+dTMP'
'm395'	'estrone-2,3-semiquinone'				'1117'	'Starch+H2O=Dextrin+Starch'
'm396'	'Estrone'				'1124'	'Retinal+NAD++H2O=Retinoate+NADH (reversible)'
'm397'	'Estrone'				'1129'	'1H-Imidazole-4-ethanamine+Oxygen+H2O ST = LT Imidazole-4-acetaldehyde+NH3+H2O2'
'm398'	'Estrone'				'1132'	'Ubiquinone+Succinate=Ubiquinol+Fumarate'
'm399'	'2-Hydroxyestrone'				'1133'	'Ubiquinone+Succinate=Ubiquinol+Fumarate'
'm400'	'2-Hydroxyestrone'				'1135'	'Ubiquinol=Ubiquinone+2 H+'
'm401'	'16alpha-Hydroxyestrone'				'1138'	'Tryptamine+H2O+Oxygen=Indole-3-acetaldehyde+NH3+H2O2'
'm402'	'4-hydroxyestrone'				'1139'	'Tryptamine+H2O+Oxygen=Indole-3-acetaldehyde+NH3+H2O2'
'm403'	'4-hydroxyestrone'				'1149'	'L-Isoleucine+2-Oxoglutarate=(S)-3-Methyl-2-oxopentanoic acid +L-Glutamate'
'm404'	'17beta-estradiol-3,4-quinone'				'1151'	'L-Pipecolate+NAD+=delta1-Piperideine-2-carboxylate+NADH+H+ (reversible)'
'm405'	'17beta-estradiol-3,4-quinone'				'1153'	'L-Pipecolate+Oxygen=2,3,4,5-Tetrahydropyridine-2-carboxylate +H2O2'
'm406'	'17beta-estradiol-3,4-quinone'				'1178'	'Stearoyl-CoA+Reduced acceptor+Oxygen=Oleoyl-CoA+Acceptor +2 H2O'
'm407'	'17beta-estradiol-3,4-semiquinone'				'1183'	'Phosphatidate+H2O=1,2-Diacyl-sn-glycerol+Orthophosphate'
'm408'	'17beta-estradiol-3,4-semiquinone'				'1184'	'Phosphatidate+H2O=1,2-Diacyl-sn-glycerol+Orthophosphate'
'm409'	'17beta-estradiol-2,3-semiquinone'				'1185'	'Phosphatidate+H2O=1,2-Diacyl-sn-glycerol+Orthophosphate'
'm410'	'17beta-estradiol-2,3-semiquinone'				'1187'	'ATP+1,2-Diacyl-sn-glycerol=ADP+Phosphatidate'
'm411'	'Estrone 3-sulfate'				'1189'	'Phosphatidate+CoA=1-Acyl-sn-glycerol 3-phosphate+Acyl-CoA'
'm412'	'Estrone 3-sulfate'				'1190'	'Phosphatidate+CoA=1-Acyl-sn-glycerol 3-phosphate+Acyl-CoA'
'm413'	'Estrone 3-sulfate'				'1191'	'Phosphatidate+CoA=1-Acyl-sn-glycerol 3-phosphate+Acyl-CoA'
'm414'	'5-S-glutathionyl-aminochrome reduced'				'1197'	'Triacylglycerol+H2O=1,2-Diacyl-sn-glycerol+Fatty acid'
'm415'	'Estradiol'				'1204'	'Prostaglandin H2 ST = LT (5Z,13E)-(15S)-9alpha,15-Dihydroxy-11-oxoprosta-5,13-dienoate'
'm416'	'Estradiol'				'1205'	'Prostaglandin H2 ST = LT (5Z,13E)-(15S)-9alpha,15-Dihydroxy-11-oxoprosta-5,13-dienoate'
'm417'	'Estriol'				'1206'	'Prostaglandin H2 ST = LT (5Z,13E)-(15S)-9alpha,15-Dihydroxy-11-oxoprosta-5,13-dienoate'
'm418'	'2-Hydroxyestradiol'				'1207'	'Prostaglandin H2=Prostaglandin I2'
'm419'	'2-Hydroxyestradiol'				'1208'	'Prostaglandin H2=Prostaglandin I2'
'm420'	'2-Hydroxyestradiol'				'1211'	'2-Amino-3-oxoadipate=5-Aminolevulinate+CO2'
'm421'	'4-hydroxy-17beta-estradiol'				'1213'	'4-Imidazolone-5-propanoate+H2O=N-Formimino-L-glutamate'
'm422'	'4-hydroxy-17beta-estradiol'				'1219'	'5-Formyltetrahydrofolate=5,10-Methenyltetrahydrofolate+H2O'
'm423'	'omega-carboxy-trinor-leukotriene B4'				'1220'	'ATP+5-Formyltetrahydrofolate=ADP+Orthophosphate +5,10-Methenyltetrahydrofolate'
'm424'	'omega-carboxy-trinor-leukotriene B4'				'1223'	'5-Formiminotetrahydrofolate=5,10-Methenyltetrahydrofolate+NH3'
'm425'	'omega-carboxy-trinor-leukotriene B4'				'1225'	'N6-(L-1,3-Dicarboxypropyl)-L-lysine+NAD++H2O=L-Glutamate +L-2-Aminoadipate 6-semialdehyde+NADH+H+'
'm426'	'5-S-glutathionyl-dopamine'				'1226'	'Nicotinamide D-ribonucleotide+H2O=N-Ribosylnicotinamide +Orthophosphate'
'm427'	'3-oxo-10(R)-hydroxy-octadeca-6E,8E,12Z-trienoate'				'1231'	'ATP+dCDP=ADP+dCTP'
'm428'	'3-oxo-10(R)-hydroxy-octadeca-6E,8E,12Z-trienoate'				'1235'	'ATP+dUDP=ADP+dUTP'
'm429'	'3-oxo-10(R)-hydroxy-octadeca-6E,8E,12Z-trienoate'				'1241'	'Estradiol-17beta+NAD+=Estrone+NADH+H+ (reversible)'
'm430'	'3-oxo-10(S)-hydroxy-octadeca-6E,8E,12Z-trienoate'				'1242'	'Estradiol-17beta+NAD+=Estrone+NADH+H+'
'm431'	'3-oxo-10(S)-hydroxy-octadeca-6E,8E,12Z-trienoate'				'1244'	'Estradiol-17beta+NADP+=Estrone+NADPH+H+'
'm432'	'3-oxo-10(S)-hydroxy-octadeca-6E,8E,12Z-trienoate'				'1251'	'dCTP+Cytidine=dCDP+CMP'
'm433'	'12,13-epoxy-(6Z,9Z)-octadecadienoic acid'				'1254'	'Tyramine+H2O+Oxygen=4-Hydroxyphenylacetaldehyde+NH3+H2O2'
'm434'	'3(S),10(R)-OH-octadeca-6-trans-4,12-cis-trienoate'				'1255'	'Tyramine+H2O+Oxygen=4-Hydroxyphenylacetaldehyde+NH3+H2O2'
'm435'	'3(S),10(R)-OH-octadeca-6-trans-4,12-cis-trienoate'				'1256'	'Tyramine+H2O+Oxygen=4-Hydroxyphenylacetaldehyde+NH3+H2O2'
'm436'	'3(S),10(R)-OH-octadeca-6-trans-4,12-cis-trienoate'				'1285'	'3-Sulfino-L-alanine=Hypotaurine+CO2'
'm437'	'(6Z,9Z,12Z)-Octadecatrienoic acid'				'1286'	'3-Sulfino-L-alanine=Hypotaurine+CO2'
'm438'	'(9Z,12Z,15Z)-Octadecatrienoic acid'				'1293'	'Androsterone+NADP+=5alpha-Androstane-3,17-dione+NADPH (reversible)'
'm439'	'9-hydroxyoctadecadienoate'				'1300'	'Deoxyuridine+Orthophosphate=Uracil+2-Deoxy-D-ribose1-phosphate'
'm440'	'9-hydroxyoctadecadienoate'				'1303'	'Deoxycytidine+H2O=Deoxyuridine+NH3'
'm441'	'9-hydroxyoctadecadienoate'				'1326'	'(R)-S-Lactoylglutathione=Glutathione+Methylglyoxal'
'm442'	'Raffinose'				'1328'	'Lactaldehyde+NAD+=Methylglyoxal+NADH+H+'
'm443'	'Maltotriose'				'1329'	'L-Noradrenaline+H2O+Oxygen=3,4-Dihydroxymandelaldehyde+NH3+ H2O2'
'm444'	'D-Gal alpha 1-_LT_6D-Gal alpha 1-_LT_6D-Glucose'				'1339'	'Sphingomyelin+H2O=N-Acylsphingosine+Choline phosphate'
'm445'	'Linoleate'				'1341'	'Sphingomyelin+H2O=N-Acylsphingosine+Choline phosphate'
'm446'	'Linoleate'				'1343'	'4-Aminobutanal+NAD++H2O=4-Aminobutanoate+NADH+H+'
'm447'	'Linoleate'				'1344'	'4-Aminobutanal+NAD++H2O=4-Aminobutanoate+NADH+H+'
'm448'	'Linoleate'				'1347'	'Deoxyadenosine+Orthophosphate=Adenine+2-Deoxy-D-ribose1-phosphate'
'm449'	'9(10)-EpOME'				'1351'	'Acetyl-CoA+Dihydrolipoamide=CoA+S-Acetyldihydrolipoamide'
'm450'	'12(13)-EpOME'				'1353'	'Succinyl-CoA+Dihydrolipoamide=CoA+S-Succinyldihydrolipoamide'
'm451'	'9(S)-HPODE'				'1354'	'Glutaryl-CoA+Dihydrolipoamide=CoA+S-Glutaryldihydrolipoamide (reversible)'
'm452'	'9,10-hydroxyoctadec-12(Z)-enoate'				'1355'	'Glutaryl-CoA+Dihydrolipoamide=CoA+S-Glutaryldihydrolipoamide'
'm453'	'12,13-hydroxyoctadec-9(Z)-enoate'				'1357'	'Propane-1,2-diol+NADP+=Lactaldehyde+NADPH+H+'
'm454'	'(9Z)-Octadecenoic acid'				'1358'	'Prostaglandin E2+NAD+ ST = LT (5Z,13E)-11alpha-Hydroxy-9,15-dioxoprost-13-enoate+NADH'
'm455'	'Octadecanoic acid'				'1359'	'Prostaglandin F2alpha+NADP+=Prostaglandin E2+NADPH+H+'
'm456'	'Octadecanoic acid'				'1361'	'ATP+Protein tyrosine=ADP+Protein tyrosine phosphate'
'm457'	'Octadecanoic acid'				'1362'	'ATP+Protein tyrosine=ADP+Protein tyrosine phosphate'
'm458'	'Sphingosine'				'1363'	'ATP+Protein tyrosine=ADP+Protein tyrosine phosphate'
'm459'	'Sphingosine'				'1364'	'Protein tyrosine phosphate+H2O=Protein tyrosine +Orthophosphate'
'm460'	'Sphingosine'				'1365'	'Protein tyrosine phosphate+H2O=Protein tyrosine +Orthophosphate'
'm461'	'Sphingosine'				'1367'	'Protein tyrosine phosphate+H2O=Protein tyrosine +Orthophosphate'
'm462'	'Sphingosine'				'1379'	'Phenethylamine+Oxygen+H2O=Phenylacetaldehyde+NH3+H2O2'
'm463'	'3-Dehydrosphinganine'				'1383'	'3-Sulfino-L-alanine+2-Oxoglutarate=3-Sulfinylpyruvate +Glutamate'
'm464'	'3-Dehydrosphinganine'				'1384'	'3-Sulfino-L-alanine+2-Oxoglutarate=3-Sulfinylpyruvate +Glutamate'
'm465'	'3-Dehydrosphinganine'				'1391'	'2-Methylpropanoyl-CoA+Oxygen=2-Methylprop-2-enoyl-CoA+2 H2O'
'm466'	'Sphingosine 1-phosphate'				'1392'	'2-Methylpropanoyl-CoA+FAD=2-Methylprop-2-enoyl-CoA+FADH2 (reversible)'
'm467'	'Sphingosine 1-phosphate'				'1396'	'Indole-3-acetaldehyde+NAD++H2O=Indole-3-acetate+NADH+H+'
'm468'	'Sphingosine 1-phosphate'				'1399'	'1,2-Diacyl-sn-glycerol+H2O=Acylglycerol+Fatty acid'
'm469'	'Sphinganine'				'1400'	'1,2-Diacyl-sn-glycerol+H2O=Acylglycerol+Fatty acid'
'm470'	'Sphinganine'				'1402'	'1,2-Diacyl-sn-glycerol+H2O=2-Acylglycerol+Fatty acid'
'm471'	'Sphinganine'				'1412'	'Xanthosine 5''-phosphate+H2O=Xanthosine+Orthophosphate'
'm472'	'Sphinganine'				'1426'	'alpha-D-Glucose 6-phosphate=beta-D-Glucose 6-phosphate'
'm473'	'Sphinganine'				'1429'	'alpha-D-Glucose 6-phosphate=beta-D-Fructose 6-phosphate'
'm474'	'Sphinganine 1-phosphate'				'1431'	'1-Acyl-sn-glycero-3-phosphocholine+H2O ST = LT sn-glycero-3-Phosphocholine+Fatty acid'
'm475'	'Sphinganine 1-phosphate'				'1438'	'Deoxyinosine+Orthophosphate=Hypoxanthine+2-Deoxy-D-ribose1-phosphate'
'm476'	'Sphinganine 1-phosphate'				'1441'	'2,3-Dehydroacyl-CoA+1-Acyl-sn-glycerol 3-phosphate=CoA +Phosphatidate'
'm477'	'Dihydrofolate'				'1443'	'(R)-2-Methyl-3-oxopropanoyl-CoA=(S)-2-Methyl-3-oxopropanoyl-CoA'
'm478'	'Tetrahydrofolate'				'1447'	'N-Acylneuraminate 9-phosphate+Orthophosphate ST = LT N-Acyl-D-mannosamine 6-phosphate+Phosphoenolpyruvate+H2O'
'm479'	'Tetrahydrofolate'				'1455'	'Betaine+L-Homocysteine=N,N-Dimethylglycine+L-Methionine'
'm480'	'5-S-glutathionyl-L-DOPA'				'1477'	'ATP+D-Sorbitol=ADP+Sorbitol 6-phosphate'
'm481'	'5-S-glutathionyl-adrenochrome hydroquinone'				'1479'	'ITP+D-Sorbitol=IDP+Sorbitol 6-phosphate'
'm482'	'13E-tetranor-16-carboxy-LTE4'				'1481'	'dATP+D-Sorbitol=dADP+Sorbitol 6-phosphate'
'm483'	'Androstenedione'				'1483'	'S-Adenosylmethioninamine+Spermidine=5''-Methylthioadenosine +Spermine'
'm484'	'Androstenedione'				'1485'	'Presqualene diphosphate+NADPH+H+=Pyrophosphate+Squalene +NADP+'
'm485'	'omega-COOH-tetranor-LTE3'				'1486'	'Squalene+Oxygen+NADPH+H+=(S)-2,3-Epoxysqualene+NADP+ +H2O'
'm486'	'5''-carboxy-alpha-chromanol'				'1495'	'3-(2-Aminoethyl)-1H-indol-5-ol+H2O+Oxygen ST = LT 5-Hydroxyindoleacetaldehyde+NH3+H2O2'
'm487'	'5''-carboxy-alpha-chromanol'				'1499'	'4-Imidazolone-5-propanoate=Urocanate+H2O (reversible)'
'm488'	'Testosterone'				'1502'	'L-Adrenaline+H2O+Oxygen=3,4-Dihydroxymandelaldehyde +Methylamine+H2O2'
'm489'	'Testosterone'				'1503'	'L-Adrenaline+H2O+Oxygen=3,4-Dihydroxymandelaldehyde +Methylamine+H2O2'
'm490'	'5alpha-Androstane-3,17-dione'				'1508'	'Melibiitol+H2O=D-Sorbitol+D-Galactose'
'm491'	'Dehydroepiandrosterone'				'1522'	'ATP+Sphinganine=ADP+Sphinganine 1-phosphate'
'm492'	'Dehydroepiandrosterone sulfate'				'1524'	'Sphinganine+NADP+=3-Dehydrosphinganine+NADPH+H+'
'm493'	'Dehydroepiandrosterone sulfate'				'1525'	'Sphinganine+NADP+=3-Dehydrosphinganine+NADPH+H+'
'm494'	'6-(_ST_i_LT_N_ST_/i_LT_-acetyl-D-glucosaminyl)-1-phosphatidyl-1D-myo-inositol'				'1527'	'Deamino-NAD++H2O=AMP+Nicotinate D-ribonucleotide'
'm495'	'Androsterone'				'1528'	'Deamino-NAD++H2O=AMP+Nicotinate D-ribonucleotide'
'm496'	'N-Acylsphingosine'				'1529'	'Deamino-NAD++H2O=AMP+Nicotinate D-ribonucleotide'
'm497'	'N-Acylsphingosine'				'1530'	'ATP+Nicotinate D-ribonucleotide=Pyrophosphate+Deamino-NAD+'
'm498'	'N-Acylsphingosine'				'1531'	'ATP+Nicotinate D-ribonucleotide=Pyrophosphate+Deamino-NAD+'
'm499'	'N-Acylsphingosine'				'1533'	'ATP+Pantothenate=ADP+D-4''-Phosphopantothenate'
'm500'	'N-Acylsphingosine'				'1539'	'(S)-3-Hydroxybutanoyl-CoA=Crotonoyl-CoA+H2O'
'm501'	'Ceramide 1-phosphate'				'1540'	'(R)-3-Hydroxybutanoyl-CoA=Crotonoyl-CoA+H2O'
'm502'	'Ceramide 1-phosphate'				'1541'	'ATP+Pantetheine 4''-phosphate=Pyrophosphate+Dephospho-CoA'
'm503'	'Ceramide 1-phosphate'				'1542'	'Dephospho-CoA+H2O=Pantetheine 4''-phosphate+AMP'
'm504'	'Ceramide 1-phosphate'				'1546'	'3-Hydroxypropionyl-CoA=Propenoyl-CoA+H2O'
'm505'	'pristanate'				'1549'	'Leukotriene A4+H2O=Leukotriene B4'
'm506'	'pristanate'				'1550'	'5(S)-HPETE=Leukotriene A4+H2O'
'm507'	'(2S,6R,10R)-pristanate'				'1551'	'5(S)-HPETE=Leukotriene A4+H2O'
'm508'	'Dihydroceramide'				'1552'	'Leukotriene A4+Glutathione=Leukotriene C4+H2O'
'm509'	'Dihydroceramide'				'1560'	'L-2-Aminoadipate 6-semialdehyde+NADP++H2O=L-2-Aminoadipate +NADPH+H+'
'm510'	'Dihydroceramide'				'1563'	'Mercaptopyruvate+Sulfite=H2S2O3+Pyruvate'
'm511'	'Dihydroceramide'				'1575'	'Hydroxymethylbilane=Uroporphyrinogen III+H2O'
'm512'	'2(S)-pristanal'				'1578'	'2-Methylbutanoyl-CoA+Oxygen=2-Methylbut-2-enoyl-CoA+2 H2O'
'm513'	'2(R)-pristanal'				'1580'	'2-Methylbutanoyl-CoA+FAD=2-Methylbut-2-enoyl-CoA+FADH2'
'm514'	'Benzo[a]pyrene-9,10-oxide'				'1586'	'5-Formyltetrahydrofolate+L-Glutamate=Tetrahydrofolate +N-Formyl-L-glutamate'
'm515'	'Benzo[a]pyrene-9,10-oxide'				'1589'	'(S)-2,3-Epoxysqualene=Lanosterol'
'm516'	'Benzo[a]pyrene-7,8-oxide'				'1591'	'Coproporphyrinogen III+Oxygen=Protoporphyrinogen IX+2 CO2 +2 H2O'
'm517'	'Benzo[a]pyrene-7,8-oxide'				'1593'	'2 Protoporphyrinogen IX+3 Oxygen=2 Protoporphyrin+6 H2O'
'm518'	'Benzo[a]pyrene-4,5-oxide'				'1607'	'4-Trimethylammoniobutanal+NAD++H2O ST = LT 4-Trimethylammoniobutanoate+NADH+H+'
'm519'	'Benzo[a]pyrene-4,5-oxide'				'1608'	'4-Trimethylammoniobutanal+NAD++H2O ST = LT 4-Trimethylammoniobutanoate+NADH+H+'
'm520'	'Benzo[a]pyrene-7,8-diol'				'1609'	'4-Trimethylammoniobutanal+Glycine ST = LT 3-Hydroxy-N6,N6,N6-trimethyl-L-lysine'
'm521'	'Benzo[a]pyrene-7,8-diol'				'1610'	'4-Trimethylammoniobutanal+Glycine ST = LT 3-Hydroxy-N6,N6,N6-trimethyl-L-lysine'
'm522'	'5,10-Methenyltetrahydrofolate'				'1615'	'trans-4-Hydroxy-L-proline+FAD ST = LT L-1-Pyrroline-3-hydroxy-5-carboxylate+FADH2'
'm523'	'5,10-Methenyltetrahydrofolate'				'1624'	'Cholesta-5,7-dien-3beta-ol=Vitamin D3 (reversible)'
'm524'	'5,10-Methenyltetrahydrofolate'				'1628'	'3-Carboxy-1-hydroxypropyl-ThPP+Lipoamide ST = LT S-Succinyldihydrolipoamide+Thiamin diphosphate'
'm525'	'5,10-Methylenetetrahydrofolate'				'1631'	'beta-D-Glucose 6-phosphate=beta-D-Fructose 6-phosphate'
'm526'	'5,10-Methylenetetrahydrofolate'				'1645'	'3-(4-Hydroxyphenyl)pyruvate ST = LT 2-Hydroxy-3-(4-hydroxyphenyl)propenoate'
'm527'	'10-Formyltetrahydrofolate'				'1648'	'Nicotinate D-ribonucleotide+H2O=Nicotinate D-ribonucleoside +Orthophosphate'
'm528'	'10-Formyltetrahydrofolate'				'1653'	'beta-D-Galactosyl-1,4-beta-D-glucosylceramide+H2O ST = LT Glucosylceramide+beta-D-Galactose'
'm529'	'5-Formyltetrahydrofolate'				'1655'	'beta-D-Galactosyl-1,4-beta-D-glucosylceramide+H2O ST = LT Glucosylceramide+beta-D-Galactose'
'm530'	'5-Formyltetrahydrofolate'				'1656'	'ATP+1-Phosphatidyl-D-myo-inositol=ADP +1-Phosphatidyl-1D-myo-inositol 4-phosphate'
'm531'	'5-Formyltetrahydrofolate'				'1657'	'ATP+1-Phosphatidyl-D-myo-inositol=ADP +1-Phosphatidyl-1D-myo-inositol 4-phosphate'
'm532'	'5-Formiminotetrahydrofolate'				'1659'	'ATP+1-Phosphatidyl-D-myo-inositol=ADP +1-Phosphatidyl-1D-myo-inositol 4-phosphate'
'm533'	'5-Formiminotetrahydrofolate'				'1660'	'ATP+1-Phosphatidyl-D-myo-inositol=ADP +1-Phosphatidyl-1D-myo-inositol 3-phosphate'
'm534'	'(1R)-Hydroxy-(2R)-glutathionyl-1,2-dihydronaphthalene'				'1661'	'ATP+1-Phosphatidyl-D-myo-inositol=ADP +1-Phosphatidyl-1D-myo-inositol 3-phosphate'
'm535'	'(1R)-Hydroxy-(2R)-glutathionyl-1,2-dihydronaphthalene'				'1665'	'(S)-Methylmalonate semialdehyde+CoA+NAD+ ST = LT (R)-2-Methyl-3-oxopropanoyl-CoA+NADH'
'm536'	'(1R)-Hydroxy-(2R)-glutathionyl-1,2-dihydronaphthalene'				'1666'	'1D-myo-Inositol 1,4-bisphosphate+H2O=myo-Inositol 4-phosphate+ Orthophosphate'
'm537'	'(1S)-Hydroxy-(2S)-glutathionyl-1,2-dihydronaphthalene'				'1675'	'1-Acyl-sn-glycero-3-phosphoethanolamine+H2O=Fatty acid +sn-glycero-3-Phosphoethanolamine'
'm538'	'(1S)-Hydroxy-(2S)-glutathionyl-1,2-dihydronaphthalene'				'1684'	'Glycine+Lipoylprotein=S-Aminomethyldihydrolipoylprotein+CO2'
'm539'	'(1R)-Glutathionyl-(2R)-hydroxy-1,2-dihydronaphthalene'				'1690'	'ATP+D-myo-Inositol 1,4,5-trisphosphate=ADP+1D-myo-Inositol1,3,4,5-tetrakisphosphate'
'm540'	'(1R)-Glutathionyl-(2R)-hydroxy-1,2-dihydronaphthalene'				'1692'	'1D-myo-Inositol 1,3,4,5-tetrakisphosphate+H2O=D-myo-Inositol1,4,5-trisphosphate+Orthophosphate'
'm541'	'12-oxo-20-carboxy-leukotriene B4'				'1693'	'1-Phosphatidyl-D-myo-inositol 4,5-bisphosphate+H2O ST = LT D-myo-Inositol 1,4,5-trisphosphate+1,2-Diacyl-sn-glycerol'
'm542'	'5-oxo-EPE'				'1694'	'1-Phosphatidyl-D-myo-inositol 4,5-bisphosphate+H2O ST = LT D-myo-Inositol 1,4,5-trisphosphate+1,2-Diacyl-sn-glycerol'
'm543'	'Retinal'				'1695'	'1-Phosphatidyl-D-myo-inositol 4,5-bisphosphate+H2O ST = LT D-myo-Inositol 1,4,5-trisphosphate+1,2-Diacyl-sn-glycerol'
'm544'	'Retinoate'				'1696'	'1-Phosphatidyl-D-myo-inositol 4,5-bisphosphate+H2O ST = LT D-myo-Inositol 1,4,5-trisphosphate+1,2-Diacyl-sn-glycerol'
'm545'	'Retinoate'				'1697'	'ATP+[Pyruvate dehydrogenase (lipoamide)]=ADP+[Pyruvatedehydrogenase (lipoamide)] phosphate'
'm546'	'20-carboxy-leukotriene-B4'				'1699'	'[Pyruvate dehydrogenase (lipoamide)] phosphate+H2O=[Pyruvatedehydrogenase (lipoamide)]+Orthophosphate'
'm547'	'20-carboxy-leukotriene-B4'				'1701'	'ATP+1-Phosphatidyl-1D-myo-inositol 4-phosphate=ADP +1-Phosphatidyl-D-myo-inositol 4,5-bisphosphate'
'm548'	'20-carboxy-leukotriene-B4'				'1702'	'ATP+1-Phosphatidyl-1D-myo-inositol 4-phosphate=ADP +1-Phosphatidyl-D-myo-inositol 4,5-bisphosphate'
'm549'	'20-carboxy-leukotriene-B4'				'1704'	'ATP+1-Phosphatidyl-1D-myo-inositol 4-phosphate=ADP +1-Phosphatidyl-D-myo-inositol 4,5-bisphosphate'
'm550'	'12-oxo-10,11-dihydro-20-COOH-LTB4'				'1709'	'UDP-D-galactose+Lactosylceramide=UDP+Globotriaosylceramide'
'm551'	'timnodonate'				'1739'	'Calcidiol+Oxygen+NADPH=Calcitriol+NADP++H2O'
'm552'	'timnodonate'				'1740'	'3-beta-D-Galactosyl-sn-glycerol+H2O=Galactose+Glycerol'
'm553'	'5-oxo-(6E,8Z,11Z,14Z)-eicosatetraenoic acid'				'1744'	'Galactosylceramide+H2O=beta-D-Galactose+N-Acylsphingosine'
'm554'	'15(R)-HEPE'				'1750'	'ATP+Phytanate+CoA=AMP+Pyrophosphate+Phytanoyl-CoA'
'm555'	'5-HEPE'				'1759'	'Stachyose+H2O=Raffinose+D-Galactose'
'm556'	'5-HEPE'				'1806'	'Lanosterol+Oxygen+NADPH+H+=14-Demethyllanosterol+Formate+ NADP+'
'm557'	'11R-HEPE'				'1810'	'Chlordecone alcohol+NADP+=Chlordecone+NADPH (reversible)'
'm558'	'18R-HEPE'				'1811'	'Choloyl-CoA+Glycine=CoA+Glycocholate'
'm559'	'5(S),6(S)-epoxy-15(S)-hydroxy-7E,9E,11Z,13E-eicosatetraenoic acid anion'				'1812'	'Choloyl-CoA+Glycine=CoA+Glycocholate'
'm560'	'5(S),6(S)-epoxy-15(S)-hydroxy-7E,9E,11Z,13E-eicosatetraenoic acid anion'				'1813'	'Propanoyl-CoA+Choloyl-CoA=CoA +3alpha,7alpha,12alpha-Trihydroxy-5beta-24-oxocholestanoyl-CoA'
'm561'	'delta12-Prostaglandin J2'				'1814'	'Choloyl-CoA+Taurine=CoA+Taurocholate'
'm562'	'delta12-Prostaglandin J2'				'1819'	'Octanoyl-CoA+NADP+=trans-Oct-2-enoyl-CoA+NADPH+H+'
'm563'	'12-oxo-leukotriene B4'				'1820'	'Octanoyl-CoA+FAD=trans-Oct-2-enoyl-CoA+FADH2'
'm564'	'12-oxo-leukotriene B4'				'1821'	'Octanoyl-CoA+Acetyl-CoA=CoA+3-Oxodecanoyl-CoA'
'm565'	'12-oxo-leukotriene B4'				'1830'	'Linoleoyl-CoA+Reduced acceptor+Oxygen=gamma-Linolenoyl-CoA +Acceptor+2 H2O'
'm566'	'5-oxo-6-trans-leukotriene B4'				'1831'	'Linoleoyl-CoA+Reduced acceptor+Oxygen=gamma-Linolenoyl-CoA +Acceptor+2 H2O'
'm567'	'5-oxo-6-trans-leukotriene B4'				'1833'	'Dihydrolipoylprotein+NADP+=Lipoylprotein+NADPH'
'm568'	'5-oxo-6-trans-leukotriene B4'				'1844'	'Lauroyl-CoA+NADP+=2-trans-Dodecenoyl-CoA+NADPH+H+'
'm569'	'5-oxo-6-trans-leukotriene B4'				'1845'	'Lauroyl-CoA+FAD=2-trans-Dodecenoyl-CoA+FADH2'
'm570'	'5-oxo-6E-12-epi-LTB4'				'1846'	'Lauroyl-CoA+Acetyl-CoA=CoA+3-Oxotetradecanoyl-CoA'
'm571'	'5-hydroperoxy-EPA'				'1851'	'Leukotriene C4+H2O=Leukotriene D4+Glutamate'
'm572'	'15(R)-hydroperoxy-EPE'				'1852'	'(S)-Methylmalonate semialdehyde+NAD++H2O=Methylmalonate +NADH'
'm573'	'5-oxo-12(S)-hydroxy-eicosa-6E,8Z,10E,14Z-tetraenoate'				'1853'	'(S)-Methylmalonate semialdehyde+NAD++H2O=Methylmalonate +NADH'
'm574'	'20-oxo-leukotriene B4'				'1884'	'Estrone 3-sulfate+H2O=Sulfate+Estrone'
'm575'	'20-oxo-leukotriene B4'				'1886'	'Estrone 3-sulfate+H2O=Sulfate+Estrone'
'm576'	'20-oxo-leukotriene B4'				'1893'	'Tetradecanoyl-CoA+NADP+=trans-Tetradec-2-enoyl-CoA+NADPH +H+'
'm577'	'12-oxo-20-hydroxy-leukotriene B4'				'1894'	'Tetradecanoyl-CoA+FAD=trans-Tetradec-2-enoyl-CoA+FADH2'
'm578'	'15-oxo-lipoxin A4'				'1895'	'Tetradecanoyl-CoA+Acetyl-CoA=CoA+3-Oxopalmitoyl-CoA'
'm579'	'PGH3'				'1901'	'3''-Phosphoadenylyl sulfate+Galactosylceramide=Adenosine3'',5''-bisphosphate+Sulfatide'
'm580'	'12-oxo-20-dihydroxy-leukotriene B4'				'1902'	'3''-Phosphoadenylyl sulfate+Galactosylceramide=Adenosine3'',5''-bisphosphate+Sulfatide'
'm581'	'11-dehydro-15-keto-TXB2'				'1907'	'Digalactosylceramide+H2O=Galactosylceramide+Galactose'
'm582'	'12-oxo-20-trihydroxy-leukotriene B4'				'1908'	'Digalactosylceramide+H2O=Galactosylceramide+Galactose'
'm583'	'Leukotriene A4'				'1909'	'Digalactosylceramide+H2O=Galactosylceramide+Galactose'
'm584'	'Leukotriene A4'				'1910'	'N-Acetylputrescine+H2O+Oxygen=N4-Acetylaminobutanal+NH3 +H2O2'
'm585'	'Prostaglandin A2'				'1911'	'N-Acetylputrescine+H2O+Oxygen=N4-Acetylaminobutanal+NH3 +H2O2'
'm586'	'Prostaglandin A2'				'1920'	'Imidazole-4-acetaldehyde+NAD++H2O=Imidazole-4-acetate+NADH+ H+'
'm587'	'Prostaglandin B2'				'1921'	'Imidazole-4-acetaldehyde+NAD++H2O=Imidazole-4-acetate+NADH+ H+'
'm588'	'Prostaglandin C2'				'1927'	'1-Methylnicotinamide+2 Oxygen+2 H2O ST = LT N1-Methyl-4-pyridone-5-carboxamide +N1-Methyl-2-pyridone-5-carboxamide+2 H2O2'
'm589'	'Prostaglandin J2'				'1928'	'3-Methylbutanoyl-CoA+FAD=3-Methylcrotonyl-CoA+FADH2'
'm590'	'11-peroxy-5Z,8Z,12E,14Z-eicosatetraenoate'				'1929'	'3-Methylbutanoyl-CoA+Acceptor=3-Methylcrotonyl-CoA+Reducedacceptor (reversible)'
'm591'	'(5Z,13E)-11alpha-Hydroxy-9,15-dioxoprost-13-enoate'				'1934'	'Tetrahydrofolate+S-Aminomethyldihydrolipoylprotein ST = LT 5,10-Methylenetetrahydrofolate+NH3+Dihydrolipoylprotein'
'm592'	'20-COOH-10,11-dihydro-LTB4'				'1935'	'3-Hydroxyisovaleryl-CoA=3-Methylcrotonyl-CoA+H2O (reversible)'
'm593'	'20-COOH-10,11-dihydro-LTB4'				'1940'	'(S)-3-Hydroxydodecanoyl-CoA=2-trans-Dodecenoyl-CoA+H2O'
'm594'	'CMP-N-acetylneuraminate'				'1941'	'3-Hydroxy-L-kynurenine+2-Oxoglutarate ST = LT 4-(2-Amino-3-hydroxyphenyl)-2,4-dioxobutanoate+L-Glutamate'
'm595'	'CMP-N-acetylneuraminate'				'1952'	'H2O+Globoside=N-Acetyl-D-galactosamine+Globotriaosylceramide'
'm596'	'12-hydroxyeicosatetraenoate'				'1958'	'(2S,3S)-3-Hydroxy-2-methylbutanoyl-CoA+NAD+ ST = LT 2-Methylacetoacetyl-CoA+NADH'
'm597'	'11-hydroxyeicosatetraenoate'				'1959'	'(2S,3S)-3-Hydroxy-2-methylbutanoyl-CoA=2-Methylbut-2-enoyl-CoA +H2O'
'm598'	'15(R)-Hydroxy-(5Z,8Z,11Z,13E)-eicosatetraenoate'				'1967'	'2-Methylprop-2-enoyl-CoA+H2O=(S)-3-Hydroxyisobutyryl-CoA'
'm599'	'8-hydroxyeicosatetraenoate'				'1981'	'Peptidylproline (omega=180)=Peptidylproline (omega=0)'
'm600'	'13-HETE'				'1988'	'2-Amino-4-hydroxy-6-(erythro-1,2,3-trihydroxypropyl)dihydropteridinetriphosphate+H2O=6-Pyruvoyltetrahydropterin+Triphosphate'
'm601'	'7-HETE'				'1993'	'4-(2-Aminoethyl)-1,2-benzenediol+H2O+Oxygen ST = LT 3,4-Dihydroxyphenylacetaldehyde+NH3+H2O2'
'm602'	'10-HETE'				'1994'	'4-(2-Aminoethyl)-1,2-benzenediol+H2O+Oxygen ST = LT 3,4-Dihydroxyphenylacetaldehyde+NH3+H2O2'
'm603'	'18-HETE'				'1996'	'4-(2-Aminoethyl)-1,2-benzenediol+H2O+Oxygen ST = LT 3,4-Dihydroxyphenylacetaldehyde+NH3+H2O2'
'm604'	'17-HETE'				'2011'	'5alpha-Cholest-8-en-3beta-ol+CO2+4 H2O+3 NADP+=Methostenol+ 3 Oxygen+3 NADPH+3 H+'
'm605'	'6-trans-leukotriene B4'				'2021'	'Glycoprotein N-acetyl-D-glucosaminyl-phospho-D-mannose+H2O ST = LT N-Acetyl-D-glucosamine+Glycoprotein phospho-D-mannose (reversible)'
'm606'	'11,12-dihydroxy-5(E),7(E),9(E),14(Z)-eicosatetraenoate'				'2031'	'1-Phosphatidyl-D-myo-inositol 4,5-bisphosphate+H2O ST = LT 1-Phosphatidyl-1D-myo-inositol 4-phosphate+Orthophosphate'
'm607'	'6,7-dihydro-5-oxo-leukotriene B4'				'2036'	'Electron-transferring flavoprotein+Propanoyl-CoA=Reducedelectron-transferring flavoprotein+Propenoyl-CoA'
'm608'	'6,7-dihydro-5-oxo-leukotriene B4'				'2038'	'Reduced electron-transferring flavoprotein+Ubiquinone ST = LT Electron-transferring flavoprotein+Ubiquinol'
'm609'	'6,7-dihydro-5-oxo-leukotriene B4'				'2039'	'N-Acetylneuraminate 9-phosphate+Orthophosphate ST = LT N-Acetyl-D-mannosamine 6-phosphate+Phosphoenolpyruvate+H2O'
'm610'	'6,7-dihydro-5-oxo-leukotriene B4'				'2040'	'L-1-Pyrroline-3-hydroxy-5-carboxylate+NAD++2 H2O ST = LT L-erythro-4-Hydroxyglutamate+NADH+H+'
'm611'	'6,7-dihydro-5-oxo-12-epi-LTB4'				'2041'	'L-1-Pyrroline-3-hydroxy-5-carboxylate+NADP++2 H2O ST = LT L-erythro-4-Hydroxyglutamate+NADPH+H+'
'm612'	'6,7-dihydro-5-oxo-12-epi-LTB4'				'2046'	'ATP+5''-Phosphoribosyl-N-formylglycinamide+L-Glutamine+H2O ST = LT ADP+Orthophosphate +2-(Formamido)-N1-(5''-phosphoribosyl)acetamidine+L-Glutamate'
'm613'	'6,7-dihydro-5-oxo-12-epi-LTB4'				'2048'	'Digalactosyl-diacylglycerol+H2O ST = LT 1,2-Diacyl-3-beta-D-galactosyl-sn-glycerol+Galactose'
'm614'	'6,7-dihydro-5-oxo-12-epi-LTB4'				'2052'	'3beta-Hydroxy-4beta-methyl-5alpha-cholest-7-ene-4alpha-carboxylate +NAD+=4alpha-Methyl-5alpha-cholest-7-en-3-one+CO2+NADH'
'm615'	'10,11-dihydro-12-oxo-LTB4'				'2055'	'UDP-N-acetyl-D-glucosamine+Lactosylceramide=UDP+Lc3Cer'
'm616'	'10,11-dihydro-12-oxo-LTB4'				'2056'	'UDP-N-acetyl-D-glucosamine +N-Acetyl-D-glucosaminyldiphosphodolichol=UDP +N,N''-Chitobiosyldiphosphodolichol'
'm617'	'10,11-dihydro-12-oxo-LTB4'				'2062'	'GDP-D-mannose+N,N''-Chitobiosyldiphosphodolichol=GDP+G00003'
'm618'	'9-deoxy-delta12-PGD2'				'2064'	'3alpha,7alpha-Dihydroxy-5beta-cholestan-26-al+NAD++H2O ST = LT 3alpha,7alpha-Dihydroxy-5beta-cholestanate+NADH+H+'
'm619'	'5,12-DiHETE'				'2065'	'3alpha,7alpha-Dihydroxy-5beta-cholestan-26-al+NAD++H2O ST = LT 3alpha,7alpha-Dihydroxy-5beta-cholestanate+NADH+H+'
'm620'	'14,15-DiHETE'				'2066'	'3alpha,7alpha-Dihydroxy-5beta-cholestan-26-al+NAD++H2O ST = LT 3alpha,7alpha-Dihydroxy-5beta-cholestanate+NADH+H+'
'm621'	'13,14-dihydro-15-oxo-lipoxin A4'				'2069'	'Phosphatidylinositol-3,4,5-trisphosphate+H2O ST = LT 1-Phosphatidyl-D-myo-inositol 4,5-bisphosphate+Orthophosphate'
'm622'	'15-oxo-PGE1'				'2080'	'ATP+1-Phosphatidyl-D-myo-inositol 4,5-bisphosphate=ADP +Phosphatidylinositol-3,4,5-trisphosphate'
'm623'	'11-dehydrothromboxane B2'				'2081'	'Propanoyl-CoA+Chenodeoxycholoyl-CoA=CoA +3alpha,7alpha-Dihydroxy-5beta-cholestanoyl-CoA'
'm624'	'20-dihydroxyleukotriene B4'				'2082'	'Alprostadil+NADP+ ST = LT (13E)-11alpha-Hydroxy-9,15-dioxoprost-13-enoate+NADPH'
'm625'	'9,11-cycloperoxy-15-hydroperoxy-5Z,13E-eicosadienoate'				'2085'	'1-(5''-Phosphoribosyl)-5-amino-4-(N-succinocarboxamide)-imidazole ST = LT Fumarate+1-(5''-Phosphoribosyl)-5-amino-4-imidazolecarboxamide (reversible)'
'm626'	'11-dehydro-13,14-dihydro-15-oxo-TXB2'				'2102'	'GM2+H2O=GM3+N-Acetyl-D-galactosamine'
'm627'	'20-trihydroxy-leukotriene-B4'				'2104'	'CMP-N-acetylneuraminate+T antigen=CMP+G00026 (reversible)'
'm628'	'20-trihydroxy-leukotriene-B4'				'2107'	'ATP+1-(5-Phospho-D-ribosyl)-5-amino-4-imidazolecarboxylate +L-Aspartate=ADP+Orthophosphate +1-(5''-Phosphoribosyl)-5-amino-4-(N-succinocarboxamide)-imidazole'
'm629'	'Glutathione disulfide'				'2116'	'GM1+H2O=GM2+Galactose'
'm630'	'Glutathione disulfide'				'2131'	'14-Demethyllanosterol+6 Oxygen+6 NADPH+6 H+=Zymosterol+2CO2+8 H2O+6 NADP+'
'm631'	'(5Z,8Z,11Z,14Z)-Icosatetraenoic acid'				'2132'	'14-Demethyllanosterol+6 Oxygen+6 NADPH+6 H+=Zymosterol+2CO2+8 H2O+6 NADP+'
'm632'	'(5Z,8Z,11Z,14Z)-Icosatetraenoic acid'				'2133'	'4alpha-Methylcholesta-8-en-3beta-ol=Methostenol'
'm633'	'(5Z,8Z,11Z,14Z)-Icosatetraenoic acid'				'2138'	'N-Methylhistamine+H2O+Oxygen=Methylimidazole acetaldehyde +NH3+H2O2'
'm634'	'(15S)-15-Hydroxy-5,8,11-cis-13-trans-eicosatetraenoate'				'2141'	'17alpha,20alpha-Dihydroxycholesterol+NADPH+H++Oxygen ST = LT 17alpha-Hydroxypregnenolone+4-Methylpentanal+NADP++H2O'
'm635'	'5(S)-HETE'				'2142'	'17alpha,20alpha-Dihydroxycholesterol+NADPH+H++Oxygen ST = LT 17alpha-Hydroxypregnenolone+4-Methylpentanal+NADP++H2O'
'm636'	'5(S)-HETE'				'2150'	'Estriol+NAD+=16alpha-Hydroxyestrone+NADH+H+'
'm637'	'19(S)-HETE'				'2152'	'Estriol+NADP+=16alpha-Hydroxyestrone+NADPH+H+'
'm638'	'5,6-EET'				'2169'	'(S)-3-Hydroxyhexadecanoyl-CoA+NAD+=3-Oxopalmitoyl-CoA+NADH'
'm639'	'5,6-EET'				'2170'	'(S)-3-Hydroxyhexadecanoyl-CoA=trans-Hexadec-2-enoyl-CoA+H2O'
'm640'	'5,6-EET'				'2171'	'(S)-3-Hydroxytetradecanoyl-CoA+NAD+=3-Oxotetradecanoyl-CoA +NADH'
'm641'	'8,9-EET'				'2172'	'(S)-3-Hydroxytetradecanoyl-CoA=trans-Tetradec-2-enoyl-CoA+H2O'
'm642'	'8,9-EET'				'2173'	'(S)-3-Hydroxydodecanoyl-CoA+NAD+=3-Oxododecanoyl-CoA+NADH'
'm643'	'8,9-EET'				'2174'	'Decanoyl-CoA+Acetyl-CoA=CoA+3-Oxododecanoyl-CoA'
'm644'	'11,12-EET'				'2175'	'(S)-Hydroxydecanoyl-CoA+NAD+=3-Oxodecanoyl-CoA+NADH'
'm645'	'11,12-EET'				'2176'	'(S)-Hydroxydecanoyl-CoA=trans-Dec-2-enoyl-CoA+H2O (reversible)'
'm646'	'11,12-EET'				'2177'	'(S)-Hydroxyoctanoyl-CoA+NAD+=3-Oxooctanoyl-CoA+NADH'
'm647'	'14,15-EET'				'2178'	'(S)-Hydroxyoctanoyl-CoA=trans-Oct-2-enoyl-CoA+H2O'
'm648'	'14,15-EET'				'2179'	'Hexanoyl-CoA+Acetyl-CoA=CoA+3-Oxooctanoyl-CoA'
'm649'	'14,15-EET'				'2180'	'(S)-Hydroxyhexanoyl-CoA+NAD+=3-Oxohexanoyl-CoA+NADH'
'm650'	'16(R)-HETE'				'2181'	'(S)-Hydroxyhexanoyl-CoA=trans-Hex-2-enoyl-CoA+H2O'
'm651'	'9(S)-HETE'				'2182'	'Hexanoyl-CoA+FAD=trans-Hex-2-enoyl-CoA+FADH2'
'm652'	'Leukotriene B4'				'2183'	'Decanoyl-CoA+NADP+=trans-Dec-2-enoyl-CoA+NADPH+H+'
'm653'	'(13E)-(15S)-15-Hydroxy-9-oxoprosta-10,13-dienoate'				'2184'	'Decanoyl-CoA+FAD=trans-Dec-2-enoyl-CoA+FADH2'
'm654'	'(13E)-(15S)-15-Hydroxy-9-oxoprosta-10,13-dienoate'				'2192'	'ATP+beta-D-Fructose 6-phosphate=ADP+beta-D-Fructose1,6-bisphosphate'
'm655'	'(5Z,9E,14Z)-(8xi,11R,12S)-11,12-Epoxy-8-hydroxyicosa-5,9,14-trienoic acid'				'2197'	'Zymosterol=5alpha-Cholesta-7,24-dien-3beta-ol'
'm656'	'(5Z,9E,14Z)-(8xi,11R,12S)-11,12-Epoxy-8-hydroxyicosa-5,9,14-trienoic acid'				'2198'	'Zymosterol=5alpha-Cholesta-7,24-dien-3beta-ol'
'm657'	'5(S)-HPETE'				'2205'	'Propanoyl-CoA+Chenodeoxyglycocholoyl-CoA=CoA +3alpha,7alpha-Dihydroxy-5beta-24-oxocholestanoyl-CoA'
'm658'	'5(S)-HPETE'				'2207'	'3alpha,7alpha-Dihydroxy-5beta-cholestane+NAD+ ST = LT 7alpha-Hydroxy-5beta-cholestan-3-one+NADH+H+ (reversible)'
'm659'	'12(S)-HPETE'				'2244'	'20alpha-Hydroxycholesterol+NADPH+H++Oxygen ST = LT 17alpha,20alpha-Dihydroxycholesterol+NADP++H2O'
'm660'	'15(S)-HPETE'				'2278'	'3-Methoxytyramine+H2O+Oxygen ST = LT 3-Methoxy-4-hydroxyphenylacetaldehyde+H2O2+NH3'
'm661'	'15(S)-HPETE'				'2279'	'3-Methoxy-4-hydroxyphenylglycolaldehyde+NAD++H2O ST = LT 3-Methoxy-4-hydroxymandelate+NADH+H+'
'm662'	'15H-11,12-EETA'				'2280'	'3-Methoxy-4-hydroxyphenylglycolaldehyde+NAD++H2O ST = LT 3-Methoxy-4-hydroxymandelate+NADH+H+'
'm663'	'11H-14,15-EETA'				'2282'	'3-Methoxy-4-hydroxyphenylglycolaldehyde+NADP++H2O ST = LT 3-Methoxy-4-hydroxymandelate+NADPH+H+'
'm664'	'Prostaglandin H2'				'2283'	'L-Normetanephrine+H2O+Oxygen ST = LT 3-Methoxy-4-hydroxyphenylglycolaldehyde+NH3+H2O2'
'm665'	'Prostaglandin H2'				'2284'	'L-Normetanephrine+H2O+Oxygen ST = LT 3-Methoxy-4-hydroxyphenylglycolaldehyde+NH3+H2O2'
'm666'	'Prostaglandin H2'				'2286'	'L-Metanephrine+H2O+Oxygen ST = LT 3-Methoxy-4-hydroxyphenylglycolaldehyde+H2O2+Methylamine'
'm667'	'Prostaglandin E2'				'2287'	'5-Hydroxyindoleacetaldehyde+NAD++H2O=5-Hydroxyindoleacetate+ H++NADH'
'm668'	'Prostaglandin E2'				'2324'	'Uroporphyrinogen I=Coproporphyrinogen I+4 CO2'
'm669'	'Prostaglandin D2'				'2325'	'Bilirubin beta-diglucuronide+2 H2O+6 H+=D-Urobilinogen+2D-Glucuronate'
'm670'	'Prostaglandin D2'				'2329'	'GDP-D-mannose+G00003=GDP+G00004'
'm671'	'Prostaglandin D2'				'2340'	'N4-Acetylaminobutanal+NAD++H2O=4-Acetamidobutanoate+NADH +H+'
'm672'	'Prostaglandin I2'				'2341'	'N4-Acetylaminobutanal+NAD++H2O=4-Acetamidobutanoate+NADH +H+'
'm673'	'Prostaglandin I2'				'2343'	'L-erythro-4-Hydroxyglutamate+NAD+=L-4-Hydroxyglutamatesemialdehyde+NADH+H2O'
'm674'	'Thromboxane A2'				'2345'	'L-erythro-4-Hydroxyglutamate+2-Oxoglutarate ST = LT D-4-Hydroxy-2-oxoglutarate+L-Glutamate'
'm675'	'Thromboxane A2'				'2346'	'(S)-3-Hydroxyisobutyryl-CoA+H2O=CoA+(S)-3-Hydroxyisobutyrate (reversible)'
'm676'	'(13E)-11alpha-Hydroxy-9,15-dioxoprost-13-enoate'				'2347'	'(S)-3-Hydroxyisobutyrate+NAD+=(S)-Methylmalonate semialdehyde+ NADH+H+'
'm677'	'20-OH-Leukotriene B4'				'2349'	'3''-Phosphoadenylyl sulfate+Digalactosylceramide=Adenosine3'',5''-bisphosphate+Digalactosylceramidesulfate'
'm678'	'Lipoxin A4'				'2350'	'3''-Phosphoadenylyl sulfate+Digalactosylceramide=Adenosine3'',5''-bisphosphate+Digalactosylceramidesulfate'
'm679'	'Lipoxin A4'				'2371'	'Diacylglycerol+H2O=Acylglycerol+Carboxylate'
'm680'	'Lipoxin B4'				'2383'	'4,8,12-Trimethyltridecanoyl-CoA+Propanoyl-CoA ST = LT 3-Oxopristanoyl-CoA+CoA'
'm681'	'Lipoxin B4'				'2390'	'Parathion+H2O=Diethylthiophosphoric acid+4-Nitrophenol'
'm682'	'Prostaglandin G2'				'2392'	'Paraoxon+H2O=Diethylphosphoric acid+4-Nitrophenol'
'm683'	'ganglioside GM4'				'2394'	'D-Gal alpha 1- LT 6D-Gal alpha 1- LT 6D-Glucose+H2O=D-Galactose +Melibiose'
'm684'	'12-HETrE'				'2398'	'trans,trans-Farnesyl diphosphate+Isopentenyl diphosphate ST = LT trans,trans,cis-Geranylgeranyl diphosphate+Pyrophosphate'
'm685'	'10,11-dihydro-leukotriene B4'				'2399'	'trans,trans,cis-Geranylgeranyl diphosphate+Isopentenyl diphosphate ST = LT Dehydrodolichol diphosphate+Pyrophosphate'
'm686'	'10,11-dihydro-leukotriene B4'				'2408'	'Crotonoyl-CoA+H2O=3-Hydroxybutanoyl-CoA'
'm687'	'10,11-dihydro-leukotriene B4'				'2412'	'14-Demethyllanosterol+NADP+ ST = LT 4,4-Dimethyl-5alpha-cholesta-8,14,24-trien-3beta-ol+NADPH+H+'
'm688'	'10,11-dihydro-leukotriene B4'				'2413'	'14-Demethyllanosterol+NADP+ ST = LT 4,4-Dimethyl-5alpha-cholesta-8,14,24-trien-3beta-ol+NADPH+H+'
'm689'	'10,11-dihydro-12-epi-leukotriene B4'				'2418'	'Phytanoyl-CoA+2-Oxoglutarate+Oxygen=2-Hydroxyphytanoyl-CoA +Succinate+CO2'
'm690'	'10,11-dihydro-12-epi-leukotriene B4'				'2433'	'5-PP-InsP5+H2O=myo-Inositol hexakisphosphate+Orthophosphate'
'm691'	'6,7-dihydro-12-epi-LTB4'				'2435'	'ATP+1-Phosphatidyl-1D-myo-inositol 4-phosphate=ADP +1-Phosphatidyl-1D-myo-inositol 3,4-bisphosphate'
'm692'	'6,7-dihydro-12-epi-LTB4'				'2441'	'ATP+myo-Inositol hexakisphosphate=ADP+1-Diphosinositolpentakisphosphate'
'm693'	'6,7-dihydro-leukotriene B4'				'2446'	'ADP+D-Glucose=AMP+D-Glucose 6-phosphate (reversible)'
'm694'	'6,7-dihydro-leukotriene B4'				'2454'	'UDP-N-acetyl-D-galactosamine+Protein serine=UDP+Tn antigen'
'm695'	'13,14-dihydro- lipoxin A4'				'2473'	'UDP-D-xylose+Protein serine=UDP+G00154'
'm696'	'prostaglandin H1'				'2474'	'UDP-D-galactose+G00154=UDP+G00155'
'm697'	'13,14-dihydro-15-oxo-PGE1'				'2476'	'UDP-D-galactose+G00155=UDP+G00156'
'm698'	'prostaglandin G1'				'2489'	'CMP-N-acetylneuraminate+GD3=CMP+GT3'
'm699'	'5,6-DHET'				'2502'	'H2O+Globotriaosylceramide=alpha-D-Galactose+Lactosylceramide'
'm700'	'5,6-DHET'				'2503'	'H2O+Globotriaosylceramide=alpha-D-Galactose+Lactosylceramide'
'm701'	'8,9-DHET'				'2504'	'H2O+Globotriaosylceramide=alpha-D-Galactose+Lactosylceramide'
'm702'	'8,9-DHET'				'2505'	'H2O+Globotriaosylceramide=alpha-D-Galactose+Lactosylceramide'
'm703'	'11,12-DHET'				'2514'	'UDP-N-acetyl-D-glucosamine+nLc6Cer=UDP+nLc7Cer'
'm704'	'11,12-DHET'				'2522'	'H2O+G00171=D-Glucose+G00010'
'm705'	'14,15-DHET'				'2523'	'H2O+G00171=D-Glucose+G00010'
'm706'	'14,15-DHET'				'2525'	'H2O+G00010=D-Glucose+G00011'
'm707'	'Prostaglandin F2alpha'				'2526'	'H2O+G00010=D-Glucose+G00011'
'm708'	'Prostaglandin F2alpha'				'2533'	'G00013+2 H2O=G00014+2 D-Mannose'
'm709'	'Alprostadil'				'2542'	'GDP-L-fucose+G00015=GDP+G00016'
'm710'	'(5Z,9E,14Z)-(8xi,11xi,12S)-8,11,12-Trihydroxyicosa-5,9,14-trienoate'				'2544'	'2 UDP-D-galactose+G00016=2 UDP+G00017'
'm711'	'11,12,15-THETA'				'2556'	'GDP-L-fucose+Paragloboside=GDP+IV2Fuc-nLc4Cer'
'm712'	'11,14,15-THETA'				'2564'	'GDP-L-fucose+G00057=GDP+Type IIIH glycolipid'
'm713'	'Thromboxane B2'				'2569'	'GDP-L-fucose+nLc6Cer=GDP+VI2Fuc-nLc6'
'm714'	'13,14-dihydro-PGE1'				'2577'	'GDP-L-fucose+G00073=GDP+G00074'
'm715'	'Dolichol'				'2581'	'GDP-L-fucose+VI2Fuc-nLc6=GDP+G00081 (reversible)'
'm716'	'Geranylgeranyl diphosphate'				'2589'	'G00005+GDP-D-mannose=G10526+GDP'
'm717'	'trans,trans,cis-Geranylgeranyl diphosphate'				'2590'	'G10526+GDP-D-mannose=G00006+GDP'
'm718'	'Dehydrodolichol diphosphate'				'2594'	'GDP-L-fucose+Lc4Cer=GDP+Fuc-Lc4Cer (reversible)'
'm719'	'Dolichyl phosphate'				'2597'	'GDP-L-fucose+Lc4Cer=GDP+IV2Fuc-Lc4Cer'
'm720'	'Dolichyl phosphate'				'2599'	'GDP-L-fucose+Lc4Cer=GDP+IV2Fuc-Lc4Cer'
'm721'	'arachidate'				'2615'	'UDP-D-galactose+IV2Fuc-Lc4Cer=UDP+Type IB glycolipid'
'm722'	'arachidate'				'2619'	'GDP-L-fucose+G00038=GDP+Type IB glycolipid (reversible)'
'm723'	'arachidate'				'2620'	'GDP-L-fucose+G00038=GDP+Type IB glycolipid'
'm724'	'Phytanate'				'2646'	'GDP-L-fucose+G00081=GDP+G00082 (reversible)'
'm725'	'Phytanate'				'2649'	'GDP-D-mannose+G00004=GDP+G00005'
'm726'	'Icosanoic acid'				'2650'	'Dolichyl phosphate D-mannose+G00006=Dolichyl phosphate +G10595'
'm727'	'Deamino-NAD+'				'2651'	'Dolichyl phosphate D-mannose+G00006=Dolichyl phosphate +G10595'
'm728'	'Deamino-NAD+'				'2652'	'Dolichyl phosphate D-mannose+G10595=Dolichyl phosphate +G10596'
'm729'	'Deamino-NAD+'				'2653'	'Dolichyl phosphate D-mannose+G10595=Dolichyl phosphate +G10596'
'm730'	'gama-CEHC-glucuronide'				'2654'	'Dolichyl phosphate D-mannose+G10596=Dolichyl phosphate +G10597'
'm731'	'gama-CEHC-glucuronide'				'2655'	'Dolichyl phosphate D-mannose+G10596=Dolichyl phosphate +G10597'
'm732'	'NAD+'				'2656'	'Dolichyl phosphate D-mannose+G10597=Dolichyl phosphate +G00007'
'm733'	'NAD+'				'2657'	'Dolichyl phosphate D-mannose+G10597=Dolichyl phosphate +G00007'
'm734'	'NAD+'				'2669'	'Sphingosine 1-phosphate=Ethanolamine phosphate+Hexadecanal'
'm735'	'NAD+'				'2671'	'Dihydroceramide+H2O=Fatty acid+Sphinganine'
'm736'	'NAD+'				'2672'	'Dihydroceramide+H2O=Fatty acid+Sphinganine'
'm737'	'NADH'				'2673'	'Dihydroceramide+H2O=Fatty acid+Sphinganine'
'm738'	'NADH'				'2675'	'Dihydroceramide+H2O=Fatty acid+Sphinganine'
'm739'	'NADH'				'2676'	'Sphinganine 1-phosphate+H2O=Sphinganine+Orthophosphate'
'm740'	'NADH'				'2677'	'Sphinganine 1-phosphate+H2O=Sphinganine+Orthophosphate'
'm741'	'NADH'				'2678'	'Sphinganine 1-phosphate+H2O=Sphinganine+Orthophosphate'
'm742'	'NADP+'				'2679'	'Sphingosine 1-phosphate+H2O=Sphingosine+Orthophosphate'
'm743'	'NADP+'				'2680'	'Sphingosine 1-phosphate+H2O=Sphingosine+Orthophosphate'
'm744'	'NADP+'				'2681'	'Sphingosine 1-phosphate+H2O=Sphingosine+Orthophosphate'
'm745'	'NADP+'				'2682'	'Ceramide 1-phosphate+H2O=N-Acylsphingosine+Orthophosphate'
'm746'	'NADP+'				'2683'	'Ceramide 1-phosphate+H2O=N-Acylsphingosine+Orthophosphate'
'm747'	'NADP+'				'2684'	'Ceramide 1-phosphate+H2O=N-Acylsphingosine+Orthophosphate'
'm748'	'18-carboxy-dinor-LTE4'				'2702'	'4-Hydroxyphenyl acetate+H2O=Hydroquinone+Acetate'
'm749'	'NADPH'				'2704'	'(3S)-3-Hydroxyadipyl-CoA+NAD+=3-Oxoadipyl-CoA+NADH+H+'
'm750'	'NADPH'				'2706'	'5-Carboxy-2-pentenoyl-CoA+H2O=(3S)-3-Hydroxyadipyl-CoA (reversible)'
'm751'	'NADPH'				'2709'	'trans-Hex-2-enoyl-CoA+NADPH+H+=Hexanoyl-CoA+NADP+'
'm752'	'NADPH'				'2711'	'Naphthalene+NADPH+Oxygen+H+=(1R,2S)-Naphthalene 1,2-oxide+ NADP++H2O'
'm753'	'NADPH'				'2712'	'Naphthalene+NADPH+Oxygen+H+=(1S,2R)-Naphthalene 1,2-oxide+ NADP++H2O'
'm754'	'NADPH'				'2713'	'Naphthalene+NADPH+Oxygen+H+=(1S,2R)-Naphthalene 1,2-oxide+ NADP++H2O'
'm755'	'7''-carboxy-alpha-chromanol'				'2714'	'(1R,2S)-Naphthalene 1,2-oxide+Glutathione ST = LT (1R)-Hydroxy-(2R)-glutathionyl-1,2-dihydronaphthalene'
'm756'	'7''-carboxy-alpha-chromanol'				'2715'	'(1R,2S)-Naphthalene 1,2-oxide+Glutathione ST = LT (1R)-Hydroxy-(2R)-glutathionyl-1,2-dihydronaphthalene'
'm757'	'17alpha-Hydroxypregnenolone'				'2716'	'(1R,2S)-Naphthalene 1,2-oxide+Glutathione ST = LT (1R)-Hydroxy-(2R)-glutathionyl-1,2-dihydronaphthalene (reversible)'
'm758'	'17alpha-Hydroxypregnenolone'				'2717'	'(1S,2R)-Naphthalene 1,2-oxide+Glutathione ST = LT (1R)-Glutathionyl-(2R)-hydroxy-1,2-dihydronaphthalene'
'm759'	'3-beta-D-Galactosyl-4-beta-D-galactosyl-O-beta-D-xylosylprotein'				'2718'	'(1S,2R)-Naphthalene 1,2-oxide+Glutathione ST = LT (1R)-Glutathionyl-(2R)-hydroxy-1,2-dihydronaphthalene'
'm760'	'Dephospho-CoA'				'2721'	'(1S,2R)-Naphthalene 1,2-oxide+Glutathione ST = LT (1S)-Hydroxy-(2S)-glutathionyl-1,2-dihydronaphthalene'
'm761'	'CoA'				'2729'	'(1R,2S)-Naphthalene 1,2-oxide=beta-Naphthol'
'm762'	'CoA'				'2731'	'(1R,2S)-Naphthalene 1,2-oxide+H2O ST = LT 1,2-Dihydronaphthalene-1,2-diol'
'm763'	'CoA'				'2733'	'(1R,2S)-Naphthalene 1,2-oxide+H2O ST = LT 1,2-Dihydronaphthalene-1,2-diol'
'm764'	'CoA'				'2734'	'(1S,2R)-Naphthalene 1,2-oxide+H2O ST = LT 1,2-Dihydronaphthalene-1,2-diol'
'm765'	'CoA'				'2736'	'(1S,2R)-Naphthalene 1,2-oxide+H2O ST = LT 1,2-Dihydronaphthalene-1,2-diol'
'm766'	'CoA'				'2738'	'1,2-Dihydronaphthalene-1,2-diol+NADP+=Naphthalene-1,2-diol +NADPH+H+ (reversible)'
'm767'	'CoA'				'2740'	'1,2-Dihydronaphthalene-1,2-diol+NADPH+Oxygen+H+ ST = LT 1,2-Dihydroxy-3,4-epoxy-1,2,3,4-tetrahydronaphthalene+NADP++H2O'
'm768'	'IsoGlobotriasyl ceramide'				'2745'	'beta-Naphthol+NADPH+Oxygen+H+=Naphthalene-1,2-diol+NADP++ H2O'
'm769'	'alpha-CEHC-glucuronide'				'2768'	'2 Glutathione+5(S)-HPETE=Oxidized glutathione+5(S)-HETE +H2O'
'm770'	'alpha-CEHC-glucuronide'				'2772'	'2 Glutathione+15(S)-HPETE=Oxidized glutathione +(15S)-15-Hydroxy-5,8,11-cis-13-trans-eicosatetraenoate+H2O'
'm771'	'2-(S-Glutathionyl)acetyl glutathione'				'2779'	'15(S)-HPETE=15H-11,12-EETA'
'm772'	'Acyl-CoA'				'2781'	'15(S)-HPETE=11H-14,15-EETA'
'm773'	'Acyl-CoA'				'2783'	'15H-11,12-EETA+H2O=11,12,15-THETA'
'm774'	'Acyl-CoA'				'2785'	'11H-14,15-EETA+H2O=11,14,15-THETA'
'm775'	'15-oxo-Prostaglandin E2 ethanolamide'				'2787'	'(5Z,8Z,11Z,14Z)-Icosatetraenoic acid+Oxygen+NADPH+H+ ST = LT 19(S)-HETE+NADP++H2O'
'm776'	'Formyl-CoA'				'2788'	'(5Z,8Z,11Z,14Z)-Icosatetraenoic acid+Oxygen+NADPH+H+ ST = LT 14,15-EET+NADP++H2O'
'm777'	'beta-D-Galactosyl-1,3-(N-acetyl-beta-D-glucosaminyl-1,6)-N-acetyl-D- galactosaminyl-R'				'2789'	'(5Z,8Z,11Z,14Z)-Icosatetraenoic acid+Oxygen+NADPH+H+ ST = LT 14,15-EET+NADP++H2O'
'm778'	'Anandamide'				'2790'	'(5Z,8Z,11Z,14Z)-Icosatetraenoic acid+Oxygen+NADPH+H+ ST = LT 11,12-EET+NADP++H2O'
'm779'	'Anandamide'				'2791'	'(5Z,8Z,11Z,14Z)-Icosatetraenoic acid+Oxygen+NADPH+H+ ST = LT 11,12-EET+NADP++H2O'
'm780'	'12(S)-hydroxyarachidonylethanolamide'				'2792'	'(5Z,8Z,11Z,14Z)-Icosatetraenoic acid+Oxygen+NADPH+H+ ST = LT 8,9-EET+NADP++H2O'
'm781'	'Prostaglandin E2 ethanolamide'				'2793'	'(5Z,8Z,11Z,14Z)-Icosatetraenoic acid+Oxygen+NADPH+H+ ST = LT 8,9-EET+NADP++H2O'
'm782'	'Prostaglandin E2 ethanolamide'				'2794'	'(5Z,8Z,11Z,14Z)-Icosatetraenoic acid+Oxygen+NADPH+H+ ST = LT 5,6-EET+NADP++H2O'
'm783'	'20-COOH-leukotriene E4'				'2795'	'(5Z,8Z,11Z,14Z)-Icosatetraenoic acid+Oxygen+NADPH+H+ ST = LT 5,6-EET+NADP++H2O'
'm784'	'20-oxo-leukotriene E4'				'2797'	'(5Z,8Z,11Z,14Z)-Icosatetraenoic acid+Oxygen+NADPH+H+ ST = LT 16(R)-HETE+NADP++H2O'
'm785'	'Leukotriene E4'				'2798'	'Linoleate+Oxygen+NADPH+H+=9(10)-EpOME+NADP++H2O'
'm786'	'Leukotriene E4'				'2800'	'Linoleate+Oxygen+NADPH+H+=12(13)-EpOME+NADP++H2O'
'm787'	'20-Hydroxyleukotriene E4'				'2808'	'Linoleate+Reduced acceptor+Oxygen ST = LT (6Z,9Z,12Z)-Octadecatrienoic acid+Acceptor+2 H2O'
'm788'	'1-lyso-2-arachidonoyl-phosphatidate'				'2824'	'Bromobenzene-3,4-oxide+H2O=Bromobenzene-3,4-dihydrodiol'
'm789'	'1-lyso-2-arachidonoyl-phosphatidate'				'2826'	'Bromobenzene-3,4-oxide+H2O=Bromobenzene-3,4-dihydrodiol'
'm790'	'1-lyso-2-arachidonoyl-phosphatidate'				'2843'	'Benzo[a]pyrene-7,8-oxide+H2O=Benzo[a]pyrene-7,8-diol'
'm791'	'Acetyl-CoA'				'2845'	'Benzo[a]pyrene-7,8-oxide+H2O=Benzo[a]pyrene-7,8-diol'
'm792'	'Acetyl-CoA'				'2865'	'1,1-Dichloroethylene epoxide+Glutathione ST = LT 2-(S-Glutathionyl)acetyl chloride+HCl'
'm793'	'Acetyl-CoA'				'2871'	'2-(S-Glutathionyl)acetyl chloride+Glutathione ST = LT 2-(S-Glutathionyl)acetyl glutathione+HCl'
'm794'	'Acetyl-CoA'				'2893'	'14,15-EET+H2O=14,15-DHET'
'm795'	'2-Arachidonoylglycerol'				'2895'	'14,15-EET+H2O=14,15-DHET'
'm796'	'2-Arachidonoylglycerol'				'2896'	'11,12-EET+H2O=11,12-DHET'
'm797'	'2-Arachidonoylglycerol'				'2898'	'11,12-EET+H2O=11,12-DHET'
'm798'	'12-hydroperoxyeicosatetraenoate glyceryl ester'				'2899'	'8,9-EET+H2O=8,9-DHET'
'm799'	'L-Palmitoylcarnitine'				'2901'	'8,9-EET+H2O=8,9-DHET'
'm800'	'nisinate'				'2902'	'5,6-EET+H2O=5,6-DHET'
'm801'	'2,3-Dehydroacyl-CoA'				'2904'	'5,6-EET+H2O=5,6-DHET'
'm802'	'trans-2,3-Dehydroacyl-CoA'				'2908'	'1,2-Dibromoethane+Glutathione=Glutathione episulfonium ion+2Hydrobromic acid'
'm803'	'3-Oxoacyl-CoA'				'2913'	'2-Bromoacetaldehyde+Glutathione=S-(Formylmethyl)glutathione +Hydrobromic acid'
'm804'	'9''-carboxy-alpha-chromanol'				'2924'	'G00144+H2O=6-(alpha-D-glucosaminyl)-1D-myo-inositol +Phosphatidate'
'm805'	'9''-carboxy-alpha-chromanol'				'2925'	'O(,2)+L-tyrosine+L-dopa=H(,2)O+L-dopa+Dopaquinone'
'm806'	'Propenoyl-CoA'				'2926'	'O(,2)+L-tyrosine+L-dopa=H(,2)O+L-dopa+Dopaquinone'
'm807'	'Malonyl-CoA'				'2931'	'acetyl-CoA+D-glucosamine 1-phosphate=CoA+`N`-acetyl-D-glucosamine 1-phosphate'
'm808'	'Malonyl-CoA'				'2934'	'cyanide+H(''+)+3-mercaptopyruvate=pyruvate+thiocyanate (reversible)'
'm809'	'Malonyl-CoA'				'2937'	'arachidonate+ATP+CoA=AMP+arachidonoyl-CoA+PP(,i)'
'm810'	'Malonyl-CoA'				'2938'	'H(,2)O+stearoyl-CoA=CoA+H(''+)+stearate'
'm811'	'Malonyl-CoA'				'2939'	'H(,2)O+stearoyl-CoA=CoA+H(''+)+stearate'
'm812'	'(3S)-3-Hydroxyacyl-CoA'				'2940'	'H(,2)O+stearoyl-CoA=CoA+H(''+)+stearate'
'm813'	'Propanoyl-CoA'				'2943'	'CoA+a-ketoglutarate+NAD(''+)=CO(,2)+NADH+succinyl-CoA'
'm814'	'Propanoyl-CoA'				'2944'	'CoA+a-ketoglutarate+NAD(''+)=CO(,2)+NADH+succinyl-CoA'
'm815'	'Propanoyl-CoA'				'2945'	'L-gulonate+NADP(''+)=D-glucuronate+NADPH+H(''+)'
'm816'	'3-Hydroxypropionyl-CoA'				'2949'	'a-maltose+H2O=2 alpha-D-Glucose'
'm817'	'3alpha-Hydroxy-5beta-cholanate'				'2954'	'dATP+TDP=dADP+TTP'
'm818'	'Chenodeoxycholate'				'2956'	'UTP+reduced thioredoxin=dUTP+H(,2)O+oxidized thioredoxin'
'm819'	'Chenodeoxycholate'				'2960'	'NAD(''+)+(3`S`)-3-hydroxylinoleoyl-CoA=3-oxolinoleoyl-CoA+NADH+H(''+)'
'm820'	'Chenodeoxycholate'				'2961'	'NAD(''+)+(3`S`)-3-hydroxylinoleoyl-CoA=3-oxolinoleoyl-CoA+NADH+H(''+)'
'm821'	'3alpha,12alpha-Dihydroxy-5beta-cholanate'				'2965'	'malonyl-CoA+H(''+)+stearoyl-CoA=CO(,2)+CoA+3-oxoeicosanoyl-CoA'
'm822'	'3alpha,12alpha-Dihydroxy-5beta-cholanate'				'2966'	'NADPH+H(''+)+3-oxoeicosanoyl-CoA=NADP(''+)+3-hydroxyeicosanoyl-CoA'
'm823'	'3alpha,7alpha,12alpha-Trihydroxy-5beta-cholanate'				'2967'	'3-hydroxyeicosanoyl-CoA=H(,2)O+`trans`-eicos-2-enoyl-CoA'
'm824'	'3alpha,7alpha,12alpha-Trihydroxy-5beta-cholanate'				'2968'	'NADPH+H(''+)+`trans`-eicos-2-enoyl-CoA=NADP(''+)+eicosanoyl-CoA'
'm825'	'3alpha,7alpha,12alpha-Trihydroxy-5beta-cholanate'				'2969'	'malonyl-CoA+H(''+)+eicosanoyl-CoA=CO(,2)+CoA+3-oxodocosanoyl-CoA'
'm826'	'3alpha,7alpha,12alpha-Trihydroxy-5beta-cholanate'				'2971'	'NADPH+H(''+)+3-oxodocosanoyl-CoA=NADP(''+)+3-hydroxydocosanoyl-CoA'
'm827'	'3alpha,7alpha,12alpha-Trihydroxy-5beta-cholanate'				'2972'	'3-hydroxydocosanoyl-CoA=H(,2)O+`trans`-docos-2-enoyl-CoA'
'm828'	'Stachyose'				'2973'	'NADPH+H(''+)+`trans`-docos-2-enoyl-CoA=NADP(''+)+docosanoyl-CoA'
'm829'	'Psychosine sulfate'				'2974'	'malonyl-CoA+H(''+)+docosanoyl-CoA=CO(,2)+CoA+3-oxotetracosanoyl-CoA'
'm830'	'Psychosine sulfate'				'2975'	'NADPH+H(''+)+3-oxotetracosanoyl-CoA=NADP(''+)+3-hydroxytetracosanoyl-CoA'
'm831'	'Psychosine'				'2976'	'3-hydroxytetracosanoyl-CoA=H(,2)O+`trans`-tetracos-2-enoyl-CoA'
'm832'	'Psychosine'				'2977'	'NADPH+H(''+)+`trans`-tetracos-2-enoyl-CoA=NADP(''+)+tetracosanoyl-CoA'
'm833'	'Psychosine'				'2978'	'H(,2)O+eicosanoyl-CoA=arachidate+CoA+H(''+)'
'm834'	'lignocerate'				'2979'	'H(,2)O+eicosanoyl-CoA=arachidate+CoA+H(''+)'
'm835'	'lignocerate'				'2980'	'H(,2)O+eicosanoyl-CoA=arachidate+CoA+H(''+)'
'm836'	'lignocerate'				'2984'	'H(,2)O+tetracosanoyl-CoA=CoA+H(''+)+lignocerate'
'm837'	'Sphingomyelin'				'2985'	'H(,2)O+tetracosanoyl-CoA=CoA+H(''+)+lignocerate'
'm838'	'Sphingomyelin'				'2986'	'H(,2)O+tetracosanoyl-CoA=CoA+H(''+)+lignocerate'
'm839'	'APE'				'2987'	'palmitoyl-CoA+malonyl-CoA+H(''+)=CO(,2)+CoA+3-oxooctadecanoyl-CoA'
'm840'	'(_ST_i_LT_S_ST_/i_LT_)-3-hydroxy-isobutyryl-CoA'				'2988'	'palmitoyl-CoA+malonyl-CoA+H(''+)=CO(,2)+CoA+3-oxooctadecanoyl-CoA'
'm841'	'simvastatin'				'2990'	'NADPH+H(''+)+3-oxooctadecanoyl-CoA=NADP(''+)+3-hydroxyoctadecanoyl-CoA'
'm842'	'Leukotriene D4'				'2994'	'H(,2)O+leukotriene D(,4)=glycine+leukotriene E(,4)'
'm843'	'Crotonoyl-CoA'				'2995'	'H(,2)O+O(,2)+spermine=H(,2)O(,2)+NH(,4)(''+)+spermine monoaldehyde'
'm844'	'2-Methylprop-2-enoyl-CoA'				'2998'	'H(,2)O+O(,2)+spermidine=H(,2)O(,2)+NH(,4)(''+)+H(''+)+spermidine monoaldehyde 2'
'm845'	'Acetoacetyl-CoA'				'3001'	'H(,2)O+O(,2)+H(''+)+spermidine monoaldehyde 2=H(,2)O(,2)+NH(,4)(''+)+spermidine dialdehyde'
'm846'	'Acetoacetyl-CoA'				'3010'	'H(,2)O+O(,2)+spermine monoaldehyde=H(,2)O(,2)+NH(,4)(''+)+spermine dialdehyde'
'm847'	'Succinyl-CoA'				'3013'	'H(,2)O+O(,2)+spermidine=H(,2)O(,2)+NH(,4)(''+)+spermidine monoaldehyde 1'
'm848'	'Succinyl-CoA'				'3023'	'H(,2)O+maltotriose=a-D-glucose+a-maltose'
'm849'	'(S)-Methylmalonyl-CoA'				'3024'	'2 glutathione+3,5,3'' - triiodothyronine=H(''+)+iodide+Oxidized glutathione+3,3''-diiodo-L-thyronine'
'm850'	'(S)-Methylmalonyl-CoA'				'3038'	'H(,2)O+maltotetraose=a-D-glucose+maltotriose'
'm851'	'(R)-Methylmalonyl-CoA'				'3063'	'H(,2)O+maltopentaose=a-D-glucose+maltotetraose'
'm852'	'(R)-Methylmalonyl-CoA'				'3069'	'H(,2)O+maltohexaose=a-D-glucose+maltopentaose'
'm853'	'simvastatin acid'				'3079'	'H(,2)O+maltoheptaose=a-D-glucose+maltohexaose'
'm854'	'alpha-N-Acetylneuraminyl-2,3-beta-D-galactosyl-1,3-N-acetyl-alpha-D- galactosaminyl-R'				'3081'	'2 H(,2)O+maltononaose=2 a-D-glucose+maltoheptaose'
'm855'	'alpha-N-Acetylneuraminyl-2,3-beta-D-galactosyl-1,3-N-acetyl-alpha-D- galactosaminyl-R'				'3083'	'H(,2)O+maltodecaose=a-D-glucose+maltononaose'
'm856'	'Butanoyl-CoA'				'3092'	'prostaglandin H(,2)=malonic dialdehyde+12`S`-HHT'
'm857'	'2-Methylpropanoyl-CoA'				'3093'	'H(,2)O+thromboxane A(,2)=thromboxane B(,2)'
'm858'	'2-Methylpropanoyl-CoA'				'3110'	'NADPH+O(,2)+17a-hydroxypregnenolone=acetate+dehydroepiandrosterone+H(,2)O+NADP(''+)'
'm859'	'(S)-3-Hydroxybutanoyl-CoA'				'3121'	'a-ketoglutarate+L-kynurenine=L-glutamate+H(,2)O+kynurenate+H(''+)'
'm860'	'(R)-3-Hydroxybutanoyl-CoA'				'3123'	'acetyl-CoA+spermidine=CoA+H(''+)+`N`(''1)-acetylspermidine'
'm861'	'3-Hydroxybutanoyl-CoA'				'3135'	'NADPH+O(,2)+H(''+)+vitamin D(,3)=H(,2)O+NADP(''+)+25-hydroxyvitamin D(,3)'
'm862'	'(S)-3-Hydroxyisobutyryl-CoA'				'3137'	'NADH+O(,2)+H(''+)+1a,25-dihydroxyvitamin D(,3)=H(,2)O+NAD(''+)+1a,24`R`,25-trihydroxyvitamin D(,3)'
'm863'	'all-trans-Pentaprenyl diphosphate'				'3141'	'NADPH+O(,2)+H(''+)+25-hydroxyvitamin D(,3)=H(,2)O+NADP(''+)+23`S`,25-dihydroxyvitamin D(,3)'
'm864'	'Sulfatide'				'3143'	'NADH+O(,2)+H(''+)+23`S`,25-dihydroxyvitamin D(,3)=H(,2)O+NAD(''+)+23`S`,25,26-trihydroxyvitamin D(,3)'
'm865'	'Sulfatide'				'3145'	'O(,2)+23`S`,25,26-trihydroxyvitamin D(,3)=H(,2)O(,2)+25-hydroxyvitamin D(,3)-26,23-lactol'
'm866'	'Glucosylceramide'				'3147'	'O(,2)+25-hydroxyvitamin D(,3)-26,23-lactol=H(,2)O(,2)+25-hydroxyvitamin D(,3)-26,23-lactone'
'm867'	'Glucosylceramide'				'3154'	'ATP+L-a-Phosphatidylinositol=ADP+H(''+)+1-phosphatidyl-`myo`-inositol 5-phosphate'
'm868'	'Glucosylceramide'				'3155'	'ATP+L-a-Phosphatidylinositol=ADP+H(''+)+1-phosphatidyl-`myo`-inositol 5-phosphate'
'm869'	'Galactosylceramide'				'3157'	'ATP+L-a-Phosphatidylinositol=ADP+H(''+)+1-phosphatidyl-`myo`-inositol 5-phosphate'
'm870'	'Galactosylceramide'				'3158'	'H(,2)O+1-phosphatidyl-D-`myo`-inositol 4,5-bisphosphate=Pi+1-phosphatidyl-`myo`-inositol 5-phosphate'
'm871'	'Galactosylceramide'				'3167'	'ATP+CoA+linoleate=AMP+PP(,i)+linoleoyl-CoA'
'm872'	'Galactosylceramide'				'3168'	'ATP+CoA+linoleate=AMP+PP(,i)+linoleoyl-CoA'
'm873'	'neuromedin N (1-4)'				'3169'	'UDP+reduced glutaredoxin=dUDP+H(,2)O+glutaredoxin'
'm874'	'11''-carboxy-alpha-chromanol'				'3170'	'UDP+reduced glutaredoxin=dUDP+H(,2)O+glutaredoxin'
'm875'	'11''-carboxy-alpha-chromanol'				'3171'	'FAD+linoleoyl-CoA=FADH(,2)+`trans`,`cis`,`cis`-2,9,12-octadecatrienoyl-CoA'
'm876'	'3-Methylcrotonyl-CoA'				'3172'	'FAD+linoleoyl-CoA=FADH(,2)+`trans`,`cis`,`cis`-2,9,12-octadecatrienoyl-CoA'
'm877'	'2-Methylbut-2-enoyl-CoA'				'3173'	'FAD+`cis`,`cis`-palmito-7,10-dienoyl-CoA=FADH(,2)+`trans`,`cis`,`cis`-2,7,10-hexadecatrienoyl-CoA'
'm878'	'2-Methylacetoacetyl-CoA'				'3174'	'FAD+`cis`,`cis`-palmito-7,10-dienoyl-CoA=FADH(,2)+`trans`,`cis`,`cis`-2,7,10-hexadecatrienoyl-CoA'
'm879'	'2-Methylacetoacetyl-CoA'				'3175'	'FAD+`cis`,`cis`-myristo-5,8-dienoyl-CoA=FADH(,2)+`trans`-2-`cis`,`cis`-5,8-tetradecatrienoyl-CoA'
'm880'	'2-Methylacetoacetyl-CoA'				'3176'	'FAD+`cis`,`cis`-myristo-5,8-dienoyl-CoA=FADH(,2)+`trans`-2-`cis`,`cis`-5,8-tetradecatrienoyl-CoA'
'm881'	'Glutaryl-CoA'				'3177'	'FAD+`cis`-deca-4-enoyl-CoA=FADH(,2)+`trans`,`cis`-deca-2,4-dienoyl-CoA'
'm882'	'Glutaryl-CoA'				'3178'	'FAD+`cis`-deca-4-enoyl-CoA=FADH(,2)+`trans`,`cis`-deca-2,4-dienoyl-CoA'
'm883'	'Glycolithocholate'				'3179'	'H(,2)O+`trans`,`cis`-dodeca-2,6-dienoyl-CoA=(3`S`)-3-hydroxydodec-`cis`-6-enoyl-CoA'
'm884'	'Glycochenodeoxycholate'				'3181'	'H(,2)O+`trans`-2-`cis`,`cis`-5,8-tetradecatrienoyl-CoA=3(`S`)-hydroxy-5`Z`,8`Z`-tetradecadienoyl-CoA'
'm885'	'Glycocholate'				'3182'	'H(,2)O+`trans`-2-`cis`,`cis`-5,8-tetradecatrienoyl-CoA=3(`S`)-hydroxy-5`Z`,8`Z`-tetradecadienoyl-CoA'
'm886'	'Glycocholate'				'3183'	'H(,2)O+`trans`,`cis`,`cis`-2,7,10-hexadecatrienoyl-CoA=(3`S`)-3-hydroxy-`cis`,`cis`-palmito-7,10-dienoyl-CoA'
'm887'	'2-Methylbutanoyl-CoA'				'3185'	'H(,2)O+`trans`,`cis`,`cis`-2,9,12-octadecatrienoyl-CoA=(3`S`)-3-hydroxylinoleoyl-CoA'
'm888'	'2-Methylbutanoyl-CoA'				'3188'	'NAD(''+)+(3`S`)-3-hydroxy-`cis`,`cis`-palmito-7,10-dienoyl-CoA=NADH+H(''+)+3-oxo-`cis`,`cis`-7,10-hexadecadienoyl-CoA'
'm889'	'3-Methylbutanoyl-CoA'				'3189'	'NAD(''+)+(3`S`)-3-hydroxy-`cis`,`cis`-palmito-7,10-dienoyl-CoA=NADH+H(''+)+3-oxo-`cis`,`cis`-7,10-hexadecadienoyl-CoA'
'm890'	'(2S,3S)-3-Hydroxy-2-methylbutanoyl-CoA'				'3191'	'NAD(''+)+3(`S`)-hydroxy-5`Z`,8`Z`-tetradecadienoyl-CoA=NADH+H(''+)+3-oxo-`cis`,`cis`-5,8-tetradecadienoyl-CoA'
'm891'	'(2S,3S)-3-Hydroxy-2-methylbutanoyl-CoA'				'3192'	'NAD(''+)+3(`S`)-hydroxy-5`Z`,8`Z`-tetradecadienoyl-CoA=NADH+H(''+)+3-oxo-`cis`,`cis`-5,8-tetradecadienoyl-CoA'
'm892'	'3-Hydroxyisovaleryl-CoA'				'3193'	'NAD(''+)+(3`S`)-3-hydroxydodec-`cis`-6-enoyl-CoA=3-oxolaur-6-`cis`-enoyl-CoA+NADH+H(''+)'
'm893'	'Taurolithocholate'				'3194'	'NAD(''+)+(3`S`)-3-hydroxydodec-`cis`-6-enoyl-CoA=3-oxolaur-6-`cis`-enoyl-CoA+NADH+H(''+)'
'm894'	'Taurodeoxycholate'				'3195'	'NAD(''+)+(3`S`)-3-hydroxydodec-`cis`-6-enoyl-CoA=3-oxolaur-6-`cis`-enoyl-CoA+NADH+H(''+)'
'm895'	'Taurochenodeoxycholate'				'3196'	'dGTP+2''-deoxyuridine=dGDP+dUMP+H(''+) (reversible)'
'm896'	'Taurochenodeoxycholate'				'3197'	'dGTP+2''-deoxyuridine=dGDP+dUMP+H(''+)'
'm897'	'Taurocholate'				'3198'	'CoA+3-oxolinoleoyl-CoA=acetyl-CoA+`cis`,`cis`-palmito-7,10-dienoyl-CoA'
'm898'	'Dolichyl beta-D-glucosyl phosphate'				'3199'	'CoA+3-oxolinoleoyl-CoA=acetyl-CoA+`cis`,`cis`-palmito-7,10-dienoyl-CoA'
'm899'	'Dolichyl phosphate D-mannose'				'3200'	'CoA+3-oxo-`cis`,`cis`-7,10-hexadecadienoyl-CoA=acetyl-CoA+`cis`,`cis`-myristo-5,8-dienoyl-CoA'
'm900'	'Dolichyl phosphate D-mannose'				'3201'	'CoA+3-oxo-`cis`,`cis`-7,10-hexadecadienoyl-CoA=acetyl-CoA+`cis`,`cis`-myristo-5,8-dienoyl-CoA'
'm901'	'Glucosyl-Ceramides'				'3202'	'CoA+3-oxo-`cis`,`cis`-5,8-tetradecadienoyl-CoA=acetyl-CoA+`cis`,`cis`-3,6-dodecadienoyl-CoA'
'm902'	'FAD'				'3203'	'CoA+3-oxo-`cis`,`cis`-5,8-tetradecadienoyl-CoA=acetyl-CoA+`cis`,`cis`-3,6-dodecadienoyl-CoA'
'm903'	'FAD'				'3204'	'CoA+3-oxolaur-6-`cis`-enoyl-CoA=acetyl-CoA+`cis`-deca-4-enoyl-CoA'
'm904'	'FAD'				'3205'	'CoA+3-oxolaur-6-`cis`-enoyl-CoA=acetyl-CoA+`cis`-deca-4-enoyl-CoA'
'm905'	'FAD'				'3214'	'2-oxo-6-aminocaproate=H(,2)O+H(''+)+D1-piperideine 2-carboxylate'
'm906'	'FADH2'				'3221'	'CDP+reduced glutaredoxin=dCDP+H(,2)O+glutaredoxin'
'm907'	'FADH2'				'3223'	'CDP+reduced glutaredoxin=dCDP+H(,2)O+glutaredoxin'
'm908'	'4-methyl-trans-2-pentenoyl-CoA'				'3225'	'NADPH+O(,2)+H(''+)+estrone=H(,2)O+NADP(''+)+4-hydroxyestrone'
'm909'	'3-oxo-4-methyl-pentanoyl-CoA'				'3228'	'NADPH+O(,2)+H(''+)+estrone=2-hydroxyestrone+H(,2)O+NADP(''+)'
'm910'	'25-hydroxyvitamin D3-26,23-lactone'				'3237'	'17b-estradiol+NADPH+O(,2)+H(''+)=H(,2)O+NADP(''+)+4-hydroxy-17b-estradiol'
'm911'	'4-methyl-pentanoyl-CoA'				'3245'	'cyanide+H(''+)+thiosulfate=thiocyanate+sulfite'
'm912'	'3(S)-hydroxy-4-methyl-pentanoyl-CoA'				'3246'	'H(,2)O(,2)+4-hydroxyestrone=2 H(,2)O+estrone-3,4-semiquinone'
'm913'	'3-Methylglutaconyl-CoA'				'3247'	'H(,2)O(,2)+4-hydroxyestrone=2 H(,2)O+estrone-3,4-semiquinone (reversible)'
'm914'	'5-Carboxy-2-pentenoyl-CoA'				'3248'	'2-hydroxyestrone+H(,2)O(,2)=2 H(,2)O+estrone-2,3-semiquinone'
'm915'	'25-hydroxyvitamin D3-26,23-lactol'				'3249'	'2-hydroxyestrone+H(,2)O(,2)=2 H(,2)O+estrone-2,3-semiquinone (reversible)'
'm916'	'24-oxo-1alpha,25-dihydroxyvitamin D3'				'3250'	'2-hydroxy-17b-estradiol+H(,2)O(,2)=2 H(,2)O+17b-estradiol-2,3-semiquinone'
'm917'	'24-oxo-1alpha,23,25-trihydroxyvitamin D3'				'3251'	'2-hydroxy-17b-estradiol+H(,2)O(,2)=2 H(,2)O+17b-estradiol-2,3-semiquinone'
'm918'	'trans-Hex-2-enoyl-CoA'				'3252'	'H(,2)O(,2)+4-hydroxy-17b-estradiol=2 H(,2)O+17b-estradiol-3,4-semiquinone'
'm919'	'3-Oxohexanoyl-CoA'				'3253'	'H(,2)O(,2)+4-hydroxy-17b-estradiol=2 H(,2)O+17b-estradiol-3,4-semiquinone'
'm920'	'(S)-3-Hydroxy-3-methylglutaryl-CoA'				'3255'	'O(,2)+estrone-3,4-semiquinone=superoxide radical+estrone-3,4-quinone'
'm921'	'(S)-3-Hydroxy-3-methylglutaryl-CoA'				'3257'	'O(,2)+17b-estradiol-3,4-semiquinone=superoxide radical+17b-estradiol-3,4-quinone'
'm922'	'(S)-3-Hydroxy-3-methylglutaryl-CoA'				'3263'	'5-cholestene-3b,7a-diol+NAD(''+)=NADH+H(''+)+7a-hydroxy-4-cholesten-3-one'
'm923'	'(3S)-3-Hydroxyadipyl-CoA'				'3264'	'5-cholestene-3b,7a-diol+NAD(''+)=NADH+H(''+)+7a-hydroxy-4-cholesten-3-one'
'm924'	'Cholesta-5,7-dien-3beta-ol'				'3265'	'5-cholestene-3b,7a-diol+NAD(''+)=NADH+H(''+)+7a-hydroxy-4-cholesten-3-one'
'm925'	'Cholesta-5,7-dien-3beta-ol'				'3270'	'5b-cholestane-3a,7a,27-triol+NAD(''+)=NADH+H(''+)+3a,7a-dihydroxy-5b-cholestan-27-al'
'm926'	'Zymosterol'				'3276'	'H(,2)O+NADP(''+)+3a,7a-dihydroxy-5b-cholestan-27-al=NADPH+2 H(''+)+3a,7a-dihydroxy-5b-cholestanoate'
'm927'	'Zymosterol'				'3281'	'5b-cholestane-3a,7a-diol+NADP(''+)=NADPH+3 H(''+)+7a-hydroxy-4-cholesten-3-one (reversible)'
'm928'	'5alpha-Cholesta-7,24-dien-3beta-ol'				'3292'	'glutathione+17b-estradiol-3,4-quinone=4-hydroxy-17b-estradiol-2-`S`-glutathione'
'm929'	'5alpha-Cholesta-7,24-dien-3beta-ol'				'3294'	'glutathione+17b-estradiol-3,4-quinone=4-hydroxy-17b-estradiol-2-`S`-glutathione'
'm930'	'Vitamin D3'				'3296'	'glutathione+estrone-3,4-quinone=4-hydroxyestrone-2-S-glutathione'
'm931'	'Vitamin D3'				'3298'	'glutathione+estrone-3,4-quinone=4-hydroxyestrone-2-S-glutathione'
'm932'	'Vitamin D3'				'3299'	'glutathione+12-oxo-leukotriene B(,4)=12-oxo-c-LTB(,3)'
'm933'	'5_AND_alpha;-cholesta-8-en-3-one'				'3300'	'glutathione+12-oxo-leukotriene B(,4)=12-oxo-c-LTB(,3)'
'm934'	'Calcidiol'				'3302'	'glutathione+12-oxo-leukotriene B(,4)=12-oxo-c-LTB(,3)'
'm935'	'7alpha-Hydroxycholest-4-en-3-one'				'3303'	'NADPH+H(''+)+12-oxo-c-LTB(,3)=NADP(''+)+10,11-dihydro-12`R`-hydroxy-leukotriene C(,4)'
'm936'	'7alpha-Hydroxycholest-4-en-3-one'				'3305'	'NADPH+H(''+)+12-oxo-c-LTB(,3)=NADP(''+)+10,11-dihydro-12`R`-hydroxy-leukotriene C(,4) (reversible)'
'm937'	'7alpha-Hydroxycholest-4-en-3-one'				'3308'	'5b-cholestane-3a,7a-diol+NADPH+O(,2)+H(''+)=5b-cholestane-3a,7a,27-triol+H(,2)O+NADP(''+)'
'm938'	'Calcitriol'				'3320'	'H(,2)O+choloyl-CoA=3a,7a,12a-trihydroxy-5b-cholanoic acid+CoA+H(''+)'
'm939'	'24,25-Dihydroxyvitamin D3'				'3321'	'H(,2)O+choloyl-CoA=3a,7a,12a-trihydroxy-5b-cholanoic acid+CoA+H(''+)'
'm940'	'23S,25-dihydroxyvitamin D3'				'3322'	'H(,2)O+choloyl-CoA=3a,7a,12a-trihydroxy-5b-cholanoic acid+CoA+H(''+)'
'm941'	'23S,25,26-trihydroxyvitamin D3'				'3323'	'H(,2)O+chenodeoxycholoyl-CoA=CoA+H(''+)+3a,7a-dihydroxy-5b-cholanoic acid'
'm942'	'1alpha,24R,25-trihydroxyvitamin D3'				'3324'	'H(,2)O+chenodeoxycholoyl-CoA=CoA+H(''+)+3a,7a-dihydroxy-5b-cholanoic acid'
'm943'	'calcitetrol'				'3325'	'H(,2)O+chenodeoxycholoyl-CoA=CoA+H(''+)+3a,7a-dihydroxy-5b-cholanoic acid'
'm944'	'Hexanoyl-CoA'				'3327'	'CoA+O(,2)+3a,7a-dihydroxy-5b-cholestanoyl-CoA=H(,2)O+propionyl-CoA+chenodeoxycholoyl-CoA'
'm945'	'(S)-Hydroxyhexanoyl-CoA'				'3328'	'CoA+O(,2)+3a,7a-dihydroxy-5b-cholestanoyl-CoA=H(,2)O+propionyl-CoA+chenodeoxycholoyl-CoA'
'm946'	'Cholesterol'				'3329'	'taurine+chenodeoxycholoyl-CoA=CoA+H(''+)+3a,7a-dihydroxy-5b-cholan-24-oyl-taurine'
'm947'	'Cholesterol'				'3331'	'taurine+deoxycholoyl-CoA=CoA+H(''+)+3a,12a-dihydroxy-5b-cholan-24-oyl-taurine'
'm948'	'5alpha-Cholest-7-en-3beta-ol'				'3336'	'2'',3''-cyclic UMP+H(,2)O=H(''+)+3''-UMP'
'm949'	'5alpha-Cholest-7-en-3beta-ol'				'3339'	'L-lysine+spermidine=1,3-diaminopropane+deoxyhypusine'
'm950'	'5alpha-Cholest-8-en-3beta-ol'				'3353'	'L-cysteine+Dopaquinone=5-S-cysteinyldopa'
'm951'	'cholesta-8(9)-en-3beta-ol'				'3355'	'glutathione+Dopaquinone=5-S-glutathionyl-L-DOPA'
'm952'	'cholesta-8(9)-en-3beta-ol'				'3356'	'Dopaquinone+5-S-cysteinyldopa=L-dopa+5-(S-L-cysteinyl)-dopaquinone'
'm953'	'7alpha-Hydroxycholesterol'				'3387'	'NAD(''+)+lipoxin A(,4)=NADH+H(''+)+15-oxo-lipoxin A(,4)'
'm954'	'7alpha-Hydroxycholesterol'				'3388'	'NADPH+H(''+)+15-oxo-lipoxin A(,4)=NADP(''+)+13,14-dihydro-15-oxo-lipoxin A(,4)'
'm955'	'7alpha-Hydroxycholesterol'				'3389'	'NADPH+H(''+)+13,14-dihydro-15-oxo-lipoxin A(,4)=NADP(''+)+13,14-dihydro- lipoxin A(,4)'
'm956'	'7alpha-Hydroxy-5beta-cholestan-3-one'				'3396'	'H(,2)O+anandamide=arachidonate+ethanolamine'
'm957'	'20alpha-Hydroxycholesterol'				'3397'	'2 O(,2)+reduced acceptor+anandamide=acceptor+H(,2)O+Prostaglandin E(,2) ethanolamide'
'm958'	'20alpha-Hydroxycholesterol'				'3398'	'2 O(,2)+reduced acceptor+anandamide=acceptor+H(,2)O+Prostaglandin E(,2) ethanolamide'
'm959'	'3alpha,7alpha-Dihydroxy-5beta-cholestan-26-al'				'3399'	'5-(S-L-cysteinyl)-dopaquinone=H(,2)O+H(''+)+1,4-benzothiazine-`o`-quinonimine'
'm960'	'3alpha,7alpha-Dihydroxy-5beta-cholestan-26-al'				'3400'	'5-S-cysteinyldopa+1,4-benzothiazine-`o`-quinonimine=5-(S-L-cysteinyl)-dopaquinone+3,4-dihydro-1,4-benzothiazine-3-carboxylate'
'm961'	'3alpha,7alpha-Dihydroxy-5beta-cholestan-26-al'				'3413'	'O(,2)+2-arachidonoylglycerol=12-hydroperoxyeicosatetraenoate glyceryl ester'
'm962'	'17alpha,20alpha-Dihydroxycholesterol'				'3414'	'H(,2)O+1-lyso-2-arachidonoyl-phosphatidate=Pi+2-arachidonoylglycerol (reversible)'
'm963'	'17alpha,20alpha-Dihydroxycholesterol'				'3415'	'H(,2)O+1-lyso-2-arachidonoyl-phosphatidate=Pi+2-arachidonoylglycerol (reversible)'
'm964'	'17alpha,20alpha-Dihydroxycholesterol'				'3416'	'H(,2)O+1-lyso-2-arachidonoyl-phosphatidate=Pi+2-arachidonoylglycerol (reversible)'
'm965'	'3alpha,7alpha-dihydroxy-5beta-cholestan-27-al'				'3418'	'O(,2)+reduced acceptor+anandamide=acceptor+H(,2)O+12(`S`)-hydroxyarachidonylethanolamide'
'm966'	'3alpha,7alpha-Dihydroxy-5beta-cholestanate'				'3423'	'tryptamine+formaldehyde=propionaldehyde+1,2,3,4-tetrahydroisoquinoline'
'm967'	'3alpha,7alpha-Dihydroxy-5beta-cholestanate'				'3424'	'NAD(''+)+Prostaglandin E(,2) ethanolamide=NADH+H(''+)+15-oxo-Prostaglandin E(,2) ethanolamide'
'm968'	'3alpha,7alpha-Dihydroxy-5beta-cholestanate'				'3427'	'prostaglandin E(,2)=H(,2)O+prostaglandin B(,2)'
'm969'	'3alpha,7alpha,12alpha-trihydroxy-5beta-cholestan-27-al'				'3429'	'prostaglandin E(,2)=H(,2)O+prostaglandin A(,2) (reversible)'
'm970'	'3alpha,7alpha,12alpha-trihydroxy-5beta-cholestan-27-al'				'3434'	'3a,7a,12a-trihydroxy-5b-cholanoic acid+H(,2)O+NADP(''+)=NADPH+O(,2)+H(''+)+3a,12a-dihydroxy-5b-cholanoic acid'
'm971'	'3alpha,7alpha,12alpha-trihydroxy-5beta-cholestan-27-al'				'3435'	'3a,7a,12a-trihydroxy-5b-cholanoic acid+H(,2)O+NADP(''+)=NADPH+O(,2)+H(''+)+3a,12a-dihydroxy-5b-cholanoic acid'
'm972'	'3alpha,7alpha,12alpha-Trihydroxy-5beta-cholestanoate'				'3475'	'NADPH+O(,2)+H(''+)+estrone=H(,2)O+NADP(''+)+16a-hydroxyestrone'
'm973'	'3alpha,7alpha,12alpha-Trihydroxy-5beta-cholestanoate'				'3477'	'NADPH+O(,2)+H(''+)+25-hydroxyvitamin D(,3)=H(,2)O+NADP(''+)+24,25-Dihydroxyvitamin D(,3)'
'm974'	'3alpha,7alpha,12alpha-Trihydroxy-5beta-cholestanoate'				'3483'	'12-hydroperoxyeicosatetraenoate+2 glutathione=12-hydroxyeicosatetraenoate+H(,2)O+Oxidized glutathione'
'm975'	'3alpha,7alpha-Dihydroxy-5beta-cholestane'				'3491'	'H(,2)O+kinetensin=L-leucine+kinetensin 1-8'
'm976'	'3alpha,7alpha-Dihydroxy-5beta-cholestane'				'3495'	'H(,2)O+neuromedin N=L-leucine+neuromedin N (1-4)'
'm977'	'5beta-cholestane-3alpha,7alpha,27-triol'				'3499'	'glutathione+dopamine `o`-quinone=5-S-glutathionyl-dopamine'
'm978'	'5beta-cholestane-3alpha,7alpha,12alpha,27-tetraol'				'3523'	'a-ketoglutarate+L-3-hydroxykynurenine=L-glutamate+H(,2)O+H(''+)+xanthurenate'
'm979'	'4-hydroxyestrone-2-S-glutathione'				'3533'	'2 NADPH+2 O(,2)+H(''+)+13''-hydroxy-a-tocopherol=3 H(,2)O+2 NADP(''+)+13''-carboxy-a-tocopherol'
'm980'	'4-hydroxyestrone-2-S-glutathione'				'3537'	'NADPH+O(,2)+H(''+)+`RRR`-a-tocopherol=H(,2)O+NADP(''+)+13''-hydroxy-a-tocopherol'
'm981'	'4-hydroxy-17beta-estradiol-2-S-glutathione'				'3543'	'ATP+CoA+2 H(,2)O+NAD(''+)+O(,2)+9''-carboxy-a-chromanol=AMP+H(,2)O(,2)+NADH+PP(,i)+propionyl-CoA+2 H(''+)+7''-carboxy-a-chromanol'
'm982'	'4-hydroxy-17beta-estradiol-2-S-glutathione'				'3544'	'ATP+CoA+2 H(,2)O+NAD(''+)+O(,2)+9''-carboxy-a-chromanol=AMP+H(,2)O(,2)+NADH+PP(,i)+propionyl-CoA+2 H(''+)+7''-carboxy-a-chromanol'
'm983'	'3-Keto-4-methylzymosterol'				'3545'	'ATP+CoA+2 H(,2)O+NAD(''+)+O(,2)+5''-carboxy-a-chromanol=AMP+H(,2)O(,2)+NADH+PP(,i)+propionyl-CoA+2 H(''+)+3''-carboxy-a-chromanol'
'm984'	'Cholesterol ester'				'3546'	'ATP+CoA+2 H(,2)O+NAD(''+)+O(,2)+5''-carboxy-a-chromanol=AMP+H(,2)O(,2)+NADH+PP(,i)+propionyl-CoA+2 H(''+)+3''-carboxy-a-chromanol'
'm985'	'Cholesterol ester'				'3553'	'lanosterol+NADPH+H(''+)=NADP(''+)+24,25-dihydrolanosterol'
'm986'	'4_AND_alpha;-carboxy-5_AND_alpha;-cholesta-8-en-3_AND_beta;-ol'				'3584'	'2,3-diketo-L-gulonate+H(,2)O=oxalate+H(''+)+L-threose'
'm987'	'4alpha-Methyl-5alpha-cholest-7-en-3-one'				'3585'	'Cl(''-)+H(,2)O(,2)=H(,2)O+hypochlorite'
'm988'	'4alpha-Methylzymosterol'				'3596'	'glutathione+adrenochrome=5-`S`-glutathionyl-adrenochrome hydroquinone'
'm989'	'4_AND_alpha;-formyl-5_AND_alpha;-cholesta-8-en-3_AND_beta;-ol'				'3602'	'glutathione+dopaminochrome=5-`S`-glutathionyl-aminochrome reduced'
'm990'	'4alpha-Methylcholesta-8-en-3beta-ol'				'3605'	'phosphoadenosinephosphosulfate+dopamine=adenosine 3'',5''-bisphosphate+H(''+)+dopamine sulfate'
'm991'	'Methostenol'				'3606'	'H(,2)O+g-CEHC-glucuronide=D-glucuronate+H(''+)+g-carboxyethyl-hydroxychroman'
'm992'	'4_AND_alpha;-hydroxymethyl-5_AND_alpha;-cholesta-8-en-3_AND_beta;-ol'				'3607'	'H(,2)O+g-CEHC-glucuronide=D-glucuronate+H(''+)+g-carboxyethyl-hydroxychroman'
'm993'	'N-Acetyl-D-glucosaminyldiphosphodolichol'				'3612'	'H(,2)O+2-arachidonoylglycerol=arachidonate+glycerol+H(''+) (reversible)'
'm994'	'4,4-Dimethyl-5alpha-cholesta-8,14,24-trien-3beta-ol'				'3615'	'urate+hydroxyl radical=H(,2)O+urate radical (reversible)'
'm995'	'4,4-Dimethyl-5alpha-cholesta-8,14,24-trien-3beta-ol'				'3620'	'H(''+)+urate+3 hydroxyl radical=allantoate+CO(,2)'
'm996'	'4_AND_alpha;-formyl-4_AND_beta;-methyl-5_AND_alpha;-cholesta-8,24-dien-3_AND_beta;-ol'				'3621'	'L-ascorbate+urate radical=urate+monodehydroascorbate (reversible)'
'm997'	'4alpha-Methylzymosterol-4-carboxylate'				'3633'	'5b-cholestane-3a,7a,12a,27-tetraol+NAD(''+)=NADH+H(''+)+3a,7a,12a-trihydroxy-5b-cholestan-27-al'
'm998'	'13''-carboxy-alpha-tocopherol'				'3640'	'ATP+CoA+3a,12a-dihydroxy-5b-cholanoic acid=AMP+PP(,i)+deoxycholoyl-CoA'
'm999'	'trans-Oct-2-enoyl-CoA'				'3644'	'ATP+CoA+taurine+lithocholate=AMP+CoA+PP(,i)+H(''+)+taurolithocholate'
'm1000'	'3-Oxooctanoyl-CoA'				'3646'	'ATP+CoA+glycine+lithocholate=AMP+CoA+PP(,i)+H(''+)+glycolithocholate'
'm1001'	'14-Demethyllanosterol'				'3652'	'H(,2)O+propionyl-CoA=CoA+propionate+H(''+)'
'm1002'	'14-Demethyllanosterol'				'3653'	'H(,2)O+propionyl-CoA=CoA+propionate+H(''+)'
'm1003'	'4,4-dimethylcholesta-8(9),14-dien-3beta-ol'				'3654'	'H(,2)O+propionyl-CoA=CoA+propionate+H(''+)'
'm1004'	'4,4-dimethylcholesta-8(9),14-dien-3beta-ol'				'3669'	'UDP-galactose+galactosylceramide=H(''+)+UDP+Digalactosylceramide'
'm1005'	'4_AND_alpha;-hydroxymethyl-4_AND_beta;-methyl-5_AND_alpha;-cholesta-8,24-dien-3_AND_beta;-ol'				'3670'	'UDP-galactose+galactosylceramide=H(''+)+UDP+Digalactosylceramide'
'm1006'	'3beta-Hydroxy-4beta-methyl-5alpha-cholest-7-ene-4alpha-carboxylate'				'3674'	'phosphatidylethanolamine+retinal=H(,2)O+H(''+)+APE'
'm1007'	'Octanoyl-CoA'				'3675'	'H(''+)+retinal+APE=H(,2)O+A2PE-H(,2)'
'm1008'	'Octanoyl-CoA'				'3680'	'UDP-galactose+ceramide=H(''+)+UDP+galactosylceramide'
'm1009'	'(S)-Hydroxyoctanoyl-CoA'				'3682'	'UDP-galactose+ceramide=H(''+)+UDP+galactosylceramide'
'm1010'	'4,4-dimethylcholesta-8(9)-en-3beta-ol'				'3686'	'CMP-`N`-acetylneuraminate+galactosylceramide=CMP+H(''+)+ganglioside GM4'
'm1011'	'4,4-dimethylcholesta-8(9)-en-3beta-ol'				'3688'	'UDP-galactose+Glucosylceramide=H(''+)+UDP+Lactosylceramide'
'm1012'	'alpha-Tocopherol'				'3689'	'NO(,2)-+hydroxyl radical=OH-+nitrogen dioxide radical'
'm1013'	'alpha-Tocopherol'				'3692'	'ATP+CoA+2 H(,2)O+NAD(''+)+O(,2)+11''-carboxy-a-chromanol=acetyl-CoA+AMP+H(,2)O(,2)+NADH+PP(,i)+2 H(''+)+9''-carboxy-a-chromanol'
'm1014'	'13''-hydroxy-alpha-tocopherol'				'3693'	'ATP+CoA+2 H(,2)O+NAD(''+)+O(,2)+11''-carboxy-a-chromanol=acetyl-CoA+AMP+H(,2)O(,2)+NADH+PP(,i)+2 H(''+)+9''-carboxy-a-chromanol'
'm1015'	'1,1-Dichloroethylene epoxide'				'3696'	'`RRR`-a-tocopherol+nitrogen dioxide radical=NO(,2)-+H(''+)+vitamin E radical'
'm1016'	'Glyoxylate'				'3697'	'H(,2)O+galactosylsphingosine=D-galactose+D-sphingosine'
'm1017'	'Oxalate'				'3698'	'phosphoadenosinephosphosulfate+galactosylsphingosine=adenosine 3'',5''-bisphosphate+H(''+)+galactosylsphingosine sulfate'
'm1018'	'2-Bromoacetaldehyde'				'3699'	'phosphoadenosinephosphosulfate+galactosylsphingosine=adenosine 3'',5''-bisphosphate+H(''+)+galactosylsphingosine sulfate'
'm1019'	'1,2-Dibromoethane'				'3703'	'phosphoadenosinephosphosulfate+Lactosylceramide=adenosine 3'',5''-bisphosphate+H(''+)+lactosylceramide sulfate'
'm1020'	'L-Amino acid'				'3704'	'phosphoadenosinephosphosulfate+Lactosylceramide=adenosine 3'',5''-bisphosphate+H(''+)+lactosylceramide sulfate'
'm1021'	'Acetaldehyde'				'3709'	'UDP-galactose+Lactosylceramide=H(''+)+UDP+IsoGlobotriasyl ceramide'
'm1022'	'Acetaldehyde'				'3717'	'(2`S`)-pristanoyl-CoA=(2`R`)-pristanoyl-CoA (reversible)'
'm1023'	'Acetate'				'3725'	'NADP(''+)+testosterone=D(''4)-androstenedione+NADPH+H(''+)'
'm1024'	'Acetate'				'3747'	'H(,2)O+1-`O`-1''-alkenyl-2-acyl-phosphatidylethanolamine=H(''+)+1-`O`-alk-1''-enyl-2-lyso-phosphatidylethanolamine+carboxylate'
'm1025'	'Acetate'				'3748'	'H(,2)O+1-`O`-1''-alkenyl-2-acyl-phosphatidylethanolamine=H(''+)+1-`O`-alk-1''-enyl-2-lyso-phosphatidylethanolamine+carboxylate'
'm1026'	'Acetate'				'3749'	'H(,2)O+1-`O`-1''-alkenyl-2-acyl-phosphatidylethanolamine=H(''+)+1-`O`-alk-1''-enyl-2-lyso-phosphatidylethanolamine+carboxylate'
'm1027'	'Glycine'				'3750'	'H(,2)O+1-`O`-1''-alkenyl-2-acyl-phosphatidylethanolamine=H(''+)+1-`O`-alk-1''-enyl-2-lyso-phosphatidylethanolamine+carboxylate'
'm1028'	'Glycine'				'3754'	'dehydroascorbate+H(,2)O=2,3-diketo-L-gulonate'
'm1029'	'Glycine'				'3756'	'ethanolamine+H(''+)+alk-1-enyl-2-lyso-glycerophosphate=H(,2)O+1-`O`-alk-1''-enyl-2-lyso-phosphatidylethanolamine (reversible)'
'm1030'	'Ethanol'				'3759'	'CoA+plasmenate=acyl-CoA+alk-1-enyl-2-lyso-glycerophosphate'
'm1031'	'Ethanolamine'				'3760'	'CoA+plasmenate=acyl-CoA+alk-1-enyl-2-lyso-glycerophosphate'
'm1032'	'Ethanolamine'				'3763'	'2 L-cysteine+O(,2)=L-cystine+H(,2)O(,2)'
'm1033'	'Hypotaurine'				'3770'	'CDP-diacylglycerol+(`R`)-glycerol 1-monophosphate=CMP+3-(3-`sn`-phosphatidyl)-`sn`-glycerol 1-phosphate+H(''+)'
'm1034'	'Hypotaurine'				'3814'	'NAD(''+)+D-Dihydro-6,8-dithiooctamide=lipoate+NADH+H(''+) (reversible)'
'm1035'	'Taurine'				'3817'	'H(,2)O(,2)+H(''+)+urate=alloxan+urea'
'm1036'	'Ethanolamine phosphate'				'3827'	'NAD(''+)+(`S`)-3-hydroxypalmitoleoyl-CoA=NADH+3-oxopalmitoleoyl-CoA+H(''+)'
'm1037'	'12-oxo-c-LTB3'				'3828'	'NAD(''+)+(`S`)-3-hydroxypalmitoleoyl-CoA=NADH+3-oxopalmitoleoyl-CoA+H(''+)'
'm1038'	'12-oxo-c-LTB3'				'3830'	'NAD(''+)+`cis`-(3`S`)-hydroxytetradec-7-enoyl-CoA=3-oxomyrist-7-enoyl-CoA+NADH+H(''+)'
'm1039'	'12-oxo-c-LTB3'				'3831'	'NAD(''+)+`cis`-(3`S`)-hydroxytetradec-7-enoyl-CoA=3-oxomyrist-7-enoyl-CoA+NADH+H(''+)'
'm1040'	'S-(PGA2)-glutathione'				'3832'	'NAD(''+)+3(`S`)-3-hydroxydodecen-(5`Z`)-oyl-CoA=3-oxolaur-`cis`-5-enoyl-CoA+NADH+H(''+)'
'm1041'	'S-(PGA2)-glutathione'				'3833'	'NAD(''+)+3(`S`)-3-hydroxydodecen-(5`Z`)-oyl-CoA=3-oxolaur-`cis`-5-enoyl-CoA+NADH+H(''+)'
'm1042'	'S-(PGJ2)-glutathione'				'3834'	'NAD(''+)+3(`S`)-3-hydroxydodecen-(5`Z`)-oyl-CoA=3-oxolaur-`cis`-5-enoyl-CoA+NADH+H(''+)'
'm1043'	'S-(9-deoxy-delta9,12-PGD2)-glutathione'				'3835'	'NADPH+H(''+)+1-acyl-glycerone phosphate=NADP(''+)+1-acyl-`sn`-glycerol 3-phosphate'
'm1044'	'S-(9-deoxy-delta9,12-PGD2)-glutathione'				'3836'	'ATP+CoA+palmitoleate=AMP+palmitoleoyl-CoA+PP(,i)'
'm1045'	'S-(9-deoxy-delta9,12-PGD2)-glutathione'				'3837'	'ATP+CoA+palmitoleate=AMP+palmitoleoyl-CoA+PP(,i) (reversible)'
'm1046'	'2,6-dimethyl-trans-2-heptenoyl-CoA'				'3838'	'ATP+CoA+palmitoleate=AMP+palmitoleoyl-CoA+PP(,i) (reversible)'
'm1047'	'3-oxo-(2S)-methylisocapryloyl-CoA'				'3839'	'FAD+palmitoleoyl-CoA=FADH(,2)+`trans`,`cis`-hexadeca-2,9-dienoyl-CoA'
'm1048'	'10,11-dihydro-12R-hydroxy-leukotriene C4'				'3840'	'FAD+palmitoleoyl-CoA=FADH(,2)+`trans`,`cis`-hexadeca-2,9-dienoyl-CoA'
'm1049'	'10,11-dihydro-12R-hydroxy-leukotriene C4'				'3841'	'FAD+`cis`-myrist-7-enoyl-CoA=FADH(,2)+`trans`,`cis`-myristo-2,7-dienoyl-CoA'
'm1050'	'S-(9-hydroxy-PGA2)-glutathione'				'3842'	'FAD+`cis`-myrist-7-enoyl-CoA=FADH(,2)+`trans`,`cis`-myristo-2,7-dienoyl-CoA'
'm1051'	'S-(9-deoxy-delta12-PGD2)-glutathione'				'3843'	'FADH(,2)+`trans`,`cis`-dodeca-2,5-dienoyl-CoA=FAD+`cis`-laur-5-enoyl-CoA'
'm1052'	'Leukotriene C4'				'3844'	'FADH(,2)+`trans`,`cis`-dodeca-2,5-dienoyl-CoA=FAD+`cis`-laur-5-enoyl-CoA'
'm1053'	'2(R),6-dimethyl-heptanoyl-CoA'				'3845'	'CoA+3-oxopalmitoleoyl-CoA=acetyl-CoA+`cis`-myrist-7-enoyl-CoA'
'm1054'	'2(S),6-dimethyl-heptanoyl-CoA'				'3846'	'CoA+3-oxopalmitoleoyl-CoA=acetyl-CoA+`cis`-myrist-7-enoyl-CoA'
'm1055'	'3(S)-hydroxy-2(S),6-dimethyl-heptanoyl-CoA'				'3847'	'CoA+3-oxomyrist-7-enoyl-CoA=acetyl-CoA+`cis`-laur-5-enoyl-CoA'
'm1056'	'4,4-dimethyl-14_AND_alpha;-formyl-5_AND_alpha;-cholesta-8,24-dien-3_AND_beta;-ol'				'3848'	'CoA+3-oxomyrist-7-enoyl-CoA=acetyl-CoA+`cis`-laur-5-enoyl-CoA'
'm1057'	'S-(PGA1)-glutathione'				'3851'	'H(,2)O+`trans`,`cis`-hexadeca-2,9-dienoyl-CoA=(`S`)-3-hydroxypalmitoleoyl-CoA'
'm1058'	'S-(PGA1)-glutathione'				'3853'	'H(,2)O+`trans`,`cis`-myristo-2,7-dienoyl-CoA=`cis`-(3`S`)-hydroxytetradec-7-enoyl-CoA'
'm1059'	'S-(9-hydroxy-PGA1)-glutathione'				'3854'	'H(,2)O+`trans`,`cis`-myristo-2,7-dienoyl-CoA=`cis`-(3`S`)-hydroxytetradec-7-enoyl-CoA (reversible)'
'm1060'	'Squalene'				'3855'	'H(,2)O+`trans`,`cis`-dodeca-2,5-dienoyl-CoA=3(`S`)-3-hydroxydodecen-(5`Z`)-oyl-CoA'
'm1061'	'Squalene'				'3856'	'H(,2)O+`trans`,`cis`-dodeca-2,5-dienoyl-CoA=3(`S`)-3-hydroxydodecen-(5`Z`)-oyl-CoA (reversible)'
'm1062'	'(S)-2,3-Epoxysqualene'				'3858'	'NAD(''+)+12`S`-HHT=NADH+H(''+)+12-oxo-(5`Z`,8`Z`,10`E`)-heptadecatrienoic acid'
'm1063'	'(S)-2,3-Epoxysqualene'				'3862'	'TDP+phospho`enol`pyruvate+H(''+)=TTP+pyruvate'
'm1064'	'Lanosterol'				'3870'	'1,2-diacyl-`sn`-glycerol+H(,2)O=1-monoacylglycerol+H(''+)+carboxylate'
'm1065'	'Lanosterol'				'3871'	'1,2-diacyl-`sn`-glycerol+H(,2)O=1-monoacylglycerol+H(''+)+carboxylate (reversible)'
'm1066'	'4,4-dimethyl-14_AND_alpha;-hydroxymethyl-5_AND_alpha;-cholesta-8,24-dien-3_AND_beta;-ol'				'3872'	'dCDP+phospho`enol`pyruvate+H(''+)=dCTP+pyruvate'
'm1067'	'24,25-Dihydrolanosterol'				'3875'	'ATP+1-phosphatidyl-`myo`-inositol 5-phosphate=ADP+1-phosphatidyl-D-`myo`-inositol 4,5-bisphosphate+H(''+)'
'm1068'	'maltopentaose'				'3876'	'ATP+1-phosphatidyl-`myo`-inositol 5-phosphate=ADP+1-phosphatidyl-D-`myo`-inositol 4,5-bisphosphate+H(''+)'
'm1069'	'all-trans-Hexaprenyl diphosphate'				'3878'	'ATP+1-phosphatidyl-`myo`-inositol 5-phosphate=ADP+1-phosphatidyl-D-`myo`-inositol 4,5-bisphosphate+H(''+)'
'm1070'	'Presqualene diphosphate'				'3879'	'ATP+1-phosphatidyl-`myo`-inositol 5-phosphate=ADP+H(''+)+1-phosphatidyl-`myo`-inositol 3,5-bisphosphate'
'm1071'	'Presqualene diphosphate'				'3882'	'ATP+1-phosphatidyl-`myo`-inositol 5-phosphate=ADP+H(''+)+1-phosphatidyl-`myo`-inositol 3,5-bisphosphate'
'm1072'	'trans,cis-deca-2,4-dienoyl-CoA'				'3883'	'ATP+phosphatidyl-`myo`-inositol 3-phosphate=ADP+H(''+)+1-phosphatidyl-`myo`-inositol 3,5-bisphosphate'
'm1073'	'trans,cis-deca-2,4-dienoyl-CoA'				'3884'	'ATP+phosphatidyl-`myo`-inositol 3-phosphate=ADP+H(''+)+1-phosphatidyl-`myo`-inositol 3,5-bisphosphate'
'm1074'	'trans,cis-deca-2,4-dienoyl-CoA'				'3886'	'ATP+phosphatidyl-`myo`-inositol 3-phosphate=ADP+H(''+)+1-phosphatidyl-`myo`-inositol 3,5-bisphosphate'
'm1075'	'trans-_AND_Delta;_ST_SUP_LT_2_ST_/SUP_LT_, cis-_AND_Delta;_ST_SUP_LT_4_ST_/SUP_LT_-decadienoyl-CoA'				'3888'	'NADPH+O(,2)+H(''+)+24-oxo-1a,25-dihydroxyvitamin D(,3)=H(,2)O+NADP(''+)+24-oxo-1a,23,25-trihydroxyvitamin D(,3)'
'm1076'	'cis-deca-4-enoyl-CoA'				'3889'	'NADPH+H(''+)+1-alkyl-glycerone phosphate=NADP(''+)+1-alkyl-2-lyso-`sn`-glycero-3-phosphate'
'm1077'	'cis-deca-4-enoyl-CoA'				'3892'	'arachidonoyl-CoA+O(,2)=H(,2)O(,2)+2-`trans`-`cis`,`cis`,`cis`,`cis`-4,8,11,14-eicosapentaenoyl-CoA'
'm1078'	'trans-3-decenoyl-CoA'				'3893'	'arachidonoyl-CoA+O(,2)=H(,2)O(,2)+2-`trans`-`cis`,`cis`,`cis`,`cis`-4,8,11,14-eicosapentaenoyl-CoA'
'm1079'	'trans-3-decenoyl-CoA'				'3895'	'NAD(''+)+3(`S`)-hydroxy-dihomo-g-linolenoyl-CoA=NADH+H(''+)+3-oxo-dihomo-g-linolenoyl-CoA'
'm1080'	'trans-3-decenoyl-CoA'				'3896'	'CoA+3-oxo-dihomo-g-linolenoyl-CoA=acetyl-CoA+g-linolenoyl-CoA'
'm1081'	'trans-Dec-2-enoyl-CoA'				'3897'	'CoA+3-oxo-6`Z`,9`Z`,12`Z`-octadecatrienoyl-CoA=acetyl-CoA+4`Z`,7`Z`,10`Z`-hexadecatrienoyl-CoA'
'm1082'	'trans-Dec-2-enoyl-CoA'				'3898'	'H(,2)O+2`E`,6`Z`,9`Z`,12`Z`-octadecatetraenoyl-CoA=3(`S`)-hydroxy-6`Z`,9`Z`,12`Z`-octadecatrienoyl-CoA'
'm1083'	'trans-Dec-2-enoyl-CoA'				'3899'	'NAD(''+)+3(`S`)-hydroxy-6`Z`,9`Z`,12`Z`-octadecatrienoyl-CoA=NADH+H(''+)+3-oxo-6`Z`,9`Z`,12`Z`-octadecatrienoyl-CoA'
'm1084'	'3-Oxodecanoyl-CoA'				'3903'	'O(,2)+4`Z`,7`Z`,10`Z`-hexadecatrienoyl-CoA=H(,2)O(,2)+2`E`,4`Z`,7`Z`,10`Z`-hexadecatetraenoyl-CoA'
'm1085'	'Decanoyl-CoA'				'3904'	'2-`trans`-`cis`,`cis`,`cis`,`cis`-4,8,11,14-eicosapentaenoyl-CoA=`trans`-3-`cis`-5,8,11,14-eicosapentaenoyl-CoA'
'm1086'	'(S)-Hydroxydecanoyl-CoA'				'3905'	'2-`trans`-`cis`,`cis`,`cis`,`cis`-4,8,11,14-eicosapentaenoyl-CoA=`trans`-3-`cis`-5,8,11,14-eicosapentaenoyl-CoA'
'm1087'	'beta-D-Galactosyl-1,4-beta-D-glucosylceramide'				'3907'	'O(,2)+g-linolenoyl-CoA=H(,2)O(,2)+2`E`,6`Z`,9`Z`,12`Z`-octadecatetraenoyl-CoA'
'm1088'	'beta-D-Galactosyl-1,4-beta-D-glucosylceramide'				'3908'	'`cis`,`cis`-myristo-5,8-dienoyl-CoA+O(,2)=H(,2)O(,2)+`trans`-2-`cis`,`cis`-5,8-tetradecatrienoyl-CoA'
'm1089'	'beta-D-Galactosyl-1,4-beta-D-glucosylceramide'				'3909'	'`trans`-2-`cis`,`cis`-5,8-tetradecatrienoyl-CoA=(3`E`,5`Z`,8`Z`)-tetradecatrienoyl-CoA'
'm1090'	'beta-D-Galactosyl-1,4-beta-D-glucosylceramide'				'3910'	'(3`E`,5`Z`,8`Z`)-tetradecatrienoyl-CoA=`trans`-2-`cis`,`cis`-4,8-tetradecatrienoyl-CoA'
'm1091'	'Digalactosylceramide'				'3911'	'NADPH+H(''+)+`trans`-2-`cis`,`cis`-4,8-tetradecatrienoyl-CoA=NADP(''+)+`trans`-3-`cis`-8-tetradecadienoyl-CoA'
'm1092'	'Digalactosylceramide'				'3913'	'`trans`-2-`cis`-8-tetradecadienoyl-CoA=`trans`-3-`cis`-8-tetradecadienoyl-CoA (reversible)'
'm1093'	'Digalactosylceramide'				'3914'	'H(,2)O+`trans`-2-`cis`-8-tetradecadienoyl-CoA=(3`S`)-3-hydroxy-`cis`-8-tetradecenoyl-CoA'
'm1094'	'Digalactosylceramide'				'3915'	'NAD(''+)+(3`S`)-3-hydroxy-`cis`-8-tetradecenoyl-CoA=NADH+H(''+)+3-oxo-`cis`-8-tetradecenoyl-CoA'
'm1095'	'Lactosylceramide sulfate'				'3916'	'CoA+3-oxo-`cis`-8-tetradecenoyl-CoA=acetyl-CoA+`cis`-6-dodecenoyl-CoA'
'm1096'	'Lactosylceramide sulfate'				'3918'	'phosphoadenosinephosphosulfate+reduced thioredoxin=adenosine 3'',5''-bisphosphate+2 H(''+)+oxidized thioredoxin+sulfite'
'm1097'	'Digalactosylceramidesulfate'				'3919'	'leukotriene B(,4)+NAD(''+)=NADH+H(''+)+12-oxo-leukotriene B(,4)'
'm1098'	'Digalactosylceramidesulfate'				'3925'	'H(,2)O+NAD(''+)+20-oxo-leukotriene B(,4)=NADH+2 H(''+)+20-carboxy-leukotriene-B(,4)'
'm1099'	'4(R),8-dimethyl-trans-2-nonenoyl-CoA'				'3926'	'H(,2)O+NAD(''+)+20-oxo-leukotriene B(,4)=NADH+2 H(''+)+20-carboxy-leukotriene-B(,4)'
'm1100'	'3-oxo-4(R),8-dimethyl-nonanoyl-CoA'				'3927'	'H(,2)O+NAD(''+)+20-oxo-leukotriene B(,4)=NADH+2 H(''+)+20-carboxy-leukotriene-B(,4)'
'm1101'	'neuromedin N'				'3928'	'17b-estradiol+NADPH+O(,2)+H(''+)=2-hydroxy-17b-estradiol+H(,2)O+NADP(''+)'
'm1102'	'4(R),8-dimethyl-nonanoyl-CoA'				'3929'	'17b-estradiol+NADPH+O(,2)+H(''+)=2-hydroxy-17b-estradiol+H(,2)O+NADP(''+)'
'm1103'	'4(R),8-dimethyl-nonanoyl-CoA'				'3930'	'NADPH+O(,2)+H(''+)+20-hydroxy-leukotriene B(,4)=H(,2)O+NADP(''+)+20-dihydroxyleukotriene B(,4)'
'm1104'	'4(R),8-dimethyl-nonanoyl-CoA'				'3932'	'NADPH+O(,2)+H(''+)+20-dihydroxyleukotriene B(,4)=H(,2)O+NADP(''+)+20-trihydroxy-leukotriene-B(,4)'
'm1105'	'3(S)-hydroxy-4(R),8-dimethyl-nonanoyl-CoA'				'3934'	'H(,2)O+H(''+)+20-carboxy-leukotriene-B(,4)=20-trihydroxy-leukotriene-B(,4) (reversible)'
'm1106'	'D-Urobilinogen'				'3936'	'NADPH+O(,2)+H(''+)+12-oxo-leukotriene B(,4)=H(,2)O+NADP(''+)+12-oxo-20-hydroxy-leukotriene B(,4)'
'm1107'	'trans,cis-dodeca-2,5-dienoyl-CoA'				'3938'	'NADPH+O(,2)+H(''+)+12-oxo-20-hydroxy-leukotriene B(,4)=H(,2)O+NADP(''+)+12-oxo-20-dihydroxy-leukotriene B(,4)'
'm1108'	'trans,cis-dodeca-2,5-dienoyl-CoA'				'3940'	'NADPH+O(,2)+H(''+)+12-oxo-20-dihydroxy-leukotriene B(,4)=H(,2)O+NADP(''+)+12-oxo-20-trihydroxy-leukotriene B(,4)'
'm1109'	'3-oxolaur-cis-5-enoyl-CoA'				'3943'	'12-oxo-20-trihydroxy-leukotriene B(,4)=H(,2)O+H(''+)+12-oxo-20-carboxy-leukotriene B(,4)'
'm1110'	'3-oxolaur-cis-5-enoyl-CoA'				'3945'	'H(,2)O+1-alkyl-2-acyl-`sn`-glycero-3-phosphocholine=H(''+)+1-alkyl-2-lyso-`sn`-glycero-3-phosphocholine+carboxylate'
'm1111'	'3-oxolaur-cis-5-enoyl-CoA'				'3946'	'H(,2)O+1-alkyl-2-acyl-`sn`-glycero-3-phosphocholine=H(''+)+1-alkyl-2-lyso-`sn`-glycero-3-phosphocholine+carboxylate'
'm1112'	'3-oxolaur-6-cis-enoyl-CoA'				'3947'	'H(,2)O+1-alkyl-2-acyl-`sn`-glycero-3-phosphocholine=H(''+)+1-alkyl-2-lyso-`sn`-glycero-3-phosphocholine+carboxylate'
'm1113'	'3-oxolaur-6-cis-enoyl-CoA'				'3948'	'H(,2)O+1-alkyl-2-acyl-`sn`-glycero-3-phosphocholine=H(''+)+1-alkyl-2-lyso-`sn`-glycero-3-phosphocholine+carboxylate'
'm1114'	'3-oxolaur-6-cis-enoyl-CoA'				'3963'	'(5`Z`,8`Z`,11`Z`,13`E`)-(15`S`)-15-Hydroperoxyeicosa-5,8,11,13-tetraenoate=14,15-DiHETE'
'm1115'	'cis-laur-5-enoyl-CoA'				'3966'	'H(,2)O+5(`S`),6(`S`)-epoxy-15(`S`)-hydroxy-7`E`,9`E`,11`Z`,13`E`-eicosatetraenoic acid anion=lipoxin B(,4)'
'm1116'	'cis-laur-5-enoyl-CoA'				'3969'	'H(,2)O+5(`S`),6(`S`)-epoxy-15(`S`)-hydroxy-7`E`,9`E`,11`Z`,13`E`-eicosatetraenoic acid anion=lipoxin B(,4)'
'm1117'	'cis-6-dodecenoyl-CoA'				'3971'	'H(,2)O+5(`S`),6(`S`)-epoxy-15(`S`)-hydroxy-7`E`,9`E`,11`Z`,13`E`-eicosatetraenoic acid anion=lipoxin A(,4)'
'm1118'	'cis-6-dodecenoyl-CoA'				'3973'	'H(,2)O+5(`S`),6(`S`)-epoxy-15(`S`)-hydroxy-7`E`,9`E`,11`Z`,13`E`-eicosatetraenoic acid anion=lipoxin A(,4)'
'm1119'	'cis-6-dodecenoyl-CoA'				'3974'	'leukotriene A(,4)+NADPH+O(,2)+H(''+)=H(,2)O+NADP(''+)+5(`S`),6(`S`)-epoxy-15(`S`)-hydroxy-7`E`,9`E`,11`Z`,13`E`-eicosatetraenoic acid anion'
'm1120'	'(3S)-3-hydroxydodec-cis-6-enoyl-CoA'				'3978'	'arachidonate+O(,2)+reduced acceptor=acceptor+H(,2)O+15(`R`)-Hydroxy-(5`Z`,8`Z`,11`Z`,13`E`)-eicosatetraenoate'
'm1121'	'(3S)-3-hydroxydodec-cis-6-enoyl-CoA'				'3995'	'3(`S`)-2-hydroxyphytanoyl-CoA=formyl-Coa+2(`S`)-pristanal'
'm1122'	'(3S)-3-hydroxydodec-cis-6-enoyl-CoA'				'3996'	'H(,2)O+NAD(''+)+2(`S`)-pristanal=NADH+2 H(''+)+(2`S`,6`R`,10`R`)-pristanate (reversible)'
'm1123'	'3(S)-3-hydroxydodecen-(5Z)-oyl-CoA'				'3997'	'ATP+CoA+(2`S`,6`R`,10`R`)-pristanate=AMP+PP(,i)+(2`S`)-pristanoyl-CoA'
'm1124'	'3(S)-3-hydroxydodecen-(5Z)-oyl-CoA'				'4000'	'H(,2)O+NAD(''+)+2(`R`)-pristanal=NADH+pristanate+2 H(''+)'
'm1125'	'3(S)-3-hydroxydodecen-(5Z)-oyl-CoA'				'4001'	'ATP+CoA+pristanate=AMP+PP(,i)+(2`R`)-pristanoyl-CoA'
'm1126'	'trans,cis-Lauro-2,6-dienoyl-CoA'				'4003'	'2-hydroxyphytanoyl-CoA=formyl-Coa+2(`R`)-pristanal'
'm1127'	'trans,cis-Lauro-2,6-dienoyl-CoA'				'4004'	'H(,2)O+`trans`-2,3-dehydropristanoyl-CoA=3(`R`)-hydroxy-pristanoyl-CoA'
'm1128'	'cis,cis-3,6-Dodecadienoyl-CoA'				'4005'	'NAD(''+)+3(`R`)-hydroxy-pristanoyl-CoA=NADH+H(''+)+3-oxopristanoyl-CoA'
'm1129'	'cis,cis-3,6-Dodecadienoyl-CoA'				'4006'	'(2`S`,6`R`,10`R`)-trimethyl-hendecanoyl-CoA=(2`R`,6`R`,10`R`)-trimethyl-hendecanoyl-CoA (reversible)'
'm1130'	'2-trans-Dodecenoyl-CoA'				'4007'	'O(,2)+(4`R`,8`R`,12`R`)-trimethyl-tridecanoyl-CoA=H(,2)O(,2)+(4`R`,8`R`,12`R`)-trimethyl-2`E`-tridecenoyl-CoA'
'm1131'	'3-Oxododecanoyl-CoA'				'4008'	'O(,2)+(2`S`)-pristanoyl-CoA=H(,2)O(,2)+`trans`-2,3-dehydropristanoyl-CoA'
'm1132'	'Lauroyl-CoA'				'4009'	'H(,2)O+(4`R`,8`R`,12`R`)-trimethyl-2`E`-tridecenoyl-CoA=3(`R`)-hydroxy-(4`R`,8`R`,12`R`)-trimethyl-tridecanoyl-CoA'
'm1133'	'(S)-3-Hydroxydodecanoyl-CoA'				'4010'	'NAD(''+)+3(`R`)-hydroxy-(4`R`,8`R`,12`R`)-trimethyl-tridecanoyl-CoA=NADH+H(''+)+3-oxo-(4`R`,8`R`,12`R`)-trimethyl-tridecanoyl-CoA'
'm1134'	'Heme'				'4011'	'O(,2)+(2`S`,6`R`,10`R`)-trimethyl-hendecanoyl-CoA=H(,2)O(,2)+(2`S`,6`R`,10`R`)-trimethyl-2`E`-hendecenoyl-CoA'
'm1135'	'Heme'				'4012'	'CoA+3-oxo-(2`S`,6`R`,10`R`)-trimethyl-hendecanoyl-CoA=propionyl-CoA+4(`R`),8-dimethyl-nonanoyl-CoA'
'm1136'	'Heme'				'4014'	'NAD(''+)+3(`R`)-hydroxy-(2`S`,6`R`,10)-trimethyl-hendecanoyl-CoA=NADH+H(''+)+3-oxo-(2`S`,6`R`,10`R`)-trimethyl-hendecanoyl-CoA'
'm1137'	'Protoporphyrin'				'4015'	'dopamine+H(,2)O(,2)=2 H(,2)O+dopamine `o`-quinone'
'm1138'	'Protoporphyrin'				'4016'	'dopamine+H(,2)O(,2)=2 H(,2)O+dopamine `o`-quinone (reversible)'
'm1139'	'Protoporphyrinogen IX'				'4017'	'dopamine+H(,2)O(,2)=2 H(,2)O+dopamine `o`-quinone'
'm1140'	'trans-2-cis,cis-5,8-tetradecatrienoyl-CoA'				'4018'	'H(,2)O(,2)+dopamine `o`-quinone=2 H(,2)O+H(''+)+dopaminochrome'
'm1141'	'trans-2-cis,cis-5,8-tetradecatrienoyl-CoA'				'4019'	'H(,2)O(,2)+dopamine `o`-quinone=2 H(,2)O+H(''+)+dopaminochrome'
'm1142'	'(3E,5Z,8Z)-tetradecatrienoyl-CoA'				'4020'	'H(,2)O(,2)+dopamine `o`-quinone=2 H(,2)O+H(''+)+dopaminochrome'
'm1143'	'trans-2-cis,cis-4,8-tetradecatrienoyl-CoA'				'4021'	'CoA+3-oxo-(4`R`,8`R`,12`R`)-trimethyl-tridecanoyl-CoA=acetyl-CoA+(2`R`,6`R`,10`R`)-trimethyl-hendecanoyl-CoA'
'm1144'	'3-oxo-cis,cis-5,8-tetradecadienoyl-CoA'				'4023'	'malonyl-CoA+H(''+)+g-linolenoyl-CoA=CO(,2)+CoA+3-oxo-dihomo-g-linolenoyl-CoA'
'm1145'	'3-oxo-cis,cis-5,8-tetradecadienoyl-CoA'				'4025'	'NADPH+H(''+)+`trans`-2-`cis`,`cis`,`cis`-8,11,14-eicosatetraenoyl-CoA=NADP(''+)+dihomo-g-linolenoyl-CoA'
'm1146'	'3-oxo-cis,cis-5,8-tetradecadienoyl-CoA'				'4028'	'NADPH+H(''+)+eicosa-2`E`,8`Z`,11`Z`,14`Z`,17`Z`-pentaenoyl-CoA=NADP(''+)+(8`Z`,11`Z`,14`Z`,17`Z`)-eicosatetraenoyl-CoA'
'm1147'	'cis,cis-myristo-5,8-dienoyl-CoA'				'4029'	'NADPH+H(''+)+eicosa-2`E`,8`Z`,11`Z`,14`Z`,17`Z`-pentaenoyl-CoA=NADP(''+)+(8`Z`,11`Z`,14`Z`,17`Z`)-eicosatetraenoyl-CoA'
'm1148'	'cis,cis-myristo-5,8-dienoyl-CoA'				'4030'	'NADH+O(,2)+H(''+)+(8`Z`,11`Z`,14`Z`,17`Z`)-eicosatetraenoyl-CoA=2 H(,2)O+NAD(''+)+eicosa-5,8,11,14,17-all-`cis`-pentaenoyl-CoA'
'm1149'	'trans,cis-myristo-2,7-dienoyl-CoA'				'4033'	'NADH+O(,2)+H(''+)+a-linolenoyl-CoA=2 H(,2)O+NAD(''+)+stearidonoyl-CoA'
'm1150'	'trans,cis-myristo-2,7-dienoyl-CoA'				'4035'	'malonyl-CoA+H(''+)+stearidonoyl-CoA=CO(,2)+CoA+3-keto-eicosa-8,11,14,17-all-`cis`-tetraenoyl-CoA'
'm1151'	'trans-3-cis-8-tetradecadienoyl-CoA'				'4040'	'NADPH+H(''+)+3-keto-eicosa-8,11,14,17-all-`cis`-tetraenoyl-CoA=NADP(''+)+3(`S`)-hydroxy-all-`cis`-8,11,14,17-eicosatetraenoyl-CoA'
'm1152'	'trans-2-cis-8-tetradecadienoyl-CoA'				'4042'	'3(`S`)-hydroxy-all-`cis`-8,11,14,17-eicosatetraenoyl-CoA=H(,2)O+eicosa-2`E`,8`Z`,11`Z`,14`Z`,17`Z`-pentaenoyl-CoA'
'm1153'	'3-oxomyrist-7-enoyl-CoA'				'4043'	'3(`S`)-hydroxy-all-`cis`-8,11,14,17-eicosatetraenoyl-CoA=H(,2)O+eicosa-2`E`,8`Z`,11`Z`,14`Z`,17`Z`-pentaenoyl-CoA'
'm1154'	'3-oxomyrist-7-enoyl-CoA'				'4044'	'ATP+CoA+a-linolenate=AMP+PP(,i)+a-linolenoyl-CoA'
'm1155'	'3(S)-hydroxy-5Z,8Z-tetradecadienoyl-CoA'				'4049'	'NADPH+H(''+)+2-`trans`-7,10,13,16,19-all-`cis`-docosahexaenoyl-CoA=NADP(''+)+docosa-7,10,13,16,19-all-`cis`-pentaenoyl-CoA'
'm1156'	'3(S)-hydroxy-5Z,8Z-tetradecadienoyl-CoA'				'4050'	'NADPH+H(''+)+2-`trans`-7,10,13,16,19-all-`cis`-docosahexaenoyl-CoA=NADP(''+)+docosa-7,10,13,16,19-all-`cis`-pentaenoyl-CoA'
'm1157'	'3-oxo-cis-8-tetradecenoyl-CoA'				'4051'	'malonyl-CoA+H(''+)+eicosa-5,8,11,14,17-all-`cis`-pentaenoyl-CoA=CO(,2)+CoA+3-oxo-docosa-7,10,13,16,19-all-`cis`-pentaenoyl-CoA'
'm1158'	'cis-myrist-7-enoyl-CoA'				'4052'	'malonyl-CoA+H(''+)+eicosa-5,8,11,14,17-all-`cis`-pentaenoyl-CoA=CO(,2)+CoA+3-oxo-docosa-7,10,13,16,19-all-`cis`-pentaenoyl-CoA'
'm1159'	'cis-myrist-7-enoyl-CoA'				'4053'	'NADPH+H(''+)+3-oxo-docosa-7,10,13,16,19-all-`cis`-pentaenoyl-CoA=NADP(''+)+3(`S`)-hydroxy-docosa-7,10,13,16,19-all-`cis`-pentaenoyl-CoA'
'm1160'	'(2S,6R,10R)-trimethyl-2E-hendecenoyl-CoA'				'4054'	'NADPH+H(''+)+3-oxo-docosa-7,10,13,16,19-all-`cis`-pentaenoyl-CoA=NADP(''+)+3(`S`)-hydroxy-docosa-7,10,13,16,19-all-`cis`-pentaenoyl-CoA'
'm1161'	'cis-(3S)-hydroxytetradec-7-enoyl-CoA'				'4055'	'3(`S`)-hydroxy-docosa-7,10,13,16,19-all-`cis`-pentaenoyl-CoA=H(,2)O+2-`trans`-7,10,13,16,19-all-`cis`-docosahexaenoyl-CoA'
'm1162'	'cis-(3S)-hydroxytetradec-7-enoyl-CoA'				'4056'	'3(`S`)-hydroxy-docosa-7,10,13,16,19-all-`cis`-pentaenoyl-CoA=H(,2)O+2-`trans`-7,10,13,16,19-all-`cis`-docosahexaenoyl-CoA'
'm1163'	'(3S)-3-hydroxy-cis-8-tetradecenoyl-CoA'				'4057'	'NADPH+H(''+)+2-`trans`-9,12,15,18,21-all-`cis`-tetracosahexaenoyl-CoA=NADP(''+)+tetracosa-9,12,15,18,21-all-`cis`-pentaenoyl-CoA'
'm1164'	'3-oxo-(2S,6R,10R)-trimethyl-hendecanoyl-CoA'				'4058'	'NADPH+H(''+)+2-`trans`-9,12,15,18,21-all-`cis`-tetracosahexaenoyl-CoA=NADP(''+)+tetracosa-9,12,15,18,21-all-`cis`-pentaenoyl-CoA'
'm1165'	'(2S,6R,10R)-trimethyl-hendecanoyl-CoA'				'4059'	'malonyl-CoA+H(''+)+docosa-7,10,13,16,19-all-`cis`-pentaenoyl-CoA=CO(,2)+CoA+3-oxo-all-`cis`-6,9,12,15,18-tetracosapentaenoyl-CoA'
'm1166'	'(2R,6R,10R)-trimethyl-hendecanoyl-CoA'				'4060'	'malonyl-CoA+H(''+)+docosa-7,10,13,16,19-all-`cis`-pentaenoyl-CoA=CO(,2)+CoA+3-oxo-all-`cis`-6,9,12,15,18-tetracosapentaenoyl-CoA'
'm1167'	'3(R)-hydroxy-(2S,6R,10)-trimethyl-hendecanoyl-CoA'				'4061'	'NADPH+H(''+)+3-oxo-all-`cis`-6,9,12,15,18-tetracosapentaenoyl-CoA=NADP(''+)+3(`S`)-hydroxy-tetracosa-9,12,15,18,21-all-`cis`-pentaenoyl-CoA'
'm1168'	'trans-Tetradec-2-enoyl-CoA'				'4062'	'NADPH+H(''+)+3-oxo-all-`cis`-6,9,12,15,18-tetracosapentaenoyl-CoA=NADP(''+)+3(`S`)-hydroxy-tetracosa-9,12,15,18,21-all-`cis`-pentaenoyl-CoA'
'm1169'	'3-Oxotetradecanoyl-CoA'				'4063'	'3(`S`)-hydroxy-tetracosa-9,12,15,18,21-all-`cis`-pentaenoyl-CoA=H(,2)O+2-`trans`-9,12,15,18,21-all-`cis`-tetracosahexaenoyl-CoA'
'm1170'	'all-trans-Heptaprenyl diphosphate'				'4064'	'3(`S`)-hydroxy-tetracosa-9,12,15,18,21-all-`cis`-pentaenoyl-CoA=H(,2)O+2-`trans`-9,12,15,18,21-all-`cis`-tetracosahexaenoyl-CoA'
'm1171'	'Tetradecanoyl-CoA'				'4069'	'ATP+CoA+timnodonate=AMP+PP(,i)+eicosa-5,8,11,14,17-all-`cis`-pentaenoyl-CoA (reversible)'
'm1172'	'(S)-3-Hydroxytetradecanoyl-CoA'				'4070'	'ATP+CoA+timnodonate=AMP+PP(,i)+eicosa-5,8,11,14,17-all-`cis`-pentaenoyl-CoA'
'm1173'	'Coproporphyrinogen III'				'4071'	'4,4-dimethylcholesta-8(9)-en-3b-ol=cholesta-8(9)-en-3b-ol+2 one carbon unit'
'm1174'	'Coproporphyrinogen III'				'4072'	'4,4-dimethylcholesta-8(9)-en-3b-ol=cholesta-8(9)-en-3b-ol+2 one carbon unit'
'm1175'	'Coproporphyrinogen I'				'4073'	'NADPH+H(''+)+4,4-dimethylcholesta-8(9),14-dien-3b-ol=NADP(''+)+4,4-dimethylcholesta-8(9)-en-3b-ol'
'm1176'	'Maltohexaose'				'4074'	'NADPH+H(''+)+4,4-dimethylcholesta-8(9),14-dien-3b-ol=NADP(''+)+4,4-dimethylcholesta-8(9)-en-3b-ol'
'm1177'	'N,N''-Diacetylchitobiosyldiphosphodolichol'				'4075'	'NADH+O(,2)+H(''+)+tetracosa-9,12,15,18,21-all-`cis`-pentaenoyl-CoA=2 H(,2)O+NAD(''+)+tetracosa-6,9,12,15,18,21-all-`cis`-hexaenoyl-CoA'
'm1178'	'2E,4Z,7Z,10Z-hexadecatetraenoyl-CoA'				'4076'	'NADH+O(,2)+H(''+)+tetracosa-9,12,15,18,21-all-`cis`-pentaenoyl-CoA=2 H(,2)O+NAD(''+)+tetracosa-6,9,12,15,18,21-all-`cis`-hexaenoyl-CoA'
'm1179'	'trans,cis,cis-2,7,10-hexadecatrienoyl-CoA'				'4077'	'cholesta-8(9)-en-3b-ol=lathosterol'
'm1180'	'trans,cis,cis-2,7,10-hexadecatrienoyl-CoA'				'4078'	'cholesta-8(9)-en-3b-ol=lathosterol'
'm1181'	'trans,cis,cis-2,7,10-hexadecatrienoyl-CoA'				'4079'	'CoA+3-oxo-all-`cis`-6,9,12,15,18,21-tetracosahexaenoyl-CoA=acetyl-CoA+docosa-4,7,10,13,16,19-all-`cis`-hexaenoyl-CoA'
'm1182'	'4Z,7Z,10Z-hexadecatrienoyl-CoA'				'4080'	'H(,2)O+`trans`-2-all-`cis`-6,9,12,15,18,21-tetracosaheptaenoyl-CoA=(3`S`)-hydroxy-tetracosa-6,9,12,15,18,21-all-`cis`-hexaenoyl-CoA'
'm1183'	'3-oxo-cis,cis-7,10-hexadecadienoyl-CoA'				'4081'	'NAD(''+)+(3`S`)-hydroxy-tetracosa-6,9,12,15,18,21-all-`cis`-hexaenoyl-CoA=NADH+H(''+)+3-oxo-all-`cis`-6,9,12,15,18,21-tetracosahexaenoyl-CoA'
'm1184'	'3-oxo-cis,cis-7,10-hexadecadienoyl-CoA'				'4083'	'NADPH+O(,2)+H(''+)+1a,24`R`,25-trihydroxyvitamin D(,3)=2 H(,2)O+NADP(''+)+24-oxo-1a,25-dihydroxyvitamin D(,3)'
'm1185'	'cis,cis-palmito-7,10-dienoyl-CoA'				'4088'	'O(,2)+tetracosa-6,9,12,15,18,21-all-`cis`-hexaenoyl-CoA=H(,2)O(,2)+`trans`-2-all-`cis`-6,9,12,15,18,21-tetracosaheptaenoyl-CoA'
'm1186'	'cis,cis-palmito-7,10-dienoyl-CoA'				'4090'	'ATP+CoA+nisinate=AMP+PP(,i)+tetracosa-6,9,12,15,18,21-all-`cis`-hexaenoyl-CoA (reversible)'
'm1187'	'trans,cis-hexadeca-2,9-dienoyl-CoA'				'4092'	'NADPH+H(''+)+docosa-4,7,10,13,16,19-all-`cis`-hexaenoyl-CoA=NADP(''+)+adrenoyl-CoA'
'm1188'	'trans,cis-hexadeca-2,9-dienoyl-CoA'				'4094'	'malonyl-CoA+H(''+)+adrenoyl-CoA=CO(,2)+CoA+3-oxo-all-`cis`-6,9,12,15,18-tetracosapentaenoyl-CoA'
'm1189'	'3-oxopalmitoleoyl-CoA'				'4098'	'NADPH+H(''+)+2-`trans`-9,12,15,18-all-`cis`-tetracosapentaenoyl-CoA=NADP(''+)+tetracosa-9,12,15,18-all-`cis`-tetraenoyl-CoA'
'm1190'	'3-oxopalmitoleoyl-CoA'				'4100'	'arachidonoyl-CoA+malonyl-CoA+H(''+)=CO(,2)+CoA+3-oxo-docosa-7,10,13,16-all-`cis`-tetraenoyl-CoA'
'm1191'	'(3S)-3-hydroxy-cis,cis-palmito-7,10-dienoyl-CoA'				'4102'	'NADPH+H(''+)+3-oxo-docosa-7,10,13,16-all-`cis`-tetraenoyl-CoA=NADP(''+)+3(`S`)-hydroxy-docosa-7,10,13,16-all-`cis`-tetraenoyl-CoA'
'm1192'	'(3S)-3-hydroxy-cis,cis-palmito-7,10-dienoyl-CoA'				'4104'	'3(`S`)-hydroxy-docosa-7,10,13,16-all-`cis`-tetraenoyl-CoA=H(,2)O+2`E`,7`Z`,10`Z`,13`Z`,16`Z`-docosapentaenoyl-CoA'
'm1193'	'palmitoleoyl-CoA'				'4108'	'3(`S`)-hydroxy-tetracosa-12,15,18,21-all-`cis`-tetraenoyl-CoA=H(,2)O+2-`trans`-9,12,15,18-all-`cis`-tetracosapentaenoyl-CoA'
'm1194'	'palmitoleoyl-CoA'				'4109'	'NAD(''+)+3(`S`)-hydroxy-tetracosa-6,9,12,15,18-all-`cis`-pentaenoyl-CoA=NADH+H(''+)+3-oxo-all-`cis`-6,9,12,15,18-tetracosapentaenoyl-CoA'
'm1195'	'palmitoleoyl-CoA'				'4111'	'CoA+3-oxo-all-`cis`-6,9,12,15,18-tetracosapentaenoyl-CoA=acetyl-CoA+adrenoyl-CoA'
'm1196'	'palmitoleoyl-CoA'				'4116'	'malonyl-CoA+H(''+)+linoleoyl-CoA=CO(,2)+CoA+3-oxoeicosa-`cis`,`cis`-11,14-dienoyl-CoA'
'm1197'	'(4R,8R,12R)-trimethyl-2E-tridecenoyl-CoA'				'4118'	'NADPH+H(''+)+3-oxoeicosa-`cis`,`cis`-11,14-dienoyl-CoA=NADP(''+)+(3`S`)-hydroxy-eicosa-`cis,cis`-11,14-dienoyl-CoA'
'm1198'	'(S)-3-hydroxypalmitoleoyl-CoA'				'4120'	'(3`S`)-hydroxy-eicosa-`cis,cis`-11,14-dienoyl-CoA=H(,2)O+`trans`,`cis`,`cis`-2,11,14-eicosatrienoyl-CoA'
'm1199'	'(S)-3-hydroxypalmitoleoyl-CoA'				'4122'	'NADPH+H(''+)+`trans`,`cis`,`cis`-2,11,14-eicosatrienoyl-CoA=NADP(''+)+`cis`,`cis`-11,14-eicosadienoyl-CoA'
'm1200'	'3-oxo-(4R,8R,12R)-trimethyl-tridecanoyl-CoA'				'4126'	'NADPH+H(''+)+3-oxo-docosa-`cis`,`cis`,`cis`-10,13,16-trienoyl-CoA=NADP(''+)+3(`S`)-hydroxy-10,13,16-all-`cis`-docosatrienoyl-CoA'
'm1201'	'3(R)-hydroxy-(4R,8R,12R)-trimethyl-tridecanoyl-CoA'				'4128'	'3(`S`)-hydroxy-10,13,16-all-`cis`-docosatrienoyl-CoA=H(,2)O+`trans`,`cis`,`cis`,`cis`-2,10,13,16-docosatetraenoyl-CoA'
'm1202'	'trans-Hexadec-2-enoyl-CoA'				'4132'	'NADPH+H(''+)+`trans`,`cis`,`cis`,`cis`,`cis`-2,10,13,16,19-docosapentaenoyl-CoA=NADP(''+)+all-`cis`-10,13,16,19-docosatetraenoyl-CoA'
'm1203'	'3-Oxopalmitoyl-CoA'				'4136'	'NADPH+H(''+)+3-oxo-docosa-10,13,16,19-all-`cis`-tetraenoyl-CoA=NADP(''+)+3(`S`)-hydroxy-docosa-10,13,16,19-all-`cis`-tetraenoyl-CoA'
'm1204'	'Palmitoyl-CoA'				'4138'	'3(`S`)-hydroxy-docosa-10,13,16,19-all-`cis`-tetraenoyl-CoA=H(,2)O+`trans`,`cis`,`cis`,`cis`,`cis`-2,10,13,16,19-docosapentaenoyl-CoA'
'm1205'	'Palmitoyl-CoA'				'4144'	'NADPH+H(''+)+3-oxo-tetracosa-12,15,18,21-all-`cis`-tetraenoyl-CoA=NADP(''+)+3(`S`)-hydroxy-tetracosa-12,15,18,21-all-`cis`-tetraenoyl-CoA'
'm1206'	'Palmitoyl-CoA'				'4146'	'3(`S`)-hydroxy-tetracosa-12,15,18,21-all-`cis`-tetraenoyl-CoA=H(,2)O+`trans`,`cis`,`cis`,`cis`,`cis`-2,12,15,18,21-tetracosapentaenoyl-CoA'
'm1207'	'Palmitoyl-CoA'				'4147'	'NAD(''+)+3(`S`)-hydroxy-4(`R`),8-dimethyl-nonanoyl-CoA=NADH+H(''+)+3-oxo-4(`R`),8-dimethyl-nonanoyl-CoA'
'm1208'	'4,8,12-Trimethyltridecanoyl-CoA'				'4148'	'NAD(''+)+3(`S`)-hydroxy-2(`S`),6-dimethyl-heptanoyl-CoA=NADH+H(''+)+3-oxo-(2`S`)-methylisocapryloyl-CoA'
'm1209'	'(S)-3-Hydroxyhexadecanoyl-CoA'				'4149'	'NAD(''+)+3(`S`)-hydroxy-4-methyl-pentanoyl-CoA=NADH+H(''+)+3-oxo-4-methyl-pentanoyl-CoA'
'm1210'	'Trihexosylceramide'				'4150'	'24,25-dihydrolanosterol=2 H(''+)+4,4-dimethylcholesta-8(9),14-dien-3b-ol+one carbon unit'
'm1211'	'Trihexosylceramide'				'4153'	'O(,2)+2 H(''+)+squalene+ferrocytochrome `b`(,5)=H(,2)O+squalene oxide+ferricytochrome `b`(,5)'
'm1212'	'Trihexosylceramide'				'4154'	'FAD+4(`R`),8-dimethyl-nonanoyl-CoA=FADH(,2)+4(`R`),8-dimethyl-`trans`-2-nonenoyl-CoA'
'm1213'	'Trihexosylceramide'				'4155'	'FAD+2(`S`),6-dimethyl-heptanoyl-CoA=FADH(,2)+2,6-dimethyl-`trans`-2-heptenoyl-CoA'
'm1214'	'Bilirubin-glucuronoside'				'4156'	'FAD+4-methyl-pentanoyl-CoA=FADH(,2)+4-methyl-`trans`-2-pentenoyl-CoA'
'm1215'	'Bilirubin-glucuronoside'				'4157'	'CoA+3-oxo-4(`R`),8-dimethyl-nonanoyl-CoA=acetyl-CoA+2(`R`),6-dimethyl-heptanoyl-CoA'
'm1216'	'18-CoA-18-oxo-dinorleukotriene B4'				'4158'	'CoA+3-oxo-(2`S`)-methylisocapryloyl-CoA=propionyl-CoA+4-methyl-pentanoyl-CoA'
'm1217'	'18-CoA-18-oxo-dinorleukotriene B4'				'4159'	'CoA+3-oxo-4-methyl-pentanoyl-CoA=acetyl-CoA+isobutyryl-CoA'
'm1218'	'18-CoA-18-oxo-dinorleukotriene B4'				'4160'	'H(,2)O+4(`R`),8-dimethyl-`trans`-2-nonenoyl-CoA=3(`S`)-hydroxy-4(`R`),8-dimethyl-nonanoyl-CoA'
'm1219'	'2E,6Z,9Z,12Z-octadecatetraenoyl-CoA'				'4161'	'H(,2)O+2,6-dimethyl-`trans`-2-heptenoyl-CoA=3(`S`)-hydroxy-2(`S`),6-dimethyl-heptanoyl-CoA'
'm1220'	'stearidonoyl-CoA'				'4162'	'H(,2)O+4-methyl-`trans`-2-pentenoyl-CoA=3(`S`)-hydroxy-4-methyl-pentanoyl-CoA'
'm1221'	'3-oxo-6Z,9Z,12Z-octadecatrienoyl-CoA'				'4163'	'2(`S`),6-dimethyl-heptanoyl-CoA=2(`R`),6-dimethyl-heptanoyl-CoA'
'm1222'	'3-oxo-10(S)-hydroxy-octadeca-6E,8E,12Z-trienoyl-CoA'				'4164'	'ADP+reduced glutaredoxin=dADP+H(,2)O+glutaredoxin (reversible)'
'm1223'	'3-oxo-10(S)-hydroxy-octadeca-6E,8E,12Z-trienoyl-CoA'				'4165'	'ADP+reduced glutaredoxin=dADP+H(,2)O+glutaredoxin'
'm1224'	'3-oxo-10(S)-hydroxy-octadeca-6E,8E,12Z-trienoyl-CoA'				'4181'	'malonyl-CoA+oleoyl-CoA+H(''+)=CO(,2)+CoA+3-oxo-11-`cis`-eicosenoyl-CoA'
'm1225'	'3-oxo-10(R)-hydroxy-octadeca-6E,8E,12Z-trienoyl-CoA'				'4183'	'malonyl-CoA+H(''+)+11-`cis`-eicosenoyl-CoA=CO(,2)+CoA+3-oxo-13`cis`-docosenoyl-CoA'
'm1226'	'3-oxo-10(R)-hydroxy-octadeca-6E,8E,12Z-trienoyl-CoA'				'4185'	'malonyl-CoA+H(''+)+`cis`-13-docosenoyl-CoA=CO(,2)+CoA+3-oxo-`cis`-15-tetracosaenoyl-CoA'
'm1227'	'3-oxo-10(R)-hydroxy-octadeca-6E,8E,12Z-trienoyl-CoA'				'4187'	'NADPH+H(''+)+3-oxo-11-`cis`-eicosenoyl-CoA=NADP(''+)+3(`S`)-hydroxy-11-`cis`-eicosenoyl-CoA'
'm1228'	'trans,cis,cis-2,9,12-octadecatrienoyl-CoA'				'4189'	'3(`S`)-hydroxy-11-`cis`-eicosenoyl-CoA=H(,2)O+`trans`,`cis`-2,11-eicosadienoyl-CoA'
'm1229'	'trans,cis,cis-2,9,12-octadecatrienoyl-CoA'				'4191'	'NADPH+H(''+)+`trans`,`cis`-2,11-eicosadienoyl-CoA=NADP(''+)+11-`cis`-eicosenoyl-CoA'
'm1230'	'alpha-linolenoyl-CoA'				'4193'	'NADPH+H(''+)+3-oxo-13`cis`-docosenoyl-CoA=NADP(''+)+3(`S`)-hydroxy-13`cis`-docosenoyl-CoA'
'm1231'	'3-oxolinoleoyl-CoA'				'4195'	'3(`S`)-hydroxy-13`cis`-docosenoyl-CoA=H(,2)O+`trans`,`cis`-2,13-docosadienoyl-CoA'
'm1232'	'3-oxolinoleoyl-CoA'				'4197'	'NADPH+H(''+)+`trans`,`cis`-2,13-docosadienoyl-CoA=NADP(''+)+`cis`-13-docosenoyl-CoA'
'm1233'	'3(S)-hydroxy-6Z,9Z,12Z-octadecatrienoyl-CoA'				'4202'	'NADPH+H(''+)+3-oxo-`cis`-15-tetracosaenoyl-CoA=NADP(''+)+3(`S`)-hydroxy-`cis`-15-tetracosaenoyl-CoA'
'm1234'	'3(S),10(R)-OH-octadeca-6-trans-4,12-cis-trienoyl-CoA'				'4204'	'3(`S`)-hydroxy-`cis`-15-tetracosaenoyl-CoA=H(,2)O+`trans`,`cis`-2,15-tetracosadienoyl-CoA'
'm1235'	'3(S),10(R)-OH-octadeca-6-trans-4,12-cis-trienoyl-CoA'				'4206'	'NADPH+H(''+)+`trans`,`cis`-2,15-tetracosadienoyl-CoA=NADP(''+)+`cis`-15-tetracosenoyl-CoA'
'm1236'	'3(S),10(R)-OH-octadeca-6-trans-4,12-cis-trienoyl-CoA'				'4211'	'NADPH+O(,2)+H(''+)+stearoyl-CoA=2 H(,2)O+NADP(''+)+oleoyl-CoA'
'm1237'	'trans,cis-2,9-octadecadienoyl-CoA'				'4213'	'malonyl-CoA+palmitoleoyl-CoA+H(''+)=CO(,2)+CoA+3-oxo-`cis`-9-octadecenoyl-CoA'
'm1238'	'(3S)-3-hydroxylinoleoyl-CoA'				'4215'	'NADPH+H(''+)+3-oxo-`cis`-9-octadecenoyl-CoA=NADP(''+)+3(`S`)-hydroxy-`cis`-9-octadecenoyl-CoA'
'm1239'	'(3S)-3-hydroxylinoleoyl-CoA'				'4217'	'3(`S`)-hydroxy-`cis`-9-octadecenoyl-CoA=H(,2)O+`trans`,`cis`-2,9-octadecadienoyl-CoA'
'm1240'	'3-oxo-cis-9-octadecenoyl-CoA'				'4219'	'NADPH+H(''+)+`trans`,`cis`-2,9-octadecadienoyl-CoA=NADP(''+)+oleoyl-CoA'
'm1241'	'gamma-Linolenoyl-CoA'				'4222'	'palmitoyl-CoA+NADPH+O(,2)+H(''+)=2 H(,2)O+NADP(''+)+palmitoleoyl-CoA'
'm1242'	'gamma-Linolenoyl-CoA'				'4225'	'H(,2)O+24-`trans`-trihydroxycoprostenoyl-CoA=24(`R`),25(`R`)-varanoyl-CoA (reversible)'
'm1243'	'gamma-Linolenoyl-CoA'				'4227'	'CoA+24-oxo-25(`R`)-trihydroxycoprostanoyl-CoA=propionyl-CoA+choloyl-CoA'
'm1244'	'3-oxooctadecanoyl-CoA'				'4228'	'NAD(''+)+24(`R`),25(`R`)-varanoyl-CoA=NADH+H(''+)+24-oxo-25(`R`)-trihydroxycoprostanoyl-CoA'
'm1245'	'3-oxooctadecanoyl-CoA'				'4229'	'NAD(''+)+24(`R`),25(`R`)-varanoyl-CoA=NADH+H(''+)+24-oxo-25(`R`)-trihydroxycoprostanoyl-CoA'
'm1246'	'3(S)-hydroxy-cis-9-octadecenoyl-CoA'				'4230'	'NAD(''+)+24(`R`),25(`R`)-varanoyl-CoA=NADH+H(''+)+24-oxo-25(`R`)-trihydroxycoprostanoyl-CoA'
'm1247'	'Linoleoyl-CoA'				'4240'	'H(,2)O+12,13-epoxyoctadec-9(`Z`)-enoate=12,13-hydroxyoctadec-9(`Z`)-enoate'
'm1248'	'Linoleoyl-CoA'				'4242'	'H(,2)O+9,10-epoxyoctadec-12(`Z`)-enoate=9,10-hydroxyoctadec-12(`Z`)-enoate'
'm1249'	'Linoleoyl-CoA'				'4255'	'CDP-ethanolamine+1,2-diacyl-`sn`-glycerol=CMP+phosphatidylethanolamine+H(''+) (reversible)'
'm1250'	'Linoleoyl-CoA'				'4263'	'H(,2)O+L-a-Phosphatidylinositol=`myo`-inositol+phosphatidate+H(''+)'
'm1251'	'3-hydroxyoctadecanoyl-CoA'				'4264'	'H(,2)O+L-a-Phosphatidylinositol=`myo`-inositol+phosphatidate+H(''+)'
'm1252'	'Oleoyl-CoA'				'4265'	'H(,2)O+L-a-Phosphatidylinositol=`myo`-inositol+phosphatidate+H(''+)'
'm1253'	'Oleoyl-CoA'				'4283'	'H(,2)O+L-a-Phosphatidylserine=phosphatidate+H(''+)+L-serine'
'm1254'	'3-Oxostearoyl-CoA'				'4284'	'H(,2)O+L-a-Phosphatidylserine=phosphatidate+H(''+)+L-serine'
'm1255'	'N-Acetyl-D-glucosaminyl-1,3-beta-D-galactosyl-1,4-D- glucosylceramide'				'4285'	'H(,2)O+L-a-Phosphatidylserine=phosphatidate+H(''+)+L-serine'
'm1256'	'Stearoyl-CoA'				'4288'	'H(,2)O+L-a-Phosphatidylserine=1-lyso-2-acyl-phosphatidylserine+H(''+)+carboxylate'
'm1257'	'Stearoyl-CoA'				'4289'	'H(,2)O+L-a-Phosphatidylserine=1-lyso-2-acyl-phosphatidylserine+H(''+)+carboxylate'
'm1258'	'Stearoyl-CoA'				'4290'	'H(,2)O+1-acyl-2-lyso-phosphatidylserine=H(''+)+glycerophosphoserine+carboxylate'
'm1259'	'Stearoyl-CoA'				'4293'	'H(''+)+1-acyl-2-lyso-phosphatidylserine+carboxylate=H(,2)O+L-a-Phosphatidylserine'
'm1260'	'1,3-Diaminopropane'				'4294'	'H(''+)+1-acyl-2-lyso-phosphatidylserine+carboxylate=H(,2)O+L-a-Phosphatidylserine'
'm1261'	'Propenoate'				'4295'	'H(''+)+1-acyl-2-lyso-phosphatidylserine+carboxylate=H(,2)O+L-a-Phosphatidylserine'
'm1262'	'Methylglyoxal'				'4296'	'H(''+)+1-acyl-2-lyso-phosphatidylserine+carboxylate=H(,2)O+L-a-Phosphatidylserine'
'm1263'	'Methylglyoxal'				'4297'	'NADP(''+)+6-`trans`-leukotriene B(,4)=NADPH+H(''+)+5-oxo-6-`trans`-leukotriene B(,4) (reversible)'
'm1264'	'malonic dialdehyde'				'4301'	'NADPH+H(''+)+5-oxo-6-`trans`-leukotriene B(,4)=NADP(''+)+6,7-dihydro-5-oxo-leukotriene B(,4)'
'm1265'	'Pyruvate'				'4302'	'NADPH+H(''+)+5-oxo-6-`trans`-leukotriene B(,4)=NADP(''+)+6,7-dihydro-5-oxo-leukotriene B(,4)'
'm1266'	'Pyruvate'				'4303'	'NADPH+H(''+)+5-oxo-6-`trans`-leukotriene B(,4)=NADP(''+)+6,7-dihydro-5-oxo-leukotriene B(,4)'
'm1267'	'Pyruvate'				'4304'	'NADPH+H(''+)+6,7-dihydro-5-oxo-leukotriene B(,4)=NADP(''+)+6,7-dihydro-leukotriene B(,4)'
'm1268'	'3-Oxopropanoate'				'4308'	'NADP(''+)+6,7-dihydro-leukotriene B(,4)=NADPH+H(''+)+6,7-dihydro-5-oxo-leukotriene B(,4)'
'm1269'	'3-Oxopropanoate'				'4311'	'NADPH+H(''+)+5-oxo-6`E`-12-`epi`-LTB(,4)=NADP(''+)+6,7-dihydro-5-oxo-12-`epi`-LTB(,4)'
'm1270'	'Mercaptopyruvate'				'4313'	'NADPH+H(''+)+6,7-dihydro-5-oxo-12-`epi`-LTB(,4)=NADP(''+)+6,7-dihydro-12-`epi`-LTB(,4)'
'm1271'	'Mercaptopyruvate'				'4320'	'NADP(''+)+6,7-dihydro-12-`epi`-LTB(,4)=NADPH+H(''+)+6,7-dihydro-5-oxo-12-`epi`-LTB(,4)'
'm1272'	'Hydroxypyruvate'				'4322'	'GDP+reduced glutaredoxin=dGDP+H(,2)O+glutaredoxin'
'm1273'	'Hydroxypyruvate'				'4330'	'reduced acceptor+9-HpODE=acceptor+H(,2)O+9-hydroxyoctadecadienoate (reversible)'
'm1274'	'3-Sulfinylpyruvate'				'4331'	'O(,2)+5-oxo-12(`R`)-hydroxy-eicosa-8`E`,10`E`,14`Z`-trienoyl-CoA=H(,2)O(,2)+5-oxo-12(`R`)-hydroxy-eicosa-2`E`,8`E`,10`E`,14`Z`-tetraenoyl-CoA'
'm1275'	'3-Sulfinylpyruvate'				'4332'	'O(,2)+5-oxo-12(`R`)-hydroxy-eicosa-8`E`,10`E`,14`Z`-trienoyl-CoA=H(,2)O(,2)+5-oxo-12(`R`)-hydroxy-eicosa-2`E`,8`E`,10`E`,14`Z`-tetraenoyl-CoA'
'm1276'	'Phosphoenolpyruvate'				'4334'	'ATP+CoA+6,7-dihydro-5-oxo-leukotriene B(,4)=AMP+PP(,i)+5-oxo-12(`R`)-hydroxy-eicosa-8`E`,10`E`,14`Z`-trienoyl-CoA'
'm1277'	'Phosphoenolpyruvate'				'4335'	'ATP+CoA+6,7-dihydro-5-oxo-leukotriene B(,4)=AMP+PP(,i)+5-oxo-12(`R`)-hydroxy-eicosa-8`E`,10`E`,14`Z`-trienoyl-CoA'
'm1278'	'plasmenate'				'4336'	'ATP+CoA+6,7-dihydro-5-oxo-leukotriene B(,4)=AMP+PP(,i)+5-oxo-12(`R`)-hydroxy-eicosa-8`E`,10`E`,14`Z`-trienoyl-CoA'
'm1279'	'plasmenate'				'4337'	'CoA+3,5-dioxo-12(`R`)-hydroxy-eicosa-8`E`,10`E`,14`Z`-trienoyl-CoA=acetyl-CoA+3-oxo-10(`R`)-hydroxy-octadeca-6`E`,8`E`,12`Z`-trienoyl-CoA'
'm1280'	'3-Phosphonooxypyruvate'				'4338'	'CoA+3,5-dioxo-12(`R`)-hydroxy-eicosa-8`E`,10`E`,14`Z`-trienoyl-CoA=acetyl-CoA+3-oxo-10(`R`)-hydroxy-octadeca-6`E`,8`E`,12`Z`-trienoyl-CoA'
'm1281'	'Propanal'				'4339'	'H(,2)O+5-oxo-12(`R`)-hydroxy-eicosa-2`E`,8`E`,10`E`,14`Z`-tetraenoyl-CoA=3(`S`),12(`R`)-dihydroxy-5-oxo-eicosa-8`E`,10`E`,14`Z`-trienoyl-CoA'
'm1282'	'Propanoate'				'4341'	'NAD(''+)+3(`S`),12(`R`)-dihydroxy-5-oxo-eicosa-8`E`,10`E`,14`Z`-trienoyl-CoA=NADH+H(''+)+3,5-dioxo-12(`R`)-hydroxy-eicosa-8`E`,10`E`,14`Z`-trienoyl-CoA'
'm1283'	'Propanoate'				'4342'	'NAD(''+)+3(`S`),12(`R`)-dihydroxy-5-oxo-eicosa-8`E`,10`E`,14`Z`-trienoyl-CoA=NADH+H(''+)+3,5-dioxo-12(`R`)-hydroxy-eicosa-8`E`,10`E`,14`Z`-trienoyl-CoA'
'm1284'	'Propanoate'				'4343'	'NAD(''+)+3(`S`),12(`R`)-dihydroxy-5-oxo-eicosa-8`E`,10`E`,14`Z`-trienoyl-CoA=NADH+H(''+)+3,5-dioxo-12(`R`)-hydroxy-eicosa-8`E`,10`E`,14`Z`-trienoyl-CoA'
'm1285'	'Hydroxyacetone'				'4344'	'H(,2)O+3-oxo-10(`R`)-hydroxy-octadeca-6`E`,8`E`,12`Z`-trienoyl-CoA=CoA+H(''+)+3-oxo-10(`R`)-hydroxy-octadeca-6`E`,8`E`,12`Z`-trienoate'
'm1286'	'Lactaldehyde'				'4345'	'H(,2)O+3-oxo-10(`R`)-hydroxy-octadeca-6`E`,8`E`,12`Z`-trienoyl-CoA=CoA+H(''+)+3-oxo-10(`R`)-hydroxy-octadeca-6`E`,8`E`,12`Z`-trienoate'
'm1287'	'(S)-Lactate'				'4346'	'H(,2)O+3-oxo-10(`R`)-hydroxy-octadeca-6`E`,8`E`,12`Z`-trienoyl-CoA=CoA+H(''+)+3-oxo-10(`R`)-hydroxy-octadeca-6`E`,8`E`,12`Z`-trienoate'
'm1288'	'D-Glyceraldehyde'				'4347'	'NAD(''+)+3(`S`),12(`S`)-dihydroxy-5-oxo-eicosa-8`E`,10`E`,14`Z`-trienoyl-CoA=NADH+H(''+)+3,5-dioxo-12(`S`)-hydroxy-eicosa-8`E`,10`E`,14`Z`-trienoyl-CoA'
'm1289'	'D-Glyceraldehyde'				'4348'	'NAD(''+)+3(`S`),12(`S`)-dihydroxy-5-oxo-eicosa-8`E`,10`E`,14`Z`-trienoyl-CoA=NADH+H(''+)+3,5-dioxo-12(`S`)-hydroxy-eicosa-8`E`,10`E`,14`Z`-trienoyl-CoA'
'm1290'	'D-Glyceraldehyde'				'4349'	'NAD(''+)+3(`S`),12(`S`)-dihydroxy-5-oxo-eicosa-8`E`,10`E`,14`Z`-trienoyl-CoA=NADH+H(''+)+3,5-dioxo-12(`S`)-hydroxy-eicosa-8`E`,10`E`,14`Z`-trienoyl-CoA'
'm1291'	'D-Glyceraldehyde'				'4352'	'CoA+3,5-dioxo-12(`S`)-hydroxy-eicosa-8`E`,10`E`,14`Z`-trienoyl-CoA=acetyl-CoA+3-oxo-10(`S`)-hydroxy-octadeca-6`E`,8`E`,12`Z`-trienoyl-CoA'
'm1292'	'D-Glycerate'				'4353'	'CoA+3,5-dioxo-12(`S`)-hydroxy-eicosa-8`E`,10`E`,14`Z`-trienoyl-CoA=acetyl-CoA+3-oxo-10(`S`)-hydroxy-octadeca-6`E`,8`E`,12`Z`-trienoyl-CoA'
'm1293'	'D-Glycerate'				'4354'	'H(,2)O+3-oxo-10(`S`)-hydroxy-octadeca-6`E`,8`E`,12`Z`-trienoyl-CoA=CoA+H(''+)+3-oxo-10(`S`)-hydroxy-octadeca-6`E`,8`E`,12`Z`-trienoate'
'm1294'	'D-Glycerate'				'4355'	'H(,2)O+3-oxo-10(`S`)-hydroxy-octadeca-6`E`,8`E`,12`Z`-trienoyl-CoA=CoA+H(''+)+3-oxo-10(`S`)-hydroxy-octadeca-6`E`,8`E`,12`Z`-trienoate'
'm1295'	'D-Glycerate'				'4356'	'H(,2)O+3-oxo-10(`S`)-hydroxy-octadeca-6`E`,8`E`,12`Z`-trienoyl-CoA=CoA+H(''+)+3-oxo-10(`S`)-hydroxy-octadeca-6`E`,8`E`,12`Z`-trienoate'
'm1296'	'O-Alkylglycerone phosphate'				'4357'	'H(,2)O+5-oxo-12(`S`)-hydroxy-eicosa-2`E`,8`E`,10`E`,14`Z`-tetraenoyl-CoA=3(`S`),12(`S`)-dihydroxy-5-oxo-eicosa-8`E`,10`E`,14`Z`-trienoyl-CoA'
'm1297'	'alk-1-enyl-2-lyso-glycerophosphate'				'4360'	'ATP+CoA+6,7-dihydro-5-oxo-12-`epi`-LTB(,4)=AMP+PP(,i)+5-oxo-12(`S`)-hydroxy-eicosa-8`E`,10`E`,14`Z`-trienoyl-CoA'
'm1298'	'alk-1-enyl-2-lyso-glycerophosphate'				'4361'	'ATP+CoA+6,7-dihydro-5-oxo-12-`epi`-LTB(,4)=AMP+PP(,i)+5-oxo-12(`S`)-hydroxy-eicosa-8`E`,10`E`,14`Z`-trienoyl-CoA'
'm1299'	'alk-1-enyl-2-lyso-glycerophosphate'				'4362'	'ATP+CoA+6,7-dihydro-5-oxo-12-`epi`-LTB(,4)=AMP+PP(,i)+5-oxo-12(`S`)-hydroxy-eicosa-8`E`,10`E`,14`Z`-trienoyl-CoA'
'm1300'	'3-Aminopropanal'				'4363'	'NADH+2 H(''+)+3a,7a,12a-trihydroxy-5b-cholestanoic acid anion=H(,2)O+NAD(''+)+3a,7a,12a-trihydroxy-5b-cholestan-27-al'
'm1301'	'3-Aminopropanal'				'4364'	'NADH+2 H(''+)+3a,7a,12a-trihydroxy-5b-cholestanoic acid anion=H(,2)O+NAD(''+)+3a,7a,12a-trihydroxy-5b-cholestan-27-al'
'm1302'	'L-Alanine'				'4365'	'NADH+2 H(''+)+3a,7a,12a-trihydroxy-5b-cholestanoic acid anion=H(,2)O+NAD(''+)+3a,7a,12a-trihydroxy-5b-cholestan-27-al'
'm1303'	'L-Alanine'				'4374'	'2 H(,2)O+2 NAD(''+)+spermine dialdehyde=2 NADH+4 H(''+)+spermic acid 2'
'm1304'	'beta-Alanine'				'4375'	'2 H(,2)O+2 NAD(''+)+spermine dialdehyde=2 NADH+4 H(''+)+spermic acid 2'
'm1305'	'beta-Alanine'				'4376'	'2 H(,2)O+2 NAD(''+)+spermine dialdehyde=2 NADH+4 H(''+)+spermic acid 2'
'm1306'	'beta-Alanine'				'4377'	'2 H(,2)O+2 NAD(''+)+spermidine dialdehyde=2 NADH+4 H(''+)+spermidic acid'
'm1307'	'beta-Alanine'				'4378'	'2 H(,2)O+2 NAD(''+)+spermidine dialdehyde=2 NADH+4 H(''+)+spermidic acid'
'm1308'	'Sarcosine'				'4379'	'2 H(,2)O+2 NAD(''+)+spermidine dialdehyde=2 NADH+4 H(''+)+spermidic acid'
'm1309'	'Sarcosine'				'4386'	'H(,2)O+a-CEHC-glucuronide=D-glucuronate+H(''+)+3''-carboxy-a-chromanol'
'm1310'	'Sarcosine'				'4387'	'H(,2)O+a-CEHC-glucuronide=D-glucuronate+H(''+)+3''-carboxy-a-chromanol'
'm1311'	'L-Cysteine'				'4389'	'CoA+3-oxo-10(`R`)-hydroxy-octadeca-6`E`,8`E`,12`Z`-trienoate=acetyl-CoA+8(`R`)-hydroxy-hexadeca-4`E`,6`E`,10`Z`-trienoate'
'm1312'	'L-Cysteine'				'4390'	'CoA+3-oxo-8(`R`)-hydroxy-hexadeca-6`E`,10`Z`-dienoate=acetyl-CoA+6(`R`)-hydroxy-tetradeca-4`E`,8`Z`-dienoate'
'm1313'	'L-Serine'				'4391'	'O(,2)+8(`R`)-hydroxy-hexadeca-4`E`,6`E`,10`Z`-trienoate=H(,2)O(,2)+8(`R`)-hydroxy-hexadeca-2`E`,4`E`,6`E`,10`Z`-tetraenoate'
'm1314'	'L-Serine'				'4392'	'H(,2)O+8(`R`)-hydroxy-hexadeca-2`E`,6`E`,10`Z`-trienoate=3(`S`),8(`R`)-dihydroxy-6`E`,10`Z`-hexadecadienoate'
'm1315'	'L-Serine'				'4393'	'NAD(''+)+3(`S`),8(`R`)-dihydroxy-6`E`,10`Z`-hexadecadienoate=NADH+H(''+)+3-oxo-8(`R`)-hydroxy-hexadeca-6`E`,10`Z`-dienoate'
'm1316'	'L-Serine'				'4394'	'CoA+3-oxo-6(`R`)-hydroxy-tetradec-8-`cis`-enoate=acetyl-CoA+4(`R`)-hydroxy-dodec-6`Z`-enoate'
'm1317'	'L-Serine'				'4395'	'O(,2)+6(`R`)-hydroxy-tetradeca-4`E`,8`Z`-dienoate=H(,2)O(,2)+6(`R`)-hydroxy-tetradeca-2`E`,4`E`,8`Z`-trienoate'
'm1318'	'3-Sulfino-L-alanine'				'4396'	'H(,2)O+6(`R`)-hydroxy-tetradeca-2`E`,8`Z`-dienoate=3(`S`),6(`R`)-dihydroxy-tetradec-8`Z`-enoate'
'm1319'	'3-Sulfino-L-alanine'				'4397'	'NADPH+H(''+)+8(`R`)-hydroxy-hexadeca-2`E`,4`E`,6`E`,10`Z`-tetraenoate=NADP(''+)+8(`R`)-hydroxy-hexadeca-2`E`,6`E`,10`Z`-trienoate'
'm1320'	'3-Sulfino-L-alanine'				'4398'	'NADPH+H(''+)+6(`R`)-hydroxy-tetradeca-2`E`,4`E`,8`Z`-trienoate=NADP(''+)+6(`R`)-hydroxy-tetradeca-2`E`,8`Z`-dienoate'
'm1321'	'Glycerone phosphate'				'4399'	'NAD(''+)+3(`S`),6(`R`)-dihydroxy-tetradec-8`Z`-enoate=NADH+H(''+)+3-oxo-6(`R`)-hydroxy-tetradec-8-`cis`-enoate'
'm1322'	'Glycerone phosphate'				'4400'	'CoA+3-oxo-8(`S`)-hydroxy-hexadeca-6`E`,10`Z`-dienoate=acetyl-CoA+6(`S`)-hydroxy-tetradeca-4`E`,8`Z`-dienoate'
'm1323'	'DL-Glyceraldehyde 3-phosphate'				'4402'	'CoA+3-oxo-10(`S`)-hydroxy-octadeca-6`E`,8`E`,12`Z`-trienoate=acetyl-CoA+8(`S`)-hydroxy-hexadeca-4`E`,6`E`-10`Z`-trienoate'
'm1324'	'3-Phospho-D-glycerate'				'4404'	'H(,2)O+8(`S`)-hydroxy-hexadeca-2`E`,6`E`,10`Z`-trienoate=3(`S`),8(`S`)-dihydroxy-6`E`,10`Z`-hexadecadienoate'
'm1325'	'2-Phospho-D-glycerate'				'4405'	'NAD(''+)+3(`S`),8(`S`)-dihydroxy-6`E`,10`Z`-hexadecadienoate=NADH+H(''+)+3-oxo-8(`S`)-hydroxy-hexadeca-6`E`,10`Z`-dienoate'
'm1326'	'2-Phospho-D-glycerate'				'4407'	'H(,2)O+6(`S`)-hydroxy-tetradeca-2`E`,8`Z`-dienoate=3(`S`),6(`S`)-dihydroxy-tetradec-8`Z`-enoate'
'm1327'	'O-Phospho-L-serine'				'4408'	'NAD(''+)+3(`S`),6(`S`)-dihydroxy-tetradec-8`Z`-enoate=NADH+H(''+)+3-oxo-6(`S`)-hydroxy-tetradec-8`Z`-enoate'
'm1328'	'3-Phospho-D-glyceroyl phosphate'				'4409'	'NADPH+H(''+)+8(`S`)-hydroxy-hexadeca-2`E`,4`E`,6`E`,10`Z`-tetraenoate=NADP(''+)+8(`S`)-hydroxy-hexadeca-2`E`,6`E`,10`Z`-trienoate'
'm1329'	'2,3-Bisphospho-D-glycerate'				'4410'	'NADPH+H(''+)+6(`S`)-hydroxy-tetradeca-2`E`,4`E`,8`Z`-trienoate=NADP(''+)+6(`S`)-hydroxy-tetradeca-2`E`,8`Z`-dienoate'
'm1330'	'Propane-1,2-diol'				'4427'	'prostaglandin J(,2)=D12-Prostaglandin J(,2) (reversible)'
'm1331'	'(S)-Propane-1,2-diol'				'4434'	'ATP+2 CoA+2 H(,2)O+NAD(''+)+NADH+O(,2)+H(''+)+14,15-epoxy-(5`Z`,8`Z`,11`Z`)-eicosatrienoate=acetyl-CoA+AMP+CoA+H(,2)O(,2)+NAD(''+)+NADH+PP(,i)+2 H(''+)+12,13-epoxy-(6`Z`,9`Z`)-octadecadienoic acid'
'm1332'	'Glycerol'				'4435'	'ATP+2 CoA+2 H(,2)O+NAD(''+)+O(,2)+12,13-epoxy-(6`Z`,9`Z`)-octadecadienoic acid=acetyl-CoA+AMP+CoA+H(,2)O(,2)+NADH+PP(,i)+2 H(''+)+10,11-epoxy-(4`Z`,7`Z`)-hexadecadienoic acid'
'm1333'	'Glycerol'				'4437'	'NADH+H(''+)+12-oxo-leukotriene B(,4)=NAD(''+)+10,11-dihydro-12-oxo-LTB(,4)'
'm1334'	'Glycerol'				'4438'	'NADH+H(''+)+12-oxo-leukotriene B(,4)=NAD(''+)+10,11-dihydro-12-oxo-LTB(,4)'
'm1335'	'Glycerol'				'4439'	'NADH+H(''+)+12-oxo-leukotriene B(,4)=NAD(''+)+10,11-dihydro-12-oxo-LTB(,4)'
'm1336'	'Glycerol'				'4441'	'NADPH+H(''+)+10,11-dihydro-12-oxo-LTB(,4)=NADP(''+)+10,11-dihydro-leukotriene B(,4)'
'm1337'	'1-Alkyl-sn-glycero-3-phosphate'				'4442'	'NADPH+H(''+)+10,11-dihydro-12-oxo-LTB(,4)=NADP(''+)+10,11-dihydro-leukotriene B(,4)'
'm1338'	'sn-Glycerol 3-phosphate'				'4443'	'NADPH+H(''+)+10,11-dihydro-12-oxo-LTB(,4)=NADP(''+)+10,11-dihydro-leukotriene B(,4)'
'm1339'	'sn-Glycerol 3-phosphate'				'4444'	'NADPH+H(''+)+10,11-dihydro-12-oxo-LTB(,4)=NADP(''+)+10,11-dihydro-12-epi-leukotriene B(,4)'
'm1340'	'Uroporphyrinogen III'				'4445'	'NADPH+H(''+)+10,11-dihydro-12-oxo-LTB(,4)=NADP(''+)+10,11-dihydro-12-epi-leukotriene B(,4) (reversible)'
'm1341'	'Uroporphyrinogen I'				'4460'	'CoA+3-oxo-5(`S`),12(`R`)-dihydroxy-eicosa-8-`trans`-6,14-`cis`-trienoyl-CoA=acetyl-CoA+3(`S`),10(`R`)-OH-octadeca-6-`trans`-4,12-`cis`-trienoyl-CoA'
'm1342'	'Uroporphyrinogen I'				'4461'	'CoA+3-oxo-5(`S`),12(`R`)-dihydroxy-eicosa-8-`trans`-6,14-`cis`-trienoyl-CoA=acetyl-CoA+3(`S`),10(`R`)-OH-octadeca-6-`trans`-4,12-`cis`-trienoyl-CoA'
'm1343'	'Hydroxymethylbilane'				'4462'	'H(,2)O+3(`S`),10(`R`)-OH-octadeca-6-`trans`-4,12-`cis`-trienoyl-CoA=CoA+H(''+)+3(`S`),10(`R`)-OH-octadeca-6-`trans`-4,12-`cis`-trienoate'
'm1344'	'beta-Carotene'				'4463'	'H(,2)O+3(`S`),10(`R`)-OH-octadeca-6-`trans`-4,12-`cis`-trienoyl-CoA=CoA+H(''+)+3(`S`),10(`R`)-OH-octadeca-6-`trans`-4,12-`cis`-trienoate'
'm1345'	'beta-Carotene'				'4464'	'H(,2)O+3(`S`),10(`R`)-OH-octadeca-6-`trans`-4,12-`cis`-trienoyl-CoA=CoA+H(''+)+3(`S`),10(`R`)-OH-octadeca-6-`trans`-4,12-`cis`-trienoate'
'm1346'	'13E-tetranor-16-oxo-16-CoA-LTE4'				'4465'	'O(,2)+10,11-dihydro-LTB(,4)-CoA=H(,2)O(,2)+5(`S`),12(`R`)-dihydroxy-eicosa-2,8-`trans`-6,14-`cis`-tetraenoyl-CoA'
'm1347'	'CoA-omega-COOH-tetranor-LTE3'				'4466'	'O(,2)+10,11-dihydro-LTB(,4)-CoA=H(,2)O(,2)+5(`S`),12(`R`)-dihydroxy-eicosa-2,8-`trans`-6,14-`cis`-tetraenoyl-CoA'
'm1348'	'trans-2,3-dehydropristanoyl-CoA'				'4467'	'ATP+CoA+10,11-dihydro-leukotriene B(,4)=AMP+PP(,i)+10,11-dihydro-LTB(,4)-CoA'
'm1349'	'(2S)-pristanoyl-CoA'				'4468'	'ATP+CoA+10,11-dihydro-leukotriene B(,4)=AMP+PP(,i)+10,11-dihydro-LTB(,4)-CoA'
'm1350'	'(2R)-pristanoyl-CoA'				'4469'	'ATP+CoA+10,11-dihydro-leukotriene B(,4)=AMP+PP(,i)+10,11-dihydro-LTB(,4)-CoA'
'm1351'	'(2R)-pristanoyl-CoA'				'4470'	'ATP+CoA+10,11-dihydro-leukotriene B(,4)=AMP+PP(,i)+10,11-dihydro-LTB(,4)-CoA'
'm1352'	'3(R)-hydroxy-pristanoyl-CoA'				'4471'	'H(,2)O+5(`S`),12(`R`)-dihydroxy-eicosa-2,8-`trans`-6,14-`cis`-tetraenoyl-CoA=3(`S`),5(`S`),12(`R`)-trihydroxy-eicosa-8-`trans`-6,14-`cis`-trienoyl-CoA'
'm1353'	'all-trans-Octaprenyl diphosphate'				'4472'	'H(,2)O+5(`S`),12(`R`)-dihydroxy-eicosa-2,8-`trans`-6,14-`cis`-tetraenoyl-CoA=3(`S`),5(`S`),12(`R`)-trihydroxy-eicosa-8-`trans`-6,14-`cis`-trienoyl-CoA'
'm1354'	'3-Oxopristanoyl-CoA'				'4473'	'NAD(''+)+3(`S`),5(`S`),12(`R`)-trihydroxy-eicosa-8-`trans`-6,14-`cis`-trienoyl-CoA=NADH+H(''+)+3-oxo-5(`S`),12(`R`)-dihydroxy-eicosa-8-`trans`-6,14-`cis`-trienoyl-CoA'
'm1355'	'18E-20-oxo-20-CoA-LTB4'				'4474'	'NAD(''+)+3(`S`),5(`S`),12(`R`)-trihydroxy-eicosa-8-`trans`-6,14-`cis`-trienoyl-CoA=NADH+H(''+)+3-oxo-5(`S`),12(`R`)-dihydroxy-eicosa-8-`trans`-6,14-`cis`-trienoyl-CoA'
'm1356'	'18E-20-oxo-20-CoA-LTB4'				'4475'	'NAD(''+)+3(`S`),5(`S`),12(`R`)-trihydroxy-eicosa-8-`trans`-6,14-`cis`-trienoyl-CoA=NADH+H(''+)+3-oxo-5(`S`),12(`R`)-dihydroxy-eicosa-8-`trans`-6,14-`cis`-trienoyl-CoA'
'm1357'	'18,20-dioxo-20-CoA-leukotriene B4'				'4485'	'arachidonate+superoxide radical=H(''+)+11-peroxy-5`Z`,8`Z`,12`E`,14`Z`-eicosatetraenoate'
'm1358'	'18,20-dioxo-20-CoA-leukotriene B4'				'4487'	'L-ascorbate+O(,2)+11-peroxy-5`Z`,8`Z`,12`E`,14`Z`-eicosatetraenoate=9,11-cycloperoxy-15-hydroperoxy-5`Z`,13`E`-eicosadienoate+monodehydroascorbate'
'm1359'	'18,20-dioxo-20-CoA-leukotriene B4'				'4496'	'5-oxo-12(`S`)-hydroxy-eicosa-6`E`,8`Z`,10`E`,14`Z`-tetraenoate=5-oxo-6-`trans`-leukotriene B(,4)'
'm1360'	'20-CoA-20-oxo-leukotriene B4'				'4497'	'NADP(''+)+5,12-DiHETE=NADPH+H(''+)+5-oxo-12(`S`)-hydroxy-eicosa-6`E`,8`Z`,10`E`,14`Z`-tetraenoate'
'm1361'	'20-CoA-20-oxo-leukotriene B4'				'4501'	'ATP+2 CoA+2 H(,2)O+NAD(''+)+O(,2)+13''-carboxy-a-tocopherol=AMP+CoA+H(,2)O(,2)+NADH+PP(,i)+propionyl-CoA+2 H(''+)+11''-carboxy-a-chromanol'
'm1362'	'20-CoA-20-oxo-leukotriene B4'				'4502'	'ATP+2 CoA+2 H(,2)O+NAD(''+)+O(,2)+7''-carboxy-a-chromanol=acetyl-CoA+AMP+CoA+H(,2)O(,2)+NADH+PP(,i)+2 H(''+)+5''-carboxy-a-chromanol'
'm1363'	'20-CoA-20-oxo-18R-hydroxyleucotriene B4'				'4503'	'ATP+2 CoA+2 H(,2)O+NAD(''+)+O(,2)+7''-carboxy-a-chromanol=acetyl-CoA+AMP+CoA+H(,2)O(,2)+NADH+PP(,i)+2 H(''+)+5''-carboxy-a-chromanol'
'm1364'	'20-CoA-20-oxo-18R-hydroxyleucotriene B4'				'4508'	'5-hydroxyeicosatetraenoate+NADP(''+)=NADPH+H(''+)+5-oxo-(6`E`,8`Z`,11`Z`,14`Z`)-eicosatetraenoic acid'
'm1365'	'20-CoA-20-oxo-18R-hydroxyleucotriene B4'				'4511'	'thromboxane B(,2)=H(,2)+11-dehydrothromboxane B2'
'm1366'	'2-trans-cis,cis,cis,cis-4,8,11,14-eicosapentaenoyl-CoA'				'4513'	'NADH+H(''+)+11-dehydro-15-keto-TXB(,2)=NAD(''+)+11-dehydro-13,14-dihydro-15-oxo-TXB(,2)'
'm1367'	'2-trans-cis,cis,cis,cis-4,8,11,14-eicosapentaenoyl-CoA'				'4514'	'NAD(''+)+11-dehydrothromboxane B2=NADH+H(''+)+11-dehydro-15-keto-TXB(,2)'
'm1368'	'eicosa-2E,8Z,11Z,14Z,17Z-pentaenoyl-CoA'				'4516'	'NADH+H(''+)+13,14-dihydro-15-oxo-PGE(,1)=NAD(''+)+13,14-dihydro-PGE(,1)'
'm1369'	'eicosa-2E,8Z,11Z,14Z,17Z-pentaenoyl-CoA'				'4517'	'NAD(''+)+prostaglandin E(,1)=NADH+H(''+)+15-oxo-PGE(,1)'
'm1370'	'eicosa-5,8,11,14,17-all-cis-pentaenoyl-CoA'				'4518'	'NADH+H(''+)+15-oxo-PGE(,1)=NAD(''+)+13,14-dihydro-15-oxo-PGE(,1)'
'm1371'	'eicosa-5,8,11,14,17-all-cis-pentaenoyl-CoA'				'4519'	'O(,2)+timnodonate=5-hydroperoxy-EPA'
'm1372'	'trans-3-cis-5,8,11,14-eicosapentaenoyl-CoA'				'4525'	'O(,2)+timnodonate=15(`R`)-hydroperoxy-EPE'
'm1373'	'trans-3-cis-5,8,11,14-eicosapentaenoyl-CoA'				'4529'	'reduced acceptor+15(`R`)-hydroperoxy-EPE=acceptor+H(,2)O+15(`R`)-HEPE'
'm1374'	'3-keto-eicosa-8,11,14,17-all-cis-tetraenoyl-CoA'				'4533'	'2 H(''+)+5-hydroperoxy-EPA=H(,2)O+5-HEPE'
'm1375'	'5-oxo-12(S)-hydroxy-eicosa-2E,8E,10E,14Z-tetraenoyl-CoA'				'4540'	'2 O(,2)+reduced acceptor+timnodonate=acceptor+H(,2)O+PGH(,3)'
'm1376'	'5-oxo-12(R)-hydroxy-eicosa-2E,8E,10E,14Z-tetraenoyl-CoA'				'4550'	'NADP(''+)+5-HEPE=NADPH+H(''+)+5-oxo-EPE'
'm1377'	'5-oxo-12(R)-hydroxy-eicosa-2E,8E,10E,14Z-tetraenoyl-CoA'				'4556'	'O(,2)+reduced acceptor+timnodonate=acceptor+H(,2)O+18`R`-HEPE'
'm1378'	'3,5-dioxo-12(S)-hydroxy-eicosa-8E,10E,14Z-trienoyl-CoA'				'4559'	'O(,2)+reduced acceptor+timnodonate=acceptor+H(,2)O+11`R`-HEPE'
'm1379'	'3,5-dioxo-12(S)-hydroxy-eicosa-8E,10E,14Z-trienoyl-CoA'				'4575'	'3-methylthiopropionate=acrylate+methanethiol'
'm1380'	'3,5-dioxo-12(S)-hydroxy-eicosa-8E,10E,14Z-trienoyl-CoA'				'4580'	'H(,2)O+hepoxilin A(,3)=trioxilin A(,3)'
'm1381'	'3,5-dioxo-12(R)-hydroxy-eicosa-8E,10E,14Z-trienoyl-CoA'				'4593'	'prostaglandin D(,2)=H(,2)O+D12-Prostaglandin J(,2)'
'm1382'	'3,5-dioxo-12(R)-hydroxy-eicosa-8E,10E,14Z-trienoyl-CoA'				'4594'	'5-hydroxyeicosatetraenoate+O(,2)+2 H(''+)=H(,2)O+5,12-DiHETE'
'm1383'	'3,5-dioxo-12(R)-hydroxy-eicosa-8E,10E,14Z-trienoyl-CoA'				'4599'	'O(,2)+2 H(''+)+5-oxo-(6`E`,8`Z`,11`Z`,14`Z`)-eicosatetraenoic acid=H(,2)O+5-oxo-12(`S`)-hydroxy-eicosa-6`E`,8`Z`,10`E`,14`Z`-tetraenoate'
'm1384'	'(8Z,11Z,14Z,17Z)-eicosatetraenoyl-CoA'				'4605'	'glutathione+9-deoxy-D(''12)-PGD(,2)=S-(9-deoxy-D(''12)-PGD(,2))-glutathione'
'm1385'	'(8Z,11Z,14Z,17Z)-eicosatetraenoyl-CoA'				'4608'	'glutathione+prostaglandin J(,2)=S-(PGJ(,2))-glutathione'
'm1386'	'trans-2-cis,cis,cis-8,11,14-eicosatetraenoyl-CoA'				'4611'	'glutathione+D12-Prostaglandin J(,2)=`S`-(9-deoxy-D(''9,12)-PGD(,2))-glutathione'
'm1387'	'3-oxo-dihomo-gama-linolenoyl-CoA'				'4612'	'glutathione+D12-Prostaglandin J(,2)=`S`-(9-deoxy-D(''9,12)-PGD(,2))-glutathione'
'm1388'	'3-oxo-dihomo-gama-linolenoyl-CoA'				'4616'	'leukotriene E(,4)+NADPH+O(,2)+H(''+)=H(,2)O+NADP(''+)+20-hydroxy-leukotriene E(,4)'
'm1389'	'3(S)-hydroxy-all-cis-8,11,14,17-eicosatetraenoyl-CoA'				'4617'	'NAD(''+)+20-hydroxy-leukotriene E(,4)=NADH+H(''+)+20-oxo-leukotriene E(,4)'
'm1390'	'3(S)-hydroxy-all-cis-8,11,14,17-eicosatetraenoyl-CoA'				'4618'	'H(,2)O+NAD(''+)+20-oxo-leukotriene E(,4)=NADH+2 H(''+)+20-COOH-leukotriene E(,4)'
'm1391'	'5-oxo-12(S)-hydroxy-eicosa-8E,10E,14Z-trienoyl-CoA'				'4619'	'NAD(''+)+prostaglandin E(,1)=NADH+prostaglandin E(,2)+H(''+)'
'm1392'	'5-oxo-12(S)-hydroxy-eicosa-8E,10E,14Z-trienoyl-CoA'				'4620'	'glutathione+prostaglandin A(,2)=S-(PGA(,2))-glutathione'
'm1393'	'5-oxo-12(S)-hydroxy-eicosa-8E,10E,14Z-trienoyl-CoA'				'4621'	'glutathione+prostaglandin A(,2)=S-(PGA(,2))-glutathione'
'm1394'	'5-oxo-12(R)-hydroxy-eicosa-8E,10E,14Z-trienoyl-CoA'				'4623'	'NADPH+H(''+)+S-(PGA(,2))-glutathione=NADP(''+)+S-(9-hydroxy-PGA(,2))-glutathione'
'm1395'	'5-oxo-12(R)-hydroxy-eicosa-8E,10E,14Z-trienoyl-CoA'				'4625'	'glutathione+prostaglandin A(,1)=S-(PGA(,1))-glutathione'
'm1396'	'5-oxo-12(R)-hydroxy-eicosa-8E,10E,14Z-trienoyl-CoA'				'4626'	'glutathione+prostaglandin A(,1)=S-(PGA(,1))-glutathione'
'm1397'	'5(S),12(R)-dihydroxy-eicosa-2,8-trans-6,14-cis-tetraenoyl-CoA'				'4628'	'NADPH+H(''+)+S-(PGA(,1))-glutathione=NADP(''+)+S-(9-hydroxy-PGA(,1))-glutathione'
'm1398'	'5(S),12(R)-dihydroxy-eicosa-2,8-trans-6,14-cis-tetraenoyl-CoA'				'4629'	'CoA+18,20-dioxo-20-CoA-leukotriene B(,4)=acetyl-CoA+18-CoA-18-oxo-dinorleukotriene B(,4)'
'm1399'	'3(S),12(S)-dihydroxy-5-oxo-eicosa-8E,10E,14Z-trienoyl-CoA'				'4630'	'CoA+18,20-dioxo-20-CoA-leukotriene B(,4)=acetyl-CoA+18-CoA-18-oxo-dinorleukotriene B(,4)'
'm1400'	'3(S),12(S)-dihydroxy-5-oxo-eicosa-8E,10E,14Z-trienoyl-CoA'				'4631'	'H(,2)O+18-CoA-18-oxo-dinorleukotriene B(,4)=CoA+H(''+)+o-carboxy-trinor-leukotriene B(,4)'
'm1401'	'3(S),12(S)-dihydroxy-5-oxo-eicosa-8E,10E,14Z-trienoyl-CoA'				'4632'	'H(,2)O+18-CoA-18-oxo-dinorleukotriene B(,4)=CoA+H(''+)+o-carboxy-trinor-leukotriene B(,4)'
'm1402'	'3(S),12(R)-dihydroxy-5-oxo-eicosa-8E,10E,14Z-trienoyl-CoA'				'4633'	'H(,2)O+18-CoA-18-oxo-dinorleukotriene B(,4)=CoA+H(''+)+o-carboxy-trinor-leukotriene B(,4)'
'm1403'	'3(S),12(R)-dihydroxy-5-oxo-eicosa-8E,10E,14Z-trienoyl-CoA'				'4634'	'O(,2)+20-CoA-20-oxo-leukotriene B(,4)=H(,2)O(,2)+18`E`-20-oxo-20-CoA-LTB(,4)'
'm1404'	'3(S),12(R)-dihydroxy-5-oxo-eicosa-8E,10E,14Z-trienoyl-CoA'				'4635'	'O(,2)+20-CoA-20-oxo-leukotriene B(,4)=H(,2)O(,2)+18`E`-20-oxo-20-CoA-LTB(,4)'
'm1405'	'3-oxo-5(S),12(R)-dihydroxy-eicosa-8-trans-6,14-cis-trienoyl-CoA'				'4637'	'ATP+CoA+20-carboxy-leukotriene-B(,4)=AMP+PP(,i)+20-CoA-20-oxo-leukotriene B(,4)'
'm1406'	'3-oxo-5(S),12(R)-dihydroxy-eicosa-8-trans-6,14-cis-trienoyl-CoA'				'4638'	'ATP+CoA+20-carboxy-leukotriene-B(,4)=AMP+PP(,i)+20-CoA-20-oxo-leukotriene B(,4)'
'm1407'	'3-oxo-5(S),12(R)-dihydroxy-eicosa-8-trans-6,14-cis-trienoyl-CoA'				'4639'	'ATP+CoA+20-carboxy-leukotriene-B(,4)=AMP+PP(,i)+20-CoA-20-oxo-leukotriene B(,4)'
'm1408'	'dihomo-gama-linolenoyl-CoA'				'4640'	'H(,2)O+18`E`-20-oxo-20-CoA-LTB(,4)=20-CoA-20-oxo-18`R`-hydroxyleucotriene B(,4)'
'm1409'	'trans,cis,cis-2,11,14-eicosatrienoyl-CoA'				'4642'	'NAD(''+)+20-CoA-20-oxo-18`R`-hydroxyleucotriene B(,4)=NADH+H(''+)+18,20-dioxo-20-CoA-leukotriene B(,4)'
'm1410'	'3(S)-hydroxy-dihomo-gama-linolenoyl-CoA'				'4643'	'NAD(''+)+20-CoA-20-oxo-18`R`-hydroxyleucotriene B(,4)=NADH+H(''+)+18,20-dioxo-20-CoA-leukotriene B(,4)'
'm1411'	'3-oxoeicosa-cis,cis-11,14-dienoyl-CoA'				'4644'	'NAD(''+)+20-CoA-20-oxo-18`R`-hydroxyleucotriene B(,4)=NADH+H(''+)+18,20-dioxo-20-CoA-leukotriene B(,4)'
'm1412'	'10,11-dihydro-LTB4-CoA'				'4646'	'prostaglandin A(,2)=prostaglandin C(,2) (reversible)'
'm1413'	'10,11-dihydro-LTB4-CoA'				'4647'	'prostaglandin C(,2)=prostaglandin B(,2) (reversible)'
'm1414'	'10,11-dihydro-LTB4-CoA'				'4648'	'prostaglandin E(,1)=H(,2)O+prostaglandin A(,1)'
'm1415'	'10,11-dihydro-LTB4-CoA'				'4653'	'NADH+H(''+)+CoA-20-COOH-18-oxo-LTE(,4)=NAD(''+)+18(`R`)-hydroxy-20-oxo-20-CoA-LTE(,4)'
'm1416'	'3(S),5(S),12(R)-trihydroxy-eicosa-8-trans-6,14-cis-trienoyl-CoA'				'4654'	'NADH+H(''+)+16,18-oxo-18-CoA-dinor-LTE(,4)=NAD(''+)+16(`S`)-hydroxy-18-oxo-18-CoA-LTE(,4)'
'm1417'	'3(S),5(S),12(R)-trihydroxy-eicosa-8-trans-6,14-cis-trienoyl-CoA'				'4655'	'H(,2)O+CoA-o-COOH-dinor-LTE(,4)=CoA+H(''+)+18-carboxy-dinor-LTE(,4)'
'm1418'	'3(S),5(S),12(R)-trihydroxy-eicosa-8-trans-6,14-cis-trienoyl-CoA'				'4656'	'CoA+CoA-20-COOH-18-oxo-LTE(,4)=acetyl-CoA+CoA-o-COOH-dinor-LTE(,4)'
'm1419'	'Arachidonyl-CoA'				'4657'	'O(,2)+CoA-20-COOH-LTE(,4)=H(,2)O(,2)+18`E`-20-oxo-20-CoA-LTE(,4)'
'm1420'	'Arachidonyl-CoA'				'4658'	'ATP+CoA+20-COOH-leukotriene E(,4)=AMP+PP(,i)+CoA-20-COOH-LTE(,4)'
'm1421'	'Arachidonyl-CoA'				'4659'	'H(,2)O+18`E`-20-oxo-20-CoA-LTE(,4)=18(`R`)-hydroxy-20-oxo-20-CoA-LTE(,4)'
'm1422'	'Arachidonyl-CoA'				'4660'	'H(,2)O+CoA-o-COOH-tetranor-LTE(,3)=CoA+H(''+)+o-COOH-tetranor-LTE(,3)'
'm1423'	'cis,cis-11,14-eicosadienoyl-CoA'				'4661'	'O(,2)+CoA-o-COOH-dinor-LTE(,4)=H(,2)O(,2)+CoA-18-COOH-16`E`-dinor-LTE(,5)'
'm1424'	'trans,cis-2,11-eicosadienoyl-CoA'				'4662'	'NADPH+H(''+)+CoA-18-COOH-16`E`-dinor-LTE(,5)=NADP(''+)+CoA-18-COOH-15`E`-dinor-LTE(,4)'
'm1425'	'(3S)-hydroxy-eicosa-cis,cis-11,14-dienoyl-CoA'				'4663'	'CoA-18-COOH-15`E`-dinor-LTE(,4)=16`E`-18-oxo-18-CoA-dinor-LTE(,4)'
'm1426'	'3-oxo-11-cis-eicosenoyl-CoA'				'4664'	'H(,2)O+16`E`-18-oxo-18-CoA-dinor-LTE(,4)=16(`S`)-hydroxy-18-oxo-18-CoA-LTE(,4)'
'm1427'	'trans-eicos-2-enoyl-CoA'				'4665'	'CoA+16,18-oxo-18-CoA-dinor-LTE(,4)=acetyl-CoA+CoA-o-COOH-tetranor-LTE(,3)'
'm1428'	'11-cis-eicosenoyl-CoA'				'4666'	'O(,2)+CoA-o-COOH-tetranor-LTE(,3)=H(,2)O(,2)+13`E`-tetranor-16-oxo-16-CoA-LTE(,4)'
'm1429'	'3-oxoeicosanoyl-CoA'				'4667'	'H(,2)O+13`E`-tetranor-16-oxo-16-CoA-LTE(,4)=CoA+H(''+)+13`E`-tetranor-16-carboxy-LTE(,4)'
'm1430'	'3(S)-hydroxy-11-cis-eicosenoyl-CoA'				'4671'	'reduced acceptor+prostaglandin G(,1)=acceptor+H(,2)O+prostaglandin H(,1)'
'm1431'	'3-hydroxyeicosanoyl-CoA'				'4672'	'dolichol+NADP(''+)=NADPH+H(''+)+dehydrodolichol (reversible)'
'm1432'	'3(S)-2-hydroxyphytanoyl-CoA'				'4674'	'H(,2)O+dehydrodolichyl diphosphate=Pi+dehydrodolichyl-P'
'm1433'	'Eicosanoyl-CoA'				'4675'	'H(,2)O+dehydrodolichyl-P=Pi+dehydrodolichol'
'm1434'	'Eicosanoyl-CoA'				'4676'	'NADPH+H(''+)+12-oxo-20-carboxy-leukotriene B(,4)=NADP(''+)+12-oxo-10,11-dihydro-20-COOH-LTB(,4)'
[truncated: 2,466 more rows]

## Sheet: iColonGlandular1733
Metabolite ID	Metabolite Name				Reaction ID	Reaction Name
[truncated: 4,669 more rows]

[truncated: 15 more sheets: iCopus2Endometrial1283, iCopus2Glandular1715, iKidneyGlomeruli1276, iKidneyTubules1841, iLiverHepatocytes1705, iLungAlveolar1435, iOvaryStromal1285, iPancreasIslet1650, iProstateGlandular1556, iSkinEpidermal1432, iStomach1Glandular1608, iStomach2Glandular1815, iTestisLeydig1766, iThyroidGlandular1760, iUrinaryBladder1786]
